# Supplementary material for: Organocatalytic atroposelective N-alkylation: divergent synthesis of axially chiral sulfonamides and biaryl amino phenols
Source: Royal Society of Chemistry journal article supplement (doi:10.1039/d2qo00219a), 2022-01-01

## Supporting Information

### **Organocatalytic Atroposelective *N*-Alkylation: Divergent Synthesis of Axially Chiral Sulfonamides and Biaryl Amino Phenols**

Xiao Xiao, Yin-Jie Lu, Hong-Yu Tian, Hai-Jie Zhou, Jia-Wei Li, Yi-Ping Yao, Miao-Lin Ke and Fen-Er Chen\*

[E-mail: rfchen@fudan.edu.cn](mailto:rfchen@fudan.edu.cn)

#### **Index**

|              |                                                                                    |           |
|--------------|------------------------------------------------------------------------------------|-----------|
| <b>I.</b>    | <b>Supplementary Methods.....</b>                                                  | <b>2</b>  |
| <b>II.</b>   | <b>Optimization of Axially Chiral Sulfonamides Synthesis .....</b>                 | <b>3</b>  |
| <b>III.</b>  | <b>General Procedure and Spectra Data of Atroposelective <i>N</i>-Alkylation .</b> | <b>10</b> |
| <b>IV.</b>   | <b>Racemization Experiment .....</b>                                               | <b>60</b> |
| <b>V.</b>    | <b>Gram Scale Reaction .....</b>                                                   | <b>70</b> |
| <b>VI.</b>   | <b>Further Transformation .....</b>                                                | <b>71</b> |
| <b>VII.</b>  | <b>Geometries of the Enantiomeric Transition States .....</b>                      | <b>75</b> |
| <b>VIII.</b> | <b>References .....</b>                                                            | <b>76</b> |
| <b>IX.</b>   | <b>X-ray Crystallography Analysis of Compound 3v .....</b>                         | <b>77</b> |
| <b>X.</b>    | <b>NMR Spectra .....</b>                                                           | <b>79</b> |

#### **I. Supplementary Methods**

**General information.** All experiments were conducted under air atmosphere unless otherwise noted.  $^1\text{H}$  and  $^{13}\text{C}$  NMR spectra were recorded on a Bruker Ascend<sup>TM</sup> 400 (400 MHz) spectrometer. Chemical shifts were reported in parts per million (ppm), and the residual solvent peak was used as an internal reference:  $^1\text{H}$  (chloroform  $\delta$  7.26; DMSO  $\delta$  2.50),  $^{13}\text{C}$  (chloroform  $\delta$  77.0; DMSO  $\delta$  39.5). Data are reported as follows: chemical shift, multiplicity (s = singlet, d = doublet, t = triplet, q = quartet, m = multiplet, br = broad), coupling constants (Hz) and integration. For thin layer chromatography (TLC), Merck pre-coated TLC plates (Merck 60 F254) were used, and compounds were visualized with a UV light at 254nm. High resolution mass spectra (HRMS) were obtained on an Agilent 1290II-6545 spectrometer. Optical rotations were recorded on a Rudolph Research Analytical Autopol I automatic polarimeter. Enantiomeric excesses (*ee*) were determined by HPLC analysis on Agilent HPLC units, and Waters e2695; column of Chiralcel OD-H, Chiralpak AD-H, AS-H, ID or IE was used. Column chromatography was performed with silica gel (200-300 mesh ASTM). Unless otherwise noted, commercially available reagents purchased from Adamas-beta, TCI, or Energy Chemical and were used as received.

The 2,3-dienoate adducts 2<sup>[1]</sup>, MBH acetates 4<sup>[2]</sup> and *rac*-**8**<sup>[3]</sup> were synthesized in one step from commercially available materials by literature methods.

## II. Optimization of axially chiral sulfonamides synthesis

**Supplementary Table 1. Attempt of Synthesis of Axially Chiral Sulfonamides from Allenates *via* Phosphine Catalysis<sup>a,b</sup>**

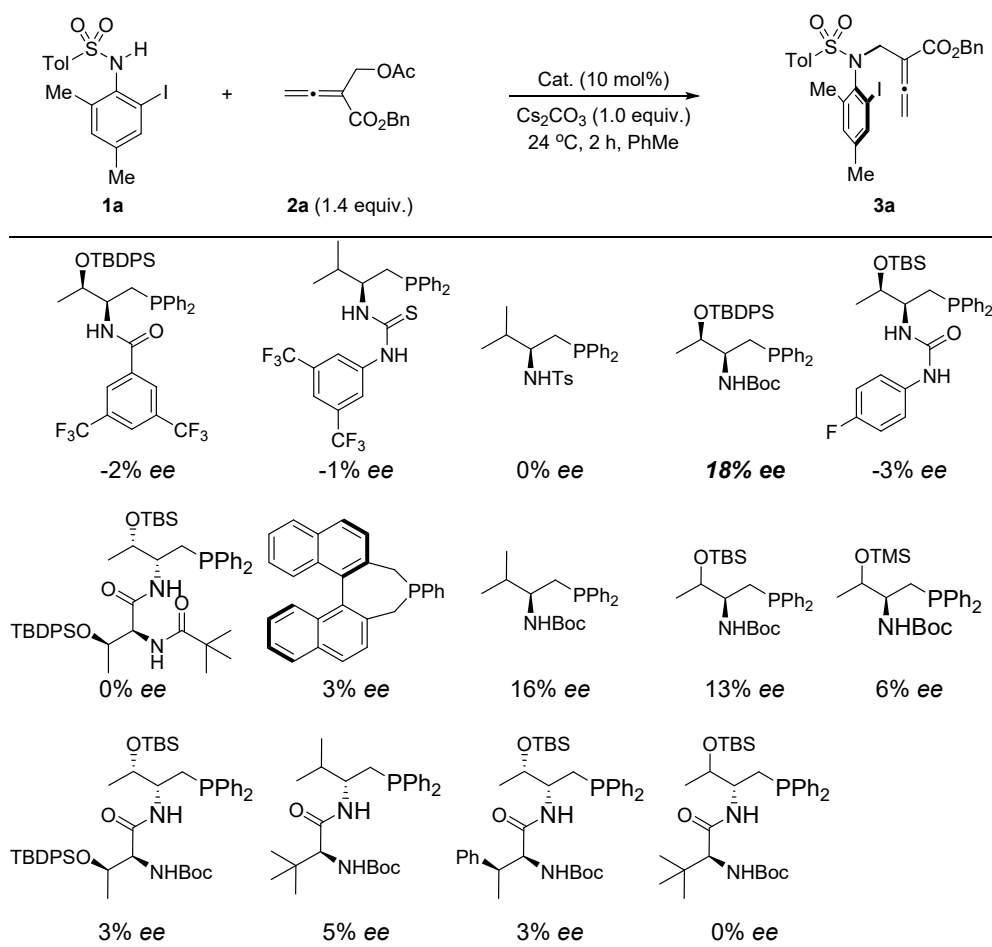

<sup>a</sup>Unless noted otherwise, the reactions were performed with **1** (0.05 mmol), **2** (0.07 mmol, 1.4 equiv.), cat. (10 mol%), and Cs<sub>2</sub>CO<sub>3</sub> (0.05 mmol, 1.0 equiv.) in toluene (0.5 mL) at 24 °C for 2 h. <sup>b</sup>The *ee* value was determined by chiral HPLC.

To a Schlenk tube containing **1** (0.1 mmol), phosphine (10 mol%) and Cs<sub>2</sub>CO<sub>3</sub> (0.1 mmol, 1.0 equiv.) were added toluene (0.5 mL) and dienolate **2a** (0.14 mmol, 1.4 equiv.). The reaction mixture was stirred at 24 °C for 2 h. Then, the *ee* value of **3a** was determined by chiral HPLC.

**Supplementary Table 2. Base and Solvent Screening<sup>a</sup>**

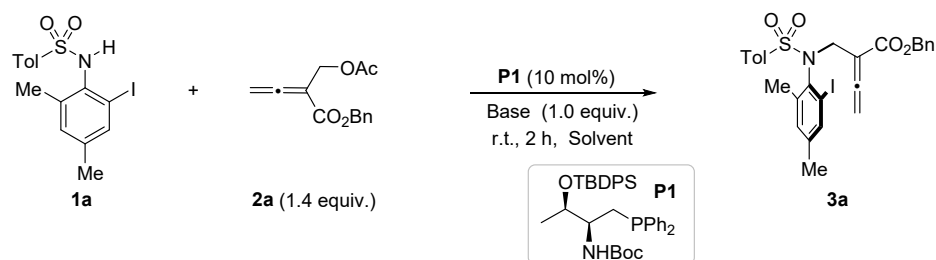

| Entry    | Base                                | Solvent            | ee (%) <sup>b</sup> |
|----------|-------------------------------------|--------------------|---------------------|
| <b>1</b> | <b>Cs<sub>2</sub>CO<sub>3</sub></b> | <b>PhMe</b>        | <b>18</b>           |
| 2        | K <sub>2</sub> CO <sub>3</sub>      | PhMe               | 12                  |
| 3        | Na <sub>2</sub> CO <sub>3</sub>     | PhMe               | 13                  |
| 4        | Li <sub>2</sub> CO <sub>3</sub>     | PhMe               | -                   |
| 5        | KHCO <sub>3</sub>                   | PhMe               | 10                  |
| 6        | NaHCO <sub>3</sub>                  | PhMe               | -                   |
| 7        | K <sub>3</sub> PO <sub>4</sub>      | PhMe               | 7                   |
| 8        | Na <sub>2</sub> HPO <sub>4</sub>    | PhMe               | -                   |
| 9        | Cs <sub>2</sub> CO <sub>3</sub>     | THF                | 0                   |
| 10       | Cs <sub>2</sub> CO <sub>3</sub>     | HCCl <sub>3</sub>  | 0                   |
| 11       | Cs <sub>2</sub> CO <sub>3</sub>     | Et <sub>2</sub> O  | 9                   |
| 12       | Cs <sub>2</sub> CO <sub>3</sub>     | EtOAc              | 3                   |
| 13       | Cs <sub>2</sub> CO <sub>3</sub>     | CH <sub>3</sub> CN | 3                   |
| 14       | Cs <sub>2</sub> CO <sub>3</sub>     | PhCl               | 0                   |
| 15       | Cs <sub>2</sub> CO <sub>3</sub>     | Hexanes            | 3                   |
| 16       | Cs <sub>2</sub> CO <sub>3</sub>     | Acetone            | 0                   |
| 17       | Cs <sub>2</sub> CO <sub>3</sub>     | PhCF <sub>3</sub>  | 0                   |

<sup>a</sup>Unless noted otherwise, the reactions were performed with **1** (0.05 mmol), **2** (0.07 mmol, 1.4 equiv.), **P1** (10 mol%), and Cs<sub>2</sub>CO<sub>3</sub> (0.05 mmol, 1.0 equiv.) in toluene (0.5 mL) at 24 °C for 2 h. <sup>b</sup>The *ee* value was determined by chiral HPLC.

To a Schlenk tube containing **1** (0.1 mmol), **P1** (10 mol%) and base (0.1 mmol, 1.0 equiv.) were added toluene (0.5 mL) and dienophile **2a** (0.14 mmol, 1.4 equiv.). The reaction mixture was stirred at 24 °C for 2 h. Then, the *ee* value of **3a** was determined by chiral HPLC.



## Axially Chiral Sulfonamides from Allenates *via* Amine Catalysis<sup>a</sup>

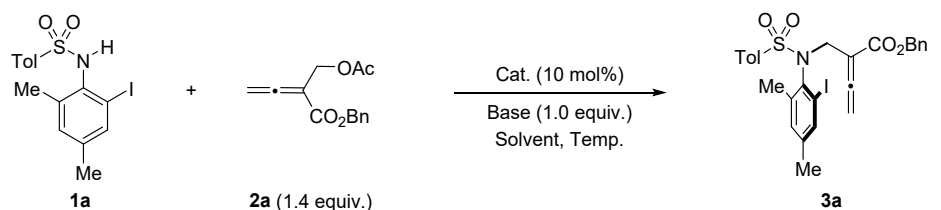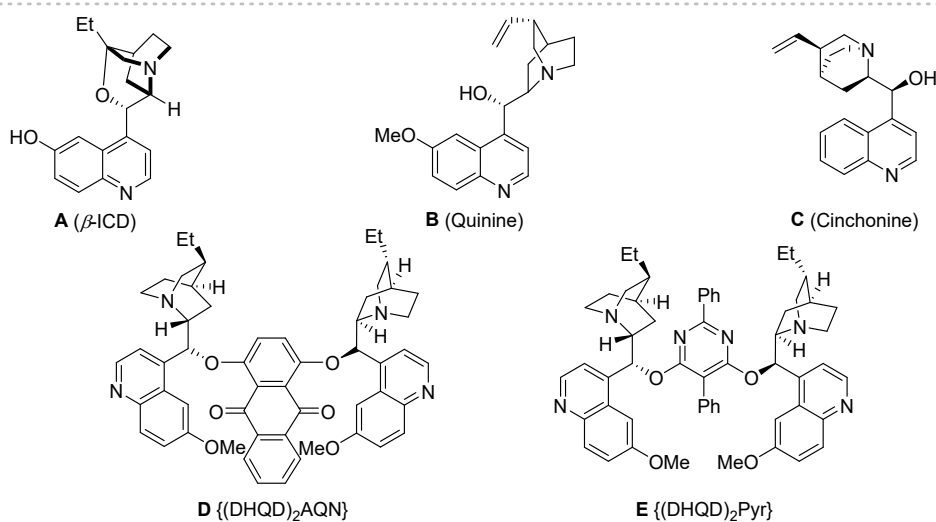

| Entry           | Cat.     | Base                            | Solvent    | Temp. (°C) | Yield (%) <sup>b</sup> | ee (%) <sup>c</sup> |
|-----------------|----------|---------------------------------|------------|------------|------------------------|---------------------|
| 1               | <b>A</b> | -                               | PhMe       | 24         | 71                     | 51                  |
| 2               | <b>B</b> | -                               | PhMe       | 24         | 75                     | 21                  |
| 3               | <b>C</b> | -                               | PhMe       | 24         | 63                     | 15                  |
| 4               | <b>D</b> | -                               | PhMe       | 24         | 67                     | -27                 |
| 5               | <b>E</b> | -                               | PhMe       | 24         | 85                     | -17                 |
| 6               | <b>A</b> | -                               | Mesitylene | 24         | 84                     | 72                  |
| 7 <sup>d</sup>  | <b>A</b> | -                               | Mesitylene | 24         | 83                     | 79                  |
| 8 <sup>d</sup>  | <b>A</b> | -                               | Mesitylene | -20        | 9                      | 88                  |
| 9 <sup>d</sup>  | <b>A</b> | Cs <sub>2</sub> CO <sub>3</sub> | Mesitylene | -20        | 91                     | 84                  |
| 10 <sup>d</sup> | <b>A</b> | Cs <sub>2</sub> CO <sub>3</sub> | Mesitylene | -40        | 92                     | 89                  |
| 11 <sup>d</sup> | <b>A</b> | K <sub>2</sub> CO <sub>3</sub>  | Mesitylene | -40        | 73                     | 88                  |
| 12 <sup>d</sup> | <b>A</b> | Na <sub>2</sub> CO <sub>3</sub> | Mesitylene | -40        | 61                     | 89                  |
| 13 <sup>d</sup> | <b>A</b> | KHCO <sub>3</sub>               | Mesitylene | -40        | 35                     | 83                  |
| 14 <sup>d</sup> | <b>A</b> | K <sub>3</sub> PO <sub>4</sub>  | Mesitylene | -40        | 31                     | 89                  |
| 15 <sup>d</sup> | <b>A</b> | Cs <sub>2</sub> CO <sub>3</sub> | Mesitylene | -50        | 92                     | 90                  |

<sup>a</sup>Unless noted otherwise, the reactions were performed with **1a** (0.05 mmol, 1.0 equiv.), **2a** (0.07 mmol, 1.4 equiv.), catalyst (10 mol%), and base (1.0 equiv.) in solvent (0.5 mL) at 24 to -50 °C for 12 h. <sup>b</sup>Yield was detected by <sup>1</sup>H-NMR. <sup>c</sup>The *ee* value was determined by chiral HPLC. <sup>d</sup>Mesitylene (4 mL) was added.

To a Schlenk tube containing **1** (0.05 mmol), amine (10 mol%) and base (1.0 equiv.)

were added solvent (4 mL) and dienoate **2a** (0.07 mmol, 1.4 equiv.). The reaction mixture was stirred at 24 to -50 °C for 12 h. The solvent was removed by silica gel column chromatography and the residue was then purified by silica gel column chromatography to afford the product **3a**.

#### Supplementary Table 4. Optimization of the Reaction Conditions via Amine Catalysis<sup>a,b</sup>

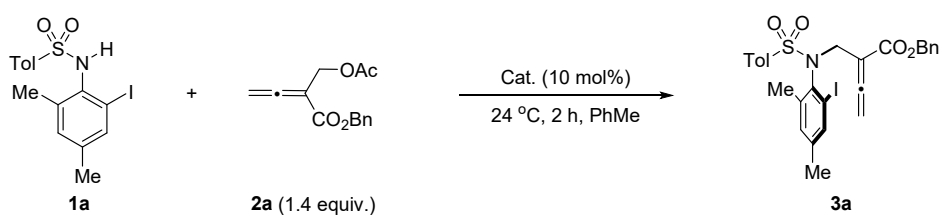

| Entry | Cat.                     | ee (%)    |
|-------|--------------------------|-----------|
| 1     | Hydroquinine             | 19        |
| 2     | <b><i>β</i>-ICD</b>      | <b>51</b> |
| 3     | Quinidine                | 21        |
| 4     | Cinchonine               | 15        |
| 5     | Cinchonidine             | 14        |
| 6     | (DHQD) <sub>2</sub> AQN  | -27       |
| 7     | (DHQD) <sub>2</sub> Pyr  | -17       |
| 8     | (DHQD) <sub>2</sub> PHAL | -17       |
| 9     | (DHQ) <sub>2</sub> AQN   | -27       |
| 10    | (DHQ) <sub>2</sub> Pyr   | 3         |
| 11    | (DHQD) <sub>2</sub> PHAL | 14        |

<sup>a</sup>Unless noted otherwise, the reactions were performed with **1a** (0.05 mmol, 1.0 equiv.), **2a** (0.07 mmol, 1.4 equiv.), catalyst (10 mol%), in toluene (0.5 mL) at 24 °C for 2 h. <sup>b</sup>The *ee* value was determined by chiral HPLC.

To a Schlenk tube containing **1** (0.05 mmol), amine (10 mol%) were added PhMe (0.5 mL) and dienoate **2a** (0.07 mmol, 1.4 equiv.). The reaction mixture was stirred at 24 °C for 2 h. The solvent was removed by silica gel column chromatography and the residue was then purified by silica gel column chromatography to afford the product **3a**. The *ee* value of **3a** was determined by chiral HPLC.

#### Supplementary Table 5. Solvent Screening of the Reaction Conditions via Amine

## Catalysis<sup>a,b</sup>

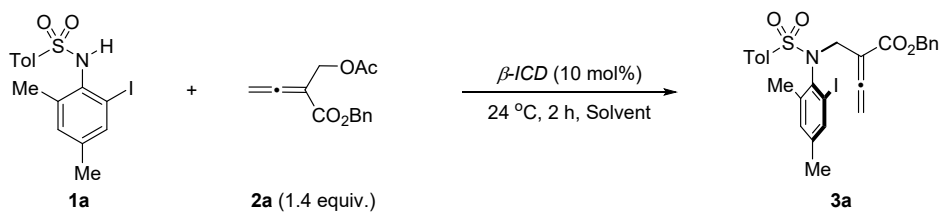

| Entry                 | Solvent            | ee (%)    |
|-----------------------|--------------------|-----------|
| 1                     | DCM                | 47        |
| 2                     | THF                | 5         |
| 3                     | EtOAc              | 21        |
| 4                     | CH <sub>3</sub> CN | 33        |
| 5                     | DMSO               | 2         |
| 6                     | DMF                | 0         |
| 7                     | HCCl <sub>3</sub>  | 49        |
| 8                     | PhCl               | 57        |
| 9                     | PhF                | 55        |
| 10                    | <i>o</i> -DCB      | 53        |
| 11                    | PhCF <sub>3</sub>  | 41        |
| 12                    | PhH                | 57        |
| 13                    | Hexanes            | 32        |
| 14                    | <i>o</i> -Xylene   | 41        |
| 15                    | <i>m</i> -Xylene   | 69        |
| 16                    | <i>p</i> -Xylene   | 67        |
| 17                    | PhEt               | 70        |
| 18                    | PhOMe              | 57        |
| 19                    | Mesitylene         | 72        |
| <b>20<sup>c</sup></b> | <b>Mesitylene</b>  | <b>79</b> |

<sup>a</sup>Unless noted otherwise, the reactions were performed with **1a** (0.05 mmol, 1.0 equiv.), **2a** (0.07 mmol, 1.4 equiv.), catalyst (10 mol%), in toluene (0.5 mL) at 24 °C for 2 h. <sup>b</sup>The *ee* value was determined by chiral HPLC. <sup>c</sup>Mesitylene (4 mL) was added. To a Schlenk tube containing **1** (0.05 mmol), amine (10 mol%) were added PhMe (0.5 mL) and dienoate **2a** (0.07 mmol, 1.4 equiv.). The reaction mixture was stirred at 24 °C for 2 h. The solvent was removed by silica gel column chromatography and the residue was then purified by silica gel column chromatography to afford the product **3a**. The *ee* value of **3a** was determined by chiral HPLC.

## Supplementary Table 6. Optimization of the Reaction Conditions to Access

## Axially Chiral Sulfonamides from MBH Acetate<sup>a</sup>

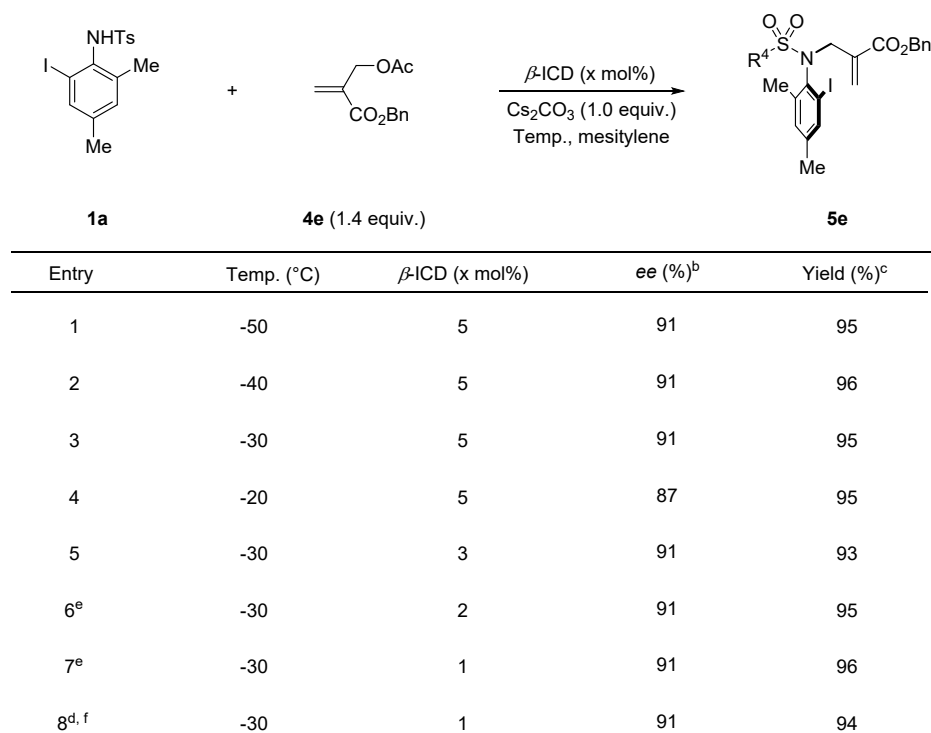

<sup>a</sup>Reaction: **1** (0.1 mmol), **4** (0.14 mmol, 1.4 equiv.),  $\beta$ -ICD (x mol%),  $\text{Cs}_2\text{CO}_3$  (0.1 mmol, 1.0 equiv.) in mesitylene (2 mL) at -30 to -50 °C for 24 h. <sup>b</sup>Isolated yield. <sup>c</sup>The ee value was determined by chiral HPLC. <sup>d</sup>Mesitylene (1 mL) was added. <sup>e</sup>48 h. <sup>f</sup>72 h.

To a Schlenk tube containing **1** (0.1 mmol),  $\beta$ -ICD (x mol%) and  $\text{Cs}_2\text{CO}_3$  (0.1 mmol, 1.0 equiv.) were added mesitylene and MBH acetate **4e** (0.07 mmol, 1.4 equiv.). The reaction mixture was stirred at 24 to -50 °C for 12 h. The solvent was removed by silica gel column chromatography and the residue was then purified by silica gel column chromatography to afford the product **5e**.

## Supplementary Table 7. Optimization of the Selective N-H Activation<sup>a</sup>

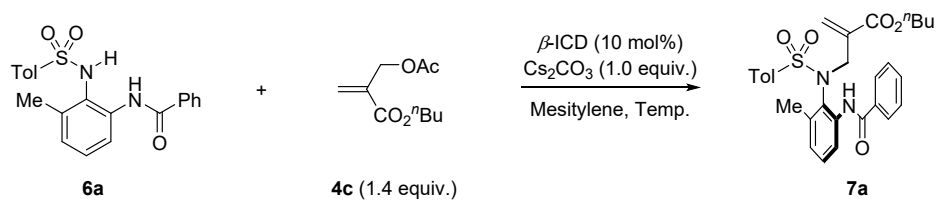

| Entry | Temp. (°C) | Yield (%) <sup>b</sup> | ee (%) <sup>c</sup> |
|-------|------------|------------------------|---------------------|
| 1     | -30        | 71                     | 77                  |
| 2     | -50        | 76                     | 84                  |

<sup>a</sup>Unless noted otherwise, the reactions were performed with **6a** (0.05 mmol), **4a** (0.07 mmol, 1.4 equiv.),  $\beta$ -ICD (10 mol%),  $\text{Cs}_2\text{CO}_3$  (0.05 mmol, 1.0 equiv.) in mesitylene (3 mL) at -30 to -50 °C for 24 h. <sup>b</sup>Isolated yield. <sup>c</sup>The *ee* value was determined by chiral HPLC.

To a Schlenk tube containing **6a** (0.05 mmol),  $\beta$ -ICD (10 mol%) and  $\text{Cs}_2\text{CO}_3$  (0.05 mmol, 1.0 equiv.) were added mesitylene (3 mL) and MBH acetate **4c** (0.07 mmol, 1.4 equiv.). The reaction mixture was stirred at -30 to -50 °C for 24 h. The solvent was removed by silica gel column chromatography and the residue was then purified by silica gel column chromatography to afford the product **7a**.

### Supplementary Table 8. Optimization of Kinetic Resolution of NOBINs<sup>a</sup>

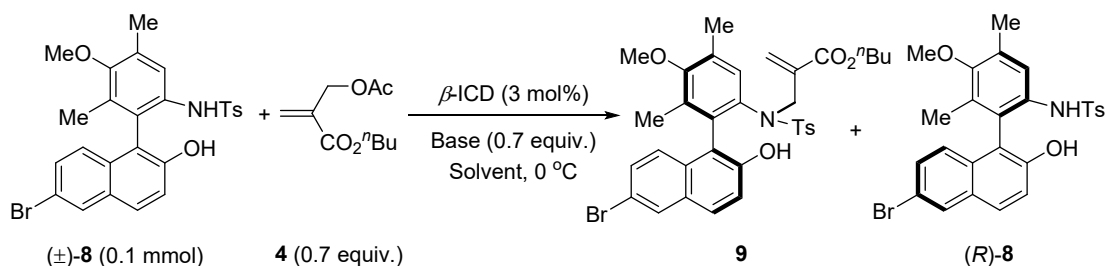

| Entry           | Base                     | Solvent                | Temp. (°C) | C <sup>b</sup> (%) | 8a, ee <sup>c</sup> | 9a, ee <sup>c</sup> | s <sup>d</sup> |
|-----------------|--------------------------|------------------------|------------|--------------------|---------------------|---------------------|----------------|
| 1               | $\text{Cs}_2\text{CO}_3$ | THF                    | 0          | 54                 | 71                  | 60                  | 8              |
| 2               | $\text{Cs}_2\text{CO}_3$ | $\text{CH}_3\text{CN}$ | 0          | 58                 | 33                  | 24                  | 2              |
| 3               | $\text{Cs}_2\text{CO}_3$ | DCM                    | 0          | 30                 | 30                  | 70                  | 8              |
| 4               | $\text{Cs}_2\text{CO}_3$ | toluene                | 0          | 32                 | 36                  | 76                  | 11             |
| 5               | $\text{Cs}_2\text{CO}_3$ | mesitylene             | 0          | 43                 | 37                  | 50                  | 4              |
| 6               | $\text{Cs}_2\text{CO}_3$ | Chlorobenzene          | 0          | 51                 | 73                  | 70                  | 12             |
| 7               | $\text{K}_2\text{CO}_3$  | Chlorobenzene          | 0          | 43                 | 60                  | 81                  | 16             |
| 8               | $\text{Na}_2\text{CO}_3$ | Chlorobenzene          | 0          | 22                 | 23                  | 81                  | 12             |
| 9               | $\text{K}_2\text{CO}_3$  | Chlorobenzene          | -10        | 40                 | 52                  | 80                  | 14             |
| 10 <sup>e</sup> | $\text{K}_2\text{CO}_3$  | Chlorobenzene          | 0          | 55                 | 77                  | 94                  | 27             |

<sup>a</sup>Unless noted otherwise, the reactions were performed with **8a** (0.1 mmol), **4a** (0.07 mmol, 0.7 equiv.),  $\beta$ -ICD (3 mol%), Base (0.07 mmol, 0.7 equiv.) in Solvent (2 mL)

at 0 °C for 12 h. <sup>b</sup>Conversion (C) =  $ee_{8a}/(ee_{8a}+ee_{9a})$ . <sup>c</sup>The *ee* value was determined by chiral HPLC. <sup>d</sup> $S = \ln[(1-\text{Conv.})(1-ee_{8a})]/\ln(1-\text{Conv.})(1+ee_{8a})]$ . <sup>e</sup>the reactions were performed with **8a** (0.1 mmol), **4a** (0.035 mmol, 0.35 equiv.),  $\beta$ -ICD (3 mol%), Base (0.035 mmol, 0.35 equiv.) in Solvent (8 mL) at 0 °C for 36 h

To a Schlenk tube containing **6a** (0.05 mmol),  $\beta$ -ICD (10 mol%) and Cs<sub>2</sub>CO<sub>3</sub> (0.05 mmol, 1.0 equiv.) were added mesitylene (3 mL) and MBH acetate **4c** (0.07 mmol, 1.4 equiv.). The reaction mixture was stirred at -30 to -50 °C for 24 h. The solvent was removed by silica gel column chromatography and the residue was then purified by silica gel column chromatography to afford the product **7a**.

### III. General procedure and spectra data of axially chiral sulfonamides and biaryl amino phenols

#### Representative procedure for synthesis of **3**:

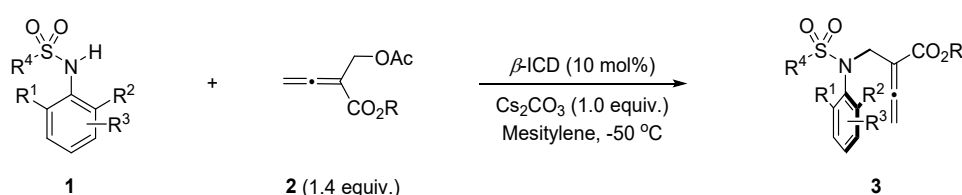

To a Schlenk tube containing **1** (0.05 mmol),  $\beta$ -ICD (1.5 mg, 10 mol%) and Cs<sub>2</sub>CO<sub>3</sub> (0.05 mmol, 1.0 equiv.) were added mesitylene (4 mL) and dienophile **2** (0.07 mmol, 1.4 equiv.). The reaction mixture was stirred at -50 °C for 24 hours to 7 days. The solvent was removed by silica gel column chromatography and the residue was then purified by silica gel column chromatography with hexanes/ethyl acetate as the eluent to afford the product **3**.

#### Characterization of compounds **3**:

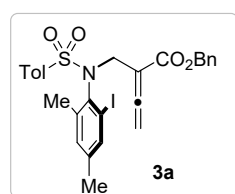

**3a** (91% yield, Hexane-EtOAc = 10:1, R<sub>f</sub> = 0.3). Syrup. <sup>1</sup>H NMR (400 MHz, CDCl<sub>3</sub>)  $\delta$  7.69 (d, *J* = 8.3 Hz, 2H), 7.44 – 7.37 (m, 1H), 7.28 – 7.14 (m, 7H), 6.86 (m, 1H), 5.03 (d, *J* = 12.5 Hz, 1H), 4.98 (d, *J* = 14.6 Hz, 1H), 4.95 (d, *J* = 12.5 Hz, 1H), 4.87 (d, *J* = 14.6 Hz, 1H), 4.49 (s, 2H), 2.35 (s, 3H), 2.15 (s, 3H), 2.06 (s, 3H). <sup>13</sup>C NMR (100

MHz, CDCl<sub>3</sub>) δ 216.45, 165.7, 143.4, 141.9, 139.8, 138.9, 138.3, 137.4, 135.7, 132.1, 129.4, 128.4, 128.4, 128.1, 128.1, 101.4, 96.2, 79.3, 66.8, 48.7, 21.6, 20.4, 20.3.  
**HRMS (ESI)** m/z Calcd for [C<sub>27</sub>H<sub>26</sub>INO<sub>4</sub>S, M + H]<sup>+</sup>: 588.0700; Found: 588.0703.

**Optical Rotation:** [α]<sup>25</sup><sub>D</sub> -30.0 (*c* = 1.0, CHCl<sub>3</sub>). 90% *ee* (HPLC conditions: Chiralpak AD-H column, *n*-Hexane/*i*-PrOH = 80:20, flow rate = 1.0 mL/min, wavelength = 254 nm, *t*<sub>R</sub> = 17.216 min for minor isomer, *t*<sub>R</sub> = 20.148 min for major isomer).

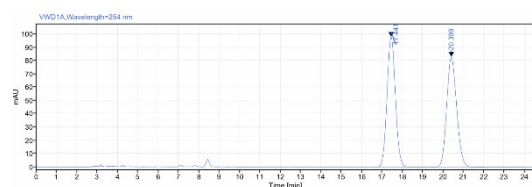

| RT [min] | Type | Width [min] | Area    | Height | Area% | Name |
|----------|------|-------------|---------|--------|-------|------|
| 17.441   | BB   | 2.24        | 2806.96 | 97.95  | 49.93 |      |
| 20.399   | BB   | 2.59        | 2814.58 | 82.99  | 50.07 |      |
|          | Sum  |             | 5621.55 |        |       |      |

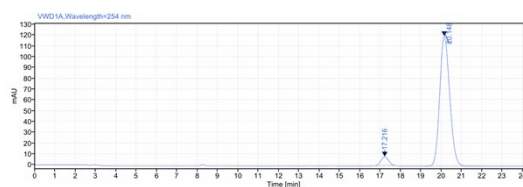

| RT [min] | Type | Width [min] | Area    | Height | Area% | Name |
|----------|------|-------------|---------|--------|-------|------|
| 17.216   | MM m | 0.42        | 216.58  | 8.22   | 5.02  |      |
| 20.148   | BB   | 2.66        | 4100.12 | 120.05 | 94.98 |      |
|          | Sum  |             | 4316.70 |        |       |      |

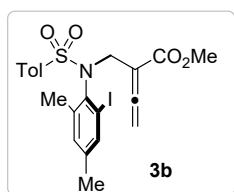

**3b** (92% yield, Hexane-EtOAc = 5:1, R<sub>f</sub> = 0.4). Syrup. <sup>1</sup>H NMR (400 MHz, CDCl<sub>3</sub>) δ 7.78 (d, *J* = 8.2 Hz, 2H), 7.51 (s, 1H), 7.28 (d, *J* = 8.2 Hz, 2H), 6.99 (s, 1H), 5.03 (d, *J* = 14.6 Hz, 1H), 4.93 (d, *J* = 14.6 Hz, 1H), 4.54 (s, 2H), 3.61 (s, 3H), 2.42 (s, 3H), 2.24 (s, 3H), 2.19 (s, 3H). <sup>13</sup>C NMR (100 MHz, CDCl<sub>3</sub>) δ 216.2, 166.2, 143.4, 141.9, 139.8, 138.9, 138.2, 137.3, 132.1, 129.3, 128.3, 101.4, 96.0, 79.2, 52.4, 48.7, 21.5, 20.3, 20.2.  
**HRMS (ESI)** m/z Calcd for [C<sub>20</sub>H<sub>22</sub>INO<sub>4</sub>S, M + Na]<sup>+</sup>: 532.0050; Found: 532.0053.

**Optical Rotation:** [α]<sup>25</sup><sub>D</sub> -35.0 (*c* = 1.0, CHCl<sub>3</sub>). 85% *ee* (HPLC conditions: Chiralpak AD-H column, *n*-Hexane/*i*-PrOH = 90:10, flow rate = 1.0 mL/min, wavelength = 254 nm, *t*<sub>R</sub> = 12.906 min for minor isomer, *t*<sub>R</sub> = 15.073 min for major isomer).

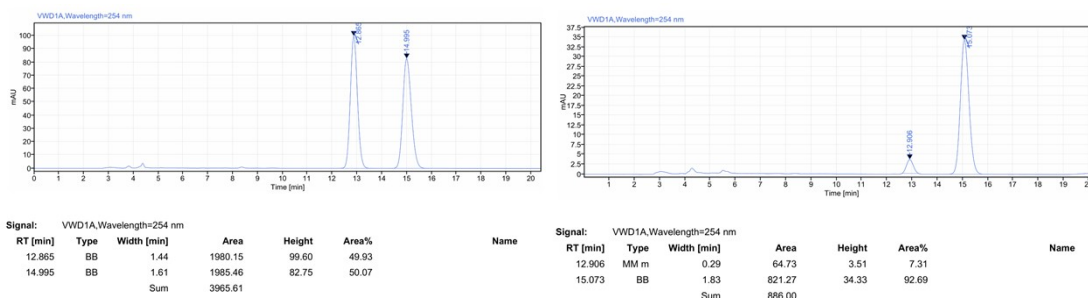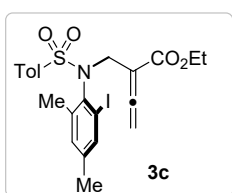

**3c** (85% yield, Hexane-EtOAc = 5:1, R<sub>f</sub> = 0.4). Syrup. <sup>1</sup>H NMR (400 MHz, CDCl<sub>3</sub>) δ 7.77 (d, *J* = 8.2 Hz, 2H), 7.51 (s, 1H), 7.28 (d, *J* = 8.2 Hz, 2H), 6.99 (s, 1H), 5.04 (d, *J* = 14.5 Hz, 1H), 4.93 (d, *J* = 14.5 Hz, 1H), 4.64 – 4.46 (m, 2H), 4.13 – 3.96 (m, 2H), 2.41 (s, 3H), 2.23 (s, 3H), 2.20 (s, 3H), 1.14 (t, *J* = 7.1 Hz, 3H). <sup>13</sup>C NMR (100 MHz, CDCl<sub>3</sub>) δ 216.2, 165.7, 143.4, 141.9, 139.8, 138.9, 138.2, 137.3, 132.0, 129.3, 128.3, 101.4, 96.23, 79.1, 61.3, 48.6, 21.5, 20.3, 20.2, 14.0. HRMS (ESI) *m/z* Calcd for [C<sub>22</sub>H<sub>24</sub>INO<sub>4</sub>S, M + Na]<sup>+</sup>: 548.0363; Found: 548.0365.

**Optical Rotation:** [α]<sub>D</sub><sup>25</sup> -30.0 (*c* = 1.0, CHCl<sub>3</sub>). 92% *ee* (HPLC conditions: Chiralpak AD-H column, *n*-Hexane/*i*-PrOH = 90:10, flow rate = 1.0 mL/min, wavelength = 254 nm, *t*<sub>R</sub> = 15.301 min for minor isomer, *t*<sub>R</sub> = 17.396 min for major isomer).

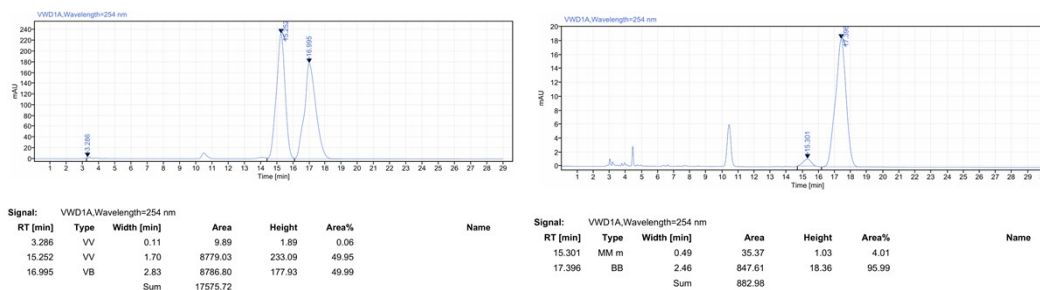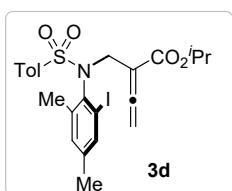

**3d** (95% yield, Hexane-EtOAc = 5:1, R<sub>f</sub> = 0.4). Syrup. <sup>1</sup>H NMR (400 MHz, CDCl<sub>3</sub>) δ 7.77 (d, *J* = 8.2 Hz, 2H), 7.50 (s, 1H), 7.28 (d, *J* = 8.2 Hz, 2H), 6.99 (s, 1H), 5.03 (d, *J* = 14.4 Hz, 1H), 4.92



(d,  $J = 14.4$  Hz, 1H), 4.90 – 4.84 (m, 1H), 4.64 – 4.46 (m, 2H), 2.42 (s, 3H), 2.23 (s, 3H), 2.20 (s, 3H), 1.14 (d,  $J = 6.3$  Hz, 3H), 1.11 (d,  $J = 6.3$  Hz, 3H).  $^{13}\text{C}$  NMR (100 MHz,  $\text{CDCl}_3$ )  $\delta$  216.2, 165.3, 143.4, 142.1, 139.8, 138.9, 138.4, 137.2, 132.1, 129.4, 128.29, 101.3, 96.5, 78.9, 68.8, 48.5, 21.6, 21.5, 20.3, 20.3. **HRMS (ESI)**  $m/z$  Calcd for  $[\text{C}_{22}\text{H}_{24}\text{INO}_4\text{S}, \text{M} + \text{Na}]^+$ : 548.0363; Found: 548.0368.

**Optical Rotation:**  $[\alpha]^{25}_{\text{D}} -30.0$  ( $c = 1.0$ ,  $\text{CHCl}_3$ ). 90% *ee* (HPLC conditions: Chiralpak AS-H column, *n*-Hexane/*i*-PrOH = 90:10, flow rate = 1.0 mL/min, wavelength = 254 nm,  $t_{\text{R}} = 11.038$  min for minor isomer,  $t_{\text{R}} = 13.114$  min for major isomer).

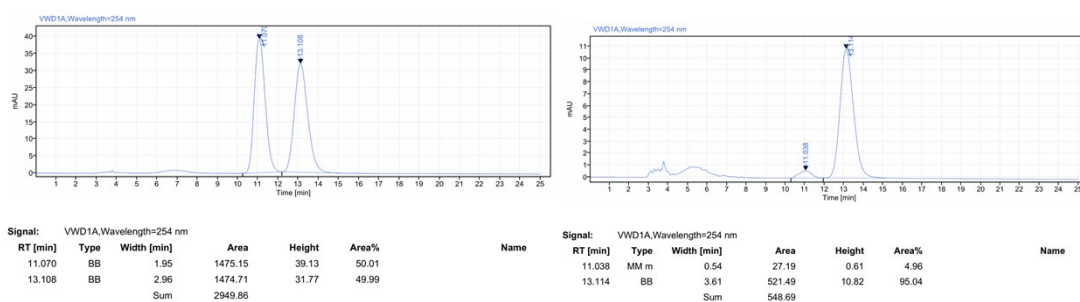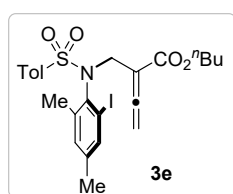

**3e.** (94% yield, Hexane-EtOAc = 5:1,  $R_f = 0.4$ ). Syrup.  $^1\text{H}$  NMR (400 MHz,  $\text{CDCl}_3$ )  $\delta$  7.77 (d,  $J = 8.3$  Hz, 2H), 7.51 (d,  $J = 0.9$  Hz, 1H), 7.28 (d,  $J = 8.3$  Hz, 2H), 6.99 (d,  $J = 0.9$  Hz, 1H), 5.05 (d,  $J = 14.5$  Hz, 1H), 4.94 (d,  $J = 14.5$  Hz, 1H), 4.63 – 4.47 (m, 2H), 3.99 (qt,  $J = 10.8, 6.7$  Hz, 2H), 2.42 (s, 3H), 2.23 (s, 3H), 2.20 (s, 3H), 1.52-1.45 (m, 6.8 Hz, 2H), 1.31-1.26 (m,  $J = 15.2, 7.5$  Hz, 2H), 0.88 (t,  $J = 7.4$  Hz, 3H).  $^{13}\text{C}$  NMR (100 MHz,  $\text{CDCl}_3$ )  $\delta$  216.2, 165.8, 143.4, 141.9, 139.8, 138.9, 138.3, 137.4, 132.0, 129.4, 128.3, 101.4, 96.3, 79.1, 65.2, 48.6, 30.4, 21.6, 20.3, 20.2, 19.0, 13.7. **HRMS (ESI)**  $m/z$  Calcd for  $[\text{C}_{24}\text{H}_{28}\text{INO}_4\text{S}, \text{M} + \text{Na}]^+$ : 576.0676; Found: 576.0680.

**Optical Rotation:**  $[\alpha]^{25}_{\text{D}} -32.0$  ( $c = 1.0$ ,  $\text{CHCl}_3$ ). 90% *ee* (HPLC conditions: Chiralpak AS-H column, *n*-Hexane/*i*-PrOH = 98:2, flow rate = 1.0 mL/min,

wavelength = 254 nm,  $t_R = 12.661$  min for minor isomer,  $t_R = 15.323$  min for major isomer).

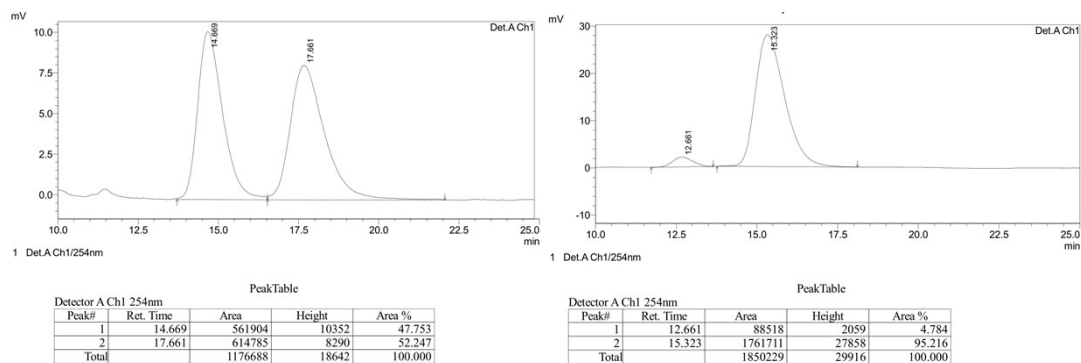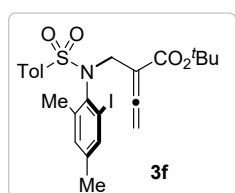

**3f** (94% yield, Hexane-EtOAc = 5:1,  $R_f = 0.4$ ). Syrup.  $^1\text{H NMR}$  (400 MHz,  $\text{CDCl}_3$ )  $\delta$  7.76 (d,  $J = 8.3$  Hz, 2H), 7.50 (dd,  $J = 1.4$ , 0.5 Hz, 1H), 7.27 (d,  $J = 8.3$  Hz, 2H), 6.99 (dd,  $J = 1.4$ , 0.5 Hz, 1H), 5.01 (d,  $J = 14.3$  Hz, 1H), 4.87 (d,  $J = 14.3$  Hz, 1H), 4.56 (d,  $J = 14.1$  Hz, 1H), 4.48 (d,  $J = 14.1$  Hz, 1H), 2.41 (s, 3H), 2.23 (s, 3H), 2.23 (s, 3H), 1.32 (s, 9H).  $^{13}\text{C NMR}$  (100 MHz,  $\text{CDCl}_3$ )  $\delta$  216.3, 164.8, 143.3, 142.2, 139.8, 138.9, 138.5, 137.4, 132.1, 129.3, 128.3, 101.1, 97.5, 81.2, 78.6, 48.5, 27.7, 21.5, 20.3, 20.3. **HRMS (ESI)**  $m/z$  Calcd for  $[\text{C}_{24}\text{H}_{28}\text{INO}_4\text{S}, \text{M} + \text{Na}]^+$ : 576.0676; Found: 576.0681.

**Optical Rotation:**  $[\alpha]_D^{25} -30.0$  ( $c = 1.0$ ,  $\text{CHCl}_3$ ). 92% *ee* (HPLC conditions: Chiralpak AD-H column, *n*-Hexane/*i*-PrOH = 80:20, flow rate = 1.0 mL/min, wavelength = 254 nm,  $t_R = 11.029$  min for minor isomer,  $t_R = 9.863$  min for major isomer).

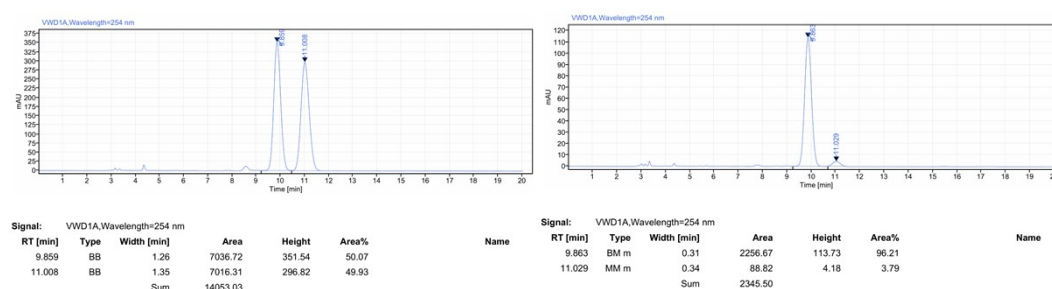

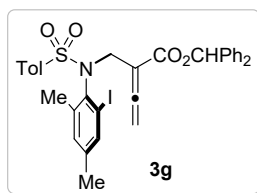

**3g** (85% yield, Hexane-EtOAc-Chlorobenzene = 7:1:1,  $R_f$  = 0.5). syrup.  $^1\text{H NMR}$  (400 MHz,  $\text{CDCl}_3$ )  $\delta$  7.66 (d,  $J$  = 8.0 Hz, 2H), 7.35 (s, 1H), 7.19-7.14 (m, 12H), 6.74 (s, 1H), 6.70 (s, 1H), 5.03 (d,  $J$  = 14.6 Hz, 1H), 4.92 (d,  $J$  = 14.6 Hz, 1H), 4.49 (s, 2H), 2.32 (s, 3H), 2.09 (s, 3H), 1.94 (s, 3H).  $^{13}\text{C NMR}$  (100 MHz,  $\text{CDCl}_3$ )  $\delta$  216.7, 164.8, 143.3, 141.9, 140.0, 139.7, 138.9, 138.3, 137.2, 132.0, 129.3, 128.3, 127.8, 127.7, 127.2, 126.9, 101.3, 96.1, 79.1, 77.3, 48.5, 21.5, 20.3, 20.0. **HRMS (ESI)**  $m/z$  Calcd for  $[\text{C}_{33}\text{H}_{30}\text{INO}_4\text{S}, \text{M} + \text{Na}]^+$ : 686.0832; Found: 686.0834.

**Optical Rotation:**  $[\alpha]_D^{25}$  -30.0 ( $c$  = 1.0,  $\text{CHCl}_3$ ). 92% *ee* (HPLC conditions: Chiralpak AD-H column, *n*-Hexane/*i*-PrOH = 80:20, flow rate = 1.0 mL/min, wavelength = 254 nm,  $t_R$  = 14.295 min for minor isomer,  $t_R$  = 16.424 min for major isomer).

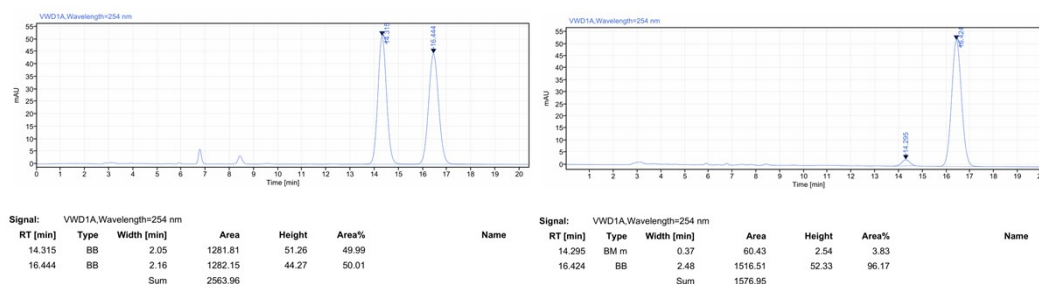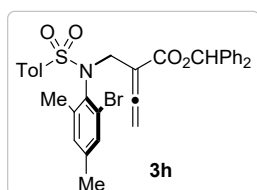

**3h** (92% yield, Hexane-EtOAc = 5:1,  $R_f$  = 0.3). Syrup.  $^1\text{H NMR}$  (400 MHz,  $\text{CDCl}_3$ )  $\delta$  7.63 (d,  $J$  = 7.8 Hz, 2H), 7.29 – 7.10 (m, 12H), 7.03 (s, 1H), 6.74 (s, 1H), 6.70 (s, 1H), 5.06 (d,  $J$  = 14.6 Hz, 1H), 4.92 (d,  $J$  = 14.6 Hz, 1H), 4.53 (d,  $J$  = 14.1 Hz, 1H), 4.40 (d,  $J$  = 14.1 Hz, 1H), 2.33 (s, 3H), 2.13 (s, 3H), 1.99 (s, 3H).  $^{13}\text{C NMR}$  (100 MHz,  $\text{CDCl}_3$ )  $\delta$  216.6, 164.9, 143.3, 142.8, 140.15, 139.7, 138.0, 133.8, 132.0, 131.2, 129.3, 128.4, 128.2, 127.9, 127.8, 127.2, 127.0, 125.0, 96.3, 79.3, 77.4, 48.3, 21.6, 20.7, 19.8. **HRMS (ESI)**  $m/z$  Calcd for  $[\text{C}_{33}\text{H}_{30}\text{BrNO}_4\text{S}, \text{M} + \text{Na}]^+$ : 638.0971, 640.0956; Found: 638.0976, 640.0958.

**Optical Rotation:**  $[\alpha]^{25}_D$  -8.5 ( $c = 0.5$ ,  $\text{CHCl}_3$ ). 93% *ee* (HPLC conditions: Chiralpak AD-H column, *n*-Hexane/*i*-PrOH = 80:20, flow rate = 1.0 mL/min, wavelength = 254 nm,  $t_R = 12.527$  min for minor isomer,  $t_R = 14.345$  min for major isomer).

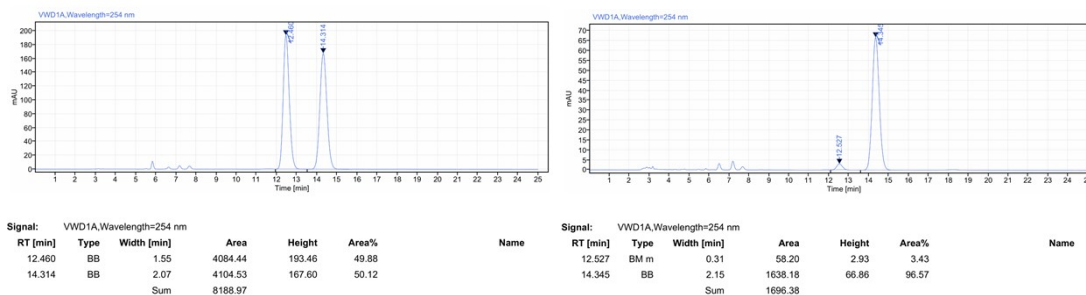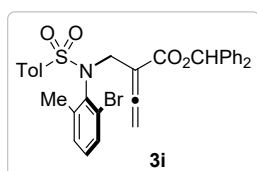

**3i** (84% yield, Hexane-EtOAc-Chlorobenzene = 7:1:1,  $R_f = 0.5$ ). Syrup.  $^1\text{H NMR}$  (400 MHz,  $\text{CDCl}_3$ )  $\delta$  7.74 (d,  $J = 7.8$  Hz, 2H), 7.41 – 7.23 (m, 13H), 7.05-6.98 (m, 2H), 6.80 (s, 1H), 5.14 (d,  $J = 14.7$  Hz, 1H), 4.98 (d,  $J = 14.7$  Hz, 1H), 4.64 (d,  $J = 14.1$  Hz, 1H), 4.51 (d,  $J = 14.1$  Hz, 1H), 2.42 (s, 3H), 2.13 (s, 3H).  $^{13}\text{C NMR}$  (100 MHz,  $\text{CDCl}_3$ )  $\delta$  216.5, 164.7, 143.5, 143.3, 140.0, 137.8, 136.4, 131.4, 130.2, 129.4, 129.3, 128.3, 128.1, 127.8, 127.7, 127.1, 126.9, 125.3, 96.1, 79.2, 77.4, 48.1, 21.5, 19.8. **HRMS (ESI)**  $m/z$  Calcd for  $[\text{C}_{32}\text{H}_{28}\text{BrNO}_4\text{S}, \text{M} + \text{Na}]^+$ : 624.0815, 626.0799; Found: 625.0811, 626.0804.

**Optical Rotation:**  $[\alpha]^{25}_D$  -10.6 ( $c = 0.5$ ,  $\text{CHCl}_3$ ). 90% *ee* (HPLC conditions: Chiralpak AD-H column, *n*-Hexane/*i*-PrOH = 80:20, flow rate = 1.0 mL/min, wavelength = 254 nm,  $t_R = 11.580$  min for minor isomer,  $t_R = 14.187$  min for major isomer).

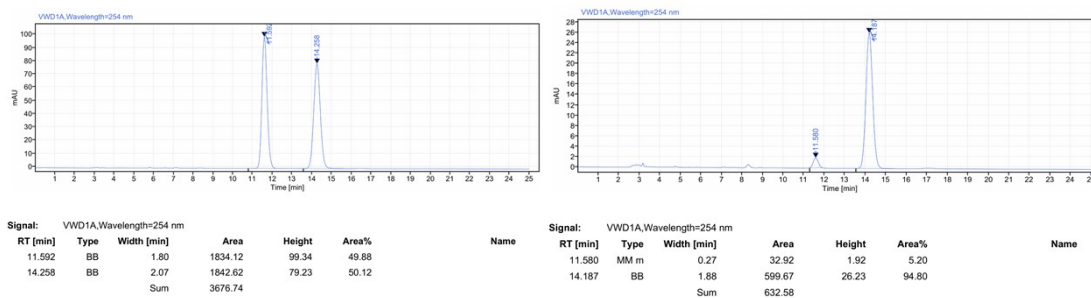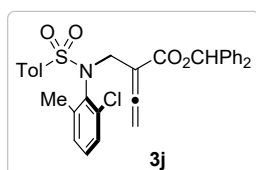

**3j** (91% yield, Hexane-EtOAc-Chlorobenzene = 7:1:1,  $R_f$  = 0.4). Syrup.  $^1\text{H NMR}$  (400 MHz,  $\text{CDCl}_3$ )  $\delta$  7.70 (d,  $J$  = 8.2 Hz, 2H), 7.33 – 7.21 (m, 12H), 7.12–7.03 (m, 2H), 7.01–6.99 (m, 1H), 6.79 (s, 1H), 5.13 (d,  $J$  = 14.6 Hz, 1H), 4.97 (d,  $J$  = 14.6 Hz, 1H), 4.66 (d,  $J$  = 14.0 Hz, 1H), 4.41 (d,  $J$  = 14.0 Hz, 1H), 2.41 (s, 3H), 2.13 (s, 3H).  $^{13}\text{C NMR}$  (100 MHz,  $\text{CDCl}_3$ )  $\delta$  216.4, 164.7, 143.4, 143.3, 140.0, 137.6, 135.0, 134.9, 129.6, 129.3, 129.1, 128.4, 128.0, 127.9, 127.8, 127.8, 127.1, 126.9, 96.1, 79.2, 77.4, 48.1, 21.5, 19.4. **HRMS (ESI)**  $m/z$  Calcd for  $[\text{C}_{32}\text{H}_{28}\text{ClNO}_4\text{S}, \text{M} + \text{Na}]^+$ : 580.1320, 582.1304; Found: 580.1325, 582.1308.

**Optical Rotation:**  $[\alpha]_D^{25}$  -5.4 ( $c$  = 0.25,  $\text{CHCl}_3$ ). 84% *ee* (HPLC conditions: Chiralpak AD-H column, *n*-Hexane/*i*-PrOH = 80:20, flow rate = 1.0 mL/min, wavelength = 254 nm,  $t_R$  = 11.567 min for minor isomer,  $t_R$  = 13.870 min for major isomer).

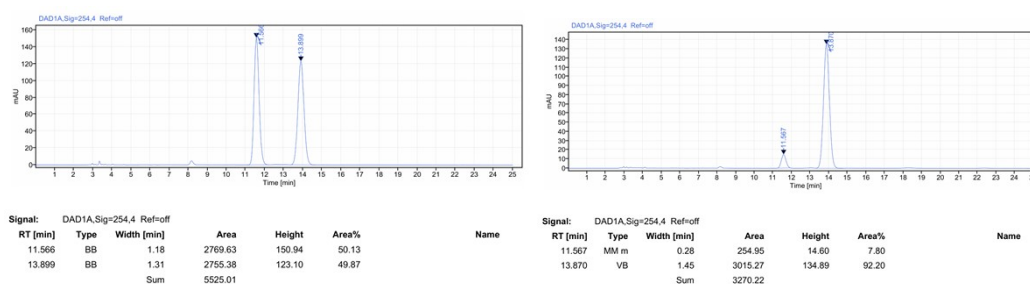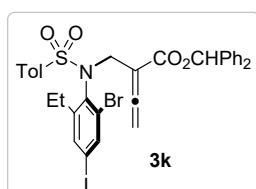

**3k** (98% yield, Hexane-EtOAc = 5:1,  $R_f$  = 0.3). Syrup.  $^1\text{H NMR}$  (400 MHz,  $\text{CDCl}_3$ )  $\delta$  7.85 – 7.67 (m, 3H), 7.37 – 7.22 (m, 13H), 6.80 (s, 1H), 5.15 (d,  $J$  = 14.8 Hz, 1H), 5.04 (d,  $J$  = 14.8 Hz, 1H).

14.8 Hz, 1H), 4.58 (d,  $J = 14.2$  Hz, 1H), 4.52 (d,  $J = 14.2$  Hz, 1H), 2.56 (dq,  $J = 15.1$ , 7.5 Hz, 1H), 2.43 (s, 3H), 2.31 (dq,  $J = 15.0$ , 7.5 Hz, 1H), 0.97 (t,  $J = 7.5$  Hz, 3H).  $^{13}\text{C}$  NMR (100 MHz,  $\text{CDCl}_3$ )  $\delta$  216.8, 164.7, 149.8, 143.7, 140.1, 139.9, 138.7, 138.0, 132.1, 129.4, 128.4, 127.9, 127.8, 127.3, 127.0, 123.0, 102.0, 95.9, 79.4, 77.5, 48.8, 25.3, 21.6, 14.0. **HRMS (ESI)**  $m/z$  Calcd for  $[\text{C}_{33}\text{H}_{29}\text{BrINO}_4\text{S}, \text{M} + \text{Na}]^+$ : 763.9938, 765.9922; Found: 763.9939, 769.9924.

**Optical Rotation:**  $[\alpha]_D^{25}$  -15.3 ( $c = 0.5$ ,  $\text{CHCl}_3$ ). 75% *ee* (HPLC conditions: Chiralpak AD-H column, *n*-Hexane/*i*-PrOH = 80:20, flow rate = 1.0 mL/min, wavelength = 254 nm,  $t_R = 12.590$  min for minor isomer,  $t_R = 11.311$  min for major isomer).

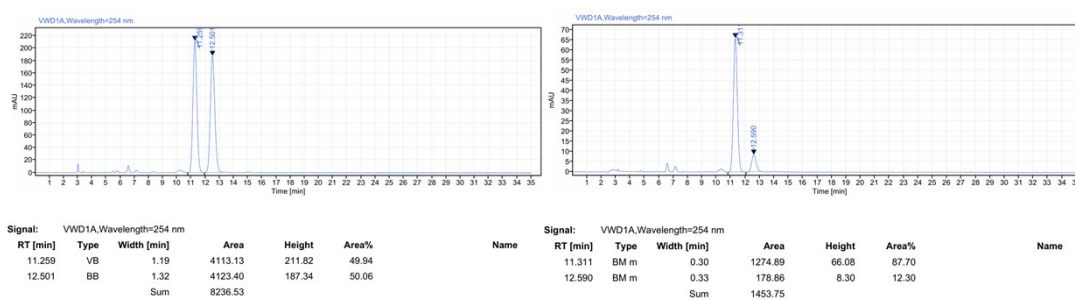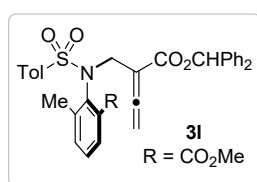

**3I** (72% yield, Hexane-EtOAc-Chlorobenzene = 7:1:1,  $R_f = 0.5$ ). Syrup.  $^1\text{H}$  NMR (400 MHz,  $\text{CDCl}_3$ )  $\delta$  7.63 (dd,  $J = 6.6$ , 2.8 Hz, 1H), 7.55 (d,  $J = 8.2$  Hz, 2H), 7.29-7.18 (m, 14H), 6.78 (s, 1H), 5.15 (d,  $J = 14.6$  Hz, 1H), 5.03 (d,  $J = 14.6$  Hz, 1H), 4.75 (d,  $J = 14.4$  Hz, 1H), 4.66 (d,  $J = 14.4$  Hz, 1H), 3.45 (s, 3H), 2.39 (s, 3H), 1.83 (s, 3H).  $^{13}\text{C}$  NMR (100 MHz,  $\text{CDCl}_3$ )  $\delta$  216.7, 166.6, 165.2, 142.9, 141.3, 140.2, 138.3, 136.5, 134.8, 132.4, 129.5, 129.3, 128.4, 128.3, 128.1, 127.8, 127.8, 127.5, 127.0, 96.9, 78.9, 51.8, 50.3, 21.5, 18.7. **HRMS (ESI)**  $m/z$  Calcd for  $[\text{C}_{34}\text{H}_{31}\text{NO}_6\text{S}, \text{M} + \text{Na}]^+$ : 604.1764; Found: 604.1767.

**Optical Rotation:**  $[\alpha]_D^{25}$  -45.0 ( $c = 1.0$ ,  $\text{CHCl}_3$ ). 82% *ee* (HPLC conditions:

Chiralpak AD-H column, *n*-Hexane/*i*-PrOH = 80:20, flow rate = 1.0 mL/min, wavelength = 254 nm,  $t_R$  = 26.212 min for minor isomer,  $t_R$  = 20.444 min for major isomer).

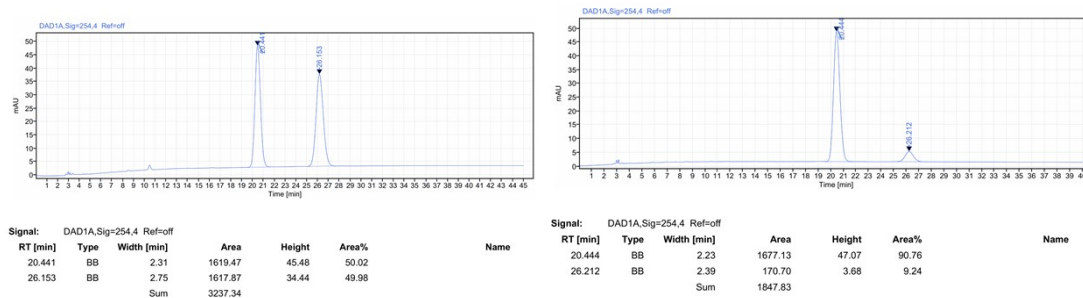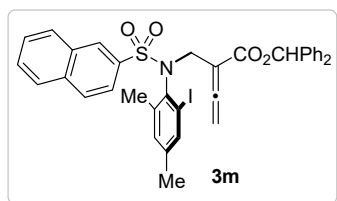

**3m** (98% yield, Hexane-EtOAc-Chlorobenzene = 7:1:1,  $R_f$  = 0.5). White solid. MP: 69-70 °C.  $^1\text{H NMR}$  (400 MHz,  $\text{CDCl}_3$ )  $\delta$  8.40 (s, 1H), 7.94 – 7.82 (m, 4H), 7.26-7.53 (m, 2H), 7.40 (d,  $J$  = 1.4 Hz, 1H), 7.25 – 7.19 (m, 10H), 6.85 – 6.79 (m, 1H), 6.75 (s, 1H), 5.08 (d,  $J$  = 14.7 Hz, 1H), 4.97 (d,  $J$  = 14.7 Hz, 1H), 4.63 (s, 2H), 2.16 (s, 3H), 1.99 (s, 3H).  $^{13}\text{C NMR}$  (100 MHz,  $\text{CDCl}_3$ )  $\delta$  216.8, 164.9, 142.0, 140.1, 140.1, 139.9, 139.0, 138.3, 137.1, 135.0, 132.3, 132.2, 129.8, 129.5, 129.4, 128.9, 128.6, 128.4, 127.9, 127.9, 127.8, 127.3, 127.0, 124.1, 101.4, 96.1, 79.3, 77.4, 48.8, 20.5, 20.2. **HRMS (ESI)**  $m/z$  Calcd for  $[\text{C}_{36}\text{H}_{30}\text{INO}_4\text{S}, \text{M} + \text{Na}]^+$ : 722.0832; Found: 722.0833.

**Optical Rotation:**  $[\alpha]_D^{25}$  -44.0 ( $c$  = 1.0,  $\text{CHCl}_3$ ). 89% *ee* (HPLC conditions: Chiralpak AD-H column, *n*-Hexane/*i*-PrOH = 80:20, flow rate = 1.0 mL/min, wavelength = 254 nm,  $t_R$  = 21.687 min for minor isomer,  $t_R$  = 29.458 min for major isomer).

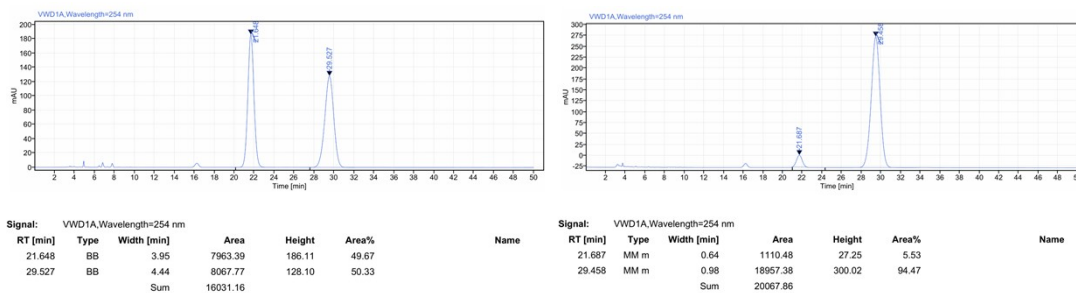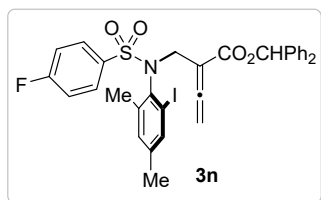

**3n** (90% yield, Hexane-EtOAc-Chlorobenzene = 7:1:1,  $R_f$  = 0.5). White solid. MP: 69-70 °C.  $^1\text{H NMR}$  (400 MHz,  $\text{CDCl}_3$ )  $\delta$  7.88-7.84 (m, 2H), 7.43 (s, 1H), 7.30 – 7.19 (m, 10H), 7.10 (t,  $J$  = 8.6 Hz, 2H), 6.85 (s, 1H), 6.78 (s, 1H), 5.08 (d,  $J$  = 14.7 Hz, 1H), 4.97 (d,  $J$  = 14.7 Hz, 1H), 4.59 (d,  $J$  = 14.2 Hz, 1H), 4.54 (d,  $J$  = 14.2 Hz, 1H), 2.19 (s, 3H), 2.04 (s, 3H).  $^{13}\text{C NMR}$  (100 MHz,  $\text{CDCl}_3$ )  $\delta$  216.7, 165.2 (d,  $^1J_{\text{C-F}}$  = 252.7 Hz), 164.8, 141.9, 140.0, 140.0, 138.9, 137.3 (d,  $^4J_{\text{C-F}}$  = 3.0 Hz), 136.9, 132.2, 131.0 (d,  $^3J_{\text{C-F}}$  = 9.3 Hz), 128.3, 127.9, 127.8, 127.2, 126.9, 115.8 (d,  $^2J_{\text{C-F}}$  = 22.4 Hz), 101.0, 95.9, 79.2, 77.4, 48.8, 20.6, 20.0.  $^{19}\text{F NMR}$  (376 MHz,  $\text{CDCl}_3$ )  $\delta$  -105.53. **HRMS (ESI)**  $m/z$  Calcd for  $[\text{C}_{32}\text{H}_{27}\text{FINO}_4\text{S}, \text{M} + \text{Na}]^+$ : 690.0582; Found: 690.0587.

**Optical Rotation:**  $[\alpha]_{\text{D}}^{25}$  -30.0 ( $c$  = 1.0,  $\text{CHCl}_3$ ). 84%  $ee$  (HPLC conditions: Chiralpak AD-H column,  $n$ -Hexane/ $i$ -PrOH = 90:10, flow rate = 1.0 mL/min, wavelength = 254 nm,  $t_{\text{R}}$  = 15.896 min for minor isomer,  $t_{\text{R}}$  = 17.224 min for major isomer).

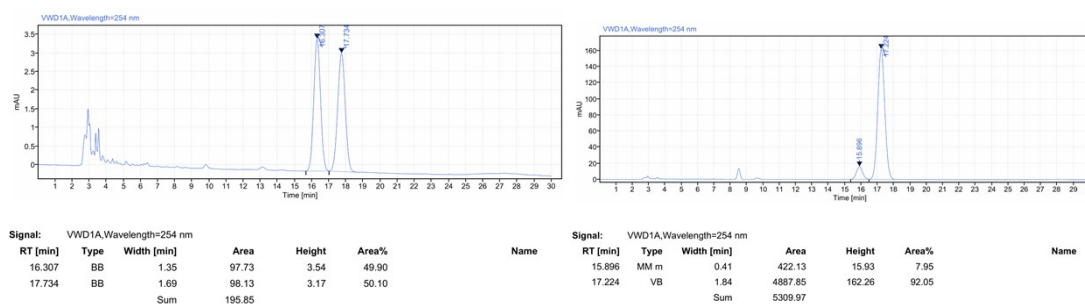



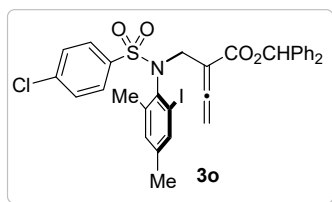

**3o** (98% yield, Hexane-EtOAc-Chlorobenzene = 7:1:1,  $R_f = 0.5$ ). White solid. MP: 139-140 °C.  $^1\text{H NMR}$  (400 MHz,  $\text{CDCl}_3$ )  $\delta$  7.82 (d,  $J = 8.6$  Hz, 2H), 7.45 (s, 1H), 7.43 (d,  $J = 8.6$  Hz, 2H), 7.33 – 7.25 (m, 10H), 6.88 (s, 1H), 6.81 (s, 1H), 5.10 (d,  $J = 14.7$  Hz, 1H), 4.99 (d,  $J = 14.7$  Hz, 1H), 4.63 (d,  $J = 14.1$  Hz, 1H), 4.56 (d,  $J = 14.1$  Hz, 1H), 2.21 (s, 3H), 2.05 (s, 3H).  $^{13}\text{C NMR}$  (100 MHz,  $\text{CDCl}_3$ )  $\delta$  216.7, 164.8, 141.9, 140.0, 139.9, 139.7, 139.0, 138.9, 136.8, 132.2, 129.8, 128.9, 128.3, 127.9, 127.8, 127.3, 126.9, 101.1, 95.9, 77.4, 48.9, 20.4, 20.0. **HRMS (ESI)**  $m/z$  Calcd for  $[\text{C}_{32}\text{H}_{27}\text{ClINO}_4\text{S}, \text{M} + \text{Na}]^+$ : 706.0286; Found: 706.0286.

**Optical Rotation:**  $[\alpha]_D^{25}$  -33.0 ( $c = 1.0$ ,  $\text{CHCl}_3$ ). 88% *ee* (HPLC conditions: Chiralpak AD-H column, *n*-Hexane/*i*-PrOH = 90:10, flow rate = 1.0 mL/min, wavelength = 254 nm,  $t_R = 18.899$  min for minor isomer,  $t_R = 20.709$  min for major isomer).

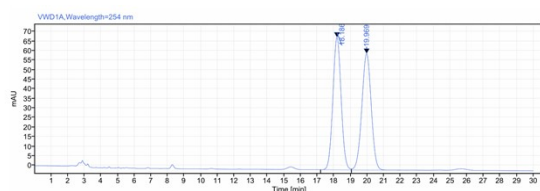

| Signal: VWD1A.Wavelength=254 nm |      |             |         |        |       |
|---------------------------------|------|-------------|---------|--------|-------|
| RT [min]                        | Type | Width [min] | Area    | Height | Area% |
| 18.186                          | BV   | 1.85        | 2382.74 | 69.18  | 49.92 |
| 19.969                          | VB   | 2.96        | 2390.02 | 60.76  | 50.08 |
| Sum                             |      |             | 4772.77 |        |       |

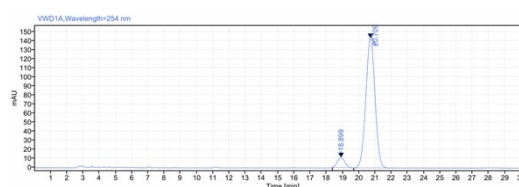

| Signal: VWD1A.Wavelength=254 nm |      |             |         |        |       |
|---------------------------------|------|-------------|---------|--------|-------|
| RT [min]                        | Type | Width [min] | Area    | Height | Area% |
| 18.899                          | MM m | 0.52        | 357.49  | 10.95  | 5.95  |
| 20.709                          | BB   | 2.45        | 5651.63 | 143.25 | 94.05 |
| Sum                             |      |             | 6009.12 |        |       |

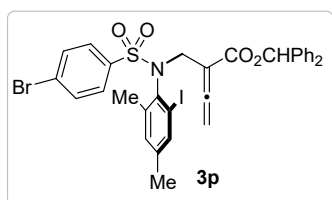

**3p** (92% yield, Hexane-EtOAc-Chlorobenzene = 7:1:1,  $R_f = 0.4$ ). White solid. MP: 139-149 °C.  $^1\text{H NMR}$  (400 MHz,  $\text{CDCl}_3$ )  $\delta$  7.75 (d,  $J = 8.5$  Hz, 2H), 7.59 (d,  $J = 8.5$  Hz, 2H), 7.45 (s, 1H), 7.34 – 7.22 (m, 10H), 6.88 (s, 1H), 6.81 (s, 1H), 5.09 (d,  $J = 14.7$  Hz, 1H), 4.99 (d,  $J = 14.7$  Hz, 1H), 4.63 (d,  $J = 14.1$  Hz, 1H), 4.56 (d,  $J = 14.1$  Hz, 1H), 2.21 (s, 3H), 2.05 (s, 3H).  $^{13}\text{C NMR}$  (100 MHz,  $\text{CDCl}_3$ )  $\delta$  216.7, 164.8, 141.9, 140.2, 140.0, 139.9, 138.9, 136.7, 132.2, 131.9, 129.9, 128.3, 127.9, 127.8, 127.5, 127.3, 126.9, 101.1, 95.8, 79.2, 77.4, 48.9, 20.4, 20.0.

**HRMS (ESI) m/z** Calcd for  $[C_{32}H_{27}BrINO_4S, M + Na]^+$ : 749.9781, 751.9765; Found: 749.9785, 751.9761.

**Optical Rotation:**  $[\alpha]^{25}_D$  -32.0 ( $c = 1.0$ ,  $CHCl_3$ ). 90% *ee* (HPLC conditions: Chiralpak AD-H column, *n*-Hexane/*i*-PrOH = 90:10, flow rate = 1.0 mL/min, wavelength = 254 nm,  $t_R = 23.170$  min for minor isomer,  $t_R = 25.031$  min for major isomer).

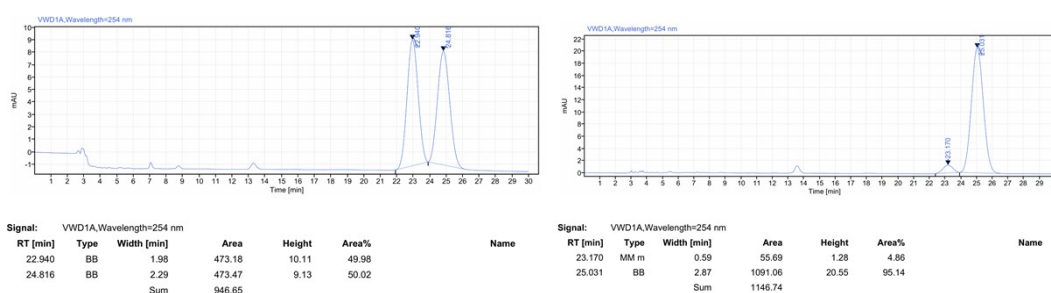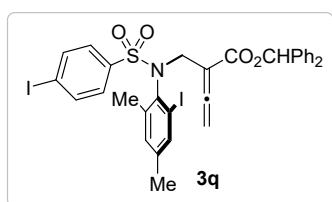

**3q** (95% yield, Hexane-EtOAc-Chlorobenzene = 7:1:1,  $R_f = 0.4$ ). White solid. MP: 139-140 °C.  $^1H$  NMR (400 MHz,  $CDCl_3$ )  $\delta$  7.81 (d,  $J = 8.5$  Hz, 2H), 7.59 (d,  $J = 8.5$  Hz, 2H), 7.45 (s, 1H), 7.34 – 7.25 (m, 10H), 6.87 (s, 1H), 6.80 (s, 1H), 5.09 (d,  $J = 14.7$  Hz, 1H), 4.98 (d,  $J = 14.7$  Hz, 1H), 4.62 (d,  $J = 14.1$  Hz, 1H), 4.55 (d,  $J = 14.1$  Hz, 1H), 2.21 (s, 3H), 2.04 (s, 3H).  $^{13}C$  NMR (100 MHz,  $CDCl_3$ )  $\delta$  216.7, 164.8, 141.9, 140.9, 140.0, 139.9, 138.9, 137.9, 136.7, 132.2, 129.8, 128.3, 127.9, 127.8, 127.3, 126.9, 101.2, 100.0, 95.9, 79.2, 77.4, 48.9, 20.4, 20.0. **HRMS (ESI) m/z** Calcd for  $[C_{32}H_{27}I_2NO_4S, M + Na]^+$ : 797.9642; Found: 797.9647.

**Optical Rotation:**  $[\alpha]^{25}_D$  -13.0 ( $c = 1.0$ ,  $CHCl_3$ ). 85% *ee* (HPLC conditions: Chiralpak AD-H column, *n*-Hexane/*i*-PrOH = 80:20, flow rate = 1.0 mL/min, wavelength = 254 nm,  $t_R = 24.642$  min for minor isomer,  $t_R = 27.598$  min for major isomer).

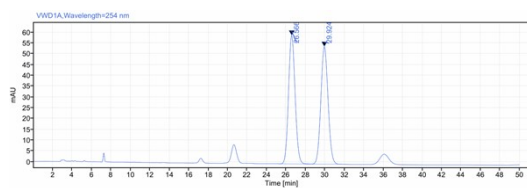

| RT [min] | Type | Width [min] | Area    | Height | Area% | Name |
|----------|------|-------------|---------|--------|-------|------|
| 26.566   | BB   | 3.17        | 2802.16 | 59.64  | 49.95 |      |
| 29.924   | BB   | 3.12        | 2807.48 | 54.50  | 50.05 |      |
| Sum      |      |             | 5609.64 |        |       |      |

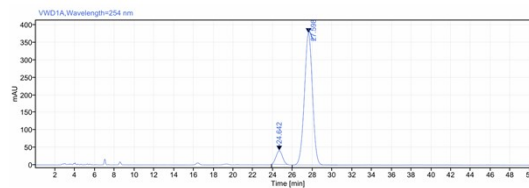

| RT [min] | Type | Width [min] | Area     | Height | Area% | Name |
|----------|------|-------------|----------|--------|-------|------|
| 24.642   | MM m | 0.71        | 1760.33  | 39.05  | 7.60  |      |
| 27.598   | BB   | 4.57        | 2139.192 | 377.17 | 92.40 |      |
| Sum      |      |             | 23152.25 |        |       |      |

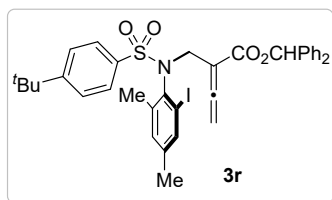

**3r** (97% yield, Hexane-EtOAc-Chlorobenzene = 7:1:1,  $R_f$  = 0.4). Syrup.  $^1\text{H NMR}$  (400 MHz,  $\text{CDCl}_3$ )  $\delta$  7.70 (d,  $J$  = 8.6 Hz, 2H), 7.39 (d,  $J$  = 8.6 Hz, 2H), 7.35 (s, 1H), 7.24 – 7.13 (m, 10H), 6.75 (s, 1H), 6.71 (s, 1H), 5.05 (d,  $J$  = 14.6 Hz, 1H), 4.94 (d,  $J$  = 14.6 Hz, 1H), 4.50 (s, 2H), 2.11 (s, 3H), 1.95 (s, 3H), 1.25 (s, 9H).  $^{13}\text{C NMR}$  (100 MHz,  $\text{CDCl}_3$ )  $\delta$  216.8, 164.8, 156.5, 142.0, 140.1, 140.0, 139.7, 138.9, 138.1, 137.2, 132.1, 128.3, 128.1, 127.8, 127.7, 127.2, 126.9, 125.7, 101.0, 96.3, 79.2, 77.4, 48.5, 35.1, 31.1, 20.3, 20.1. **HRMS (ESI)**  $m/z$  Calcd for  $[\text{C}_{36}\text{H}_{36}\text{INO}_4\text{S}, \text{M} + \text{Na}]^+$ : 728.1302; Found: 728.1306.

**Optical Rotation:**  $[\alpha]_D^{25}$  -21.6 ( $c$  = 0.5,  $\text{CHCl}_3$ ). 92%  $ee$  (HPLC conditions: Chiralpak OD-H column,  $n$ -Hexane/ $i$ -PrOH = 90:10, flow rate = 1.0 mL/min, wavelength = 254 nm,  $t_R$  = 9.699 min for minor isomer,  $t_R$  = 11.065 min for major isomer).

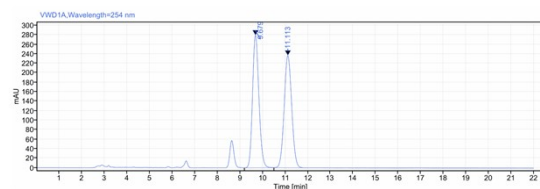

| RT [min] | Type | Width [min] | Area     | Height | Area% | Name |
|----------|------|-------------|----------|--------|-------|------|
| 9.679    | BB   | 1.30        | 5475.81  | 279.22 | 49.99 |      |
| 11.113   | BB   | 1.52        | 5477.56  | 238.56 | 50.01 |      |
| Sum      |      |             | 10953.37 |        |       |      |

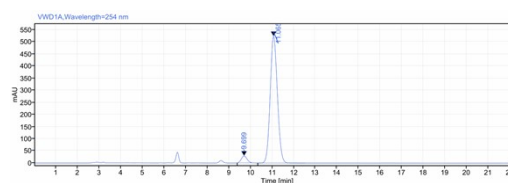

| RT [min] | Type | Width [min] | Area     | Height | Area% | Name |
|----------|------|-------------|----------|--------|-------|------|
| 9.659    | MM m | 0.29        | 518.69   | 28.22  | 4.11  |      |
| 11.065   | BB   | 2.20        | 12114.93 | 522.85 | 95.89 |      |
| Sum      |      |             | 12633.62 |        |       |      |

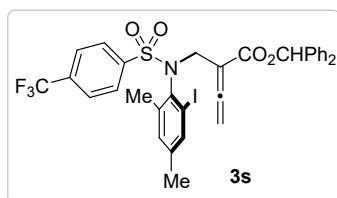

**3s** (90% yield, Hexane-EtOAc-Chlorobenzene = 7:1:1,  $R_f$  = 0.5). White solid. MP: 138-139 °C.  $^1\text{H NMR}$  (400 MHz,  $\text{CDCl}_3$ )  $\delta$  8.01 (d,  $J$  = 8.1 Hz, 2H), 7.72 (d,  $J$  = 8.1 Hz, 2H), 7.35 (s, 1H), 7.24 – 7.13 (m, 10H), 6.75 (s, 1H), 6.71 (s, 1H), 5.05 (d,  $J$  = 14.6 Hz, 1H), 4.94 (d,  $J$  = 14.6 Hz, 1H), 4.50 (s, 2H), 2.11 (s, 3H), 1.95 (s, 3H), 1.25 (s, 9H).  $^{13}\text{C NMR}$  (100 MHz,  $\text{CDCl}_3$ )  $\delta$  216.8, 164.8, 156.5, 142.0, 140.1, 140.0, 139.7, 138.9, 138.1, 137.2, 132.1, 128.3, 128.1, 127.8, 127.7, 127.2, 126.9, 125.7, 101.0, 96.3, 79.2, 77.4, 48.5, 35.1, 31.1, 20.3, 20.1. **HRMS (ESI)**  $m/z$  Calcd for  $[\text{C}_{36}\text{H}_{36}\text{F}_3\text{INO}_4\text{S}, \text{M} + \text{Na}]^+$ : 761.1302; Found: 761.1306.

Hz, 2H), 7.45 (s, 1H), 7.35-7.26 (m, 10H), 6.89 (s, 1H), 6.80 (s, 1H), 5.09 (d,  $J = 14.8$  Hz, 1H), 4.98 (d,  $J = 14.8$  Hz, 1H), 4.66 (d,  $J = 14.1$  Hz, 1H), 4.58 (d,  $J = 14.1$  Hz, 1H), 2.22 (s, 3H), 2.05 (s, 3H).  $^{13}\text{C}$  NMR (100 MHz,  $\text{CDCl}_3$ )  $\delta$  216.8, 164.8, 144.5, 141.9, 140.2, 139.9, 139.9, 139.0, 136.5, 134.2 (q,  $^2J_{\text{C-F}} = 32.8$  Hz), 132.3, 128.9, 128.3, 127.9, 127.8, 127.30, 126.9, 125.8 (q,  $^3J_{\text{C-F}} = 3.3$  Hz), 123.4 (q,  $^1J_{\text{C-F}} = 271.2$  Hz), 101.0, 95.8, 79.2, 77.5, 49.1, 20.4, 20.0.  $^{19}\text{F}$  NMR (376 MHz,  $\text{CDCl}_3$ )  $\delta$  -62.85. **HRMS (ESI)**  $m/z$  Calcd for  $[\text{C}_{33}\text{H}_{27}\text{F}_3\text{INO}_4\text{S}, \text{M} + \text{Na}]^+$ : 740.0550; Found: 740.0552.

**Optical Rotation:**  $[\alpha]_{\text{D}}^{25}$  -28 ( $c = 1.0$ ,  $\text{CHCl}_3$ ). 85% *ee* (HPLC conditions: Chiralpak AD-H column, *n*-Hexane/*i*-PrOH = 80:20, flow rate = 1.0 mL/min, wavelength = 254 nm,  $t_{\text{R}} = 16.342$  min for minor isomer,  $t_{\text{R}} = 13.669$  min for major isomer).

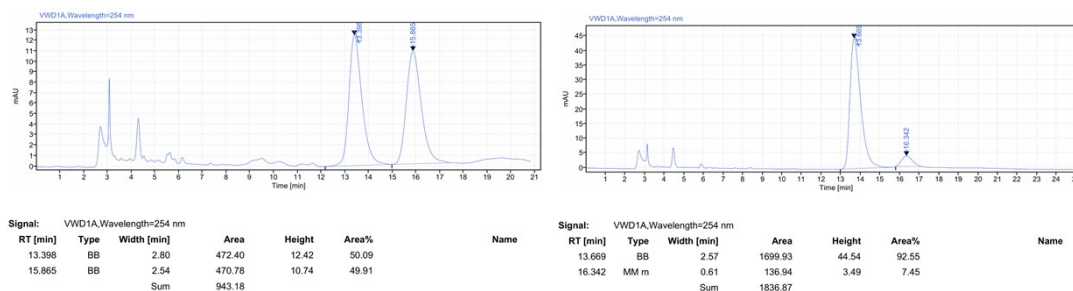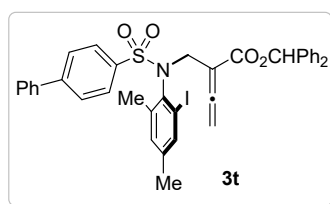

**3t** (93% yield, Hexane-EtOAc-Chlorobenzene = 7:1:1,  $R_{\text{f}} = 0.5$ ). White solid. MP: 77-78 °C.  $^1\text{H}$  NMR (400 MHz,  $\text{CDCl}_3$ )  $\delta$  7.93 (d,  $J = 8.3$  Hz, 2H), 7.67 (d,  $J = 8.3$  Hz, 2H), 7.62 (d,  $J = 7.5$  Hz, 2H), 7.51 – 7.39 (m, 4H), 7.27-7.22 (m, 10H), 6.86 (s, 1H), 6.80 (s, 1H), 5.13 (d,  $J = 14.7$  Hz, 1H), 5.01 (d,  $J = 14.7$  Hz, 1H), 4.63 (s, 2H), 2.20 (s, 3H), 2.06 (s, 3H).  $^{13}\text{C}$  NMR (100 MHz,  $\text{CDCl}_3$ )  $\delta$  216.8, 164.8, 145.4, 142.0, 140.0, 139.8, 139.8, 139.4, 138.9, 137.1, 132.1, 129.0, 128.8, 128.3, 128.3, 127.8, 127.7, 127.3, 127.3, 127.2, 126.9, 101.2, 96.1, 79.2, 77.4, 48.7, 20.4, 20.1. **HRMS (ESI)**  $m/z$  Calcd for  $[\text{C}_{38}\text{H}_{32}\text{INO}_4\text{S}, \text{M} + \text{Na}]^+$ : 748.0989; Found: 748.0991.

**Optical Rotation:**  $[\alpha]_D^{25}$  -31.0 ( $c = 1.0$ ,  $\text{CHCl}_3$ ). 95% *ee* (HPLC conditions: Chiralpak AD-H column, *n*-Hexane/*i*-PrOH = 90:10, flow rate = 1.0 mL/min, wavelength = 254 nm,  $t_R = 37.085$  min for minor isomer,  $t_R = 39.892$  min for major isomer).

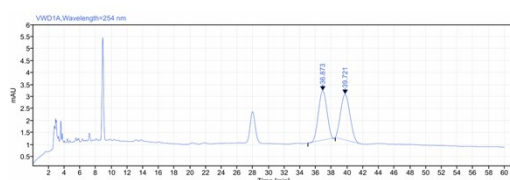

| RT [min] | Type | Width [min] | Area   | Height | Area% | Name |
|----------|------|-------------|--------|--------|-------|------|
| 36.873   | MM m | 0.88        | 152.85 | 2.05   | 49.25 |      |
| 39.721   | MM m | 0.97        | 157.48 | 1.90   | 50.75 |      |
| Sum      |      |             | 310.33 |        |       |      |

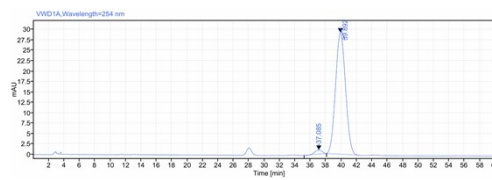

| RT [min] | Type | Width [min] | Area    | Height | Area% | Name |
|----------|------|-------------|---------|--------|-------|------|
| 37.085   | MM m | 0.73        | 58.37   | 0.94   | 2.18  |      |
| 39.892   | MM m | 1.39        | 2622.29 | 29.17  | 97.82 |      |
| Sum      |      |             | 2680.66 |        |       |      |

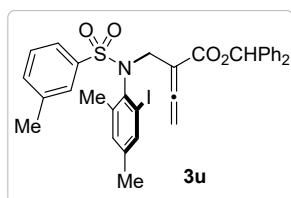

**3u** (83% yield). Syrup.  $^1\text{H NMR}$  (400 MHz,  $\text{CDCl}_3$ )  $\delta$  7.68 (s, 1H), 7.66-7.64 (m, 1H), 7.43 (s, 1H), 7.36 – 7.31 (m, 2H), 7.30 – 7.22 (m, 10H), 6.83 (s, 1H), 6.77 (s, 1H), 5.12 (d,  $J = 14.6$  Hz, 1H), 5.00 (d,  $J = 14.6$  Hz, 1H), 4.57 (s, 2H), 2.37 (s, 3H), 2.18 (s, 3H), 2.02 (s, 3H).  $^{13}\text{C NMR}$  (100 MHz,  $\text{CDCl}_3$ )  $\delta$  216.8, 164.8, 142.0, 141.0, 140.0, 140.0, 139.8, 138.9, 138.9, 137.1, 133.4, 132.1, 128.7, 128.6, 128.3, 127.8, 127.7, 127.2, 126.9, 125.3, 101.1, 96.1, 79.2, 77.3, 48.6, 21.3, 20.4, 20.1. **HRMS (ESI)**  $m/z$  Calcd for  $[\text{C}_{33}\text{H}_{30}\text{INO}_4\text{S}, \text{M} + \text{Na}]^+$ : 686.0832; Found: 686.0837.

**Optical Rotation:**  $[\alpha]_D^{25}$  -45.0 ( $c = 1.0$ ,  $\text{CHCl}_3$ ). 93% *ee* (HPLC conditions: Chiralpak AD-H column, *n*-Hexane/*i*-PrOH = 80:20, flow rate = 1.0 mL/min, wavelength = 254 nm,  $t_R = 8.465$  min for minor isomer,  $t_R = 9.646$  min for major isomer).

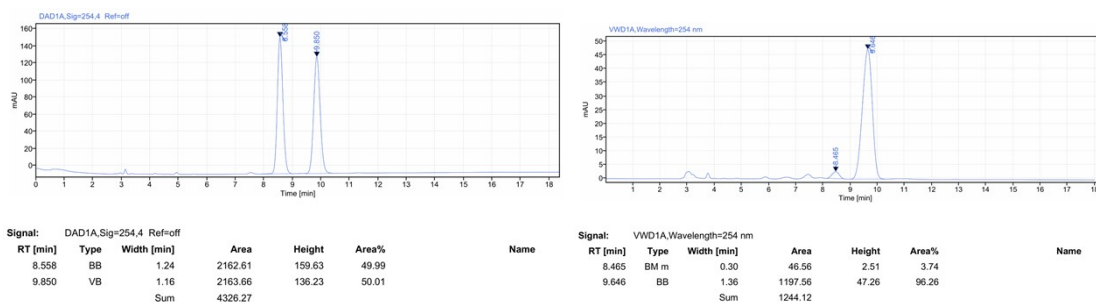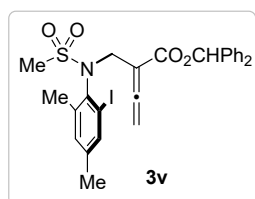

**3v** (90% yield, Hexane-EtOAc = 5:1,  $R_f$  = 0.3). White solid.

MP: 134-135 °C.  $^1\text{H NMR}$  (400 MHz,  $\text{CDCl}_3$ )  $\delta$  7.42 (s, 1H), 7.34 – 7.12 (m, 10H), 6.89 (s, 1H), 6.84 (s, 1H), 4.90 (d,  $J$  = 14.7 Hz, 1H), 4.78 (d,  $J$  = 14.7 Hz, 1H), 4.64 (d,  $J$  = 14.2 Hz, 1H), 4.02 (d,  $J$  = 14.2 Hz, 1H), 3.26 (s, 3H), 2.22 (s, 3H), 2.16 (s, 3H).  $^{13}\text{C NMR}$  (100 MHz,  $\text{CDCl}_3$ )  $\delta$  216.6, 165.4, 140.9, 140.0, 134.0, 139.8, 138.4, 137.2, 132.5, 128.4, 128.4, 128.0, 127.9, 127.6, 126.9, 103.6, 95.5, 78.8, 77.6, 48.9, 42.7, 20.4, 19.9.

$^{13}\text{C NMR}$  (100 MHz,  $\text{CDCl}_3$ )  $\delta$  216.6, 165.4, 140.9, 140.0, 134.0, 139.8, 138.4, 137.2, 132.5, 128.4, 128.4, 128.0, 127.9, 127.6, 126.9, 103.6, 95.5, 78.8, 77.6, 48.9, 42.7, 20.4, 19.9. **HRMS (ESI)**  $m/z$  Calcd for  $[\text{C}_{27}\text{H}_{26}\text{INO}_4\text{S}, \text{M} + \text{Na}]^+$ : 610.0519; Found: 610.0524.

**Optical Rotation:**  $[\alpha]_D^{25}$  -5.0 ( $c$  = 1.0,  $\text{CHCl}_3$ ). 97% *ee* (HPLC conditions: Chiralpak AD-H column, *n*-Hexane/*i*-PrOH = 70:30, flow rate = 1.0 mL/min, wavelength = 254 nm,  $t_R$  = 17.561 min for minor isomer,  $t_R$  = 11.438 min for major isomer).

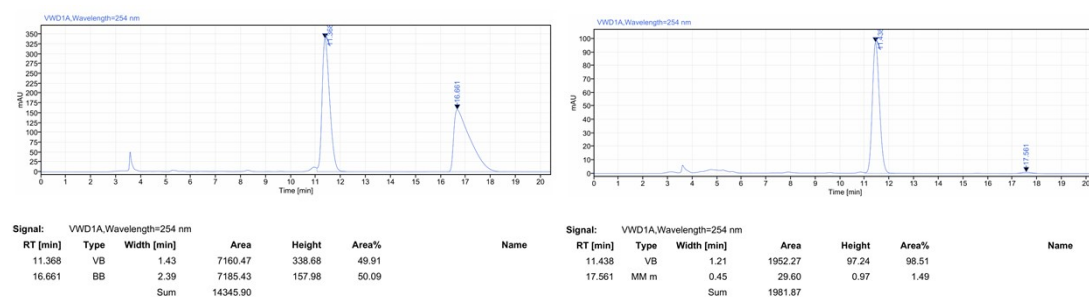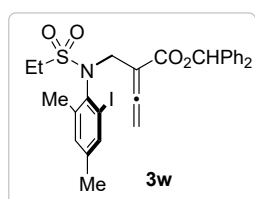

**3w** (97% yield, Hexane-EtOAc = 5:1,  $R_f$  = 0.4). White solid.

MP: 114-115 °C.  $^1\text{H NMR}$  (400 MHz,  $\text{CDCl}_3$ )  $\delta$  7.41 (s, 1H), 7.33 – 7.13 (m, 10H), 6.87 (s, 1H), 6.81 (s, 1H), 4.90 (d,  $J$  = 14.7 Hz, 1H), 4.79 (d,  $J$  = 14.7 Hz, 1H), 4.61 (d,  $J$  = 14.0 Hz,

1H), 4.07 (d,  $J = 14.0$  Hz, 1H), 3.48 (dq,  $J = 14.7, 7.4$  Hz, 1H), 3.39 (dq,  $J = 14.7, 7.4$  Hz, 1H), 2.23 (s, 3H), 2.14 (s, 3H), 1.35 (t,  $J = 7.4$  Hz, 3H).  $^{13}\text{C}$  NMR (100 MHz,  $\text{CDCl}_3$ )  $\delta$  216.8, 165.3, 141.2, 140.0, 139.9, 139.9, 138.4, 137.1, 132.5, 128.4, 128.4, 128.0, 127.9, 127.5, 126.9, 103.5, 95.6, 78.8, 77.5, 49.9, 48.9, 20.4, 20.0, 8.1. **HRMS (ESI)**  $m/z$  Calcd for  $[\text{C}_{28}\text{H}_{28}\text{INO}_4\text{S}, \text{M} + \text{Na}]^+$ : 624.0676; Found: 624.0672.

**Optical Rotation:**  $[\alpha]^{25}_{\text{D}} -4$  ( $c = 1.0, \text{CHCl}_3$ ). 97% *ee* (HPLC conditions: Chiralpak AD-H column, *n*-Hexane/*i*-PrOH = 70:30, flow rate = 1.0 mL/min, wavelength = 254 nm,  $t_{\text{R}} = 16.322$  min for minor isomer,  $t_{\text{R}} = 9.050$  min for major isomer).

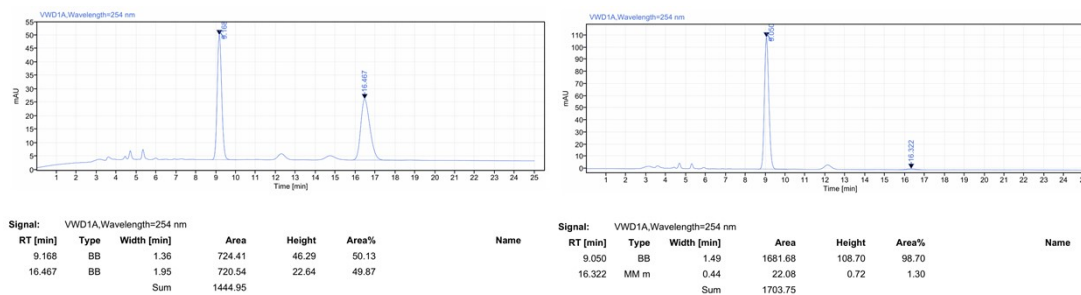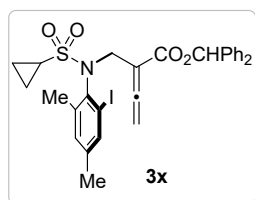

**3x** (95% yield, Hexane-EtOAc = 5:1,  $R_f = 0.3$ ). White solid. MP: 96-97 °C.  $^1\text{H}$  NMR (400 MHz,  $\text{CDCl}_3$ )  $\delta$  7.51 (d,  $J = 0.8$  Hz, 1H), 7.38 – 7.23 (m, 10H), 6.91 (d,  $J = 0.8$  Hz, 1H), 6.86 (s, 1H), 4.98 (s, 2H), 4.65 (d,  $J = 14.0$  Hz, 1H), 4.37 (d,  $J = 14.0$  Hz, 1H), 2.93-2.86 (m, 1H), 2.25 (s, 3H), 2.22 (s, 3H), 1.31 – 1.23 (m, 1H), 1.21 – 1.14 (m, 1H), 1.10 – 1.01 (m, 1H), 1.0 – 0.94 (m, 1H).  $^{13}\text{C}$  NMR (100 MHz,  $\text{CDCl}_3$ )  $\delta$  216.7, 165.0, 141.2, 140.0, 139.9, 139.8, 138.5, 137.2, 132.3, 128.4, 128.3, 127.9, 127.8, 127.3, 126.9, 103.1, 95.8, 78.9, 77.4, 48.8, 32.2, 20.4, 20.0, 7.2, 6.5. **HRMS (ESI)**  $m/z$  Calcd for  $[\text{C}_{29}\text{H}_{28}\text{INO}_4\text{S}, \text{M} + \text{Na}]^+$ : 636.0676; Found: 636.0677.

**Optical Rotation:**  $[\alpha]^{25}_{\text{D}} -3.0$  ( $c = 1.0, \text{CHCl}_3$ ). 99% *ee* (HPLC conditions: Chiralpak AD-H column, *n*-Hexane/*i*-PrOH = 80:20, flow rate = 1.0 mL/min, wavelength = 254 nm,  $t_{\text{R}} = 14.665$  min for minor isomer,  $t_{\text{R}} = 17.098$  min for major isomer).

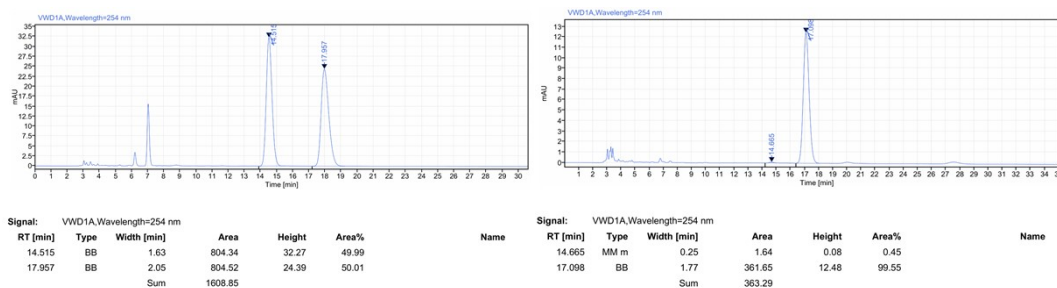

## Representative procedure for synthesis of 5:

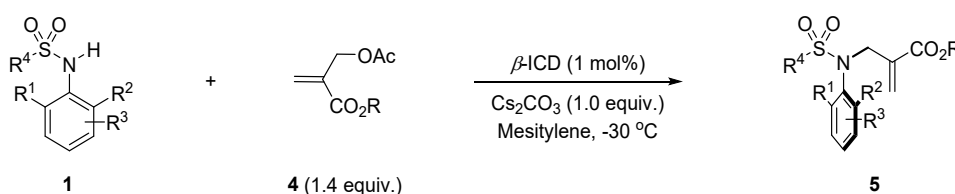

To a Schlenk tube containing **6** (0.05 mmol),  $\beta$ -ICD (1.5 mg, 10 mol%) and  $\text{Cs}_2\text{CO}_3$  (0.05 mmol, 1.0 equiv.) were added mesitylene (3 mL) and MBH acetate **4** (0.14 mmol, 1.4 equiv.). The reaction mixture was stirred at  $-50\text{ }^\circ\text{C}$  for 24 h. The solvent was removed by silica gel column chromatography and the residue was then purified by silica gel column chromatography to afford the product **5**.

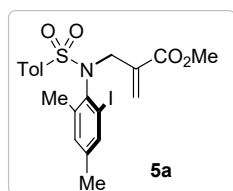

**Characterization of compounds 5 5a.** (94% yield, Hexane-EtOAc = 5:1,  $R_f = 0.5$ ). Syrup.  $^1\text{H NMR}$  (400 MHz,  $\text{CDCl}_3$ )  $\delta$  7.75 (d,  $J = 8.2$  Hz, 2H), 7.50 (s, 1H), 7.29 (d,  $J = 8.2$  Hz, 2H), 6.98 (s, 1H), 6.27 (d,  $J = 0.8$  Hz, 1H), 5.76 (s, 1H), 4.57 (d,  $J = 14.2$  Hz, 1H), 4.51 (d,  $J = 14.2$  Hz, 1H), 3.55 (s, 3H), 2.42 (s, 3H), 2.22 (s, 3H), 2.16 (s, 3H).  $^{13}\text{C NMR}$  (100 MHz,  $\text{CDCl}_3$ )  $\delta$  166.5, 143.5, 141.8, 139.8, 139.0, 138.2, 137.1, 135.4, 132.2, 131.9, 129.4, 128.3, 100.8, 51.9, 50.0, 21.5, 20.3, 20.2. **HRMS (ESI)**  $m/z$  Calcd for  $[\text{C}_{20}\text{H}_{22}\text{INO}_4\text{S}, \text{M} + \text{H}]^+$ : 500.0387; Found: 500.0391.

**Optical Rotation:**  $[\alpha]_D^{25} - 32.0$  ( $c = 1.0$ ,  $\text{CHCl}_3$ ). 90% *ee* (HPLC conditions: Chiralpak AD-H column, *n*-Hexane/*i*-PrOH = 80:20, flow rate = 1.0 mL/min, wavelength = 254 nm,  $t_R = 10.767$  min for minor isomer,  $t_R = 9.470$  min for major isomer).



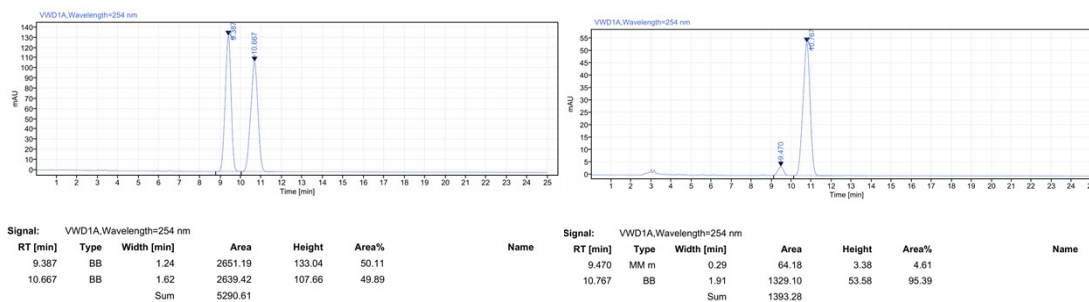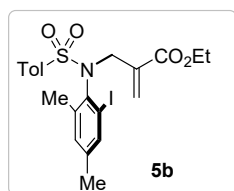

**5b.** (95% yield, Hexane-EtOAc = 5:1,  $R_f$  = 0.5). White solid. **MP:** 122-124 °C.  $^1\text{H NMR}$  (400 MHz,  $\text{CDCl}_3$ )  $\delta$  7.74 (d,  $J$  = 8.2 Hz, 2H), 7.50 (s, 1H), 7.28 (d,  $J$  = 8.2 Hz, 2H), 6.98 (s, 1H), 6.29 (s, 1H), 5.80 (s, 1H), 4.58 (d,  $J$  = 14.2 Hz, 1H), 4.52 (d,  $J$  = 14.2 Hz, 1H), 4.13–3.92 (m, 2H), 2.42 (s, 3H), 2.22 (s, 3H), 2.18 (s, 3H), 1.12 (t,  $J$  = 7.1 Hz, 3H).  $^{13}\text{C NMR}$  (100 MHz,  $\text{CDCl}_3$ )  $\delta$  166.1, 143.4, 142.1, 139.8, 139.0, 138.4, 137.3, 135.9, 132.2, 131.6, 129.4, 128.3, 100.6, 60.9, 49.9, 21.5, 20.3, 20.3, 13.8. **HRMS (ESI)**  $m/z$  Calcd for  $[\text{C}_{21}\text{H}_{24}\text{INO}_4\text{S}, \text{M} + \text{Na}]^+$ : 536.0363; Found: 536.0366.

**Optical Rotation:**  $[\alpha]_D^{25}$  - 24.0 ( $c$  = 1.0,  $\text{CHCl}_3$ ). 90% *ee* (HPLC conditions: Chiralpak AD-H column, *n*-Hexane/*i*-PrOH = 80:20, flow rate = 1.0 mL/min, wavelength = 254 nm,  $t_R$  = 8.212 min for minor isomer,  $t_R$  = 8.861 min for major isomer).

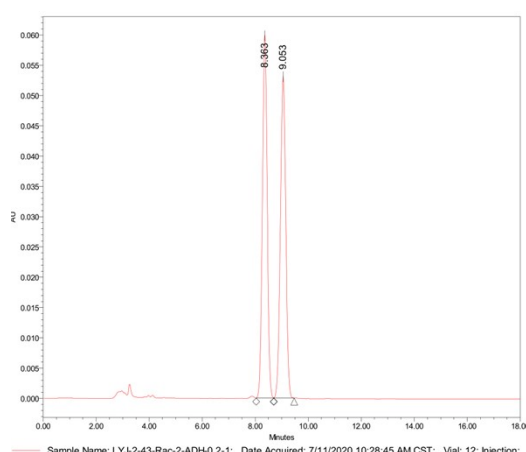

| Peak Table           |           |          |        |       |
|----------------------|-----------|----------|--------|-------|
| Retention Time (min) | Area      | Height   | % Area |       |
| 1                    | 9.053     | 752997   | 53200  | 49.83 |
| 2                    | 8.363     | 758140   | 60017  | 50.17 |
| Sum                  | 1511137.2 | 113217.1 |        |       |

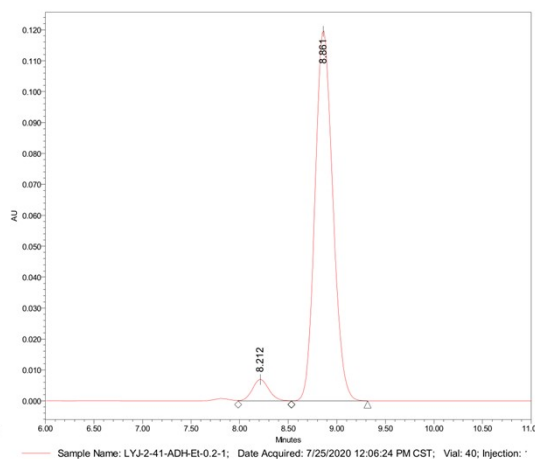

| Peak Table           |           |          |        |       |
|----------------------|-----------|----------|--------|-------|
| Retention Time (min) | Area      | Height   | % Area |       |
| 1                    | 8.861     | 1528150  | 119833 | 94.99 |
| 2                    | 8.212     | 80604    | 6902   | 5.01  |
| Sum                  | 1608753.7 | 126735.2 |        |       |

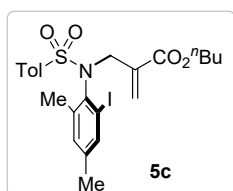

**5c.** (97% yield, Hexane-EtOAc = 5:1,  $R_f$  = 0.4). Syrup.  $^1\text{H NMR}$  (400 MHz,  $\text{CDCl}_3$ )  $\delta$  7.74 (d,  $J$  = 8.3 Hz, 2H), 7.49 (s, 1H), 7.28 (d,  $J$  = 8.3 Hz, 2H), 6.98 (s, 1H), 6.29 (d,  $J$  = 0.9 Hz, 1H), 5.83 (s, 1H), 4.58 (d,  $J$  = 14.3 Hz, 1H), 4.51 (d,  $J$  = 14.3 Hz, 1H), 4.04 – 3.85 (m, 2H), 2.41 (s, 3H), 2.22 (s, 3H), 2.17 (s, 3H), 1.50 – 1.41 (m, 2H), 1.28 (dq,  $J$  = 14.4, 7.3 Hz, 2H), 0.88 (t,  $J$  = 7.3 Hz, 3H).  $^{13}\text{C NMR}$  (100 MHz,  $\text{CDCl}_3$ )  $\delta$  166.1, 143.4, 142.0, 139.7, 139.0, 138.3, 137.3, 135.9, 132.2, 131.6, 129.4, 128.2, 100.6, 64.8, 49.9, 30.3, 21.5, 20.3, 20.3, 19.0, 13.6. **HRMS (ESI)**  $m/z$  Calcd for  $[\text{C}_{23}\text{H}_{28}\text{INO}_4\text{S}, \text{M} + \text{Na}]^+$ : 564.0676; Found: 564.0677.

**Optical Rotation:**  $[\alpha]_D^{25}$  - 24.0 ( $c$  = 1.0,  $\text{CHCl}_3$ ). >99% *ee* (HPLC conditions: Chiralpak AD-H column, *n*-Hexane/*i*-PrOH = 80:20, flow rate = 1.0 mL/min, wavelength = 254 nm,  $t_R$  = 6.472 min for minor isomer,  $t_R$  = 7.548 min for major isomer).

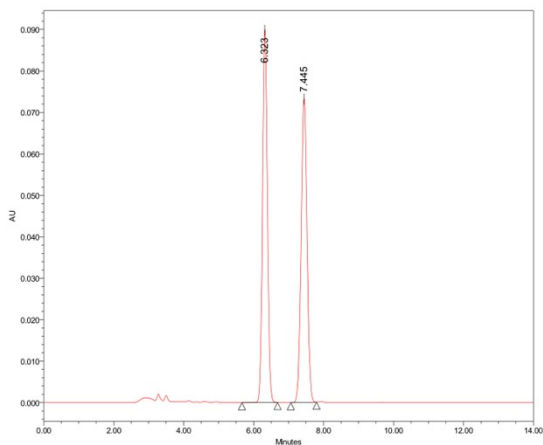

Sample Name: LYJ-2-43-Rac-4-ADH-0.2-1; Date Acquired: 7/11/2020 11:20:06 AM CST; Vial: 14; Injection:

| Peak Table |                      |           |          |
|------------|----------------------|-----------|----------|
|            | Retention Time (min) | Area      | Height   |
| 1          | 7.445                | 865405    | 73458    |
| 2          | 6.323                | 866786    | 90358    |
| Sum        |                      | 1732191.3 | 163816.7 |

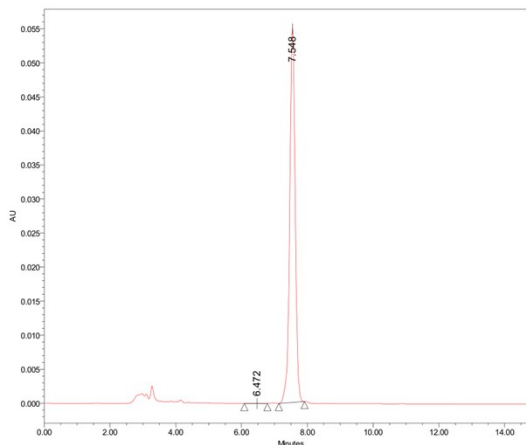

Sample Name: LYJ-2-41-ADH-4-0.2-1; Date Acquired: 7/12/2020 12:11:40 PM CST; Vial: 16; Injection:

| Peak Table |                      |          |         |
|------------|----------------------|----------|---------|
|            | Retention Time (min) | Area     | Height  |
| 1          | 7.548                | 629951   | 54969   |
| 2          | 6.472                | 831      | -26     |
| Sum        |                      | 630781.9 | 54942.8 |

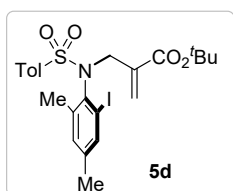

**5d.** (94% yield, Hexane-EtOAc = 5:1,  $R_f = 0.5$ ). Syrup.  $^1\text{H NMR}$  (400 MHz,  $\text{CDCl}_3$ )  $\delta$  7.66 (d,  $J = 8.2$  Hz, 2H), 7.42 (s, 1H), 7.20 (d,  $J = 8.2$  Hz, 2H), 6.92 (s, 1H), 6.18 (d,  $J = 0.9$  Hz, 1H), 5.73 (s, 1H), 4.50 (d,  $J = 14.3$  Hz, 1H), 4.39 (d,  $J = 14.3$  Hz, 1H), 2.35 (s, 3H), 2.15 (s, 3H), 2.14 (s, 3H), 1.24 (s, 9H).  $^{13}\text{C NMR}$  (100 MHz,  $\text{CDCl}_3$ )  $\delta$  165.1, 143.4, 142.4, 139.8, 139.0, 138.5, 137.2, 132.2, 131.2, 129.4, 128.3, 100.3, 81.0, 49.7, 27.7, 21.5, 20.5, 20.3. **HRMS (ESI)**  $m/z$  Calcd for  $[\text{C}_{23}\text{H}_{28}\text{INO}_4\text{S}, \text{M} + \text{Na}]^+$ : 564.0676; Found: 564.0681.

**Optical Rotation:**  $[\alpha]_D^{25} - 14.0$  ( $c = 1.0$ ,  $\text{CHCl}_3$ ). 91% *ee* (HPLC conditions: Chiralpak AD-H column, *n*-Hexane/*i*-PrOH = 80:20, flow rate = 1.0 mL/min, wavelength = 254 nm,  $t_R = 9.470$  min for minor isomer,  $t_R = 10.767$  min for major isomer).

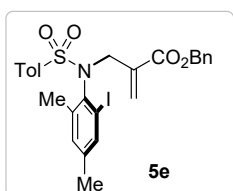

**5e.** (94% yield, Hexane-EtOAc = 5:1,  $R_f$  = 0.4). Syrup.  $^1\text{H NMR}$  (400 MHz,  $\text{CDCl}_3$ )  $\delta$  7.64 (d,  $J$  = 8.3 Hz, 2H), 7.35 (d,  $J$  = 0.6 Hz, 1H), 7.27 – 7.20 (m, 3H), 7.19 – 7.13 (m, 4H), 6.83 (d,  $J$  = 0.6 Hz, 1H), 6.25 (d,  $J$  = 0.8 Hz, 1H), 5.76 (s, 1H), 4.98 (d,  $J$  = 12.4 Hz, 1H), 4.88 (d,  $J$  = 12.4 Hz, 1H), 4.50 (d,  $J$  = 14.3 Hz, 1H), 4.45 (d,  $J$  = 14.3 Hz, 1H), 2.32 (s, 3H), 2.10 (s, 3H), 2.03 (s, 3H).  $^{13}\text{C NMR}$  (100 MHz,  $\text{CDCl}_3$ )  $\delta$  165.8, 143.4, 141.8, 139.7, 139.0, 138.1, 137.2, 135.6, 135.4, 132.1, 132.1, 129.4, 128.3, 128.2, 128.1, 128.1, 100.7, 66.6, 50.0, 21.5, 20.3, 20.2. **HRMS (ESI)**  $m/z$  Calcd for  $[\text{C}_{26}\text{H}_{26}\text{INO}_4\text{S}, \text{M} + \text{Na}]^+$ : 598.0519; Found: 598.0523.

**Optical Rotation:**  $[\alpha]_D^{25}$  - 24.0 ( $c$  = 1.0,  $\text{CHCl}_3$ ). 91% *ee* (HPLC conditions: Chiralpak AD-H column, *n*-Hexane/*i*-PrOH = 80:20, flow rate = 1.0 mL/min, wavelength = 254 nm,  $t_R$  = 12.137 min for minor isomer,  $t_R$  = 13.047 min for major isomer).

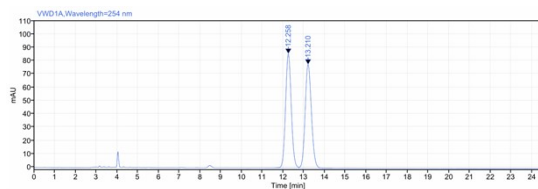

| RT [min] | Type | Width [min] | Area    | Height | Area% |
|----------|------|-------------|---------|--------|-------|
| 12.258   | BV   | 1.65        | 1645.74 | 85.93  | 50.30 |
| 13.210   | VB   | 1.60        | 1626.31 | 77.90  | 49.70 |
| Sum      |      |             | 3272.05 |        |       |

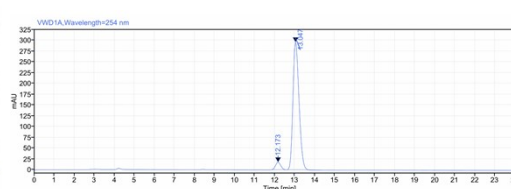

| RT [min] | Type | Width [min] | Area    | Height | Area% |
|----------|------|-------------|---------|--------|-------|
| 12.173   | MM m | 0.28        | 307.04  | 17.16  | 4.69  |
| 13.047   | MB m | 0.33        | 6246.10 | 295.44 | 95.31 |
| Sum      |      |             | 6553.14 |        |       |

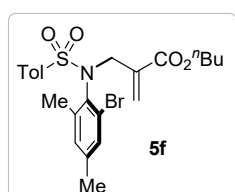

**5f.** (92% yield, Hexane-EtOAc = 5:1,  $R_f$  = 0.4). Syrup.  $^1\text{H NMR}$  (400 MHz,  $\text{CDCl}_3$ )  $\delta$  7.72 (d,  $J$  = 7.8 Hz, 2H), 7.27 (d,  $J$  = 8.0 Hz, 2H), 7.17 (s, 1H), 6.97 (s, 1H), 6.27 (s, 1H), 5.80 (s, 1H), 4.61 (d,

$J = 14.2$  Hz, 1H), 4.44 (d,  $J = 14.2$  Hz, 1H), 4.13 – 3.82 (m, 2H), 2.42 (s, 3H), 2.25 (s, 6H), 1.52–1.45 (m, 2H), 1.35 – 1.24 (m, 2H), 0.89 (t,  $J = 7.3$  Hz, 3H).  $^{13}\text{C}$  NMR (100 MHz,  $\text{CDCl}_3$ )  $\delta$  166.1, 143.4, 142.8, 139.6, 137.9, 136.0, 133.9, 132.1, 131.3, 131.2, 129.4, 128.1, 124.6, 64.8, 49.7, 30.4, 21.6, 20.6, 20.0, 19.1, 13.7. **HRMS (ESI)**  $m/z$  Calcd for  $[\text{C}_{23}\text{H}_{28}\text{BrNO}_4\text{S}, \text{M} + \text{Na}]^+$ : 516.0815; Found: 516.0819.

**Optical Rotation:**  $[\alpha]^{25}_{\text{D}} - 4.2$  ( $c = 1.0$ ,  $\text{CHCl}_3$ ). 83% *ee* (HPLC conditions: Chiralpak OD-H column, *n*-Hexane/*i*-PrOH = 95:5, flow rate = 1.0 mL/min, wavelength = 254 nm,  $t_{\text{R}} = 10.953$  min for minor isomer,  $t_{\text{R}} = 9.292$  min for major isomer).

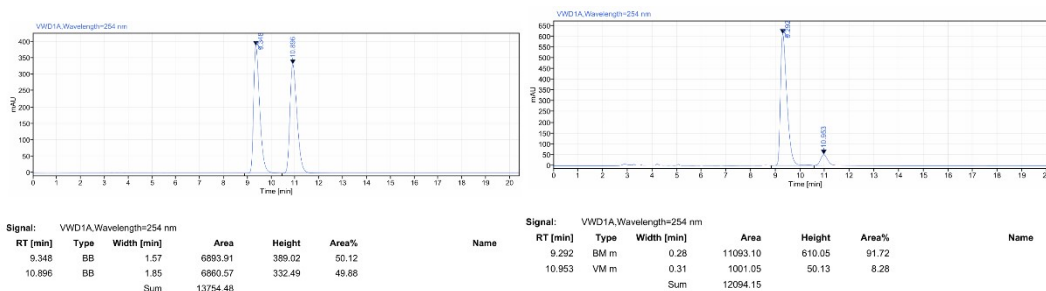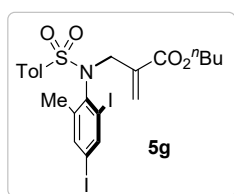

**5g.** (82% yield, Hexane-EtOAc = 5:1,  $R_f = 0.5$ ). Syrup.  $^1\text{H}$  NMR (400 MHz,  $\text{CDCl}_3$ )  $\delta$  8.00 (d,  $J = 1.6$  Hz, 1H), 7.73 (d,  $J = 8.2$  Hz, 2H), 7.52 (d,  $J = 1.6$  Hz, 1H), 7.30 (d,  $J = 8.2$  Hz, 2H), 6.33 (s, 1H), 5.88 (s, 1H), 4.56 (d,  $J = 14.3$  Hz, 1H), 4.49 (d,  $J = 14.3$  Hz, 1H), 4.00 (dt,  $J = 10.9, 6.8$  Hz, 1H), 3.91 (dt,  $J = 10.9, 6.8$  Hz, 1H), 2.43 (s, 3H), 2.18 (s, 3H), 1.50 – 1.41 (m, 2H), 1.33 – 1.26 (m, 2H), 0.90 (t,  $J = 7.3$  Hz, 3H).  $^{13}\text{C}$  NMR (100 MHz,  $\text{CDCl}_3$ )  $\delta$  166.0, 146.1, 144.6, 143.8, 140.3, 140.2, 138.0, 135.7, 132.0, 129.6, 128.3, 101.9, 94.8, 65.0, 50.0, 30.3, 21.6, 20.2, 19.1, 13.7. **HRMS (ESI)**  $m/z$  Calcd for  $[\text{C}_{22}\text{H}_{25}\text{I}_2\text{NO}_4\text{S}, \text{M} + \text{Na}]^+$ : 675.9486; Found: 675.9491.

**Optical Rotation:**  $[\alpha]^{25}_{\text{D}} - 2.4$  ( $c = 0.5$ ,  $\text{CHCl}_3$ ). 90% *ee* (HPLC conditions: Chiralpak OD-H column, *n*-Hexane/*i*-PrOH = 95:5, flow rate = 1.0 mL/min,

wavelength = 254 nm,  $t_R = 11.867$  min for minor isomer,  $t_R = 9.781$  min for major isomer).

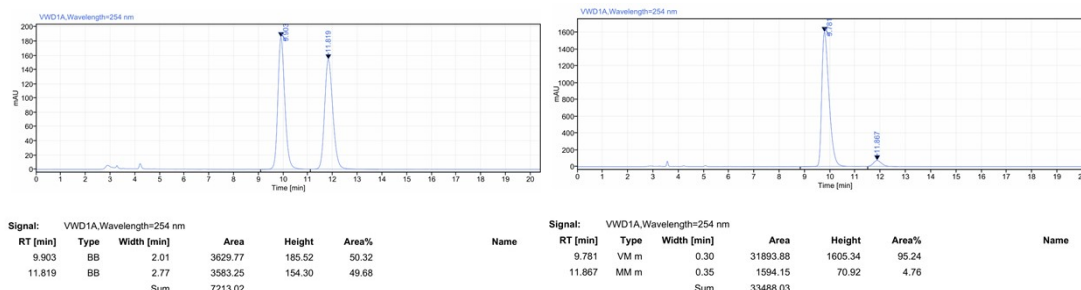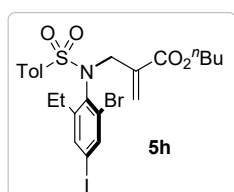

**5h.** (80% yield, Hexane-EtOAc = 5:1,  $R_f = 0.5$ ). Syrup.  $^1\text{H NMR}$  (400 MHz,  $\text{CDCl}_3$ )  $\delta$  7.81 (d,  $J = 1.8$  Hz, 1H), 7.73 (d,  $J = 8.1$  Hz, 2H), 7.41 (d,  $J = 1.8$  Hz, 1H), 7.30 (d,  $J = 8.1$  Hz, 2H), 6.34 (s, 1H), 5.86 (s, 1H), 4.54 (d,  $J = 14.3$  Hz, 1H), 4.49 (d,  $J = 14.3$  Hz, 1H), 4.03 – 3.96 (m, 1H), 3.96 – 3.88 (m, 1H), 2.66 (dq,  $J = 15.1, 7.5$  Hz, 1H), 2.50 (dq,  $J = 15.1, 7.5$  Hz, 1H), 2.44 (s, 3H), 1.50 – 1.43 (m, 2H), 1.33 – 1.25 (m, 2H), 1.14 (t,  $J = 7.5$  Hz, 3H), 0.90 (t,  $J = 7.3$  Hz, 3H)..  $^{13}\text{C NMR}$  (100 MHz,  $\text{CDCl}_3$ )  $\delta$  166.0, 162.5, 149.9, 143.8, 140.3, 138.7, 138.0, 135.5, 132.2, 129.6, 128.3, 123.0, 101.3, 65.0, 50.0, 30.4, 25.4, 21.6, 19.1, 14.2, 13.7. **HRMS (ESI)**  $m/z$  Calcd for  $[\text{C}_{23}\text{H}_{27}\text{BrINO}_4\text{S}, \text{M} + \text{Na}]^+$ : 641.9781; Found: 641.9785.

**Optical Rotation:**  $[\alpha]_D^{25} = -5.6$  ( $c = 1.0$ ,  $\text{CHCl}_3$ ). 89% *ee* (HPLC conditions: Chiralpak OD-H column, *n*-Hexane/*i*-PrOH = 95:5, flow rate = 1.0 mL/min, wavelength = 254 nm,  $t_R = 8.678$  min for minor isomer,  $t_R = 7.688$  min for major isomer)

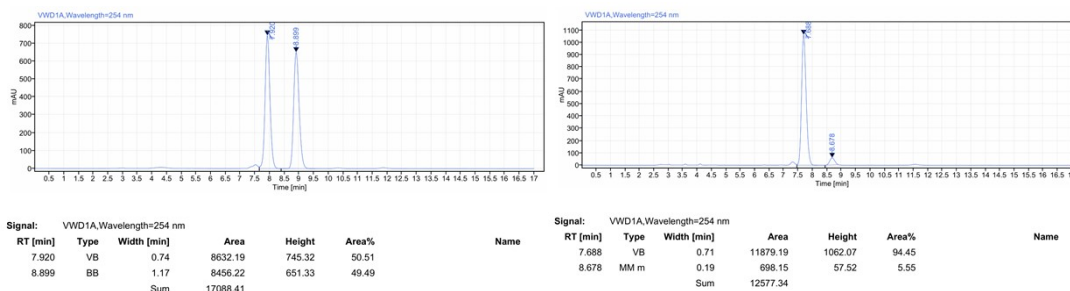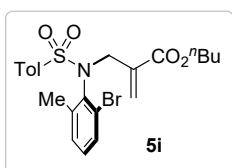

**5i.** (95% yield, Hexane-EtOAc = 5:1,  $R_f$  = 0.5). Syrup.  $^1\text{H NMR}$  (400 MHz,  $\text{CDCl}_3$ )  $\delta$  7.73 (d,  $J$  = 8.2 Hz, 2H), 7.35 (d,  $J$  = 7.9 Hz, 1H), 7.28 (d,  $J$  = 8.2 Hz, 2H), 7.17 (d,  $J$  = 7.5 Hz, 1H), 7.04 (dd,  $J$  = 7.9, 7.5 Hz, 1H), 6.28 (s, 1H), 5.82 (s, 1H), 4.62 (d,  $J$  = 14.3 Hz, 1H), 4.47 (d,  $J$  = 14.3 Hz, 1H), 4.00 (dt,  $J$  = 11.0, 6.6 Hz, 1H), 3.91 (dt,  $J$  = 11.0, 6.6 Hz, 1H), 2.43 (s, 3H), 2.30 (s, 3H), 1.52 – 1.43 (m, 2H), 1.34 – 1.25 (m, 2H), 0.89 (t,  $J$  = 7.3 Hz, 3H).  $^{13}\text{C NMR}$  (100 MHz,  $\text{CDCl}_3$ )  $\delta$  166.1, 143.6, 143.5, 137.9, 136.7, 135.9, 131.6, 131.3, 130.4, 129.4, 129.4, 128.1, 125.0, 64.9, 49.7, 30.4, 21.6, 20.1, 19.1, 13.7. **HRMS (ESI)**  $m/z$  Calcd for  $[\text{C}_{22}\text{H}_{26}\text{BrNO}_4\text{S}, \text{M} + \text{Na}]^+$ : 502.0658; Found: 502.0662.

**Optical Rotation:**  $[\alpha]_D^{25}$  - 10.4 ( $c$  = 1.0,  $\text{CHCl}_3$ ). 83% *ee* (HPLC conditions: Chiralpak OD-H column, *n*-Hexane/*i*-PrOH = 90:10, flow rate = 1.0 mL/min, wavelength = 254 nm,  $t_R$  = 7.597 min for minor isomer,  $t_R$  = 6.677 min for major isomer)

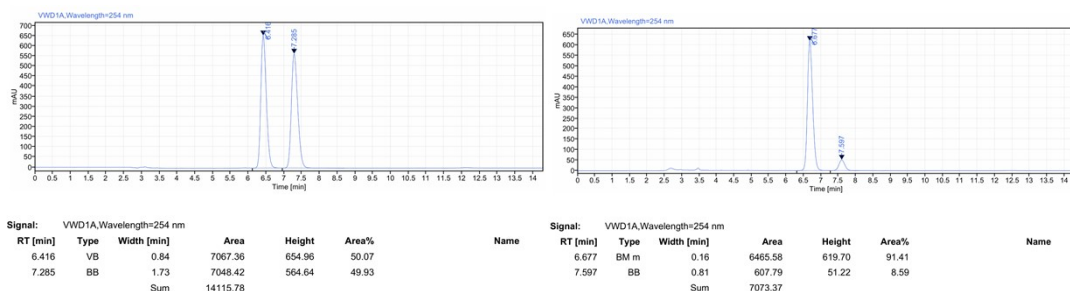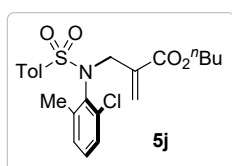

**5j.** (92% yield, Hexane-EtOAc = 5:1,  $R_f$  = 0.4). Syrup.  $^1\text{H NMR}$  (400 MHz,  $\text{CDCl}_3$ )  $\delta$  7.68 (d,  $J$  = 8.3 Hz, 2H), 7.25 (d,  $J$  = 8.3 Hz, 1H), 7.17 (d,  $J$  = 8.3 Hz, 2H), 7.04 (dd,  $J$  = 7.9, 7.5 Hz, 1H), 6.28 (s, 1H), 5.82 (s, 1H), 4.62 (d,  $J$  = 14.3 Hz, 1H), 4.47 (d,  $J$  = 14.3 Hz, 1H), 4.00 (dt,  $J$  = 11.0, 6.6 Hz, 1H), 3.91 (dt,  $J$  = 11.0, 6.6 Hz, 1H), 2.43 (s, 3H), 2.30 (s, 3H), 1.52 – 1.43 (m, 2H), 1.34 – 1.25 (m, 2H), 0.89 (t,  $J$  = 7.3 Hz, 3H).  $^{13}\text{C NMR}$  (100 MHz,  $\text{CDCl}_3$ )  $\delta$  166.1, 143.6, 143.5, 137.9, 136.7, 135.9, 131.6, 131.3, 130.4, 129.4, 129.4, 128.1, 125.0, 64.9, 49.7, 30.4, 21.6, 20.1, 19.1, 13.7. **HRMS (ESI)**  $m/z$  Calcd for  $[\text{C}_{22}\text{H}_{25}\text{ClNO}_4\text{S}, \text{M} + \text{Na}]^+$ : 487.0662; Found: 487.0662.

2H), 7.18 – 7.02 (m, 3H), 6.23 (d,  $J = 1.1$  Hz, 1H), 5.77 (s, 1H), 4.61 (d,  $J = 14.2$  Hz, 1H), 4.37 (d,  $J = 14.2$  Hz, 1H), 3.99 (dt,  $J = 10.9, 6.7$  Hz, 1H), 3.91 (dt,  $J = 10.9, 6.7$  Hz, 1H), 2.41 (s, 3H), 2.29 (s, 3H), 1.51 – 1.42 (m, 2H), 1.33 – 1.23 (m, 2H), 0.87 (t,  $J = 7.4$  Hz, 3H).  $^{13}\text{C}$  NMR (100 MHz,  $\text{CDCl}_3$ )  $\delta$  166.32, 143.77, 143.64, 137.95, 136.23, 135.47, 135.12, 131.31, 130.09, 129.69, 129.40, 128.40, 128.31, 65.15, 50.00, 30.68, 21.86, 20.06, 19.36, 13.95. **HRMS (ESI)**  $m/z$  Calcd for  $[\text{C}_{22}\text{H}_{26}\text{ClNO}_4\text{S}, \text{M} + \text{Na}]^+$ : 458.1163; Found: 458.1168.

**Optical Rotation:**  $[\alpha]^{25}_{\text{D}} - 2.6$  ( $c = 1.0$ ,  $\text{CHCl}_3$ ). 92% *ee* (HPLC conditions: Chiralpak OD-H column, *n*-Hexane/*i*-PrOH = 80:20, flow rate = 1.0 mL/min, wavelength = 254 nm,  $t_{\text{R}} = 5.660$  min for minor isomer,  $t_{\text{R}} = 5.172$  min for major isomer).

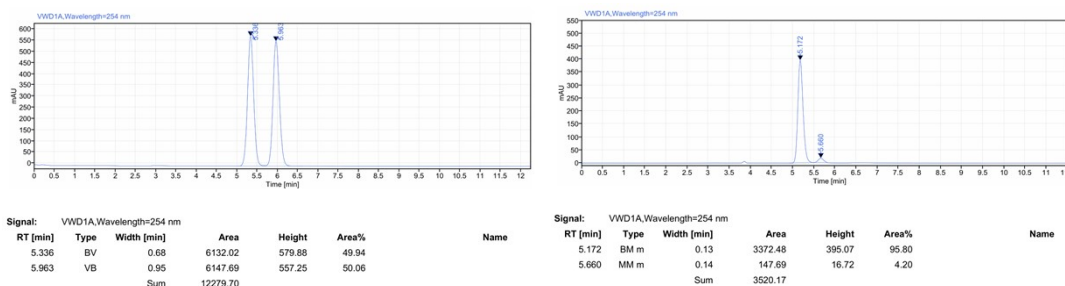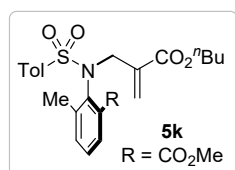

**5k.** (87% yield, Hexane-EtOAc-Chlorobenzene = 7:1:1,  $R_{\text{f}} = 0.6$ ). Syrup.  $^1\text{H}$  NMR (400 MHz,  $\text{CDCl}_3$ )  $\delta$  7.64 (dd,  $J = 7.6, 1.4$  Hz, 1H), 7.52 (d,  $J = 8.3$  Hz, 2H), 7.31 (dd,  $J = 7.6, 1.4$  Hz, 1H), 7.25 – 7.22 (m, 1H), 7.20 (d,  $J = 8.3$  Hz, 2H), 6.31 (d,  $J = 1.3$  Hz, 1H), 5.90 (s, 1H), 4.64 (d,  $J = 14.6$  Hz, 1H), 4.58 (d,  $J = 14.6$  Hz, 1H), 3.90 (t,  $J = 6.7$  Hz, 2H), 3.54 (s, 3H), 2.38 (s, 3H), 1.94 (s, 3H), 1.41 – 1.32 (m, 2H), 1.26 – 1.16 (m, 2H), 0.82 (t,  $J = 7.3$  Hz, 3H).  $^{13}\text{C}$  NMR (100 MHz,  $\text{CDCl}_3$ )  $\delta$  166.8, 166.4, 143.0, 140.9, 138.1, 136.9, 135.0, 132.6, 131.1, 129.4, 128.1, 127.5, 64.7, 51.9, 51.8, 30.3, 21.5, 19.0, 18.9, 13.6. **HRMS (ESI)**  $m/z$  Calcd for  $[\text{C}_{24}\text{H}_{29}\text{NO}_6\text{S}, \text{M} + \text{H}]^+$ : 460.1788; Found: 460.1783.



**Optical Rotation:**  $[\alpha]^{25}_D - 0.4$  ( $c = 1.0$ ,  $\text{CHCl}_3$ ). 70% *ee* (HPLC conditions: Chiralpak AS-H column, *n*-Hexane/*i*-PrOH = 90:0, flow rate = 1.0 mL/min, wavelength = 254 nm,  $t_R = 12.987$  min for minor isomer,  $t_R = 12.167$  min for major isomer).

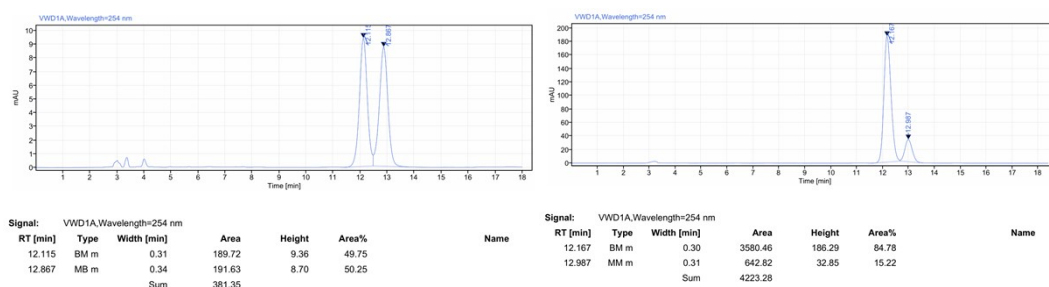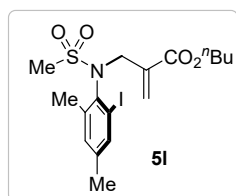

**51.** (97% yield, Hexane-EtOAc = 5:1,  $R_f = 0.5$ ). Syrup.  $^1\text{H NMR}$  (400 MHz,  $\text{CDCl}_3$ )  $\delta$  7.54 (s, 1H), 7.03 (s, 1H), 6.22 (s, 1H), 5.45 (s, 1H), 4.71 (d,  $J = 14.1$  Hz, 1H), 4.21 – 4.03 (m, 3H), 3.40 (s, 3H), 2.37 (s, 3H), 2.24 (s, 3H), 1.63 – 1.57 (m, 2H), 1.46 – 1.32 (m, 2H), 0.93 (t,  $J = 7.3$  Hz, 3H).  $^{13}\text{C NMR}$  (100 MHz,  $\text{CDCl}_3$ )  $\delta$  166.3, 140.9, 140.1, 138.6, 137.2, 135.2, 132.6, 131.7, 103.1, 65.1, 50.5, 42.8, 30.5, 20.4, 20.1, 19.2, 13.7. **HRMS (ESI)**  $m/z$  Calcd for  $[\text{C}_{17}\text{H}_{24}\text{INO}_4\text{S}, \text{M} + \text{H}]^+$ : 466.0543; Found: 466.0547

**Optical Rotation:**  $[\alpha]^{25}_D - 7.8$  ( $c = 1.0$ ,  $\text{CHCl}_3$ ). 98% *ee* (HPLC conditions: Chiralpak OD-H column, *n*-Hexane/*i*-PrOH = 80:20, flow rate = 1.0 mL/min, wavelength = 254 nm,  $t_R = 7.17$  min for minor isomer,  $t_R = 8.413$  min for major isomer).

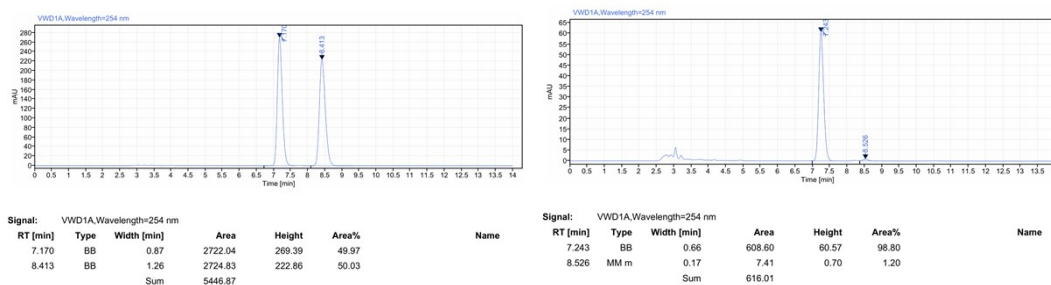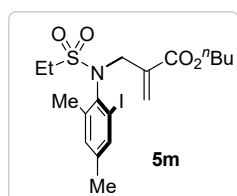

**5m.** (92% yield, Hexane-EtOAc = 5:1,  $R_f$  = 0.5). Syrup.  $^1\text{H}$  NMR (400 MHz,  $\text{CDCl}_3$ )  $\delta$  7.54 (s, 1H), 7.03 (s, 1H), 6.22 (s, 1H), 5.49 (s, 1H), 4.69 (d,  $J$  = 14.0 Hz, 1H), 4.19 (d,  $J$  = 14.0 Hz, 1H), 4.16 – 3.96 (m, 2H), 3.75 – 3.46 (m, 2H), 2.38 (s, 3H), 2.24 (s, 3H), 1.61 – 1.54 (m, 2H), 1.47 (t,  $J$  = 7.4 Hz, 3H), 1.41 – 1.31 (m, 2H), 0.92 (t,  $J$  = 7.4 Hz, 3H).  $^{13}\text{C}$  NMR (100 MHz,  $\text{CDCl}_3$ )  $\delta$  166.3, 141.2, 140.0, 138.6, 137.2, 135.4, 132.6, 131.8, 103.0, 65.1, 50.4, 50.0, 30.5, 20.3, 20.2, 19.2, 13.7, 8.1. **HRMS (ESI)**  $m/z$  Calcd for  $[\text{C}_{18}\text{H}_{26}\text{INO}_4\text{S}, \text{M} + \text{Na}]^+$ : 502.0519; Found: 502.0523.

**Optical Rotation:**  $[\alpha]_D^{25} - 4.6$  ( $c$  = 1.0,  $\text{CHCl}_3$ ). 98%  $ee$  (HPLC conditions: Chiralpak OD-H column,  $n$ -Hexane/ $i$ -PrOH = 80:20, flow rate = 1.0 mL/min, wavelength = 254 nm,  $t_R$  = 6.830 min for minor isomer,  $t_R$  = 5.341 min for major isomer).

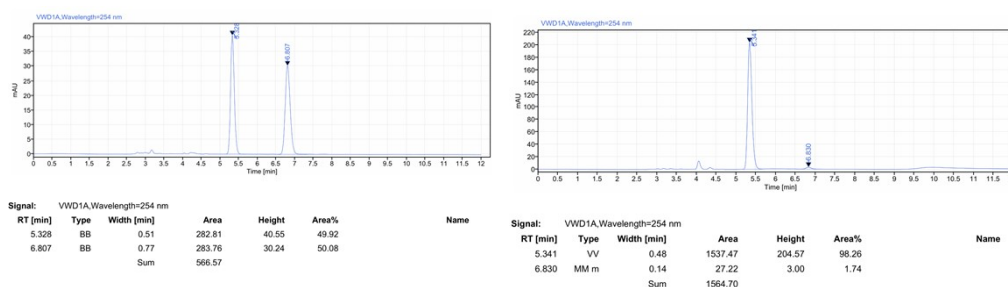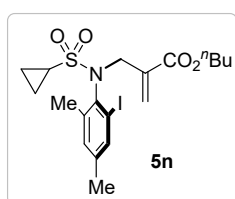

**5n.** (87% yield, Hexane-EtOAc = 5:1,  $R_f$  = 0.5). Syrup.  $^1\text{H}$  NMR (400 MHz,  $\text{CDCl}_3$ )  $\delta$  7.56 (s, 1H), 7.01 (s, 1H), 6.24 (s, 1H), 5.63 (s, 1H), 4.64 (d,  $J$  = 14.1 Hz, 1H), 4.42 (d,  $J$  = 14.1 Hz, 1H), 4.20 – 3.88 (m, 2H), 3.12 – 2.78 (m, 1H), 2.35 (s, 3H), 2.24 (s, 3H),

1.58 – 1.51 (m, 2H), 1.38 – 1.31 (m, 2H), 1.28 – 1.15 (m, 2H), 1.15 – 1.01 (m, 2H), 0.91 (t,  $J = 7.3$  Hz, 3H).  $^{13}\text{C}$  NMR (100 MHz,  $\text{CDCl}_3$ )  $\delta$  166.2, 141.4, 139.9, 138.7, 137.4, 135.7, 132.4, 131.6, 102.4, 65.0, 50.4, 32.4, 30.4, 20.3, 20.3, 19.1, 13.7, 7.2, 6.5. **HRMS (ESI)**  $m/z$  Calcd for  $[\text{C}_{19}\text{H}_{26}\text{INO}_4\text{S}, \text{M} + \text{Na}]^+$ : 514.0519; Found: 514.0521.

**Optical Rotation:**  $[\alpha]_D^{25} - 2.3$  ( $c = 1.0$ ,  $\text{CHCl}_3$ ). 96% *ee* (HPLC conditions: Chiralpak OD-H column, *n*-Hexane/*i*-PrOH = 80:20, flow rate = 1.0 mL/min, wavelength = 254 nm,  $t_R = 6.928$  min for minor isomer,  $t_R = 6.316$  min for major isomer).

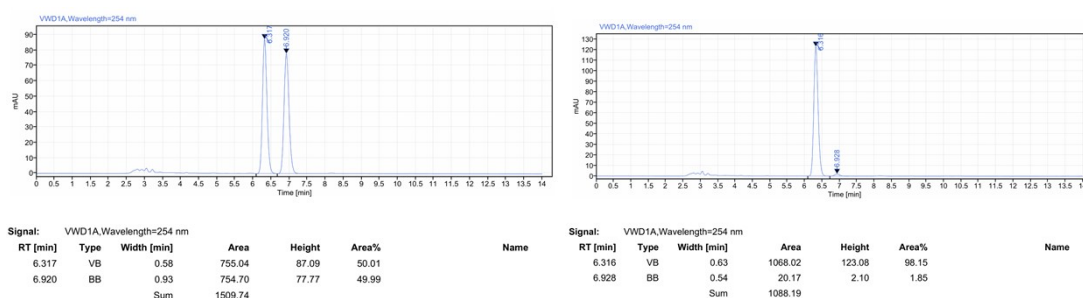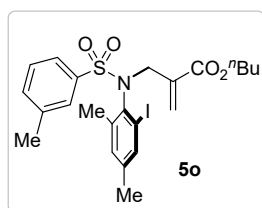

**5o.** (78% yield, Hexane-EtOAc = 5:1,  $R_f = 0.5$ ). Syrup.  $^1\text{H}$  NMR (400 MHz,  $\text{CDCl}_3$ )  $\delta$  7.67–7.65 (m, 2H), 7.50 (s, 1H), 7.40–7.37 (m, 2H), 6.99 (s, 1H), 6.30 (s, 1H), 5.85 (s, 1H), 4.59 (d,  $J = 14.2$  Hz, 1H), 4.52 (d,  $J = 14.2$  Hz, 1H), 4.05 – 3.95 (m, 1H), 3.95 – 3.85 (m, 1H), 2.41 (s, 3H), 2.23 (s, 3H), 2.19 (s, 3H), 1.51 – 1.42 (m, 2H), 1.31 – 1.24 (m, 2H), 0.89 (t,  $J = 7.3$  Hz, 3H).  $^{13}\text{C}$  NMR (100 MHz,  $\text{CDCl}_3$ )  $\delta$  166.2, 142.2, 141.1, 139.8, 139.1, 139.0, 137.3, 136.0, 133.5, 132.2, 131.7, 128.7, 128.7, 125.4, 100.4, 64.9, 50.0, 30.4, 21.3, 20.4, 20.3, 19.1, 13.7. **HRMS (ESI)**  $m/z$  Calcd for  $[\text{C}_{23}\text{H}_{28}\text{NO}_4\text{S}, \text{M} + \text{Na}]^+$ : 564.0676; Found: 564.0681.

**Optical Rotation:**  $[\alpha]_D^{25} - 0.4$  ( $c = 1.0$ ,  $\text{CHCl}_3$ ). 92% *ee* (HPLC conditions: Chiralpak AS-H column, *n*-Hexane/*i*-PrOH = 80:20, flow rate = 1.0 mL/min,

wavelength = 254 nm,  $t_R$  = 5.553 min for minor isomer,  $t_R$  = 6.347 min for major isomer).

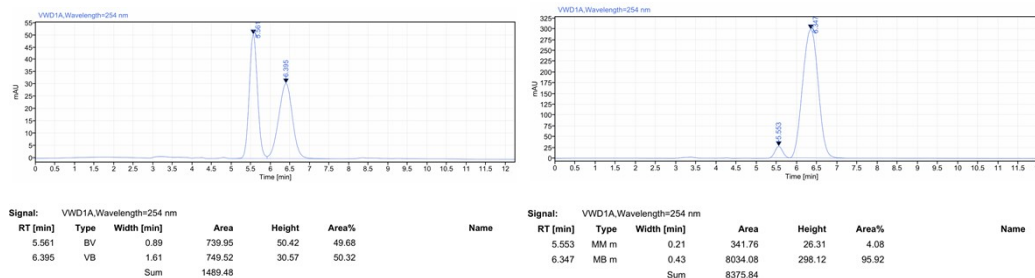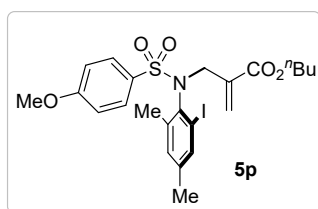

**5p.** (64% yield, Hexane-EtOAc = 5:1,  $R_f$  = 0.5). Syrup.

**$^1\text{H}$  NMR** (400 MHz,  $\text{CDCl}_3$ )  $\delta$  7.79 (d,  $J$  = 8.7 Hz, 2H), 7.50 (s, 1H), 6.99 (s, 1H), 6.96 (d,  $J$  = 8.7 Hz, 2H), 6.29 (s, 1H), 5.83 (s, 1H), 4.57 (d,  $J$  = 14.3 Hz, 1H), 4.51 (d,  $J$  =

14.3 Hz, 1H), 4.00 (dt,  $J$  = 11.2, 6.8 Hz, 1H), 3.91 (dt,  $J$  = 11.2, 6.8 Hz, 1H), 3.87 (s, 3H), 2.23 (s, 3H), 2.20 (s, 3H), 1.53 – 1.41 (m, 2H), 1.34 – 1.24 (m, 2H), 0.89 (t,  $J$  = 7.3 Hz, 3H).  **$^{13}\text{C}$  NMR** (100 MHz,  $\text{CDCl}_3$ )  $\delta$  166.2, 163.1, 142.1, 139.8, 139.1, 137.5, 136.0, 133.2, 132.3, 131.5, 130.4, 113.9, 100.5, 64.9, 55.6, 50.0, 30.4, 20.4, 20.3, 19.1, 13.7. **HRMS (ESI)**  $m/z$  Calcd for  $[\text{C}_{23}\text{H}_{28}\text{INO}_5\text{S}, \text{M} + \text{H}]^+$ : 558.0806; Found: 558.0811.

**Optical Rotation:**  $[\alpha]^{25}_{\text{D}}$  – 19.0 ( $c$  = 1.0,  $\text{CHCl}_3$ ). 90% *ee* (HPLC conditions: Chiralpak AD-H column, *n*-Hexane/*i*-PrOH = 80:20, flow rate = 1.0 mL/min, wavelength = 254 nm,  $t_R$  = 9.160 min for minor isomer,  $t_R$  = 9.902 min for major isomer).

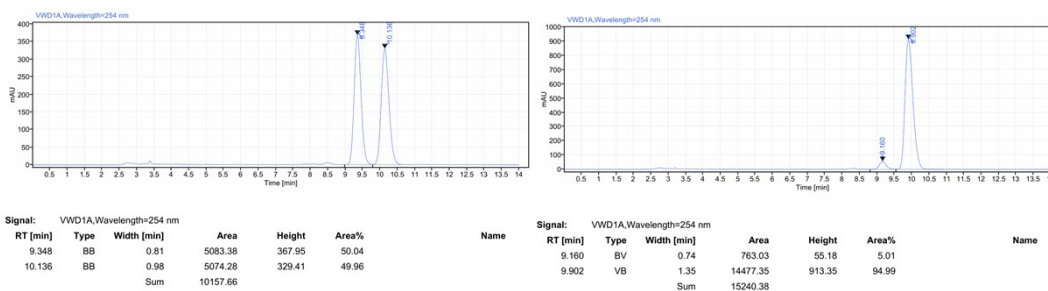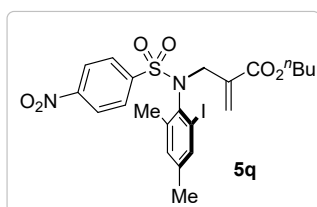

**5q.** (86% yield, Hexane-EtOAc = 5:1,  $R_f = 0.4$ ). Syrup.  $^1\text{H NMR}$  (400 MHz,  $\text{CDCl}_3$ )  $\delta$  8.34 (d,  $J = 8.5$  Hz, 2H), 8.05 (d,  $J = 8.5$  Hz, 2H), 7.49 (s, 1H), 7.03 (s, 1H), 6.31 (s, 1H), 5.78 (s, 1H), 4.65 (d,  $J = 14.1$  Hz, 1H), 4.57 (d,  $J = 14.1$  Hz, 1H), 4.09 – 3.98 (m, 1H), 3.98 – 3.89 (m, 1H), 2.25 (s, 3H), 2.23 (s, 3H), 1.55 – 1.44 (m, 2H), 1.35 – 1.25 (m, 2H), 0.89 (t,  $J = 7.3$  Hz, 3H).  $^{13}\text{C NMR}$  (100 MHz,  $\text{CDCl}_3$ )  $\delta$  165.9, 150.1, 146.7, 142.3, 140.5, 139.2, 136.2, 135.3, 132.5, 132.2, 129.6, 124.1, 99.9, 65.0, 50.5, 30.4, 20.4, 20.4, 19.1, 13.6. **HRMS (ESI)**  $m/z$  Calcd for  $[\text{C}_{22}\text{H}_{25}\text{IN}_2\text{O}_6\text{S}, \text{M} + \text{Na}]^+$ : 595.0370; Found: 595.0373.

**Optical Rotation:**  $[\alpha]_D^{25} - 15.6$  ( $c = 1.0$ ,  $\text{CHCl}_3$ ). 89% *ee* (HPLC conditions: Chiralpak AD-H column, *n*-Hexane/*i*-PrOH = 80:20, flow rate = 1.0 mL/min, wavelength = 254 nm,  $t_R = 7.914$  min for minor isomer,  $t_R = 8.711$  min for major isomer).

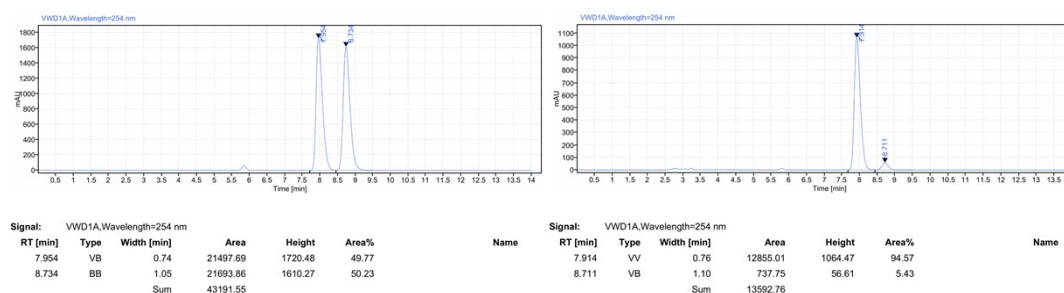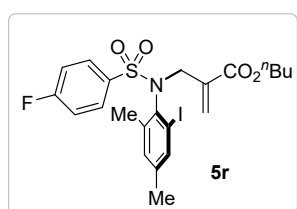

**5r.** (97% yield, Hexane-EtOAc = 5:1,  $R_f = 0.5$ ). Syrup.  $^1\text{H NMR}$  (400 MHz,  $\text{CDCl}_3$ )  $\delta$  7.87 (dd,  $J = 8.6, 5.2$  Hz, 2H), 7.49 (s, 1H), 7.17 (t,  $J = 8.6$  Hz, 2H), 7.00 (s, 1H), 6.30 (s, 1H), 5.80 (s, 1H), 4.60 (d,  $J = 14.2$  Hz, 1H), 4.52 (d,  $J =$

14.2 Hz, 1H), 4.09 – 3.97 (m, 1H), 3.97 – 3.88 (m, 1H), 2.23 (s, 3H), 2.21 (s, 3H), 1.52 – 1.43 (m, 2H), 1.34 – 1.25 (m, 2H), 0.89 (t,  $J = 7.3$  Hz, 3H).  $^{13}\text{C}$  NMR (100 MHz,  $\text{CDCl}_3$ )  $\delta$  166.4, 165.3 ( $^1J_{\text{C-F}} = 253.0$  Hz), 142.2, 140.1, 139.2, 137.4 (d,  $^4J_{\text{C-F}} = 3.3$  Hz), 137.0, 135.8, 132.4, 131.8, 131.0 (d,  $^3J_{\text{C-F}} = 9.3$  Hz), 116.0 (d,  $^2J_{\text{C-F}} = 22.5$  Hz), 100.2, 64.9, 50.2, 30.4, 20.4, 20.3, 19.1, 13.7.  $^{19}\text{F}$  NMR (376 MHz,  $\text{CDCl}_3$ )  $\delta$  -105.46. **HRMS (ESI)**  $m/z$  Calcd for  $[\text{C}_{22}\text{H}_{25}\text{FINO}_4\text{S}, \text{M} + \text{Na}]^+$ : 568.0425; Found: 568.0429.

**Optical Rotation:**  $[\alpha]_{\text{D}}^{25} - 30.0$  ( $c = 1.0$ ,  $\text{CHCl}_3$ ). 93% *ee* (HPLC conditions: Chiralpak OD-H column, *n*-Hexane/*i*-PrOH = 80:20, flow rate = 1.0 mL/min, wavelength = 254 nm,  $t_{\text{R}} = 6.878$  min for minor isomer,  $t_{\text{R}} = 6.110$  min for major isomer).

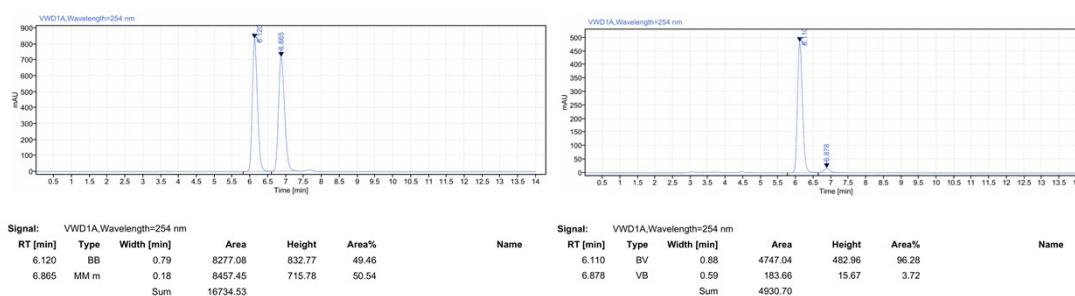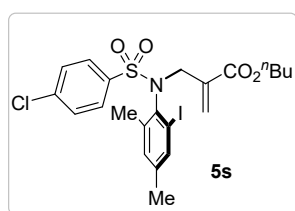

**5s.** (92% yield, Hexane-EtOAc = 5:1,  $R_f = 0.5$ ). Syrup.  $^1\text{H}$  NMR (400 MHz,  $\text{CDCl}_3$ )  $\delta$  7.80 (d,  $J = 8.2$  Hz, 2H), 7.50 (s, 1H), 7.47 (d,  $J = 8.2$  Hz, 2H), 7.00 (s, 1H), 6.30 (s, 1H), 5.80 (s, 1H), 4.60 (d,  $J = 14.2$  Hz, 1H), 4.52 (d,  $J = 14.2$  Hz, 1H), 4.10 – 3.97 (m, 1H), 3.97 – 3.88 (m, 1H), 2.24 (s, 3H), 2.21 (s, 3H), 1.52 – 1.43 (m, 2H), 1.34 – 1.25 (m, 2H), 0.89 (t,  $J = 7.3$  Hz, 3H).  $^{13}\text{C}$  NMR (100 MHz,  $\text{CDCl}_3$ )  $\delta$  166.1, 142.2, 140.1, 139.7, 139.2, 139.2, 136.9, 135.7, 132.4, 131.9, 129.8, 129.1, 100.2, 65.0, 50.2, 30.4, 20.4, 20.3, 19.1, 13.7. **HRMS (ESI)**  $m/z$  Calcd for  $[\text{C}_{22}\text{H}_{25}\text{ClINO}_4\text{S}, \text{M} + \text{H}]^+$ : 584.0130; Found: 584.0132.

**Optical Rotation:**  $[\alpha]_D^{25} - 15.0$  ( $c = 1.0$ ,  $\text{CHCl}_3$ ). 92% *ee* (HPLC conditions: Chiralpak OD-H column, *n*-Hexane/*i*-PrOH = 80:20, flow rate = 1.0 mL/min, wavelength = 254 nm,  $t_R = 5.660$  min for minor isomer,  $t_R = 5.172$  min for major isomer).

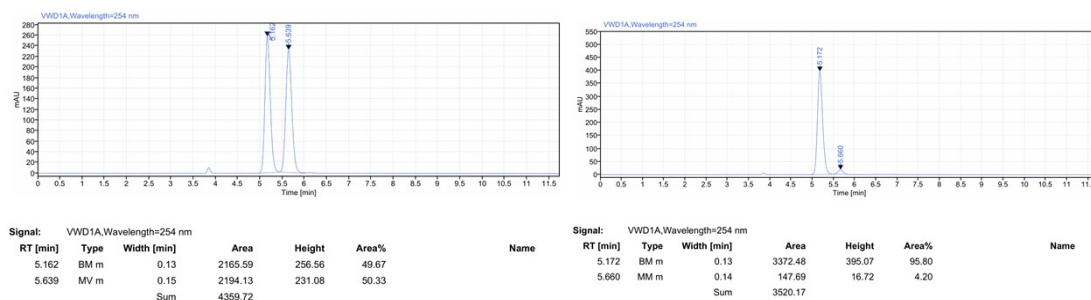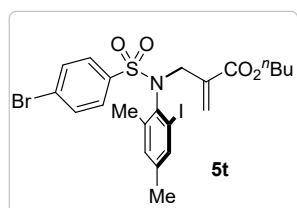

**5t.** (97% yield, Hexane-EtOAc = 5:1,  $R_f = 0.4$ ). Syrup.  $^1\text{H}$  NMR (400 MHz,  $\text{CDCl}_3$ )  $\delta$  7.72 (d,  $J = 8.7$  Hz, 2H), 7.63 (d,  $J = 8.7$  Hz, 2H), 7.49 (s, 1H), 7.00 (s, 1H), 6.29 (d,  $J = 0.8$  Hz, 1H), 5.79 (s, 1H), 4.59 (d,  $J = 14.2$  Hz, 1H), 4.52 (d,  $J = 14.2$  Hz, 1H), 4.01 (dt,  $J = 10.9, 6.6$  Hz, 1H), 3.92 (dt,  $J = 10.9, 6.6$  Hz, 1H), 2.23 (s, 3H), 2.20 (s, 3H), 1.51 – 1.43 (m, 2H), 1.33 – 1.25 (m, 2H), 0.88 (t,  $J = 7.3$  Hz, 3H).  $^{13}\text{C}$  NMR (100 MHz,  $\text{CDCl}_3$ )  $\delta$  166.0, 142.1, 140.2, 140.0, 139.1, 136.8, 135.6, 132.3, 132.1, 131.8, 129.8, 127.7, 100.2, 64.9, 50.2, 30.3, 20.4, 20.3, 19.0, 13.6. HRMS (ESI)  $m/z$  Calcd for  $[\text{C}_{22}\text{H}_{25}\text{BrINO}_4\text{S}, \text{M} + \text{Na}]^+$ : 627.9625; Found: 627.9630.

**Optical Rotation:**  $[\alpha]_D^{25} - 25.5$  ( $c = 1.0$ ,  $\text{CHCl}_3$ ). 90% *ee* (HPLC conditions: Chiralpak OD-H column, *n*-Hexane/*i*-PrOH = 80:20, flow rate = 1.0 mL/min, wavelength = 254 nm,  $t_R = 6.173$  min for minor isomer,  $t_R = 5.579$  min for major isomer).

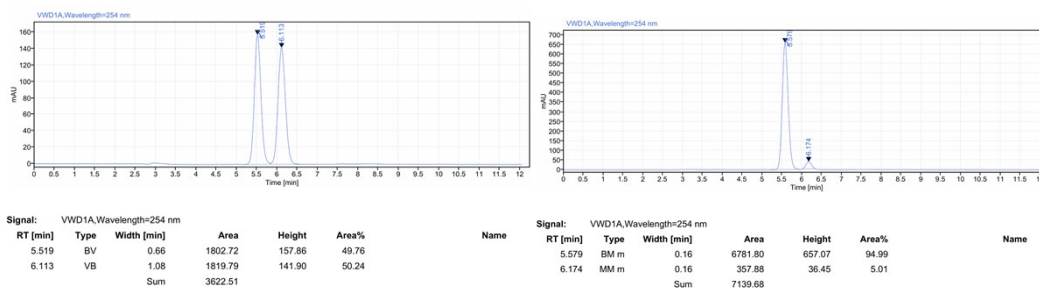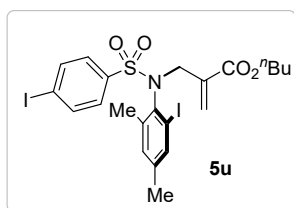

**5u.** (98% yield, Hexane-EtOAc = 5:1,  $R_f$  = 0.5). Syrup.  $^1\text{H}$  NMR (400 MHz,  $\text{CDCl}_3$ )  $\delta$  7.84 (d,  $J$  = 8.5 Hz, 2H), 7.57 (d,  $J$  = 8.5 Hz, 2H), 7.49 (s, 1H), 6.99 (s, 1H), 6.29 (d,  $J$  = 0.8 Hz, 1H), 5.79 (s, 1H), 4.59 (d,  $J$  = 14.2 Hz, 1H), 4.51 (d,  $J$  = 14.2 Hz, 1H), 4.00 (dt,  $J$  = 10.8, 6.8 Hz, 1H), 3.92 (dt,  $J$  = 10.8, 6.6 Hz, 1H), 2.22 (s, 3H), 2.20 (s, 3H), 1.50 – 1.43 (m, 2H), 1.33 – 1.24 (m, 2H), 0.88 (t,  $J$  = 7.4 Hz, 3H).  $^{13}\text{C}$  NMR (100 MHz,  $\text{CDCl}_3$ )  $\delta$  166.0, 142.1, 140.8, 140.0, 139.1, 138.0, 136.8, 135.6, 132.3, 131.8, 129.7, 100.2, 100.1, 64.9, 50.2, 30.3, 20.4, 20.3, 19.0, 13.6. HRMS (ESI)  $m/z$  Calcd for  $[\text{C}_{22}\text{H}_{25}\text{BrI}_2\text{NO}_4\text{S}, \text{M} + \text{Na}]^+$ : 675.9486; Found: 675.9491.

**Optical Rotation:**  $[\alpha]_D^{25} - 25.7$  ( $c$  = 1.0,  $\text{CHCl}_3$ ). 90% *ee* (HPLC conditions: Chiralpak OD-H column, *n*-Hexane/*i*-PrOH = 85:25, flow rate = 1.0 mL/min, wavelength = 254 nm,  $t_R$  = 6.114 min for minor isomer,  $t_R$  = 5.490 min for major isomer).

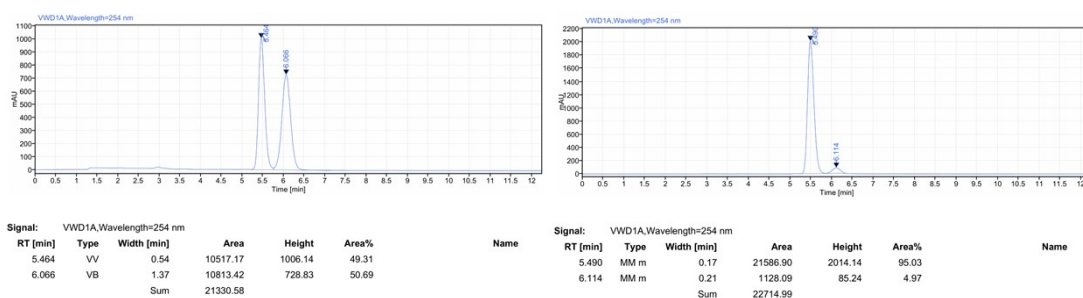

**Representative procedure for synthesis of 7:**



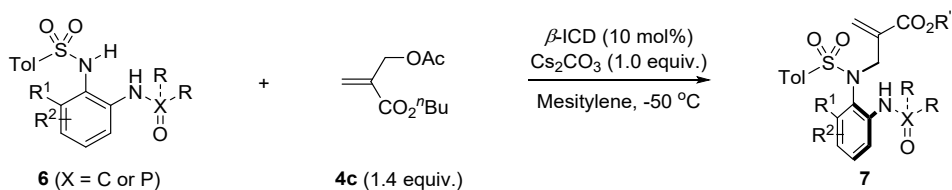

To a Schlenk tube containing **6**<sup>[4]</sup> (0.05 mmol),  $\beta$ -ICD (1.5 mg, 10 mol%) and  $\text{Cs}_2\text{CO}_3$  (0.05 mmol, 1.0 equiv.) were added mesitylene (3 mL) and MBH acetate **4c** (0.14 mmol, 1.4 equiv.). The reaction mixture was stirred at  $-50\text{ }^\circ\text{C}$  for 24 h. The solvent was removed by silica gel column chromatography and the residue was then purified by silica gel column chromatography with hexanes/ethyl acetate as the eluent to afford the product **7**.

### Characterization of compounds of **7**:

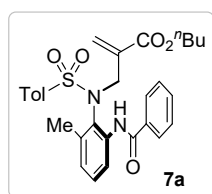

**7a**. (76% yield, Hexane-EtOAc = 3:1,  $R_f = 0.5$ ). Syrup.  $^1\text{H NMR}$  (400 MHz,  $\text{CDCl}_3$ )  $\delta$  9.15 (s, 1H), 8.07 (d,  $J = 8.2$  Hz, 1H), 7.85 (d,  $J = 7.4$  Hz, 2H), 7.55 (d,  $J = 8.2$  Hz, 2H), 7.48-7.44 (m, 1H), 7.41-7.38 (m, 2H), 7.19-7.14 (m, 3H), 6.82 (d,  $J = 7.5$  Hz, 1H), 6.03 (s, 1H), 5.53 (s, 1H), 4.72 (d,  $J = 14.0$  Hz, 1H), 4.02 (d,  $J = 14.0$  Hz, 1H), 3.72 – 3.54 (m, 2H), 2.31 (s, 3H), 1.60 (s, 3H), 1.33-1.26 (m, 2H), 1.15-1.06 (m, 2H), 0.75 (t,  $J = 7.3$  Hz, 3H).  $^{13}\text{C NMR}$  (100 MHz,  $\text{CDCl}_3$ )  $\delta$  165.6, 165.0, 144.2, 138.5, 138.3, 136.1, 135.2, 134.4, 131.7, 130.9, 129.7, 129.2, 128.5, 127.8, 127.8, 127.4, 127.1, 121.7, 64.8, 51.1, 30.2, 21.5, 18.9, 17.9, 13.6. **HRMS (ESI)**  $m/z$  Calcd for  $[\text{C}_{29}\text{H}_{32}\text{N}_2\text{O}_5\text{S}, \text{M} + \text{Na}]^+$ : 543.1924; Found: 543.1929.

**Optical Rotation:**  $[\alpha]^{25}_{\text{D}}$  60.0 ( $c = 1.0$ ,  $\text{CHCl}_3$ ). 84% *ee* (HPLC conditions: Chiralpak AD-H column, *n*-Hexane/*i*-PrOH = 70:30, flow rate = 1.0 mL/min, wavelength = 254 nm,  $t_R = 10.116$  min for minor isomer,  $t_R = 7.849$  min for major isomer).

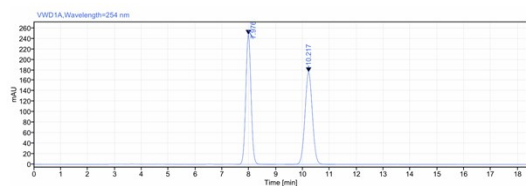

| Signal: VWD1A,Wavelength=254 nm |      |             |         |        |       |
|---------------------------------|------|-------------|---------|--------|-------|
| RT [min]                        | Type | Width [min] | Area    | Height | Area% |
| 7.976                           | BB   | 1.42        | 3363.98 | 247.26 | 49.99 |
| 10.217                          | BB   | 1.87        | 3364.89 | 175.73 | 50.01 |
|                                 | Sum  |             | 6728.87 |        |       |

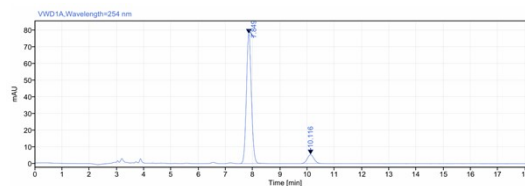

| Signal: VWD1A,Wavelength=254 nm |      |             |         |        |       |
|---------------------------------|------|-------------|---------|--------|-------|
| RT [min]                        | Type | Width [min] | Area    | Height | Area% |
| 7.849                           | BB   | 0.80        | 986.53  | 78.00  | 91.79 |
| 10.116                          | MM m | 0.26        | 88.20   | 5.25   | 8.21  |
|                                 | Sum  |             | 1074.73 |        |       |

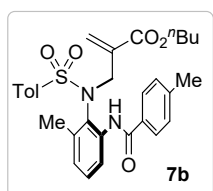

**7b.** (81% yield, Hexane-EtOAc = 3:1,  $R_f = 0.4$ ). Syrup.  $^1\text{H NMR}$  (400 MHz,  $\text{CDCl}_3$ )  $\delta$  9.11 (s, 1H), 8.06 (d,  $J = 8.0$  Hz, 1H), 7.74 (d,  $J = 8.2$  Hz, 2H), 7.56 (d,  $J = 8.2$  Hz, 2H), 7.20 (d,  $J = 7.8$  Hz, 3H), 7.16 (d,  $J = 8.4$  Hz, 2H), 6.81 (d,  $J = 7.5$  Hz, 1H), 6.03 (s, 1H), 5.53 (s, 1H), 4.71 (d,  $J = 14.0$  Hz, 1H), 4.02 (d,  $J = 14.0$  Hz, 1H), 3.71-3.58 (m, 2H), 2.35 (s, 3H), 2.32 (s, 3H), 1.59 (s, 3H), 1.34 – 1.26 (m, 2H), 1.16-1.06 (m, 2H), 0.75 (t,  $J = 7.4$  Hz, 3H).  $^{13}\text{C NMR}$  (100 MHz,  $\text{CDCl}_3$ )  $\delta$  165.6, 165.0, 144.2, 142.2, 138.5, 138.4, 136.1, 135.2, 131.6, 131.0, 129.7, 129.2, 129.2, 127.8, 127.7, 127.4, 127.0, 121.7, 64.9, 51.1, 30.2, 21.6, 21.5, 18.9, 17.9, 13.6. **HRMS (ESI)**  $m/z$  Calcd for  $[\text{C}_{30}\text{H}_{34}\text{N}_2\text{O}_4\text{S}, \text{M} + \text{Na}]^+$ : 557.2081; Found: 557.2085.

**Optical Rotation:**  $[\alpha]_D^{25}$  51.0 ( $c = 1.0$ ,  $\text{CHCl}_3$ ). 86% *ee* (HPLC conditions: Chiralpak AD-H column, *n*-Hexane/*i*-PrOH = 80:20, flow rate = 1.0 mL/min, wavelength = 254 nm,  $t_R = 21.846$  min for minor isomer,  $t_R = 14.998$  min for major isomer).

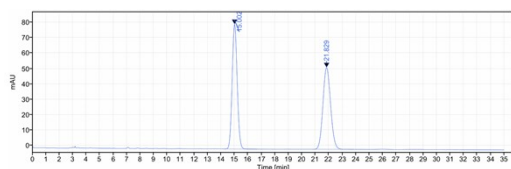

| Signal: VWD1A,Wavelength=254 nm |      |             |         |        |       |
|---------------------------------|------|-------------|---------|--------|-------|
| RT [min]                        | Type | Width [min] | Area    | Height | Area% |
| 15.002                          | BB   | 2.44        | 2104.92 | 81.80  | 50.01 |
| 21.829                          | BB   | 3.04        | 2104.09 | 53.10  | 49.99 |
|                                 | Sum  |             | 4209.01 |        |       |

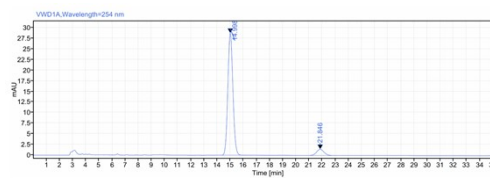

| Signal: VWD1A,Wavelength=254 nm |      |             |        |        |       |
|---------------------------------|------|-------------|--------|--------|-------|
| RT [min]                        | Type | Width [min] | Area   | Height | Area% |
| 14.998                          | BB   | 1.99        | 769.83 | 28.74  | 92.86 |
| 21.846                          | MM m | 0.58        | 59.22  | 1.47   | 7.14  |
|                                 | Sum  |             | 829.05 |        |       |

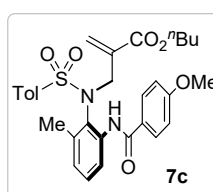

**7c.** (45% yield, Hexane-EtOAc = 3:1,  $R_f = 0.4$ ). Syrup.  $^1\text{H NMR}$  (400 MHz,  $\text{CDCl}_3$ )  $\delta$  9.15 (s, 1H), 8.12 (d,  $J = 8.0$  Hz, 1H), 7.89 (d,  $J = 8.8$  Hz, 2H), 7.63 (d,  $J = 8.2$  Hz, 2H), 7.26 – 7.15 (m, 3H),

6.96 (d,  $J = 8.8$  Hz, 2H), 6.86 (d,  $J = 7.4$  Hz, 1H), 6.10 (s, 1H), 5.58 (s, 1H), 4.79 (d,  $J = 14.0$  Hz, 1H), 4.07 (d,  $J = 14.0$  Hz, 1H), 3.86 (s, 3H), 3.76 (dt,  $J = 10.9, 6.8$  Hz, 1H), 3.68 (dt,  $J = 10.9, 6.8$  Hz, 1H), 2.39 (s, 3H), 1.65 (s, 3H), 1.42 – 1.31 (m, 2H), 1.18 (dq,  $J = 14.5, 7.3$  Hz, 2H), 0.82 (t,  $J = 7.3$  Hz, 3H).  $^{13}\text{C}$  NMR (100 MHz,  $\text{CDCl}_3$ )  $\delta$  165.6, 164.6, 162.4, 144.2, 138.4, 136.1, 135.1, 130.9, 129.7, 129.3, 129.1, 127.8, 127.6, 126.8, 126.7, 121.6, 113.7, 64.8, 55.4, 51.0, 30.2, 21.5, 18.9, 17.9, 13.6. **HRMS (ESI)**  $m/z$  Calcd for  $[\text{C}_{30}\text{H}_{34}\text{N}_2\text{O}_6\text{S}, \text{M} + \text{Na}]^+$ : 573.2030; Found: 573.2034.

**Optical Rotation:**  $[\alpha]^{25}_{\text{D}}$  34.0 ( $c = 1.0$ ,  $\text{CHCl}_3$ ). 76% *ee* (HPLC conditions: Chiralpak AD-H column, *n*-Hexane/*i*-PrOH = 70:30, flow rate = 1.0 mL/min, wavelength = 254 nm,  $t_{\text{R}} = 20.637$  min for minor isomer,  $t_{\text{R}} = 12.800$  min for major isomer).

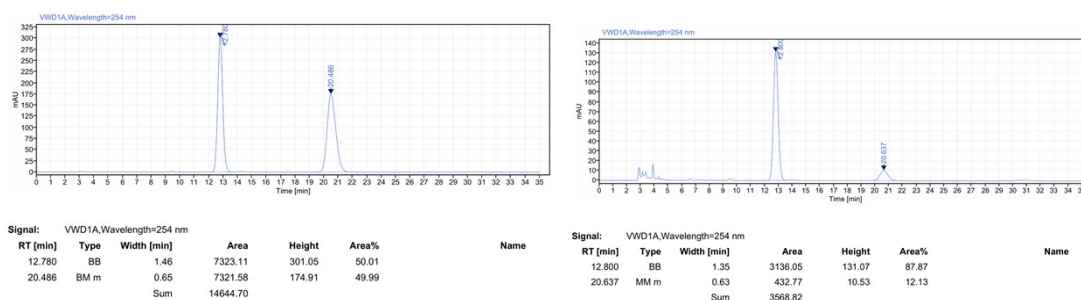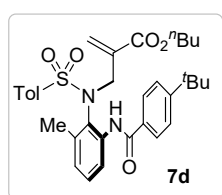

**7d.** (74% yield, Hexane-EtOAc = 3:1,  $R_f = 0.4$ ). Syrup.  $^1\text{H}$  NMR (400 MHz,  $\text{CDCl}_3$ )  $\delta$  9.20 (s, 1H), 8.13 (d,  $J = 8.2$  Hz, 1H), 7.85 (d,  $J = 8.5$  Hz, 2H), 7.64 (d,  $J = 8.2$  Hz, 2H), 7.48 (d,  $J = 8.5$  Hz, 2H), 7.27 – 7.21 (m, 3H), 6.88 (d,  $J = 7.5$  Hz, 1H), 6.10 (s, 1H), 5.58 (s, 1H), 4.78 (d,  $J = 14.0$  Hz, 1H), 4.09 (d,  $J = 14.0$  Hz, 1H), 3.74 (dt,  $J = 10.8, 6.8$  Hz, 1H), 3.65 (dt,  $J = 10.8, 6.8$  Hz, 1H), 2.39 (s, 3H), 1.66 (s, 3H), 1.42 – 1.28 (m, 11H), 1.17 (dq,  $J = 14.4, 7.4$  Hz, 2H), 0.81 (t,  $J = 7.4$  Hz, 3H).  $^{13}\text{C}$  NMR (100 MHz,  $\text{CDCl}_3$ )  $\delta$  165.6, 164.9, 155.2, 144.1, 138.5, 138.4, 136.1, 135.1, 131.4, 131.0, 129.7, 129.1, 127.8, 127.7, 127.2, 127.0, 125.5, 121.7, 64.8, 51.0, 34.9, 31.1, 30.2, 21.5, 18.9, 17.9, 13.6. **HRMS (ESI)**  $m/z$  Calcd for  $[\text{C}_{33}\text{H}_{40}\text{N}_2\text{O}_5\text{S}, \text{M} + \text{Na}]^+$ : 599.2550; Found: 599.2554.

**Optical Rotation:**  $[\alpha]^{25}_D$  45.0 ( $c = 1.0$ ,  $\text{CHCl}_3$ ). 89% *ee* (HPLC conditions: Chiralpak OZ-H column, *n*-Hexane/*i*-PrOH = 80:20, flow rate = 1.0 mL/min, wavelength = 254 nm,  $t_R = 16.263$  min for minor isomer,  $t_R = 10.780$  min for major isomer).

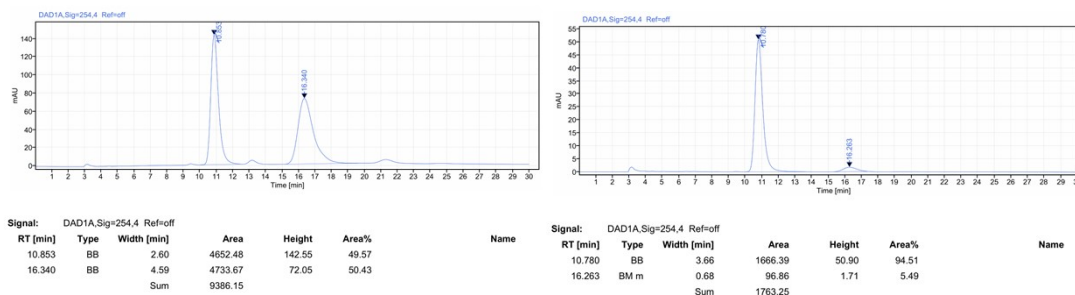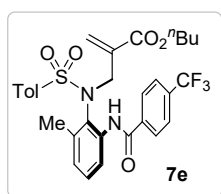

**7e.** (55% yield, Hexane-EtOAc = 3:1,  $R_f = 0.4$ ). Syrup.  $^1\text{H NMR}$  (400 MHz,  $\text{CDCl}_3$ )  $\delta$  9.33 (s, 1H), 8.10 (d,  $J = 8.1$  Hz, 1H), 8.03 (d,  $J = 8.1$  Hz, 2H), 7.71 (d,  $J = 8.2$  Hz, 2H), 7.57 (d,  $J = 8.2$  Hz, 2H), 7.23 (d,  $J = 7.7$  Hz, 1H), 7.18 (d,  $J = 8.1$  Hz, 2H), 6.87 (d,  $J = 7.5$  Hz, 1H), 6.07 (s, 1H), 5.58 (s, 1H), 4.79 (d,  $J = 13.9$  Hz, 1H), 3.99 (d,  $J = 13.9$  Hz, 1H), 3.74 – 3.55 (m, 2H), 2.35 (s, 3H), 1.62 (s, 3H), 1.35 – 1.27 (m, 2H), 1.12 (dq,  $J = 14.4, 7.3$  Hz, 2H), 0.77 (t,  $J = 7.3$  Hz, 3H).  $^{13}\text{C NMR}$  (100 MHz,  $\text{CDCl}_3$ )  $\delta$  165.6, 163.7, 144.3, 138.5, 138.0, 137.7, 135.9, 135.2, 133.3 ( $^2J_{C-F} = 32.5$  Hz), 131.1, 129.7, 129.3, 127.9, 127.9, 127.7, 127.5, 125.6 ( $^3J_{C-F} = 3.8$  Hz), 123.7 ( $^1J_{C-F} = 270.8$  Hz), 121.5, 64.9, 51.3, 30.2, 21.5, 18.9, 17.9, 13.5.  $^{19}\text{F NMR}$  (376 MHz,  $\text{CDCl}_3$ ) 62.94. **HRMS (ESI)**  $m/z$  Calcd for  $[\text{C}_{30}\text{H}_{31}\text{F}_3\text{N}_2\text{O}_5\text{S}, \text{M} + \text{Na}]^+$ : 599.2550; Found: 599.2554.

**Optical Rotation:**  $[\alpha]^{25}_D$  32.0 ( $c = 1.0$ ,  $\text{CHCl}_3$ ). 78% *ee* (HPLC conditions: Chiralpak AD-H column, *n*-Hexane/*i*-PrOH = 70:30, flow rate = 1.0 mL/min, wavelength = 254 nm,  $t_R = 13.026$  min for minor isomer,  $t_R = 8.474$  min for major isomer).

**Figure 50.** HPLC Trace of **7e**.

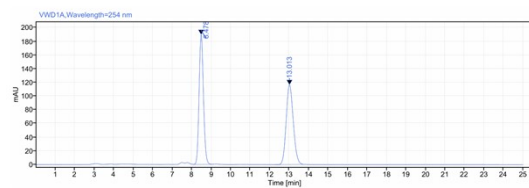

| Signal: VWD1A,Wavelength=254 nm |      |             |         |        |       |      |
|---------------------------------|------|-------------|---------|--------|-------|------|
| RT [min]                        | Type | Width [min] | Area    | Height | Area% | Name |
| 8.478                           | VB   | 0.95        | 2937.87 | 189.33 | 49.95 |      |
| 13.013                          | BM m | 0.39        | 2943.35 | 116.35 | 50.05 |      |
|                                 | Sum  |             | 5881.21 |        |       |      |

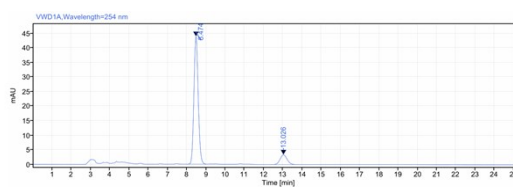

| Signal: VWD1A,Wavelength=254 nm |      |             |        |        |       |      |
|---------------------------------|------|-------------|--------|--------|-------|------|
| RT [min]                        | Type | Width [min] | Area   | Height | Area% | Name |
| 8.474                           | BB   | 1.12        | 662.31 | 43.92  | 88.92 |      |
| 13.026                          | BB   | 1.57        | 85.03  | 3.35   | 11.08 |      |
|                                 | Sum  |             | 747.34 |        |       |      |

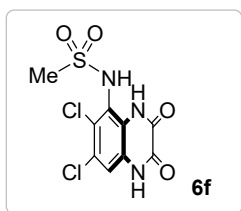

**6f**<sup>[5]</sup>. (85% yield). Yellow solid. **MP**: 91-92 °C. <sup>1</sup>H NMR (400 MHz, DMSO) δ 12.12 (s, 1H), 11.04 (s, 1H), 9.49 (s, 1H), 7.29 (s, 1H), 3.16 (s, 3H). <sup>13</sup>C NMR (100 MHz, DMSO) δ 154.7, 154.5, 126.6, 126.2, 125.3, 121.5, 115.1, 41.7. **HRMS (ESI)**

m/z Calcd for [C<sub>9</sub>H<sub>7</sub>Cl<sub>2</sub>N<sub>3</sub>O<sub>4</sub>S, M + Na]<sup>+</sup>: 345.9427, 347.9396; Found: 345.9428, 347.9400.

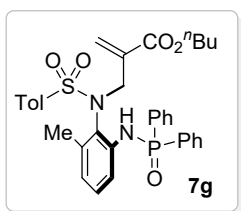

**7g**. (38% yield, Hexane-EtOAc = 2:1, R<sub>f</sub> = 0.4). Syrup. <sup>1</sup>H NMR (400 MHz, CDCl<sub>3</sub>) δ 8.01 – 7.90 (m, 2H), 7.89 – 7.81 (m, 2H), 7.59 (d, *J* = 8.2 Hz, 2H), 7.48 – 7.35 (m, 6H), 7.13 (d, *J* = 8.1 Hz, 2H), 7.01 (d, *J* = 8.1 Hz, 1H), 6.85 – 6.81 (m, 1H), 6.54 (d, *J* =

7.4 Hz, 1H), 6.42 (d, *J* = 10.6 Hz, 1H), 6.06 (s, 1H), 5.56 (s, 1H), 4.58 (d, *J* = 14.1 Hz, 1H), 4.04 (d, *J* = 14.1 Hz, 1H), 3.85 – 3.69 (m, 2H), 2.33 (s, 3H), 1.65 (s, 3H), 1.44 – 1.32 (m, 2H), 1.22 – 1.16 (m, 2H), 0.80 (s, 3H). <sup>13</sup>C NMR (100 MHz, CDCl<sub>3</sub>) δ 165.8, 144.0, 141.2, 138.8, 136.3, 135.5, 132.4 (<sup>1</sup>*J*<sub>C-P</sub> = 128.3 Hz), 132.2 (<sup>2</sup>*J*<sub>C-P</sub> = 10.2 Hz), 132.0 (<sup>1</sup>*J*<sub>C-P</sub> = 128.9 Hz), 132.0 (<sup>3</sup>*J*<sub>C-P</sub> = 2.5 Hz), 131.9 (<sup>3</sup>*J*<sub>C-P</sub> = 2.7 Hz), 131.5 (<sup>2</sup>*J*<sub>C-P</sub> = 10 Hz), 130.9, 129.7, 129.1, 128.5 (<sup>2</sup>*J*<sub>C-P</sub> = 24.7 Hz), 128.6, 128.5, 127.9, 125.9 (<sup>3</sup>*J*<sub>C-P</sub> = 8.5 Hz), 123.7, 116.5 (<sup>3</sup>*J*<sub>C-P</sub> = 4.7 Hz), 65.0, 50.6, 30.3, 21.6, 19.0, 18.4, 13.7. <sup>31</sup>P NMR (162 MHz, CDCl<sub>3</sub>) 18.02 (d, *J* = 11.1 Hz). **HRMS (ESI)** m/z Calcd for [C<sub>34</sub>H<sub>37</sub>N<sub>2</sub>O<sub>5</sub>PS, M + Na]<sup>+</sup>: 639.2053; Found: 639.2058.

**Optical Rotation**: [α]<sub>D</sub><sup>25</sup> 48.0 (*c* = 1.0, CHCl<sub>3</sub>). 66% *ee* (HPLC conditions: Chiralpak AD-H column, *n*-Hexane/*i*-PrOH = 70:30, flow rate = 1.0 mL/min, wavelength = 254

nm,  $t_R = 9.723$  min for minor isomer,  $t_R = 12.157$  min for major isomer).

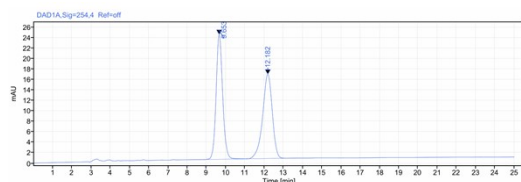

| RT [min] | Type | Width [min] | Area    | Height | Area% | Name |
|----------|------|-------------|---------|--------|-------|------|
| 9.653    | BB   | 2.13        | 561.71  | 23.76  | 50.16 |      |
| 12.162   | BB   | 1.99        | 558.02  | 16.03  | 49.84 |      |
|          | Sum  |             | 1119.74 |        |       |      |

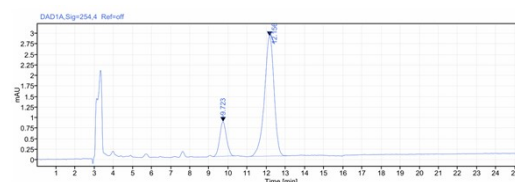

| RT [min] | Type | Width [min] | Area   | Height | Area% | Name |
|----------|------|-------------|--------|--------|-------|------|
| 9.723    | MM m | 0.32        | 20.06  | 0.82   | 16.83 |      |
| 12.156   | BB   | 1.91        | 99.10  | 2.84   | 83.17 |      |
|          | Sum  |             | 119.15 |        |       |      |

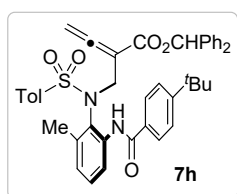

**7h.** (53% yield, Hexane-EtOAc = 5:1,  $R_f = 0.5$ ). Syrup.  $^1\text{H NMR}$

(400 MHz,  $\text{CDCl}_3$ )  $\delta$  9.11 (s, 1H), 8.21 (d,  $J = 8.2$  Hz, 1H), 7.75 (d,  $J = 8.4$  Hz, 2H), 7.64 (d,  $J = 8.2$  Hz, 2H), 7.40 (d,  $J = 8.4$  Hz, 2H), 7.27– 7.22 (m, 4H), 7.21 – 7.13 (m, 7H), 7.12 – 7.04 (m,

2H), 6.83 (d,  $J = 7.3$  Hz, 1H), 6.48 (s, 1H), 4.92 (d,  $J = 14.9$  Hz, 1H), 4.86 (d,  $J = 14.9$  Hz, 1H), 4.73 (d,  $J = 13.8$  Hz, 1H), 4.19 (d,  $J = 13.8$  Hz, 1H), 2.34 (s, 3H), 1.64 (s, 3H), 1.35 (s, 9H).  $^{13}\text{C NMR}$  (100 MHz,  $\text{CDCl}_3$ )  $\delta$  215.9, 164.8, 164.8, 155.0, 144.0, 140.0, 139.8, 138.9, 138.5, 136.2, 131.4, 129.7, 129.2, 128.3, 128.2, 127.7, 127.6, 127.3, 127.2, 127.0, 126.7, 126.5, 125.3, 121.0, 95.6, 79.9, 77.6, 49.1, 34.9, 31.1, 21.5, 18.1. **HRMS (ESI)**  $m/z$  Calcd for  $[\text{C}_{43}\text{H}_{42}\text{IN}_2\text{O}_5\text{S}, \text{M}+\text{Na}]^+$ : 721.2707; Found: 721.2711.

**Optical Rotation:**  $[\alpha]_D^{25} -7.2$  ( $c = 0.5$ ,  $\text{CHCl}_3$ ). 16% *ee* (HPLC conditions: Chiralpak

AD-H column, *n*-Hexane/*i*-PrOH = 80:20, flow rate = 1.0 mL/min, wavelength = 254

nm,  $t_R = 16.569$  min for minor isomer,  $t_R = 8.867$  min for major isomer).

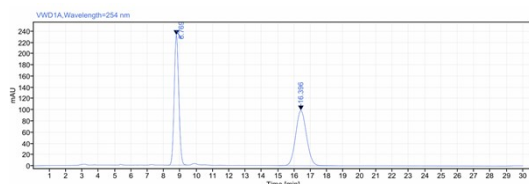

| RT [min] | Type | Width [min] | Area    | Height | Area% | Name |
|----------|------|-------------|---------|--------|-------|------|
| 8.769    | BB   | 1.27        | 4522.29 | 231.69 | 49.95 |      |
| 16.396   | BB   | 4.02        | 4531.20 | 98.22  | 50.05 |      |
|          | Sum  |             | 9053.49 |        |       |      |

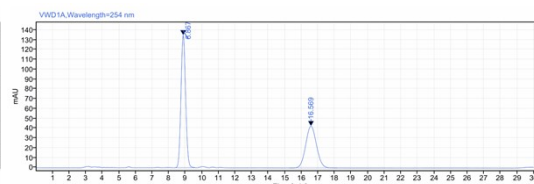

| RT [min] | Type | Width [min] | Area    | Height | Area% | Name |
|----------|------|-------------|---------|--------|-------|------|
| 8.867    | BB   | 1.31        | 2625.78 | 134.70 | 57.76 |      |
| 16.569   | BM m | 0.70        | 1919.99 | 42.53  | 42.24 |      |
|          | Sum  |             | 4545.77 |        |       |      |

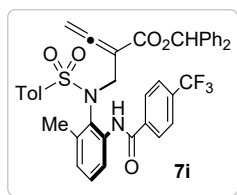

**7i.** (46% yield, Hexane-EtOAc = 5:1,  $R_f = 0.5$ ). Syrup.  $^1\text{H NMR}$  (400 MHz,  $\text{CDCl}_3$ )  $\delta$  9.12 (s, 1H), 8.19 (d,  $J = 8.0$  Hz, 1H), 7.83 (d,  $J = 8.3$  Hz, 2H), 7.61 (d,  $J = 8.3$  Hz, 2H), 7.57 (d,  $J = 8.3$  Hz, 2H), 7.29 (d,  $J = 8.0$  Hz, 1H), 7.26 – 7.21 (m, 3H), 7.20 – 7.11 (m, 7H), 7.08 – 7.03 (m, 2H), 6.89 (d,  $J = 7.5$  Hz, 1H), 6.47 (s, 1H), 4.97 (d,  $J = 14.9$  Hz, 1H), 4.91 (d,  $J = 14.9$  Hz, 1H), 4.84 (d,  $J = 13.6$  Hz, 1H), 4.10 (d,  $J = 13.6$  Hz, 1H), 2.32 (s, 3H), 1.71 (s, 3H).  $^{13}\text{C NMR}$  (100 MHz,  $\text{CDCl}_3$ )  $\delta$  216.1, 165.0, 163.5, 144.2, 139.9, 139.7, 138.9, 138.2, 137.4, 136.2, 132.9 ( $^2J_{\text{C-F}} = 32.3$  Hz), 129.7, 129.3, 128.4, 128.3, 127.9, 127.8, 127.7, 127.3, 127.2, 126.9, 126.2, 125.3 ( $^3J_{\text{C-F}} = 3.7$  Hz), 123.7 ( $^1J_{\text{C-F}} = 270.9$  Hz), 120.9, 95.4, 79.7, 77.7, 49.2, 21.5, 18.1.  $^{19}\text{F NMR}$  (376 MHz,  $\text{CDCl}_3$ ) 62.83. **HRMS (ESI)**  $m/z$  Calcd for  $[\text{C}_{40}\text{H}_{33}\text{F}_3\text{N}_2\text{O}_5\text{S}, \text{M} + \text{Na}]^+$ : 733.1954; Found: 733.1959.

**Optical Rotation:**  $[\alpha]_D^{25} -6.6$  ( $c = 0.5$ ,  $\text{CHCl}_3$ ). 42% *ee* (HPLC conditions: Chiralpak AD-H column, *n*-Hexane/*i*-PrOH = 70:30, flow rate = 1.0 mL/min, wavelength = 254 nm,  $t_R = 12.534$  min for minor isomer,  $t_R = 21.435$  min for major isomer).

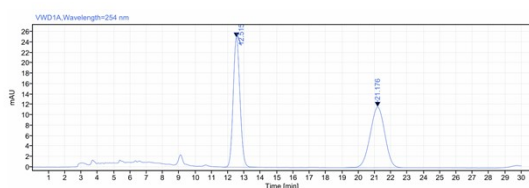

| Signal: VWD1A,Wavelength=254 nm |      |             |         |        |       | Signal: VWD1A,Wavelength=254 nm |      |             |         |        |       |
|---------------------------------|------|-------------|---------|--------|-------|---------------------------------|------|-------------|---------|--------|-------|
| RT [min]                        | Type | Width [min] | Area    | Height | Area% | RT [min]                        | Type | Width [min] | Area    | Height | Area% |
| 12.515                          | BB   | 2.26        | 719.69  | 24.89  | 49.85 | 12.534                          | BB   | 2.21        | 878.16  | 31.00  | 29.01 |
| 21.176                          | BB   | 3.65        | 723.92  | 11.65  | 50.15 | 21.435                          | BB   | 3.58        | 2148.75 | 36.68  | 70.99 |
| Sum                             |      |             | 1443.62 |        |       | Sum                             |      |             | 3026.90 |        |       |

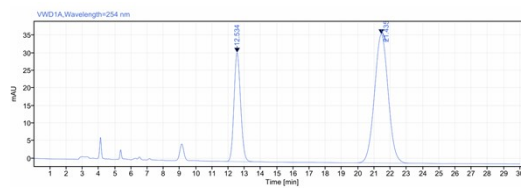

| Signal: VWD1A,Wavelength=254 nm |      |             |         |        |       | Signal: VWD1A,Wavelength=254 nm |      |             |         |        |       |
|---------------------------------|------|-------------|---------|--------|-------|---------------------------------|------|-------------|---------|--------|-------|
| RT [min]                        | Type | Width [min] | Area    | Height | Area% | RT [min]                        | Type | Width [min] | Area    | Height | Area% |
| 12.515                          | BB   | 2.26        | 719.69  | 24.89  | 49.85 | 12.534                          | BB   | 2.21        | 878.16  | 31.00  | 29.01 |
| 21.176                          | BB   | 3.65        | 723.92  | 11.65  | 50.15 | 21.435                          | BB   | 3.58        | 2148.75 | 36.68  | 70.99 |
| Sum                             |      |             | 1443.62 |        |       | Sum                             |      |             | 3026.90 |        |       |

### Representative procedure for synthesis of 8:

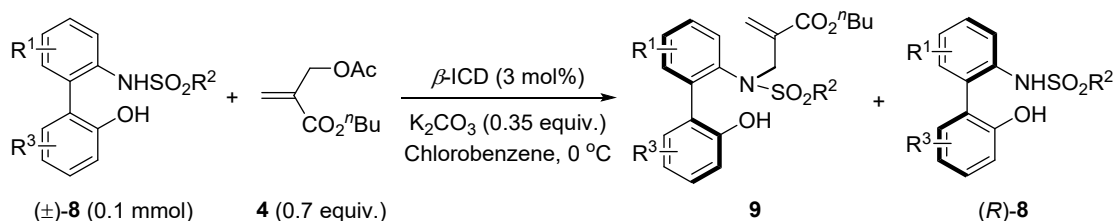

To a Schlenk tube containing *rac*-**8** (0.1 mmol),  $\beta$ -ICD (1.0 mg, 3 mol%) and  $K_2CO_3$  (0.035 mmol, 0.35 equiv.) were added chlorobenzene (8 mL) and MBH acetate **4** (0.07 mmol, 0.7 equiv.). The reaction mixture was allowed to stir at 0 °C for 72 h. The solvent was removed by silica gel column chromatography and the residue was then purified by silica gel column chromatography to afford the product **9** and unreacted starting material **8**.

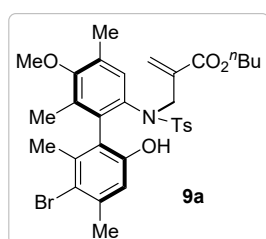

**9a.** (56% yield, Hexane-EtOAc = 5:1,  $R_f$  = 0.4). Syrup.  $^1H$  NMR (400 MHz, DMSO- $d_6$ )  $\delta$  9.32 (s, 1H), 7.43 (d,  $J$  = 8.1 Hz, 2H), 7.31 (d,  $J$  = 8.1 Hz, 2H), 6.74 (s, 1H), 6.70 (s, 1H), 5.96 (s, 1H), 5.35 (s, 1H), 4.18 (d,  $J$  = 16.7 Hz, 1H), 3.96 (t,  $J$  = 6.6 Hz, 2H), 3.89 (d,  $J$  = 16.7 Hz, 1H), 2.39 (s, 3H), 2.36 (s, 3H), 2.19 (s, 3H), 1.96 (s, 3H), 1.78 (s, 3H), 1.55 – 1.42 (m, 2H), 1.32 – 1.23 (m, 2H), 0.86 (t,  $J$  = 7.3 Hz, 3H).  $^{13}C$  NMR (100 MHz, DMSO- $d_6$ )  $\delta$  165.5, 156.1, 153.3, 143.5, 137.5, 137.3, 137.0, 136.2, 135.0, 134.3, 131.1, 130.4, 129.4, 129.4, 128.2, 127.8, 124.0, 116.8, 115.2, 64.1, 59.6, 50.3, 30.0, 23.7, 21.3, 21.0, 18.6, 15.7, 13.6, 13.1. HRMS (ESI)  $m/z$  Calcd for  $[C_{32}H_{38}BrNO_6S, M + Na]^+$ : 666.1495, 668.1480; Found: 666.1497, 668.1481.

**Optical Rotation:**  $[\alpha]^{25}_D$  90.0 ( $c$  = 1.0,  $CHCl_3$ ). 80% *ee* (HPLC conditions: Chiralpak AD-H column, *n*-Hexane/*i*-PrOH = 80:20, flow rate = 1.0 mL/min, wavelength = 254 nm,  $t_R$  = 10.349 min for minor isomer,  $t_R$  = 5.710 min for major isomer).

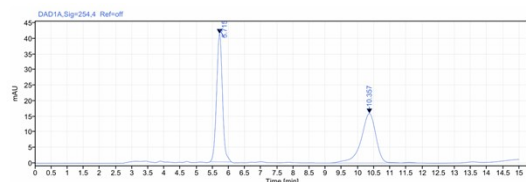

| RT [min] | Type | Width [min] | Area    | Height | Area% |
|----------|------|-------------|---------|--------|-------|
| 5.715    | MM m | 0.20        | 518.24  | 41.06  | 50.44 |
| 10.357   | MM m | 0.48        | 509.24  | 15.89  | 49.56 |
| Sum      |      |             | 1027.49 |        |       |

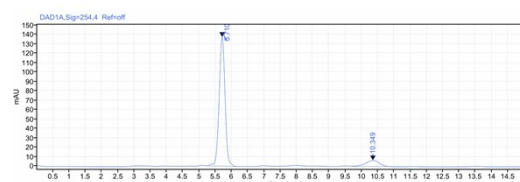

| RT [min] | Type | Width [min] | Area    | Height | Area% |
|----------|------|-------------|---------|--------|-------|
| 5.710    | MM m | 0.20        | 1738.97 | 137.10 | 90.08 |
| 10.349   | VM m | 0.45        | 191.52  | 6.45   | 9.92  |
| Sum      |      |             | 1930.49 |        |       |



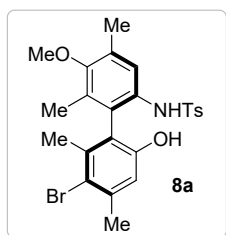

**8a.** (38% yield, Hexane-EtOAc = 2:1,  $R_f$  = 0.4). Syrup.  $^1\text{H}$  NMR (400 MHz,  $\text{CDCl}_3$ )  $\delta$  7.55 (d,  $J$  = 8.0 Hz, 2H), 7.41 (s, 1H), 7.22 (d,  $J$  = 8.0 Hz, 2H), 6.76 (s, 1H), 6.08 (s, 1H), 4.41 (s, 1H), 3.67 (s, 3H), 2.43 (s, 3H), 2.40 (s, 3H), 2.31 (s, 3H), 1.80 (s, 3H), 1.70 (s, 3H).  $^{13}\text{C}$  NMR (100 MHz,  $\text{CDCl}_3$ )  $\delta$  154.3, 151.6, 144.0, 140.3, 137.7, 136.3, 132.7, 131.8, 131.1, 129.7, 127.1, 124.1, 120.4, 120.0, 119.4, 115.7, 60.0, 24.2, 21.5, 20.4, 16.5, 13.1. **HRMS (ESI)**  $m/z$  Calcd for  $[\text{C}_{24}\text{H}_{26}\text{BrNO}_4\text{S}, \text{M} + \text{Na}]^+$ : 526.0658, 528.0640; Found: 526.0661, 528.0644.

**Optical Rotation:**  $[\alpha]_D^{25}$  -34.0 ( $c$  = 1.0,  $\text{CHCl}_3$ ). 96% *ee* (HPLC conditions: Chiralpak AD-H column, *n*-Hexane/*i*-PrOH = 80:20, flow rate = 1.0 mL/min, wavelength = 254 nm,  $t_R$  = 4.978 min for minor isomer,  $t_R$  = 8.937 min for major isomer).

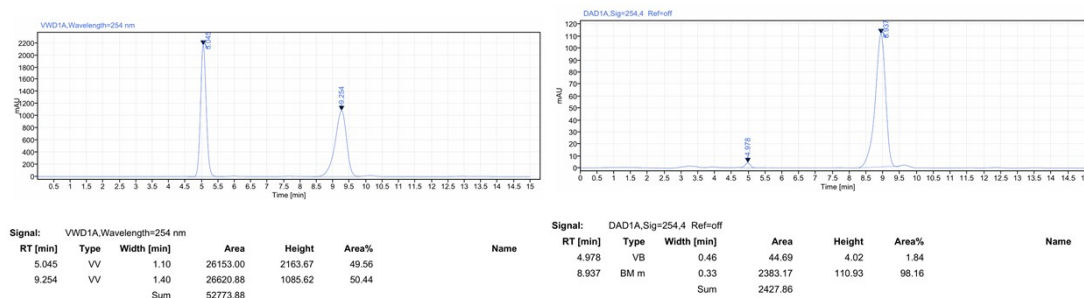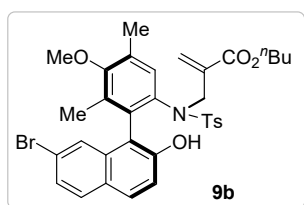

**9b.** (58% yield, Hexane-EtOAc = 5:1,  $R_f$  = 0.5) Syrup.  $^1\text{H}$  NMR (400 MHz,  $\text{DMSO-d}_6$ )  $\delta$  9.75 (s, 1H), 7.84 (d,  $J$  = 8.9 Hz, 1H), 7.79 (t,  $J$  = 9.4 Hz, 1H), 7.38 (d,  $J$  = 8.9 Hz, 1H), 7.25 (d,  $J$  = 8.9 Hz, 2H), 7.20 – 6.97 (m, 4H), 6.88 (s, 1H), 5.84 (s, 1H), 5.13 (s, 1H), 4.14– 4.02 (m, 1H), 3.95 (t,  $J$  = 6.5 Hz, 2H), 3.83 (d,  $J$  = 16.7 Hz, 1H), 3.71 (s, 3H), 2.31 (s, 3H), 2.28 (s, 3H), 1.71 (s, 3H), 1.52 – 1.43 (m, 2H), 1.29– 1.22 (m, 2H), 0.86 (t,  $J$  = 7.3 Hz, 3H).  $^{13}\text{C}$  NMR (100 MHz,  $\text{DMSO-d}_6$ )  $\delta$  165.6, 156.1, 151.9, 135.7, 135.2, 135.2, 135.0, 133.3, 131.8, 131.7, 129.6, 129.4, 128.9, 127.9, 127.7, 127.7, 127.6, 126.1, 126.1, 124.1, 122.7, 118.3, 117.1, 64.1, 59.5,

54.9, 49.6, 30.0, 18.6, 15.9, 13.6, 13.0. **HRMS (ESI)**  $m/z$  Calcd for  $[C_{34}H_{36}BrNO_6S, M + Na]^+$ : 688.1339, 690.1324; Found: 688.1337, 690.1324.

**Optical Rotation:**  $[\alpha]_D^{25}$  48 ( $c = 1.0$ ,  $CHCl_3$ ). 80% *ee* (HPLC conditions: Chiralpak IE column, *n*-Hexane/*i*-PrOH = 80:20, flow rate = 1.0 mL/min, wavelength = 254 nm,  $t_R = 16.202$  min for minor isomer,  $t_R = 19.509$  min for major isomer).

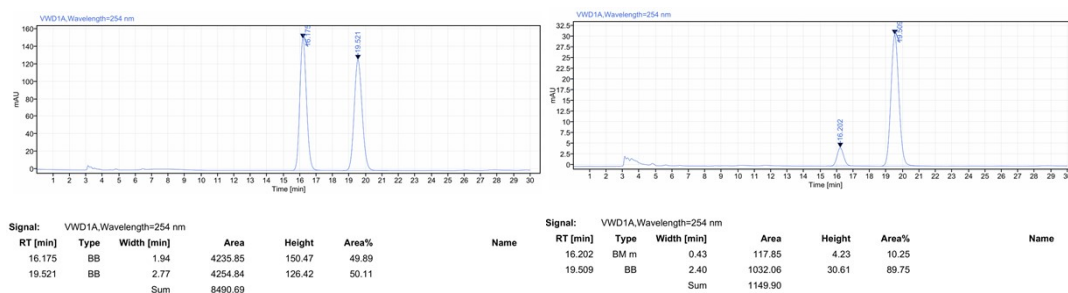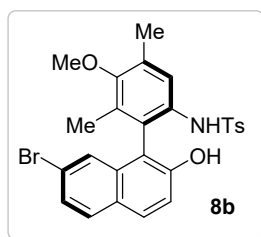

**8b.** (32% yield, Hexane-EtOAc = 3:1,  $R_f = 0.3$ ). Syrup.  **$^1H$  NMR** (400 MHz,  $CDCl_3$ )  $\delta$  7.82 (d,  $J = 8.9$  Hz, 1H), 7.68 (d,  $J = 8.7$  Hz, 1H), 7.49 (s, 1H), 7.41 (dd,  $J = 8.7, 1.9$  Hz, 1H), 7.35 (d,  $J = 8.3$  Hz, 2H), 7.23 (d,  $J = 8.9$  Hz, 1H), 7.09 (d,  $J = 8.1$  Hz, 2H), 6.87 (d,  $J = 1.6$  Hz, 1H), 6.07 (s, 1H), 4.98 (s, 1H), 3.72 (s, 3H), 2.38 (s, 3H), 2.36 (s, 3H), 1.74 (s, 3H).  **$^{13}C$  NMR** (100 MHz,  $CDCl_3$ )  $\delta$  154.7, 151.8, 143.9, 135.8, 133.8, 133.3, 132.6, 131.7, 130.9, 130.0, 129.6, 127.6, 127.3, 127.0, 125.4, 125.4, 122.0, 122.0, 121.3, 118.1, 113.3, 60.1, 21.7, 16.6, 13.3. **HRMS (ESI)**  $m/z$  Calcd for  $[C_{26}H_{24}BrNO_4S, M + Na]^+$ : 548.0502, 550.0484; Found: 548.0504, 550.0479.

**Optical Rotation:**  $[\alpha]_D^{25}$  -53 ( $c = 1.0$ ,  $CHCl_3$ ). 93% *ee* (HPLC conditions: Chiralpak IE column, *n*-Hexane/*i*-PrOH = 80:20, flow rate = 1.0 mL/min, wavelength = 254 nm,  $t_R = 5.336$  min for minor isomer,  $t_R = 8.541$  min for major isomer).

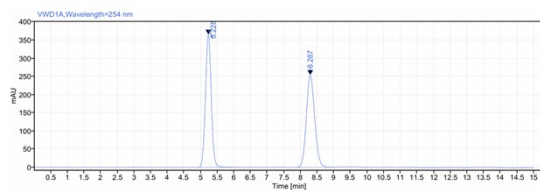

| RT [min] | Type | Width [min] | Area    | Height | Area% | Name |
|----------|------|-------------|---------|--------|-------|------|
| 5.228    | BB   | 2.02        | 4445.66 | 365.70 | 50.26 |      |
| 8.287    | BB   | 1.15        | 4399.59 | 253.75 | 49.74 |      |
|          | Sum  |             | 8845.26 |        |       |      |

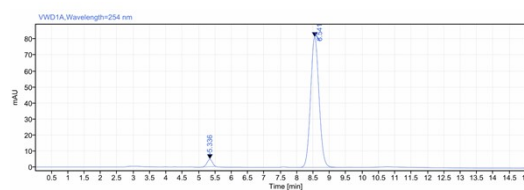

| RT [min] | Type | Width [min] | Area    | Height | Area% | Name |
|----------|------|-------------|---------|--------|-------|------|
| 5.336    | MM m | 0.18        | 52.63   | 4.65   | 3.44  |      |
| 8.541    | BB   | 1.33        | 1475.86 | 81.55  | 96.56 |      |
|          | Sum  |             | 1528.49 |        |       |      |

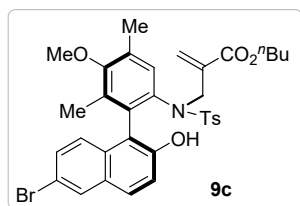

**9c.** (56% yield, Hexane-EtOAc = 4:1,  $R_f = 0.5$ ). Syrup.  $^1\text{H}$  NMR (400 MHz, DMSO- $d_6$ )  $\delta$  9.67 (br, 1H), 8.08 (d,  $J = 1.8$  Hz, 1H), 7.81 (d,  $J = 8.9$  Hz, 1H), 7.33 (d,  $J = 8.7$  Hz, 1H), 7.26 (d,  $J = 8.9$  Hz, 1H), 7.24 – 6.89 (m, 5H), 6.87 (s, 1H), 5.88 (s, 1H), 5.21 (s, 1H), 4.12 (s, 1H), 3.95 (t,  $J = 6.4$  Hz, 2H), 3.84 (d,  $J = 16.6$  Hz, 1H), 3.70 (s, 3H), 2.31 (s, 3H), 2.26 (s, 3H), 1.69 (s, 3H), 1.54 – 1.42 (m, 2H), 1.31 – 1.22 (m, 2H), 0.86 (t,  $J = 7.4$  Hz, 3H).  $^{13}\text{C}$  NMR (100 MHz, DMSO- $d_6$ )  $\delta$  165.5, 156.2, 152.4, 143.3, 136.0, 135.3, 134.9, 134.9, 132.0, 131.9, 130.6, 129.8, 129.3, 129.1, 128.7, 128.4, 128.0, 128.0, 127.7, 127.1, 119.3, 117.4, 115.5, 64.1, 59.6, 50.3, 30.0, 21.0, 18.6, 15.8, 13.6, 13.0. HRMS (ESI)  $m/z$  Calcd for  $[\text{C}_{34}\text{H}_{36}\text{BrNO}_6\text{S}, \text{M} + \text{Na}]^+$ : 688.1339, 690.1324; Found: 688.1338, 690.1321.

**Optical Rotation:**  $[\alpha]^{25}_D$  68 ( $c = 1.0$ ,  $\text{CHCl}_3$ ). 77% *ee* (HPLC conditions: Chiralpak IE column, *n*-Hexane/*i*-PrOH = 80:20, flow rate = 1.0 mL/min, wavelength = 254 nm,  $t_R = 13.233$  min for minor isomer,  $t_R = 16.617$  min for major isomer).

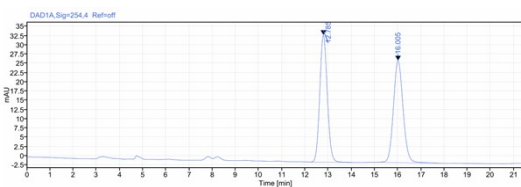

| RT [min] | Type | Width [min] | Area    | Height | Area% | Name |
|----------|------|-------------|---------|--------|-------|------|
| 12.785   | BB   | 1.91        | 775.64  | 34.41  | 49.41 |      |
| 16.005   | BB   | 2.95        | 794.31  | 27.59  | 50.59 |      |
|          | Sum  |             | 1569.95 |        |       |      |

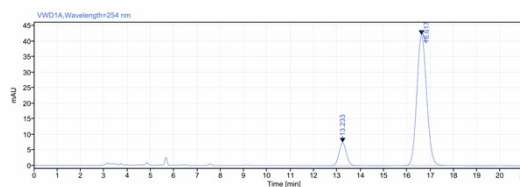

| RT [min] | Type | Width [min] | Area    | Height | Area% | Name |
|----------|------|-------------|---------|--------|-------|------|
| 13.233   | BB   | 1.32        | 161.33  | 7.35   | 11.59 |      |
| 16.617   | BB   | 2.13        | 1230.36 | 41.97  | 88.41 |      |
|          | Sum  |             | 1391.69 |        |       |      |

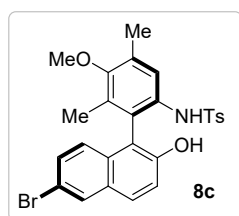

**8c.** (32% yield, Hexane-EtOAc = 3:1,  $R_f = 0.3$ ). Syrup.  $^1\text{H}$  NMR (400 MHz,  $\text{CDCl}_3$ )  $\delta$  7.95 (d,  $J = 1.8$  Hz, 1H), 7.75 (d,  $J = 8.9$  Hz, 1H), 55/150

Hz, 1H), 7.54 (s, 1H), 7.32 (d,  $J = 8.2$  Hz, 2H), 7.23 (d,  $J = 8.9$  Hz, 1H), 7.13 (dd,  $J = 8.9, 1.8$  Hz, 1H), 7.05 (d,  $J = 8.2$  Hz, 2H), 6.52 (d,  $J = 8.9$  Hz, 1H), 6.02 (s, 1H), 4.96 (s, 1H), 3.72 (s, 3H), 2.39 (s, 3H), 2.38 (s, 3H), 1.72 (s, 3H).  $^{13}\text{C}$  NMR (100 MHz,  $\text{CDCl}_3$ )  $\delta$  154.7, 151.2, 144.0, 136.0, 133.2, 132.6, 131.7, 131.0, 130.5, 130.2, 129.9, 129.5, 127.0, 125.0, 122.4, 121.5, 118.8, 117.5, 114.2, 60.1, 21.6, 16.6, 13.2. **HRMS (ESI)**  $m/z$  Calcd for  $[\text{C}_{26}\text{H}_{24}\text{BrNO}_4\text{S}, \text{M} + \text{Na}]^+$ : 548.0502, 550.0484; Found: 548.0505, 550.0489.

**Optical Rotation:**  $[\alpha]_{\text{D}}^{25} -82$  ( $c = 1.0$ ,  $\text{CHCl}_3$ ). 94% *ee* (HPLC conditions: Chiralpak IE column, *n*-Hexane/*i*-PrOH = 80:20, flow rate = 1.0 mL/min, wavelength = 254 nm,  $t_{\text{R}} = 10.652$  min for minor isomer,  $t_{\text{R}} = 8.992$  min for major isomer).

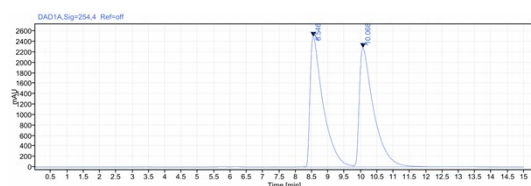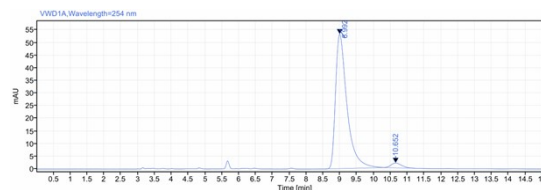

Signal: DAD1A, Sig=254.4, Ref=off

| RT [min] | Type | Width [min] | Area      | Height  | Area% | Name |
|----------|------|-------------|-----------|---------|-------|------|
| 8.546    | VV   | 1.53        | 69515.78  | 2493.05 | 49.87 |      |
| 10.068   | VB   | 2.67        | 69867.29  | 2277.23 | 50.13 |      |
| Sum      |      |             | 139383.06 |         |       |      |

Signal: VWD1A, Wavelength=254 nm

| RT [min] | Type | Width [min] | Area    | Height | Area% | Name |
|----------|------|-------------|---------|--------|-------|------|
| 8.992    | BB   | 1.72        | 1251.84 | 53.19  | 96.88 |      |
| 10.652   | BM m | 0.33        | 40.28   | 1.88   | 3.12  |      |
| Sum      |      |             | 1292.12 |        |       |      |

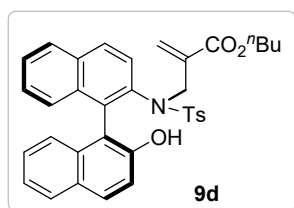

**9d.** (43% yield, Hexane-EtOAc = 5:1,  $R_f = 0.5$ ). Syrup.  $^1\text{H}$  NMR (400 MHz,  $\text{DMSO-d}_6$ )  $\delta$  9.64 (s, 1H), 8.02 (d,  $J = 8.6$  Hz, 2H), 7.96 – 7.85 (m, 2H), 7.52 (t,  $J = 7.5$  Hz, 1H), 7.43 (d,  $J = 8.8$  Hz, 1H), 7.34 – 7.24 (m, 3H), 7.23 – 7.05 (m, 5H), 7.04 (d,  $J = 8.5$  Hz, 1H), 6.91 (d,  $J = 8.2$  Hz, 1H), 5.87 (s, 1H), 5.21 (s, 1H), 4.21 (d,  $J = 16.6$  Hz, 1H), 3.96 (t,  $J = 5.3$  Hz, 2H), 3.88 (d,  $J = 16.6$  Hz, 1H), 2.30 (s, 3H), 1.51 – 1.40 (m, 2H), 1.28 – 1.19 (m, 2H), 0.83 (t,  $J = 7.4$  Hz, 3H).  $^{13}\text{C}$  NMR (100 MHz,  $\text{DMSO-d}_6$ )  $\delta$  165.4, 152.7, 143.5, 137.3, 135.9, 135.0, 134.0, 133.9, 133.5, 132.4, 129.7, 129.2, 128.6, 128.1, 127.9, 127.8, 127.7, 126.5, 126.5, 126.2, 126.0, 125.0, 122.7, 118.1, 115.5, 64.1, 49.7, 40.1, 38.9, 30.0, 20.9, 18.6, 13.6. **HRMS (ESI)**  $m/z$  Calcd for  $[\text{C}_{35}\text{H}_{33}\text{NO}_5\text{S}, \text{M} + \text{Na}]^+$ : 602.1972; Found: 602.1969.

**Optical Rotation:**  $[\alpha]^{25}_D$  70 ( $c = 1.0$ ,  $\text{CHCl}_3$ ). 71% *ee* (HPLC conditions: Chiralpak AD-H column, *n*-Hexane/*i*-PrOH = 70:30, flow rate = 1.0 mL/min, wavelength = 254 nm,  $t_R = 10.883$  min for minor isomer,  $t_R = 15.683$  min for major isomer).

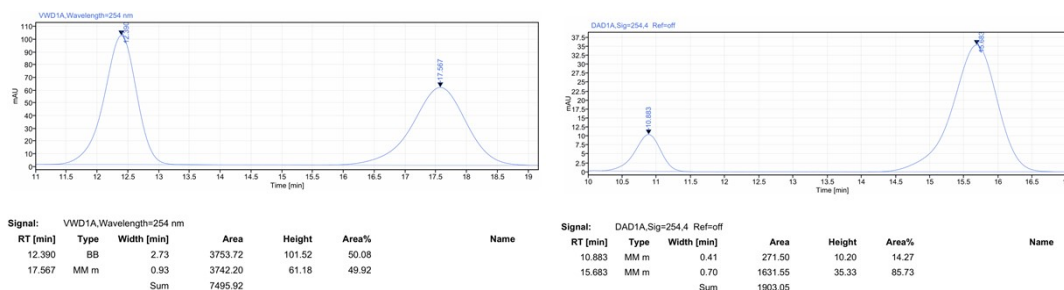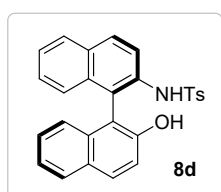

**8d.** (51% yield, Hexane-EtOAc = 4:1,  $R_f = 0.5$ ). Syrup.  $^1\text{H}$  NMR (400 MHz,  $\text{CDCl}_3$ )  $\delta$  8.13 (d,  $J = 9.0$  Hz, 1H), 8.04 – 7.93 (m, 2H), 7.88 (d,  $J = 8.2$  Hz, 2H), 7.46 (d,  $J = 8.2$  Hz, 2H), 7.41 (t,  $J = 7.5$  Hz, 1H), 7.35 (t,  $J = 7.5$  Hz, 1H), 7.30 (d,  $J = 8.9$  Hz, 1H), 7.25 (t,  $J = 7.5$  Hz, 1H), 7.12 – 7.07 (m, 3H), 7.04 (d,  $J = 8.5$  Hz, 1H), 6.64 (d,  $J = 8.5$  Hz, 1H), 6.51 (s, 1H), 4.69 (s, 1H), 2.34 (s, 3H).  $^{13}\text{C}$  NMR (100 MHz,  $\text{CDCl}_3$ )  $\delta$  151.8, 144.0, 135.8, 134.5, 132.9, 132.9, 131.5, 131.1, 130.5, 129.6, 129.2, 128.4, 128.2, 127.5, 127.4, 127.1, 125.6, 125.2, 123.9, 123.7, 119.1, 118.4, 117.8, 111.9, 21.48. **HRMS (ESI)**  $m/z$  Calcd for  $[\text{C}_{27}\text{H}_{21}\text{NO}_3\text{S}, \text{M}+\text{Na}]^+$ : 462.1134; Found: 462.1135.

**Optical Rotation:**  $[\alpha]^{25}_D$  -47 ( $c = 1.0$ ,  $\text{CHCl}_3$ ). 79% *ee* (HPLC conditions: Chiralpak AD-H column, *n*-Hexane/*i*-PrOH = 70:30, flow rate = 1.0 mL/min, wavelength = 254 nm,  $t_R = 9.539$  min for minor isomer,  $t_R = 8.684$  min for major isomer).

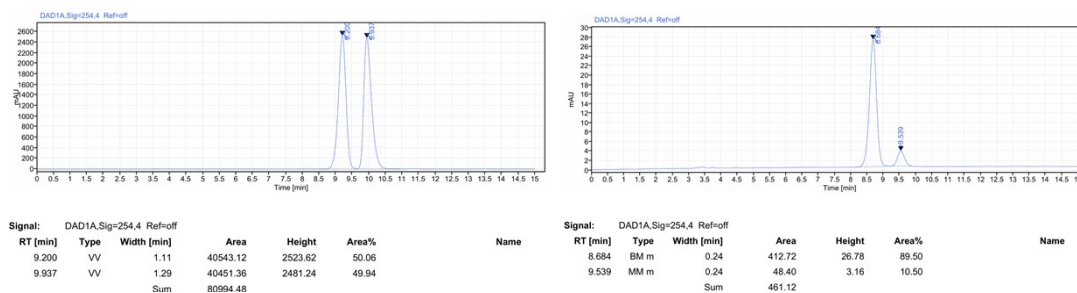

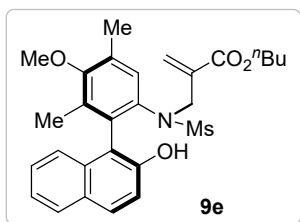

**9e.** (60% yield, Hexane-EtOAc = 3:1,  $R_f = 0.6$ ). Syrup.

$^1\text{H NMR}$  (400 MHz, DMSO)  $\delta$  9.55 (s, 1H), 7.81 – 7.71 (m, 2H), 7.25 – 7.13 (m, 3H), 7.06 (s, 1H), 6.97 (d,  $J = 13.3$  Hz, 1H), 6.03 (s, 1H), 5.56 (s, 1H), 4.18 – 3.75 (m, 4H), 3.61 (s, 3H), 2.54 – 2.29 (m, 3H), 2.25 (s, 3H), 1.61

(s, 3H), 1.49 – 1.36 (m, 2H), 1.26 – 1.17 (m, 2H), 0.80 (t,  $J = 7.4$  Hz, 3H).  $^{13}\text{C NMR}$  (100 MHz, DMSO- $d_6$ )  $\delta$  165.6, 156.1, 151.9, 135.7, 135.2, 135.1, 133.3, 131.8, 131.7, 129.7, 129.4, 127.9, 127.7, 126.1, 124.2, 124.2, 122.7, 118.3, 117.1, 64.1, 59.5, 49.6, 39.9, 30.0, 18.6, 15.9, 13.6, 13.0. **HRMS (ESI)**  $m/z$  Calcd for  $[\text{C}_{28}\text{H}_{33}\text{NO}_6\text{S}, \text{M} + \text{Na}]^+$ : 534.1921; Found: 534.1921.

**Optical Rotation:**  $[\alpha]^{25}_{\text{D}}$  26.0 ( $c = 1.0$ ,  $\text{CHCl}_3$ ). 54% *ee* (HPLC conditions: Chiralpak AD-H column, *n*-Hexane/*i*-PrOH = 90:10, flow rate = 1.0 mL/min, wavelength = 254 nm,  $t_R = 10.389$  min for minor isomer,  $t_R = 9.564$  min for major isomer).

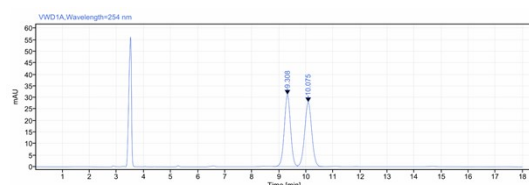

| RT [min] | Type | Width [min] | Area    | Height | Area% | Name |
|----------|------|-------------|---------|--------|-------|------|
| 9.308    | BV   | 0.88        | 500.94  | 31.03  | 49.84 |      |
| 10.075   | VB   | 1.00        | 508.24  | 27.79  | 50.36 |      |
| Sum      |      |             | 1009.19 |        |       |      |

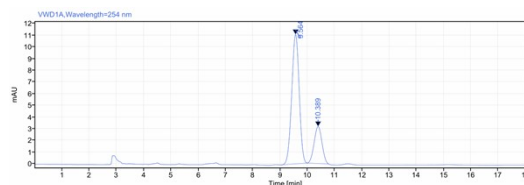

| RT [min] | Type | Width [min] | Area   | Height | Area% | Name |
|----------|------|-------------|--------|--------|-------|------|
| 9.564    | BB   | 0.96        | 211.26 | 11.07  | 76.99 |      |
| 10.389   | BM m | 0.31        | 63.16  | 3.16   | 23.01 |      |
| Sum      |      |             | 274.42 |        |       |      |

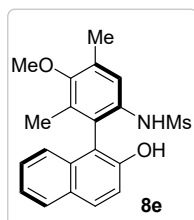

**8e.** (26% yield, Hexane-EtOAc = 5:1,  $R_f = 0.2$ ). Syrup.  $^1\text{H NMR}$

(400 MHz,  $\text{CDCl}_3$ )  $\delta$  7.87 – 7.83 (m, 2H), 7.48 (s, 1H), 7.40 – 7.31 (m, 2H), 7.24 (s, 1H), 7.13 – 7.04 (m, 1H), 5.77 (s, 1H), 5.22 (s, 1H), 3.75 (s, 3H), 2.69 (s, 3H), 2.40 (s, 3H), 1.86 (s, 3H).  $^{13}\text{C NMR}$  (100

MHz,  $\text{CDCl}_3$ )  $\delta$  155.0, 151.0, 133.23, 133.0, 132.4, 132.0, 131.1, 129.4, 128.7, 127.6, 124.2, 123.6, 123.1, 121.5, 117.7, 114.1, 60.1, 39.6, 16.5, 13.3.

**HRMS (ESI)**  $m/z$  Calcd for  $[\text{C}_{20}\text{H}_{21}\text{NO}_4\text{S}, \text{M} + \text{Na}]^+$ : 394.1083; Found: 394.1086.

**Optical Rotation:**  $[\alpha]_D^{25}$  -30.0 ( $c = 1.0$ ,  $\text{CHCl}_3$ ). 94% *ee* (HPLC conditions: Chiralpak AD-H column, *n*-Hexane/*i*-PrOH = 90:10, flow rate = 1.0 mL/min, wavelength = 254 nm,  $t_R = 9.005$  min for minor isomer,  $t_R = 11.326$  min for major isomer).

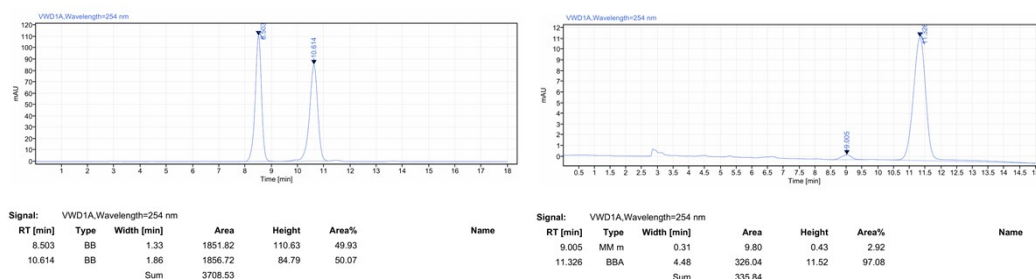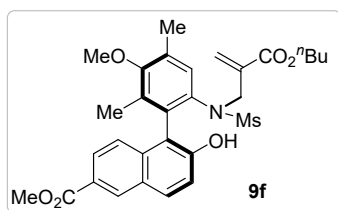

**9f.** (60% yield, Hexane-EtOAc = 5:1,  $R_f = 0.4$ ) Syrup.

**$^1\text{H}$  NMR** (400 MHz,  $\text{DMSO-d}_6$ )  $\delta$  10.11 (s, 1H), 8.55 (d,  $J = 1.4$  Hz, 1H), 8.07 (d,  $J = 8.9$  Hz, 1H), 7.70 (dd,  $J = 8.9, 1.6$  Hz, 1H), 7.37 (d,  $J = 8.9$  Hz, 1H), 7.15 (s, 1H),

7.09 (d,  $J = 7.0$  Hz, 1H), 6.02 (s, 1H), 5.57 (s, 1H), 4.14 – 3.98 (m, 4H), 3.87 (s, 3H), 3.70 (s, 3H), 2.50 (s, 3H), 2.32 (s, 3H), 1.68 (s, 3H), 1.51 – 1.40 (m, 2H), 1.29 – 1.23 (m, 2H), 0.86 (t,  $J = 7.3$  Hz, 3H).  **$^{13}\text{C}$  NMR** (100 MHz,  $\text{DMSO-d}_6$ )  $\delta$  166.5, 165.5, 156.1, 154.4, 135.8, 135.5, 135.3, 134.5, 131.7, 131.5, 131.2, 130.8, 130.1, 127.9, 127.8, 126.8, 125.0, 123.7, 119.3, 117.4, 64.1, 59.6, 52.0, 49.8, 39.7, 30.0, 18.6, 15.9, 13.5, 13.0. **HRMS (ESI)**  $m/z$  Calcd for  $[\text{C}_{30}\text{H}_{35}\text{NO}_8\text{S}, \text{M} + \text{Na}]^+$ : 592.1976; Found: 592.1978.

**Optical Rotation:**  $[\alpha]_D^{25}$  10.3 ( $c = 1.0$ ,  $\text{CHCl}_3$ ). 53% *ee* (HPLC conditions: Chiralpak IE column, *n*-Hexane/*i*-PrOH = 80:20, flow rate = 1.0 mL/min, wavelength = 254 nm,  $t_R = 18.985$  min for minor isomer,  $t_R = 22.803$  min for major isomer).

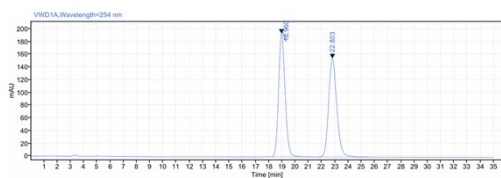

| Signal: VWD1A,Wavelength=254 nm |      |             |          |        |       |
|---------------------------------|------|-------------|----------|--------|-------|
| RT [min]                        | Type | Width [min] | Area     | Height | Area% |
| 18.960                          | BB   | 3.11        | 6601.10  | 193.16 | 49.89 |
| 22.803                          | BB   | 5.23        | 6630.70  | 154.34 | 50.11 |
| Sum                             |      |             | 13231.81 |        |       |

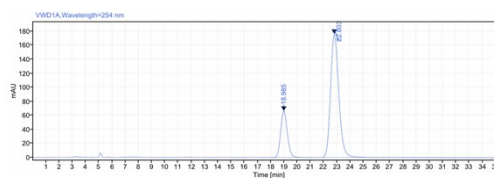

| Signal: VWD1A,Wavelength=254 nm |      |             |         |        |       |
|---------------------------------|------|-------------|---------|--------|-------|
| RT [min]                        | Type | Width [min] | Area    | Height | Area% |
| 18.985                          | BB   | 2.95        | 2312.45 | 66.28  | 23.27 |
| 22.803                          | BB   | 5.15        | 7625.97 | 176.17 | 76.73 |
| Sum                             |      |             | 9938.42 |        |       |

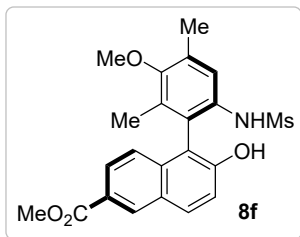

**8f.** (33% yield, Hexane-EtOAc = 2:1,  $R_f = 0.4$ ) Syrup.  $^1\text{H}$  NMR (400 MHz,  $\text{CDCl}_3$ )  $\delta$  8.61 (d,  $J = 1.5$  Hz, 1H), 8.00 (d,  $J = 8.8$  Hz, 1H), 7.94 (dd,  $J = 8.8, 1.5$  Hz, 1H), 7.49 (s, 1H), 7.35 (d,  $J = 8.8$  Hz, 1H), 7.14 (d,  $J = 8.8$  Hz, 1H), 5.75 (s, 1H), 5.53 (brs, 1H), 3.96 (s, 3H), 3.77 (s, 3H), 2.74 (s, 3H), 2.42 (s, 3H), 1.86 (s, 3H).  $^{13}\text{C}$  NMR (100 MHz,  $\text{CDCl}_3$ )  $\delta$  167.0, 155.1, 153.2, 135.0, 133.7, 133.0, 132.6, 132.0, 131.8, 128.4, 127.1, 125.8, 123.4, 122.8, 121.5, 118.8, 114.4, 60.2, 52.3, 39.8, 16.6, 13.3. HRMS (ESI)  $m/z$  Calcd for  $[\text{C}_{22}\text{H}_{23}\text{NO}_6\text{S}, \text{M} + \text{Na}]^+$ : 452.1138; Found: 452.1139.

**Optical Rotation:**  $[\alpha]_D^{25}$  -36.0 ( $c = 1.0$ ,  $\text{CHCl}_3$ ). 97% *ee* (HPLC conditions: Chiralpak AD-H column, *n*-Hexane/*i*-PrOH = 80:20, flow rate = 1.0 mL/min, wavelength = 254 nm,  $t_R = 9.452$  min for minor isomer,  $t_R = 7.949$  min for major isomer).

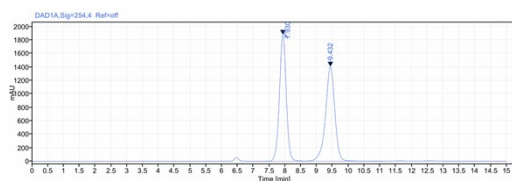

| Signal: DAD1A,Sig=254.4 Ref=off |      |             |          |         |       |
|---------------------------------|------|-------------|----------|---------|-------|
| RT [min]                        | Type | Width [min] | Area     | Height  | Area% |
| 7.930                           | BV   | 1.32        | 28396.09 | 1879.94 | 49.67 |
| 9.432                           | VB   | 2.45        | 28772.42 | 1405.30 | 50.33 |
| Sum                             |      |             | 57168.51 |         |       |

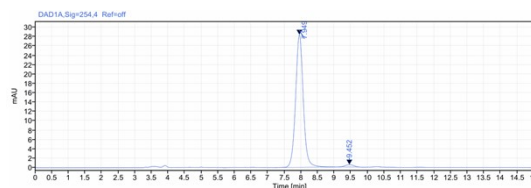

| Signal: DAD1A,Sig=254.4 Ref=off |      |             |        |        |       |
|---------------------------------|------|-------------|--------|--------|-------|
| RT [min]                        | Type | Width [min] | Area   | Height | Area% |
| 7.949                           | BB   | 1.80        | 457.04 | 28.34  | 98.25 |
| 9.452                           | MM m | 0.24        | 8.12   | 0.47   | 1.75  |
| Sum                             |      |             | 465.16 |        |       |



#### IV. Racemization experiment

$$\Delta G^\ddagger = RT \ln \left( \frac{K_B \cdot T}{h K_{\text{enantiomerization}}} \right) K_{\text{enantiomerization}} = \frac{1}{2} K_{\text{rac}}$$

$K_B$  is the Boltzmann,  $K_B = 1.38066E - 23$  J·K<sup>-1</sup>. T is temperature.  $h$  is the Planck constant.  $h = 6.62608E-34$  Js.  $R$  is the specific gas constant,  $R = 8.31451$  J·K<sup>-1</sup>·mol<sup>-1</sup>

Compound (0.1 mmol) was dissolved in mesitylene (1 mL) in a Schlenk tube. The tube was immersed in a pre-heated oil bath at 100-140 °C. At given interval of time, small samples (50 μL) was removed via syringe and injected into the HPLC to measure the enantiomeric excess.

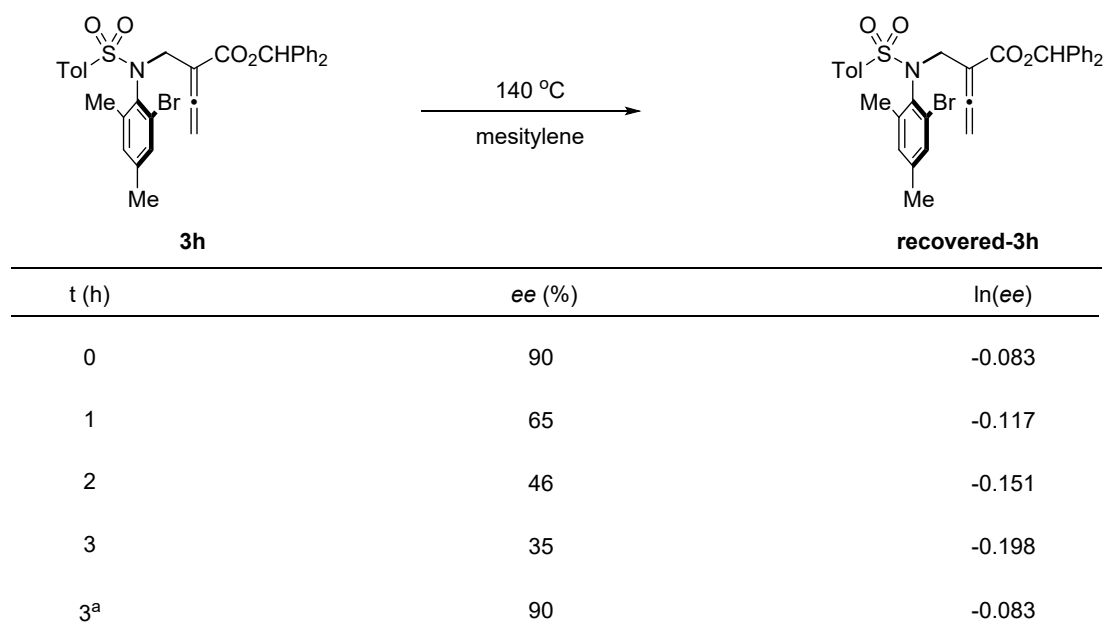

<sup>a</sup>T = 110 °C

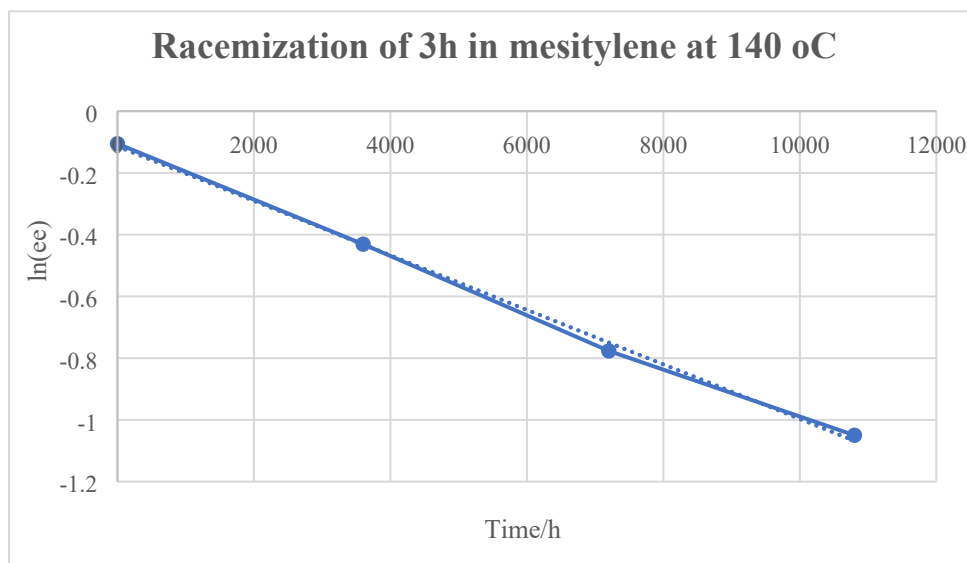

$$K_{\text{rac}} = 9\text{E-}5, K_{\text{enantiomerization}} = 4.5\text{E-}5, \Delta G^\ddagger = 32.65 \text{ Kcal/mol}$$

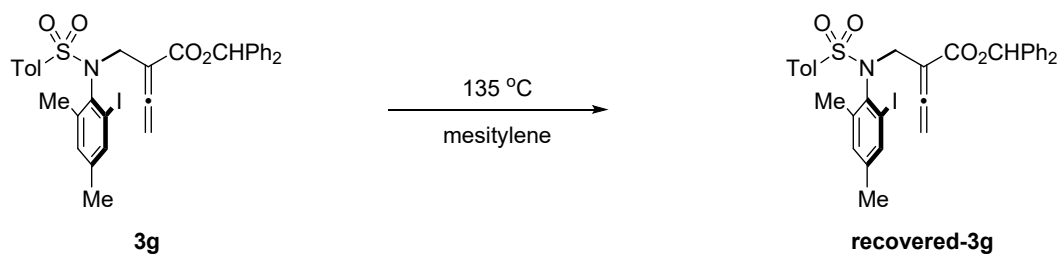

| t (h) | ee (%) | ln(ee) |
|-------|--------|--------|
| 0     | 92     | -0.083 |
| 1     | 89     | -0.117 |
| 2     | 86     | -0.151 |
| 3     | 82     | -0.198 |

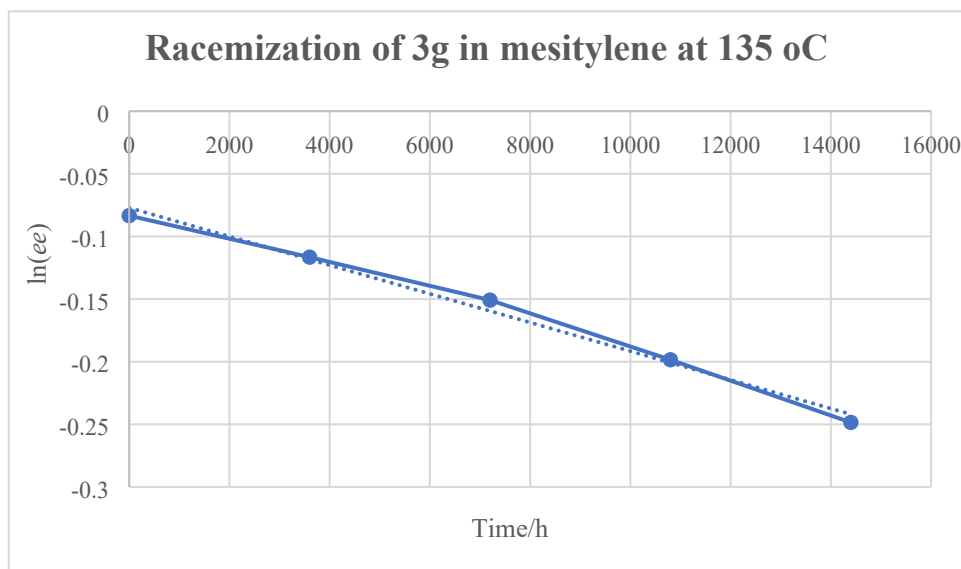

$$K_{\text{rac}} = 1\text{E-}5, K_{\text{enantiomerization}} = 5\text{E-}6, \Delta G^\ddagger = 34.02 \text{ Kcal/mol}$$

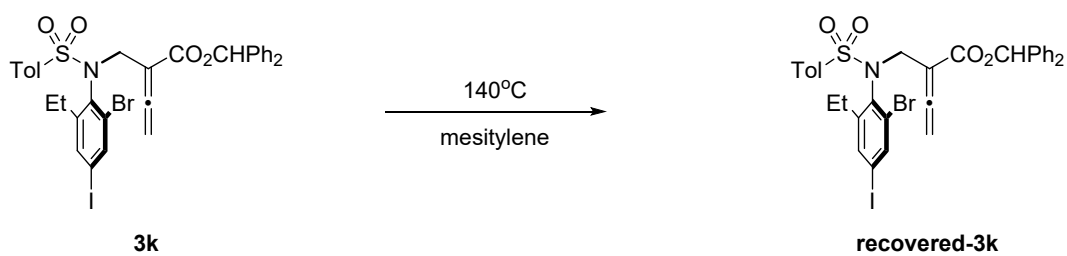

| t (h) | ee (%) | ln(ee) |
|-------|--------|--------|
| 0     | 75     | -0.288 |
| 1     | 71     | -0.342 |
| 2     | 67     | -0.400 |
| 3     | 62     | -0.478 |
| 4     | 66     | -0.562 |

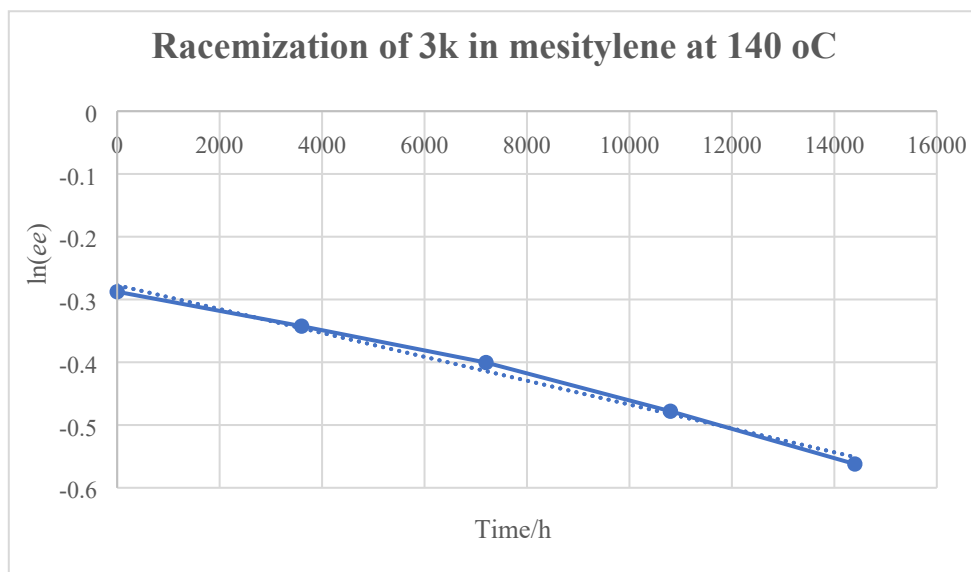

$$K_{\text{rac}} = 2\text{E-}5, K_{\text{enantiomerization}} = 1\text{E-}5, \Delta G^\ddagger = 33.88 \text{ Kcal/mol}$$

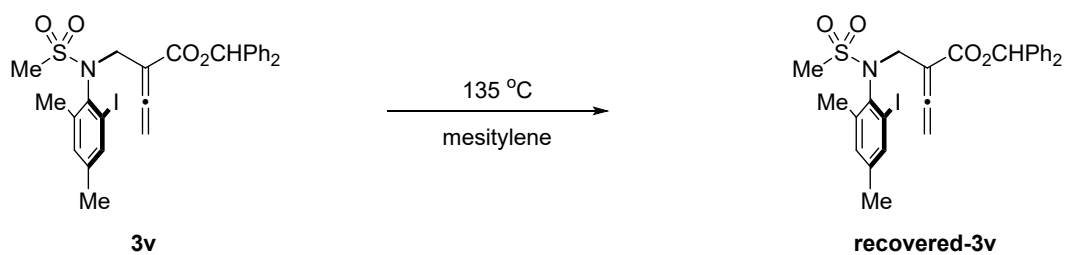

| t (h) | ee (%) | ln(ee) |
|-------|--------|--------|
| 0     | 97     | -0.030 |
| 0.5   | 92     | -0.083 |
| 1     | 87     | -0.139 |
| 1.5   | 83     | -0.186 |
| 2     | 79     | -0.236 |

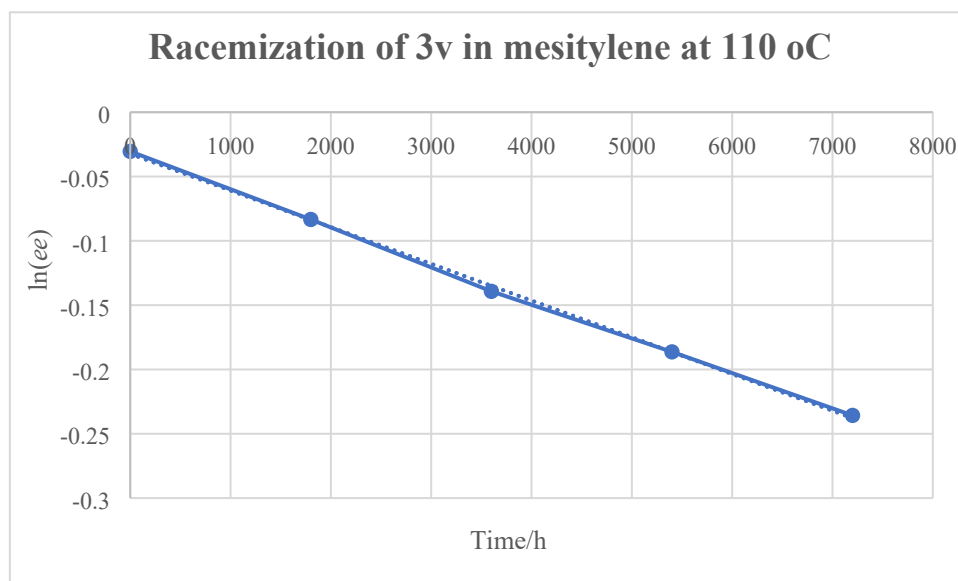

$$K_{\text{rac}} = 3\text{E-}5, K_{\text{enantiomerization}} = 1.5\text{E-}5, \Delta G^\ddagger = 33.13 \text{ Kcal/mol}$$

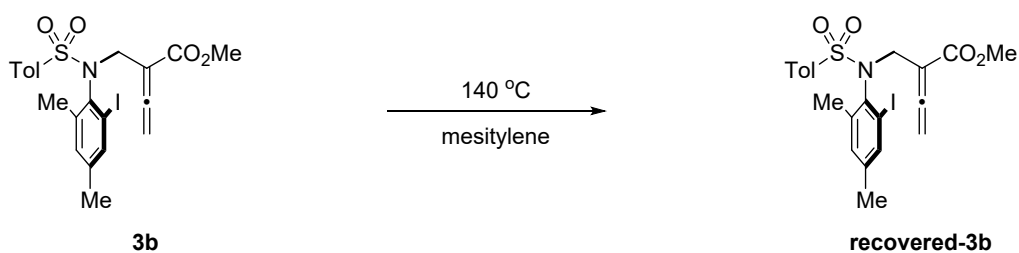

| t (h) | ee (%) | ln(ee) |
|-------|--------|--------|
| 0     | 85     | -0.163 |
| 1     | 68     | -0.400 |
| 2     | 45     | -0.799 |
| 3     | 32     | -1.139 |

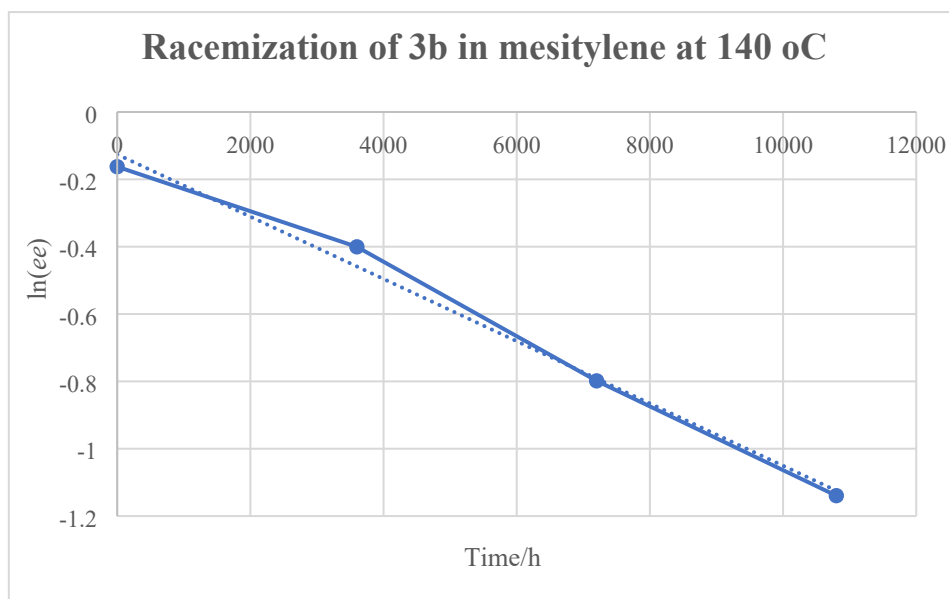

$$K_{\text{rac}} = 9\text{E-}5, K_{\text{enantiomerization}} = 4.5\text{E-}5, \Delta G^\ddagger = 32.65 \text{ Kcal/mol}$$

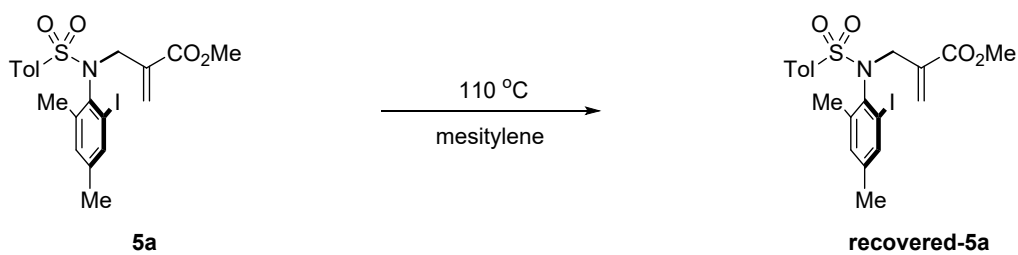

| t (h) | ee (%) | ln(ee) |
|-------|--------|--------|
| 0     | 90     | -0.105 |
| 0.5   | 86     | -0.151 |
| 1     | 83     | -0.186 |
| 1.5   | 78     | -0.248 |
| 2     | 74     | -0.301 |

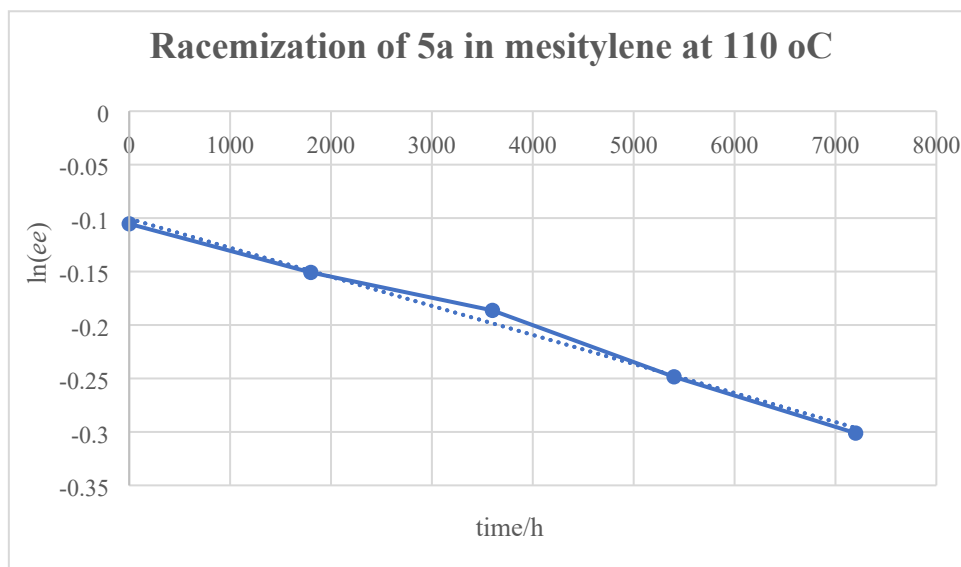

$$K_{\text{rac}} = 3\text{E-}5, K_{\text{enantiomerization}} = 1.5\text{E-}5, \Delta G^\ddagger = 31.05 \text{ Kcal/mol}$$

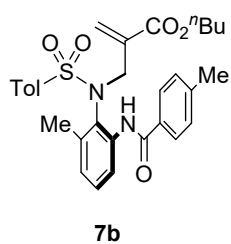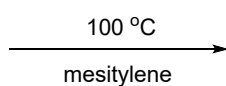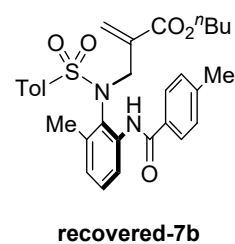

| t (h) | ee (%) | ln(ee) |
|-------|--------|--------|
| 0     | 78     | -0.248 |
| 0.5   | 70     | -0.357 |
| 1     | 64     | -0.446 |
| 1.5   | 59     | -0.528 |
| 2     | 50     | -0.693 |
| 2.5   | 46     | -0.777 |

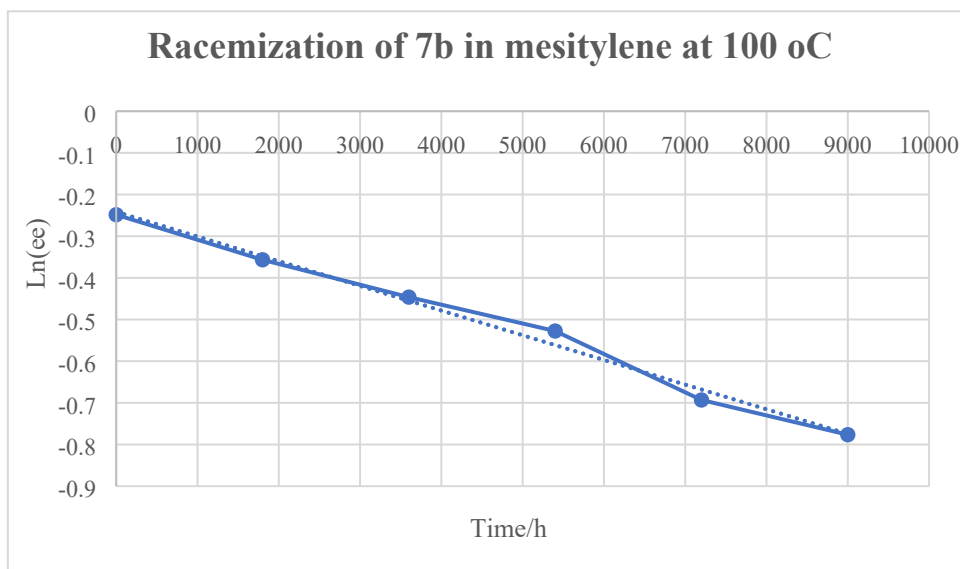

$$K_{\text{rac}} = 6\text{E-}5, K_{\text{enantiomerization}} = 3\text{E-}5, \Delta G^\ddagger = 29.83 \text{ Kcal/mol}$$

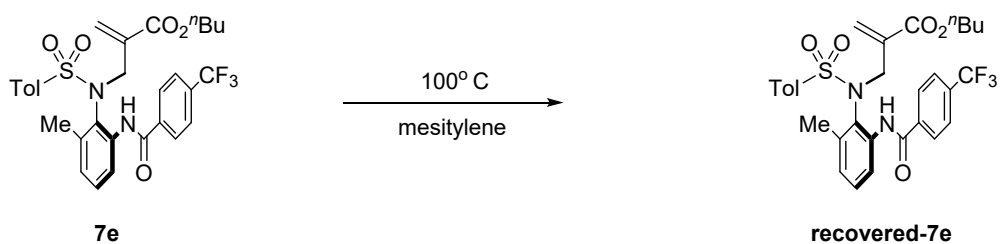

| t (h) | ee (%) | ln(ee) |
|-------|--------|--------|
| 0     | 77     | -0.261 |
| 0.5   | 70     | -0.357 |
| 1     | 63     | -0.462 |
| 1.5   | 58     | -0.545 |
| 2     | 53     | -0.635 |



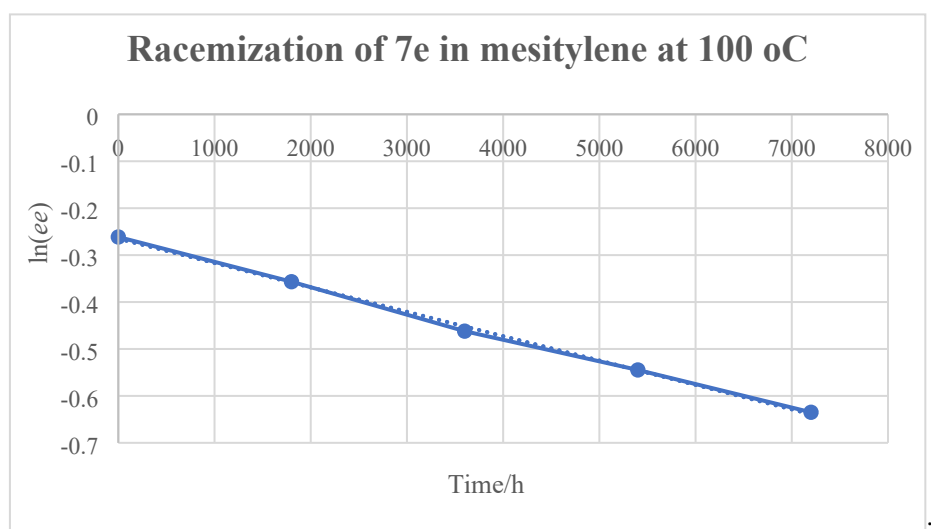

$$K_{\text{rac}} = 5\text{E-}5, K_{\text{enantiomerization}} = 2.5\text{E-}5, \Delta G^\ddagger = 29.85 \text{ Kcal/mol}$$

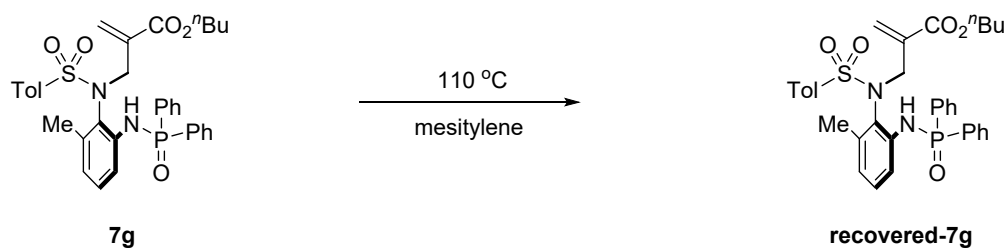

| t (h) | ee (%) | ln(ee) |
|-------|--------|--------|
| 0     | 66     | -0.416 |
| 0.5   | 64     | -0.446 |
| 1     | 62     | -0.478 |
| 1.5   | 60     | -0.511 |
| 2     | 57     | -0.534 |

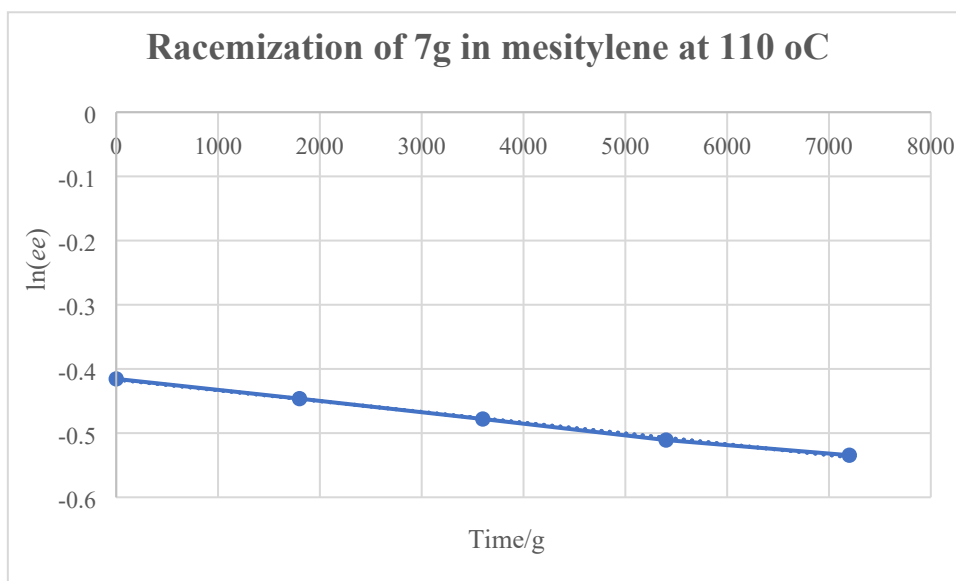

$$K_{\text{rac}} = 2\text{E-}5, K_{\text{enantiomerization}} = 1\text{E-}5, \Delta G^\ddagger = 31.36 \text{ Kcal/mol}$$

## V. Gram scale reaction

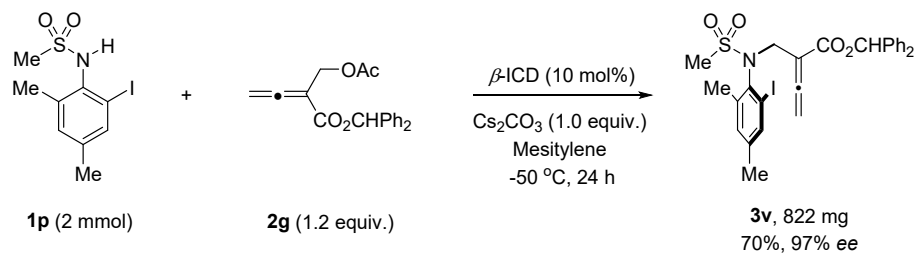

To a three-necked flask containing **1p** (650.3 mg, 2 mmol),  $\beta$ -ICD (60 mg, 0.2 mmol, 10 mol%) and  $\text{Cs}_2\text{CO}_3$  (651.6 mg, 2 mmol, 1.0 equiv.) were added mesitylene (120 mL) and dienoate **2g** (773.7 mg, 2.4 mmol, 1.2 equiv.). The reaction mixture was stirred at -50 °C for 24 hours. The solvent was removed by silica gel column chromatography and the residue was then purified by silica gel column chromatography (Hexane-EtOAc = 5:1) to afford the product **3v** (822 mg) in 70% yield with 97% *ee*.

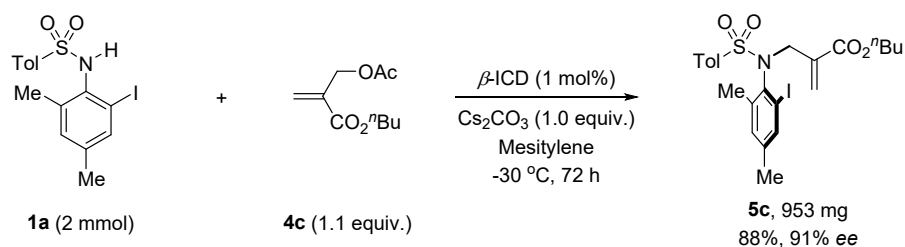

To a three-necked flask containing **1a** (802.5 mg, 2 mmol),  $\beta$ -ICD (6 mg, 0.02 mmol, 1 mol%) and  $\text{Cs}_2\text{CO}_3$  (651.6 mg, 2 mmol, 1.0 equiv.) were added mesitylene (20 mL) and MBH acetate **4c** (440.5 mg, 2.2 mmol, 1.1 equiv.). The reaction mixture was stirred at -30 °C for 72 hours. The solvent was removed by silica gel column chromatography and the residue was then purified by silica gel column chromatography (Hexane-EtOAc = 15:1) to afford the product **5c** (953 mg) in 88% yield with 91% *ee*.

## VI. Further transformation

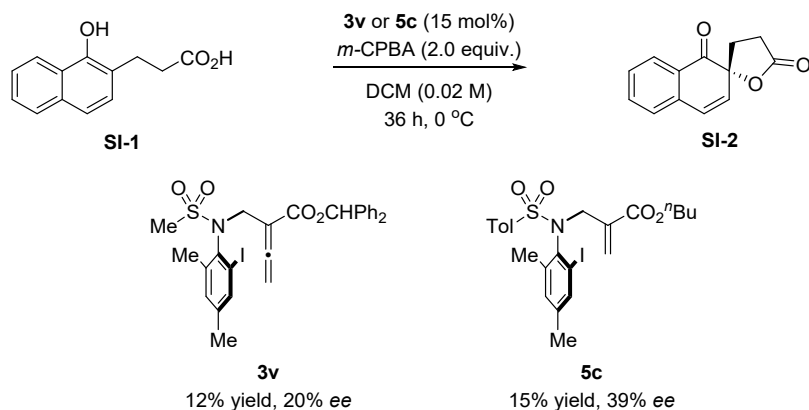

A solution of **3w** or **5c** (26.6 mg, 0.123 mmol, 15 mol%) and *m*-CPBA (85%, 37.3 mg, 0.218 mmol, 1.5 equiv.) in CH<sub>2</sub>Cl<sub>2</sub> was stirred at 0 °C for 5 min, then 3-(1-hydroxy-2-naphthyl)propionic acid **SI-1** was added. After 36 h, the resulting mixture poured into aqueous Na<sub>2</sub>S<sub>2</sub>O<sub>3</sub> (5 mL) and aqueous NaHCO<sub>3</sub>, and extracted with CH<sub>2</sub>Cl<sub>2</sub>. The organic layers were dried over anhydrous Na<sub>2</sub>SO<sub>4</sub> and solvents were removed in vacuo. The residue was purified by column chromatography on silica gel (eluent: Hexane-EtOAc-CH<sub>2</sub>Cl<sub>2</sub> = 8:1:1) to give **SI-2**. <sup>1</sup>H NMR (CDCl<sub>3</sub>, 400 MHz) δ 8.00 (d, *J* = 7.7 Hz, 1H), 7.62 (td, *J* = 7.5, 1.0 Hz, 1H), 7.40 (t, *J* = 7.5 Hz, 1H), 7.25 (d, *J* = 7.7 Hz, 1H), 6.65 (d, *J* = 9.9 Hz, 1H), 6.20 (d, *J* = 9.9 Hz, 1H), 2.90 (ddd, *J* = 9.7, 11.2, 17.6 Hz, 1H), 2.59 (ddd, *J* = 2.0, 9.6, 17.6 Hz, 1H), 2.41 (ddd, *J* = 2.0, 9.6, 13.2 Hz, 1H), 2.18 (ddd, *J* = 9.8, 11.2, 13.2 Hz, 1H); <sup>13</sup>C NMR (101 MHz, CDCl<sub>3</sub>) δ 196.5, 176.5, 136.8, 135.7, 132.3, 128.9, 127.9, 127.9, 127.7, 127.3, 83.4, 31.2, 26.5; **MS** (EI) *m/z* 214.06 (M<sup>+</sup>); HPLC condition: Chiralpak OD-H column, *n*-Hexane/*i*-PrOH = 85:15, flow rate = 1.0 mL/min, wavelength = 254 nm, *t*<sub>R</sub> = 17.6 min for minor isomer, *t*<sub>R</sub> = 21.1 min for major isomer).

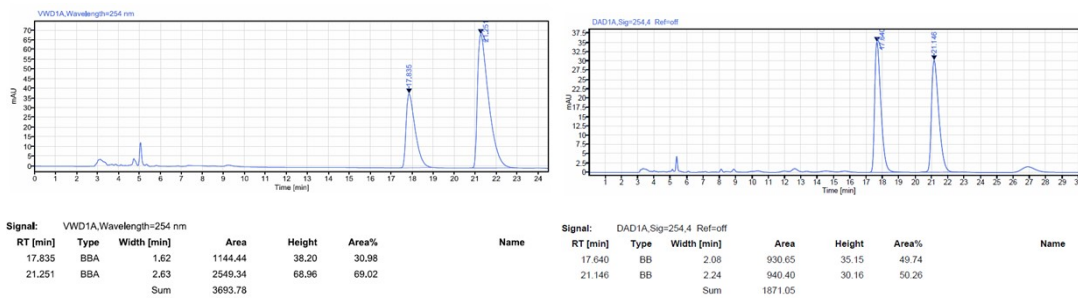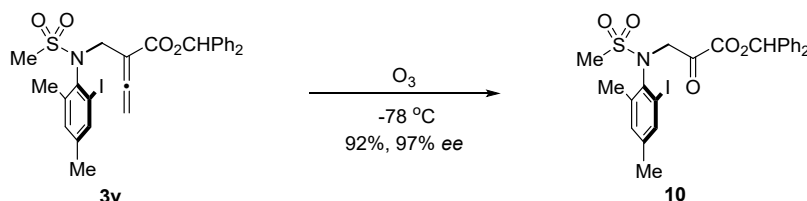

Through a solution containing **3v** (108 mg, 0.2 mmol) in 2 mL of  $\text{CH}_2\text{Cl}_2$  was bubbled an ozone-oxygen stream at  $-78\text{ }^\circ\text{C}$  until the starting material was consumed. The resulting mixture poured into aqueous  $\text{Na}_2\text{O}_3\text{S}_2$  (5 mL) and extracted with  $\text{CH}_2\text{Cl}_2$ . The organic layer is dried on anhydrous  $\text{Na}_2\text{SO}_4$  and the solvent is removed in vacuum to obtain the product **10**.  $^1\text{H}$  NMR (400 MHz,  $\text{CDCl}_3$ )  $\delta$  7.57 (s, 1H), 7.43 – 7.31 (m, 10H), 7.06 (s, 1H), 6.96 (s, 1H), 5.05 (d,  $J = 19.5$  Hz, 1H), 4.91 (d,  $J = 19.5$  Hz, 1H), 3.36 (s, 3H), 2.53 (s, 3H), 2.25 (s, 3H).  $^{13}\text{C}$  NMR (100 MHz,  $\text{CDCl}_3$ )  $\delta$  188.0, 159.1, 141.6, 141.0, 139.4, 139.3, 138.8, 133.1, 129.0, 128.8, 128.8, 127.6, 127.4, 101.2, 79.9, 58.9, 44.0, 20.6. HRMS (ESI)  $m/z$  Calcd for  $[\text{C}_{25}\text{H}_{24}\text{INO}_5\text{S}, \text{M} + \text{Na}]^+$ : 600.0310; Found: 600.0311.  $[\alpha]_D^{25}$   $-13.3$  ( $c = 1.0$ ,  $\text{CHCl}_3$ ). 97% *ee*. HPLC conditions: Chiralpak AD-H column, *n*-Hexane/*i*-PrOH = 70:30, flow rate = 1.0 mL/min, wavelength = 254 nm,  $t_R = 14.869$  min for minor isomer,  $t_R = 18.558$  min for major isomer).

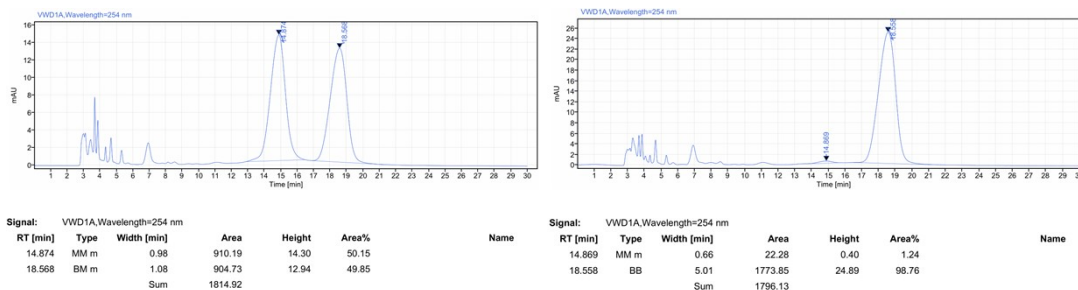

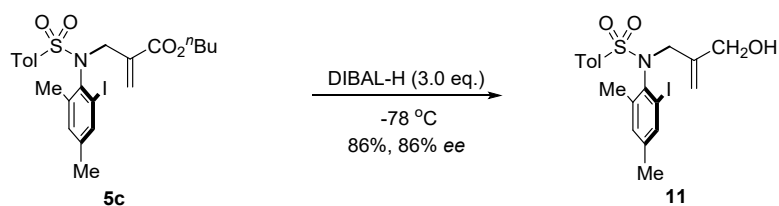

A solution of **5c** (108 mg, 0.2 mmol) and DIBAL-H (0.4 mL, 0.6 mmol, 3 equiv.) in  $\text{CH}_2\text{Cl}_2$  (0.6 mL) was stirred at  $-78\text{ }^\circ\text{C}$  for 8 h. the resulting mixture poured into aqueous  $\text{NH}_4\text{Cl}$  (5 mL) and extracted with  $\text{CH}_2\text{Cl}_2$ . The organic layers were dried over anhydrous  $\text{Na}_2\text{SO}_4$  and solvents were removed in vacuo. The residue was purified by column chromatography on silica gel (Hexane-EtOAc = 4:1) to give **11**.

$^1\text{H}$  NMR (400 MHz,  $\text{CDCl}_3$ )  $\delta$  7.69 (d,  $J = 8.2$  Hz, 2H), 7.51 (s, 1H), 7.28 (d,  $J = 8.1$  Hz, 2H), 7.01 (s, 1H), 5.06 (s, 1H), 4.67 (s, 1H), 4.43 (d,  $J = 14.0$  Hz, 1H), 4.29 (dd,  $J = 14.6, 2.7$  Hz, 2H), 4.16 (d,  $J = 14.6$  Hz, 1H), 2.50 (s, 1H), 2.42 (s, 3H), 2.23 (s, 6H).

$^{13}\text{C}$  NMR (100 MHz,  $\text{CDCl}_3$ )  $\delta$  143.7, 143.4, 142.2, 140.0, 139.3, 138.1, 136.9, 132.5, 129.6, 128.2, 117.6, 100.1, 64.3, 52.4, 21.5, 20.4, 20.3. HRMS (ESI)  $m/z$  Calcd for  $[\text{C}_{19}\text{H}_{22}\text{INO}_3\text{S}, \text{M} + \text{Na}]^+$ : 494.0257; Found: 494.0258.  $[\alpha]_D^{25}$   $-22.5$  ( $c = 1.0, \text{CHCl}_3$ ).

86% ee. HPLC conditions: Chiralpak AD-H column,  $n$ -Hexane/ $i$ -PrOH = 90:10, flow rate = 1.0 mL/min, wavelength = 254 nm,  $t_R = 16.564$  min for minor isomer,  $t_R = 19.170$  min for major isomer).

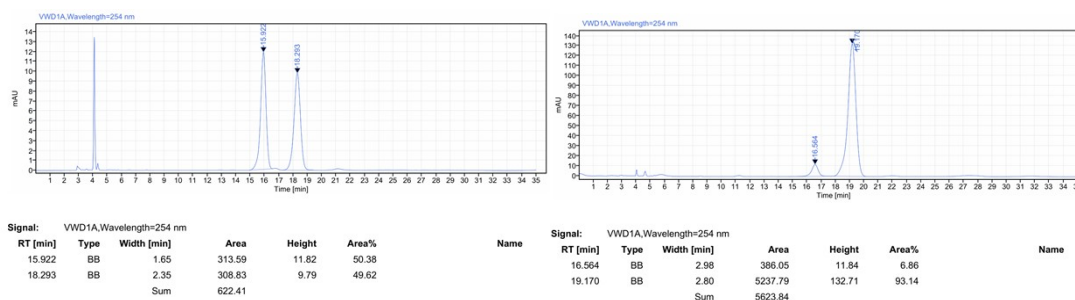

## VII. Geometries of the enantiomeric transition states

The atroposelective model are depicted as follows: the deprotonated **1g** binds to catalyst  $\beta$ -ICD by hydrogen-bonding interaction between the S=O oxygen of **1g** and the OH of  $\beta$ -ICD; subsequently, the product **3g** was readily afforded by nucleophilic attack under the chiral environment; the orientation of the electronic abundant iodine atom in the favored TS-3g-major shows more favorable noncovalent interactions with hydrogens; hence placing the *ortho*-iodine inside gives rise to the favored transition state TS-3g-major, while placing the *ortho*-methyl inside results in the less favored TS-3g-minor.

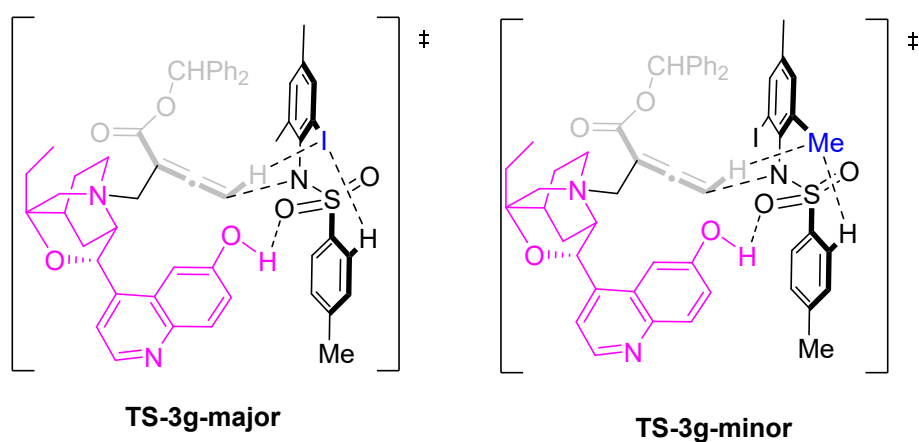

## VIII. References

- [1] (a) B. Jiang, M. Zhao, S.-S Li, Y.-H Xu and T.-P Loh, *Angew.Chem. Int.Ed.*, 2018, **57**,555 –559; (b) V. K. Aggarwal, D. K. Dean, A. Mereu and R. Williams, *J. Org. Chem.*, 2002, **67**, 510–514
- [2] (a) Q. Zhang, H. Jin, J. Feng, Y. Zhu, P. Jia, C. Wu and Y. Huang, *Org. Lett.*, 2019, **21**, 1407–1411; (b) D.T. Ziegler, L. Riesgo, T. Ikeda, Y. Fujiwara and C. Fu. *Angew. Chem. Int. Ed.*, 2014, **53**, 13183.
- [3] H. Gao, Q. Xu, C. Keene, M. Yousufuddin, D. D. Ess and L. Kürti. P, *Angew. Chem. Int. Ed.*, 2016, **128**,576 –581.
- [4] (a) Y. Luo, T. Tian, Y. Nishihara, L. Lv and Z. Li., *Chem. Commun.* 2021, **57**, 9276–9279. (b) J. Wang, F. Li, W. Yang, Y. Wu, D. Ma, F. Zhang and J. Wang, *Tetrahedron Letters.*, 2018, **59**, 1902–1905; (c) G. Regina, R. Bar, W. M. Rense, E. D. Cesare, A. Coluccia, F. Piscitelli, V. Famigliani, A. Reggio, M. Nalli, S. Pelliccia, E. D. Pozzo, B. Costa, I. Gtantna, A. Porta, B. Maresca, A. Soriani, M. L. Iannitto, A. Santoni, J. Li, M. M. Cona, F. Chen, Y. N, A. Brancale, G. Dondio, S. Vultaggio, M. Varasi, C. Mercurio, C. Martini. E. Hamel, P. Lavia, E. Novellino and R. Silvestri., *J. Med. Chem.*, 2013, **56**, 123–149.
- [5] (a) J. F. W. Keana, S. M. Kher, S. Cai, C. M. Dinsomore, A. G. Glenn, J. Guastella, J. Huang, V. Ilyin, Y. Lu, P. L. Mouser, R. M. Woodward and E. Weber. *J. Med. Chem.*, 1995, **38**, 4367–4379. (b) M. J. Fray, D. J. Bull, C. L. Carr, E. C. L. Gautier, C. E. Mowbray and A. Stobie, *J. Med. Chem.*, 2001, **44**, 1951–1962; (c) C. Deur, A. K. Agrawal, H. Baum, J. Booth, S. Bove, J. Brieland, A. Bunker, C. Connolly, J. Cornicelli, J. D. B. Finzel, X. Gan, S. Guppy, G. K. K. Kilgore, P. L. C. Loi, Z. Lou, M. Morris, L. P. S. Przybranowski, F. Riley, B. Samas, B. Sanchez, H. Tecle, Z. Wang, K. Welch, M. Wilson and K. Yates. *Bioorganic & Medicinal Chemistry Letters.*, 2007, **17**, 4599–4603



## IX. X-Ray crystallography analysis of compound 3v (CCDC-2078431)

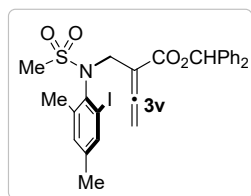

≡

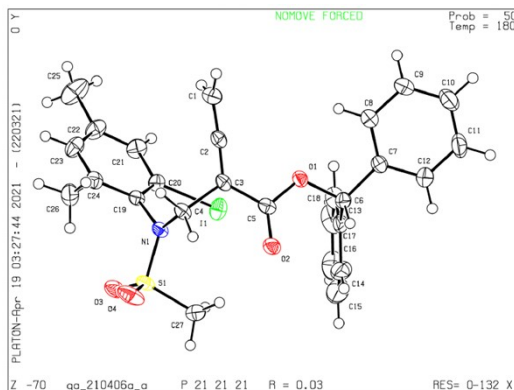

### Datablock: ga\_210406a\_a

|                        |                                            |                                  |                    |
|------------------------|--------------------------------------------|----------------------------------|--------------------|
| Bond precision:        | C-C = 0.0065 Å                             |                                  | Wavelength=1.34138 |
| Cell:                  | a=9.5319(7)                                | b=15.1834(11)                    | c=18.2181(14)      |
|                        | alpha=90                                   | beta=90                          | gamma=90           |
| Temperature:           | 180 K                                      |                                  |                    |
| Volume                 | Calculated                                 | Reported                         |                    |
| Space group            | P 21 21 21                                 | P 21 21 21                       |                    |
| Hall group             | P 2ac 2ab                                  | P 2ac 2ab                        |                    |
| Moiety formula         | C27 H26 I N O4 S                           | ?                                |                    |
| Sum formula            | C27 H26 I N O4 S                           | C27 H26 I N O4 S                 |                    |
| Mr                     | 587.45                                     | 587.45                           |                    |
| Dx, g cm <sup>-3</sup> | 1.480                                      | 1.480                            |                    |
| Z                      | 4                                          | 4                                |                    |
| Mu (mm <sup>-1</sup> ) | 7.205                                      | 7.205                            |                    |
| F000                   | 1184.0                                     | 1184.0                           |                    |
| F000'                  | 1187.51                                    |                                  |                    |
| h, k, lmax             | 11, 19, 22                                 | 11, 19, 22                       |                    |
| Nref                   | 5475 [ 3091]                               | 5459                             |                    |
| Tmin, Tmax             | 0.374, 0.487                               | 0.430, 0.752                     |                    |
| Tmin'                  | 0.178                                      |                                  |                    |
| Correction method-     | # Reported T Limits: Tmin=0.430 Tmax=0.752 |                                  |                    |
| AbsCorr                | = MULTI-SCAN                               |                                  |                    |
| Data completeness-     | 1.77/1.00                                  | Theta(max)= 57.467               |                    |
| R(reflections)-        | 0.0295 ( 5355)                             | wR2(reflections)- 0.0723 ( 5459) |                    |
| S                      | 1.055                                      | Npar= 318                        |                    |

The following ALERTS were generated. Each ALERT has the format  
**test-name ALERT alert-type alert-level.**  
 Click on the hyperlinks for more details of the test.

| Alert level C                                                                                                                                                                                                                                                                                                                                                                                                                                                                                                                                                                                                                                                                   |                                                                                    |       |                     |
|---------------------------------------------------------------------------------------------------------------------------------------------------------------------------------------------------------------------------------------------------------------------------------------------------------------------------------------------------------------------------------------------------------------------------------------------------------------------------------------------------------------------------------------------------------------------------------------------------------------------------------------------------------------------------------|------------------------------------------------------------------------------------|-------|---------------------|
| PLAT024 ALERT 2 C                                                                                                                                                                                                                                                                                                                                                                                                                                                                                                                                                                                                                                                               | Ratio of Maximum / Minimum Residual Density ...                                    | 2.94  | Report              |
| PLAT025 ALERT 2 C                                                                                                                                                                                                                                                                                                                                                                                                                                                                                                                                                                                                                                                               | U(isc) H1B Smaller than U(sq) C1 by                                                | 0.016 | Ang**2              |
| PLAT011 ALERT 1 C                                                                                                                                                                                                                                                                                                                                                                                                                                                                                                                                                                                                                                                               | Missing PCP Refl Between Thmin & Sth/Lc                                            | 0.600 | 2 Report            |
| PLAT007 ALERT 1 C                                                                                                                                                                                                                                                                                                                                                                                                                                                                                                                                                                                                                                                               | The Flack x is >> 0 - Do a BASF/TWIN Refinement                                    |       | Please Check        |
| Alert level C                                                                                                                                                                                                                                                                                                                                                                                                                                                                                                                                                                                                                                                                   |                                                                                    |       |                     |
| ADHM001 ALERT 1 C                                                                                                                                                                                                                                                                                                                                                                                                                                                                                                                                                                                                                                                               | Calculation of _exptl_absorpt_correction_mu not performed for this radiation type. |       |                     |
| PLAT002 ALERT 2 C                                                                                                                                                                                                                                                                                                                                                                                                                                                                                                                                                                                                                                                               | Number of Distance or Angle Restraints on AtSite                                   |       | 3 Note              |
| PLAT003 ALERT 4 C                                                                                                                                                                                                                                                                                                                                                                                                                                                                                                                                                                                                                                                               | Flack x Value Deviates > 3.0 * sigma from Zero                                     | 0.066 | Note                |
| PLAT104 ALERT 4 C                                                                                                                                                                                                                                                                                                                                                                                                                                                                                                                                                                                                                                                               | Nr. of Refined C-H H-Atoms in Heavy-Atom Struct.                                   |       | 2 Note              |
| PLAT172 ALERT 4 C                                                                                                                                                                                                                                                                                                                                                                                                                                                                                                                                                                                                                                                               | The CIF-Embedded .res File Contains DFIX Records                                   |       | 1 Report            |
| PLAT012 ALERT 2 C                                                                                                                                                                                                                                                                                                                                                                                                                                                                                                                                                                                                                                                               | Short Inter X...Y Contact O4 ..C5<br>-1/2+x,3/2-y,1-z =                            | 2.94  | Ang-<br>4.466 Check |
| PLAT060 ALERT 3 C                                                                                                                                                                                                                                                                                                                                                                                                                                                                                                                                                                                                                                                               | Number of Least-Squares Restraints .....                                           |       | 2 Note              |
| PLAT001 ALERT 1 C                                                                                                                                                                                                                                                                                                                                                                                                                                                                                                                                                                                                                                                               | No Info/Value for _atom_sites_solution_primary                                     |       | Please Do !         |
| PLAT010 ALERT 1 C                                                                                                                                                                                                                                                                                                                                                                                                                                                                                                                                                                                                                                                               | Missing # of PCP Reflection(s) Below Theta(Min)                                    |       | 1 Note              |
| PLAT011 ALERT 2 C                                                                                                                                                                                                                                                                                                                                                                                                                                                                                                                                                                                                                                                               | Number of OMIT Records in Embedded .res File ...                                   |       | 1 Note              |
| PLAT078 ALERT 2 C                                                                                                                                                                                                                                                                                                                                                                                                                                                                                                                                                                                                                                                               | Number C-C Bonds with Positive Residual Density.                                   |       | 3 Info              |
| <p>0 ALERT level A - Most likely a serious problem - resolve or explain<br/> 0 ALERT level B - A potentially serious problem, consider carefully<br/> 4 ALERT level C - Check. Ensure it is not caused by an omission or oversight<br/> 11 ALERT level G - General information/check it is not something unexpected</p> <p>3 ALKHT type 1 CIF construction/syntax error, inconsistent or missing data<br/> 6 ALKHT type 2 Indicator that the structure model may be wrong or deficient<br/> 3 ALKHT type 3 Indicator that the structure quality may be low<br/> 3 ALKHT type 4 Improvement, methodology, query or suggestion<br/> 0 ALKHT type 5 Informative message, check</p> |                                                                                    |       |                     |

All these data can be obtained free of charge from Cambridge Crystallographic Data Centre via [www.ccdc.cam.ac.uk/data\\_request/ci](http://www.ccdc.cam.ac.uk/data_request/ci).

## X. NMR Spectra

### Compound 3a

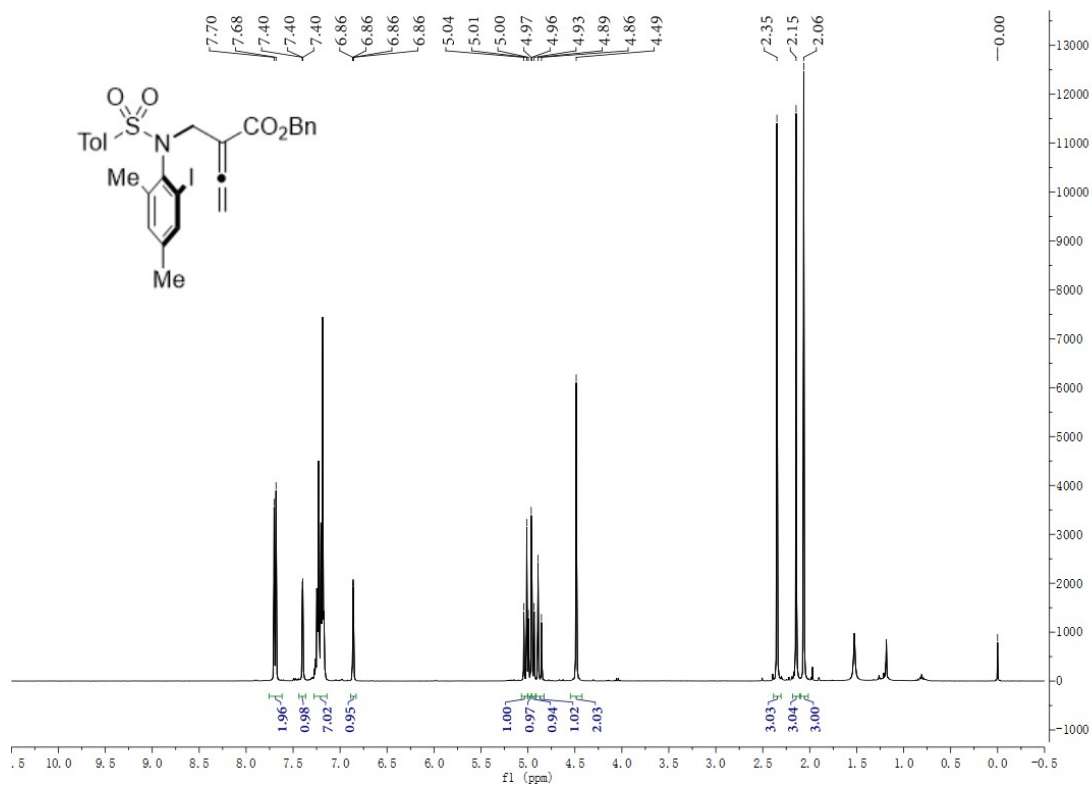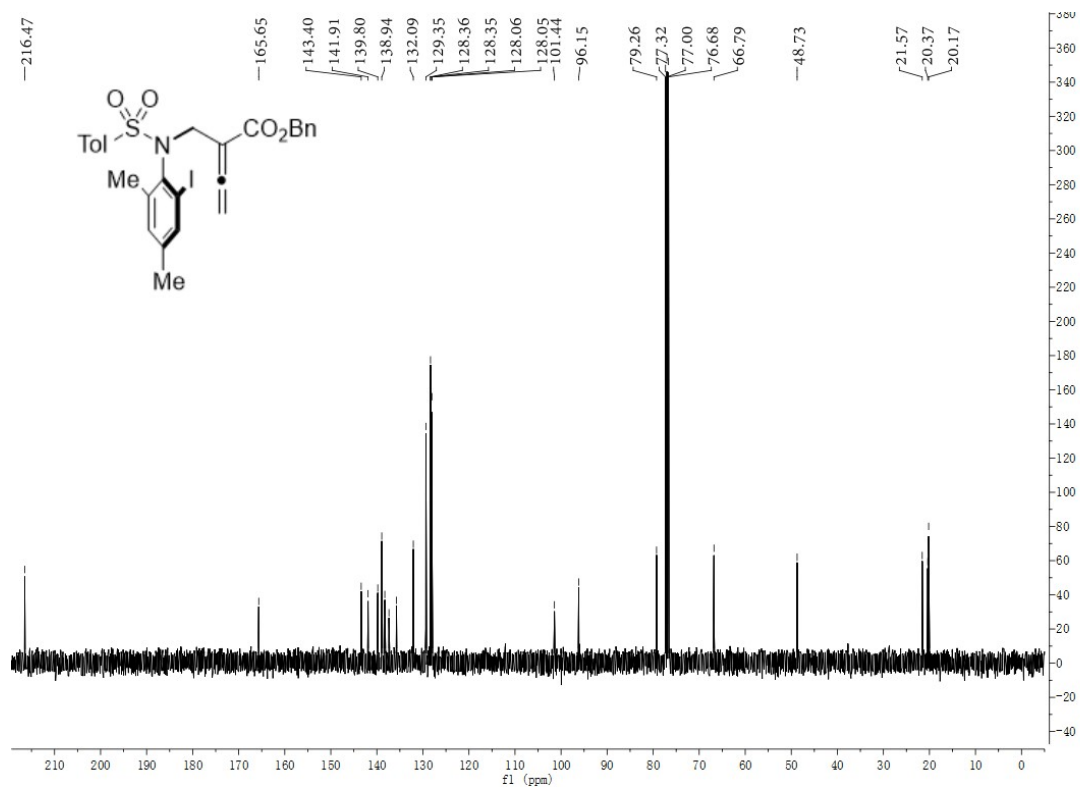

Compound **3b**

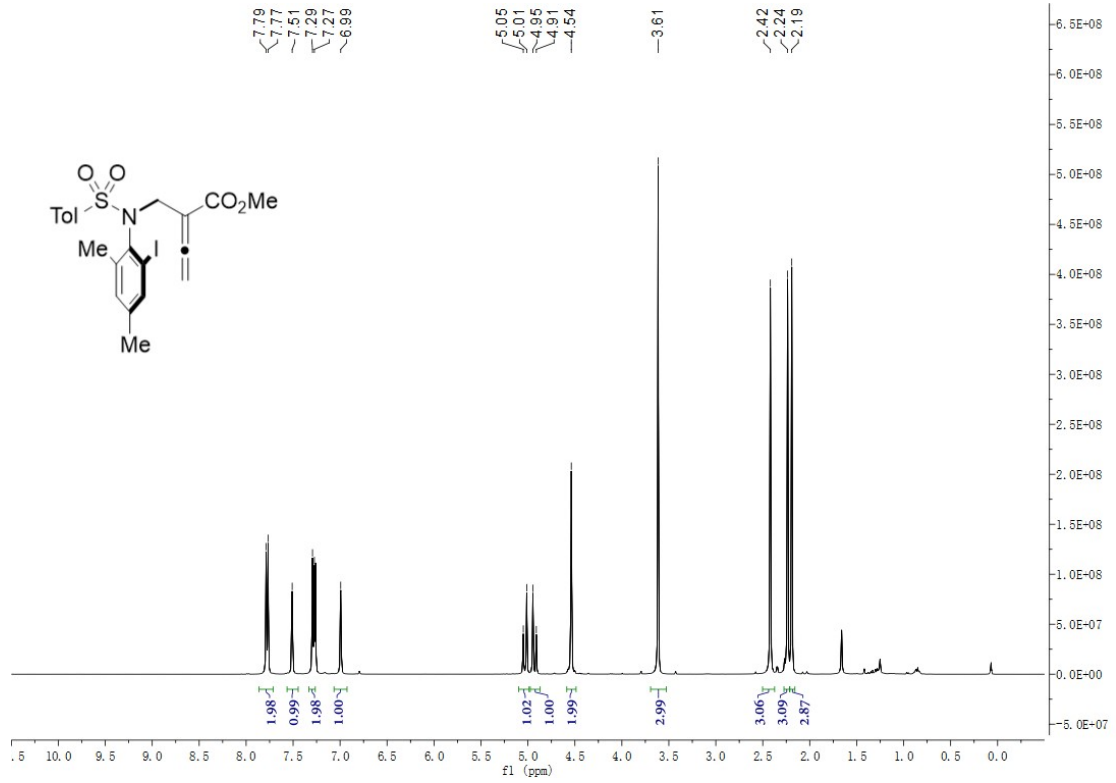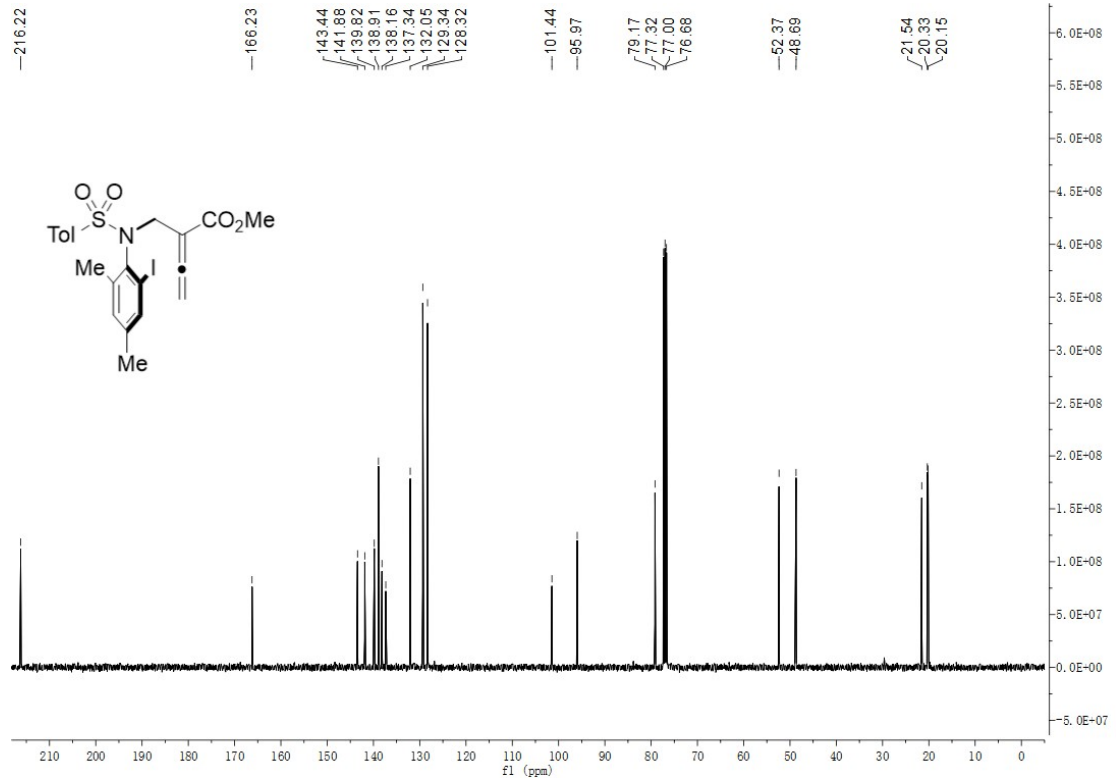

# Compound 3c

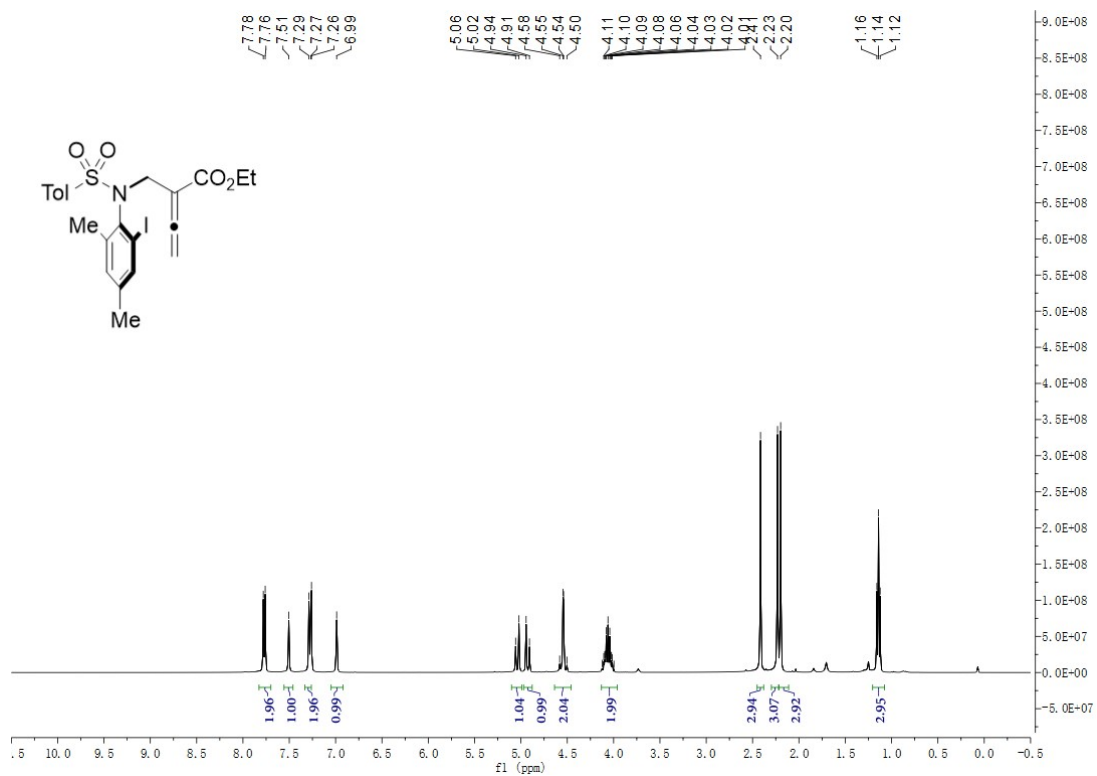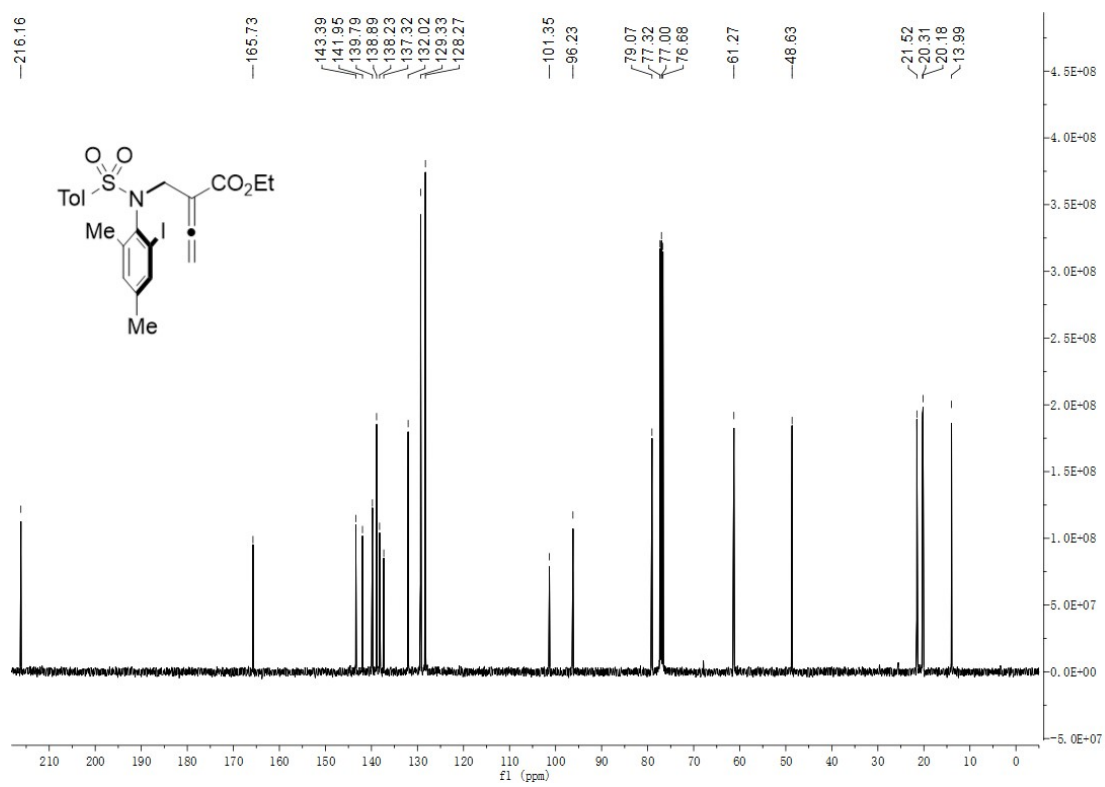

Compound 3d

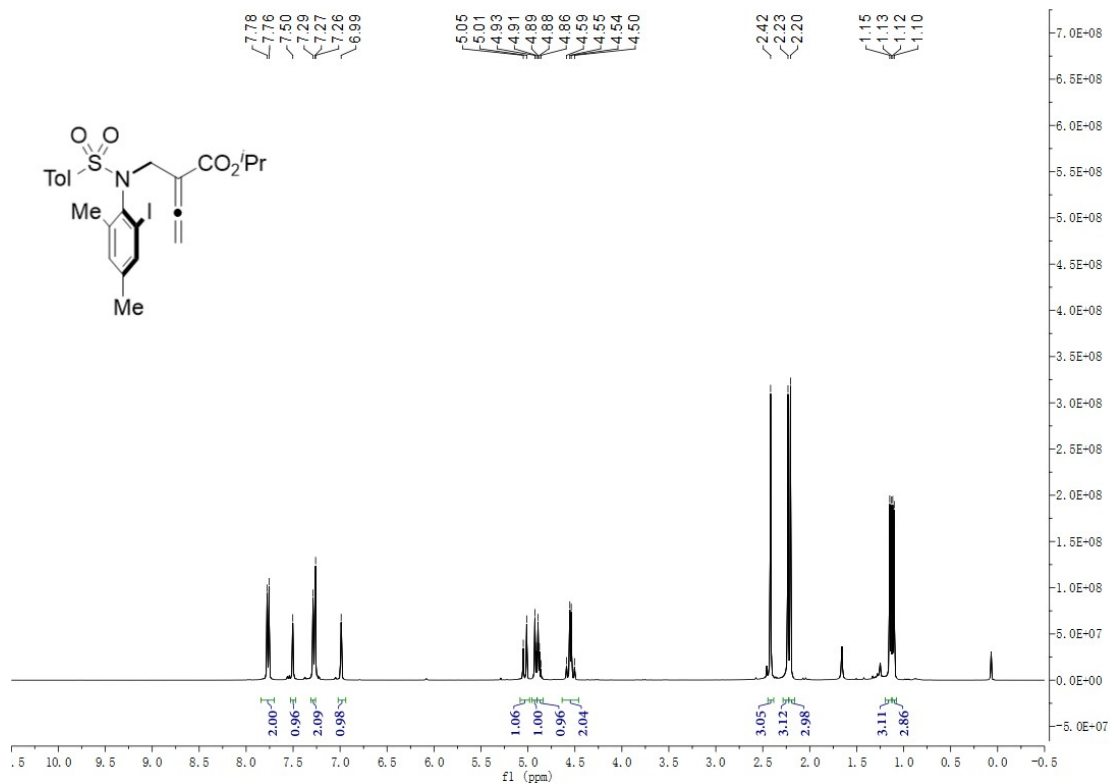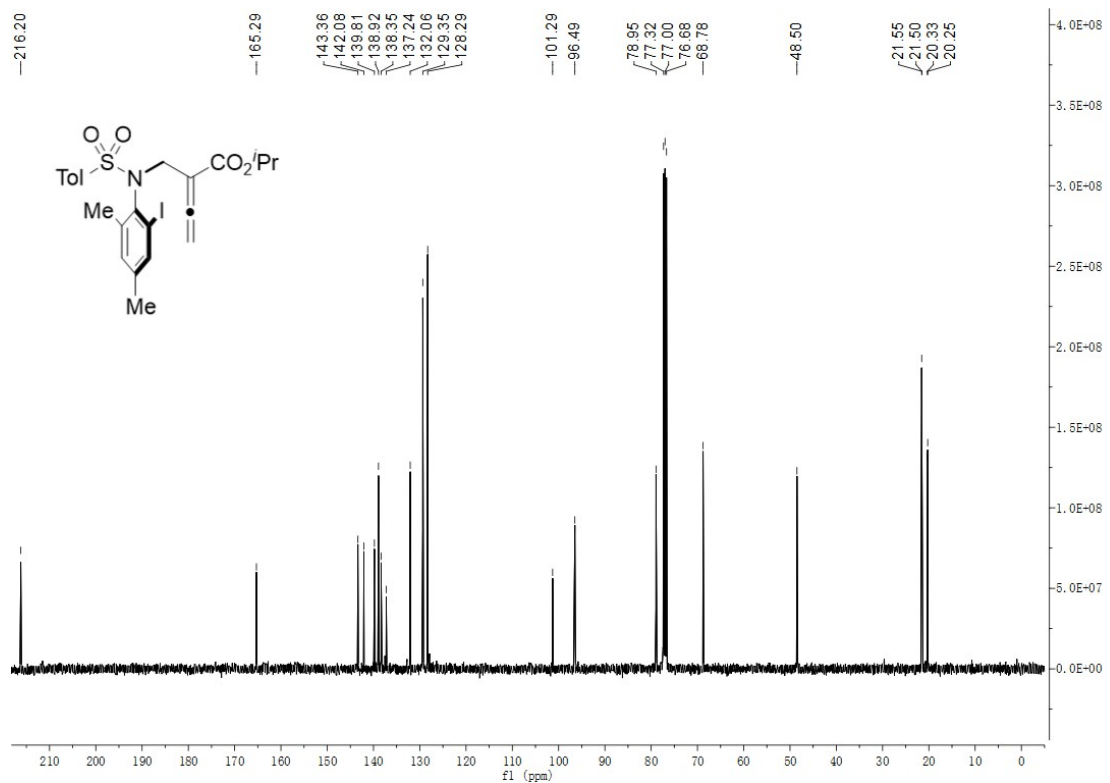

# Compound 3e

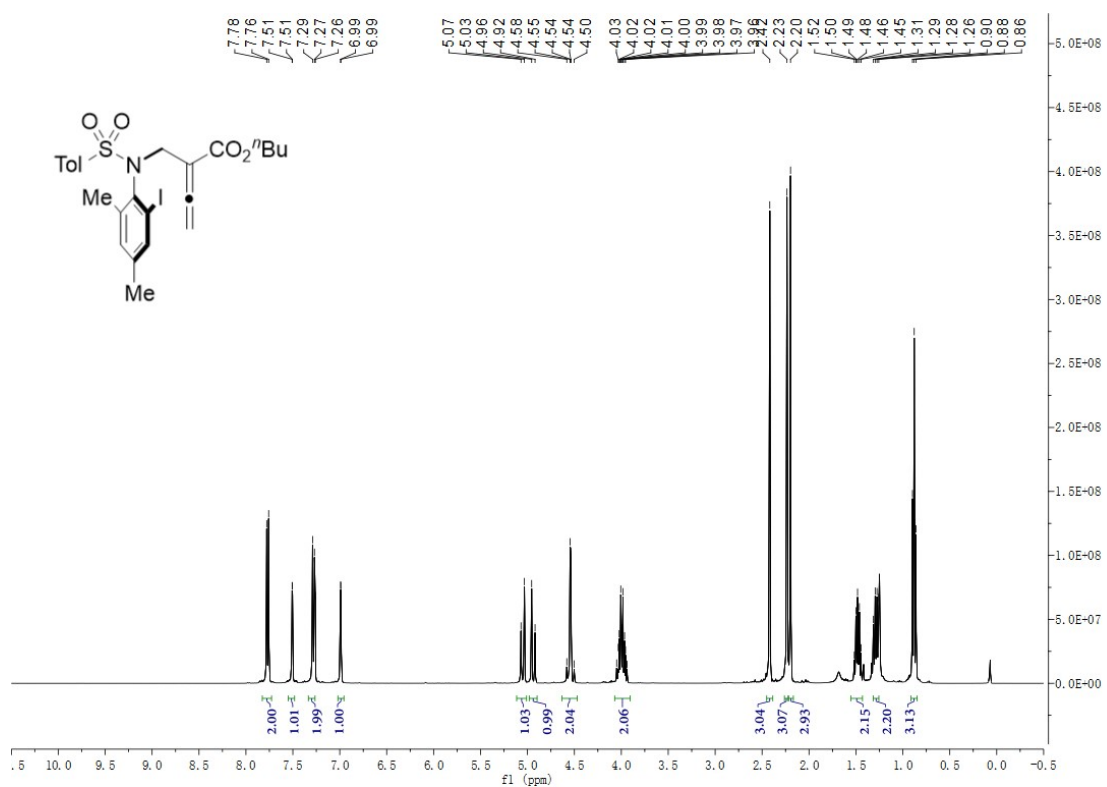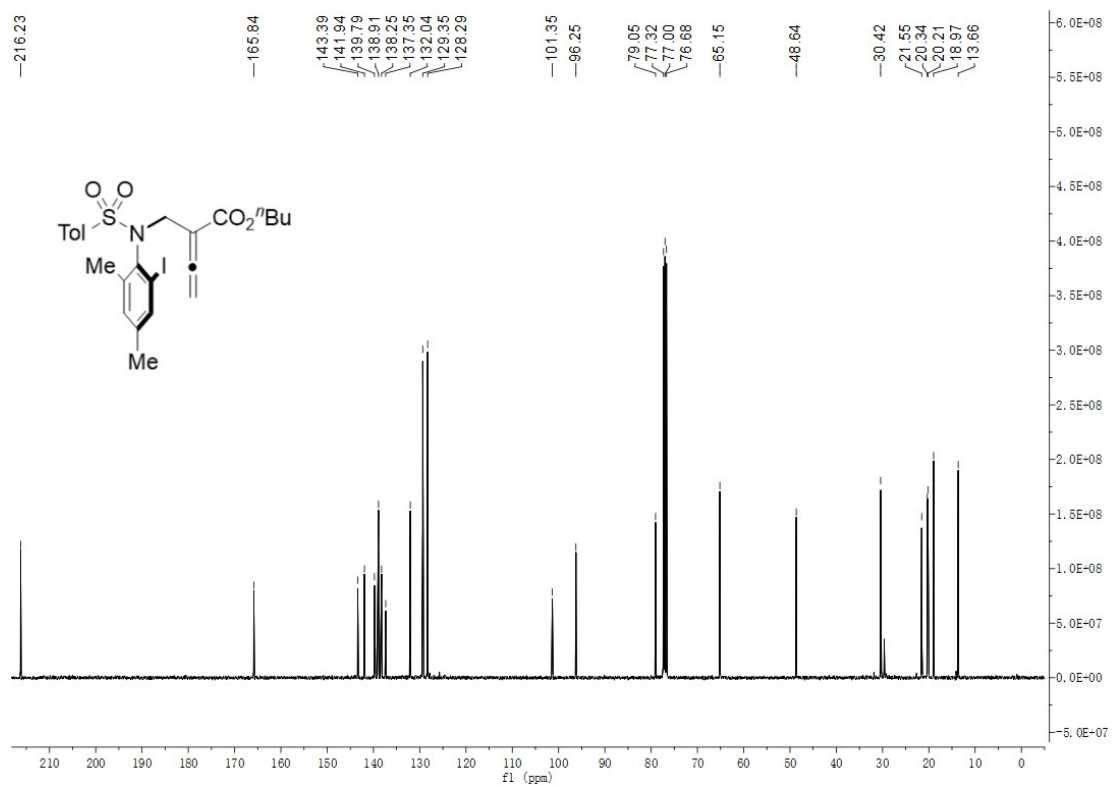

Compound 3f

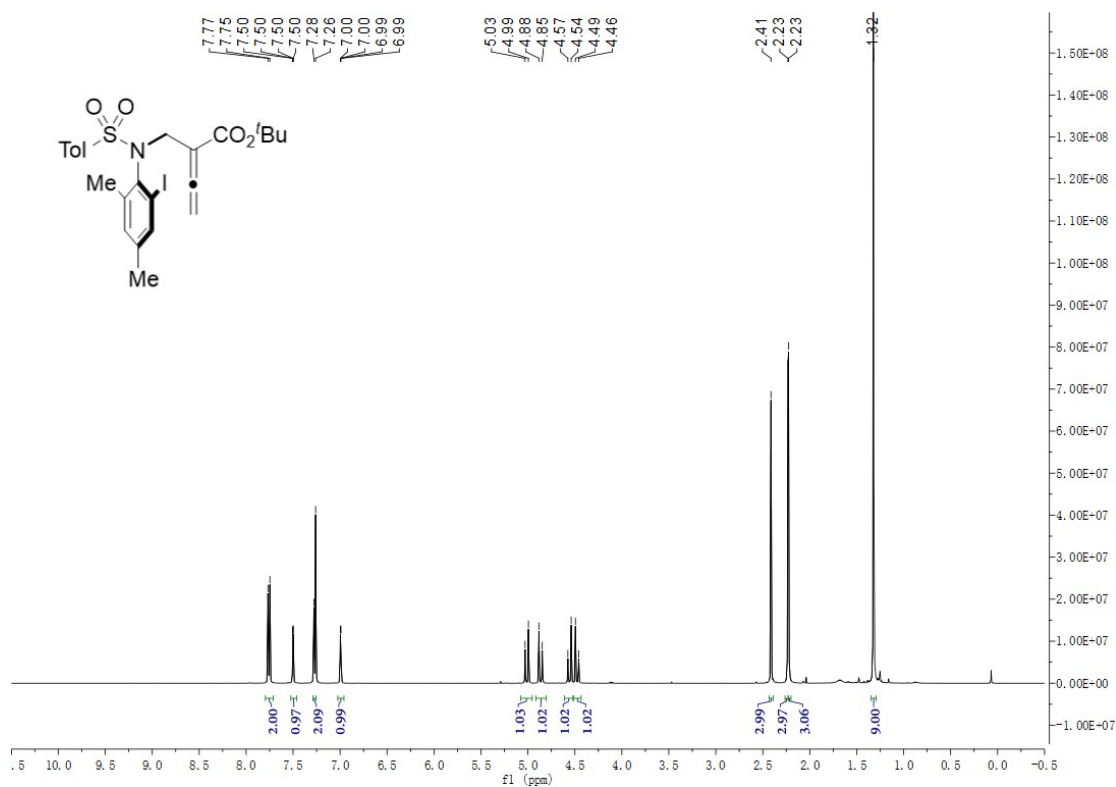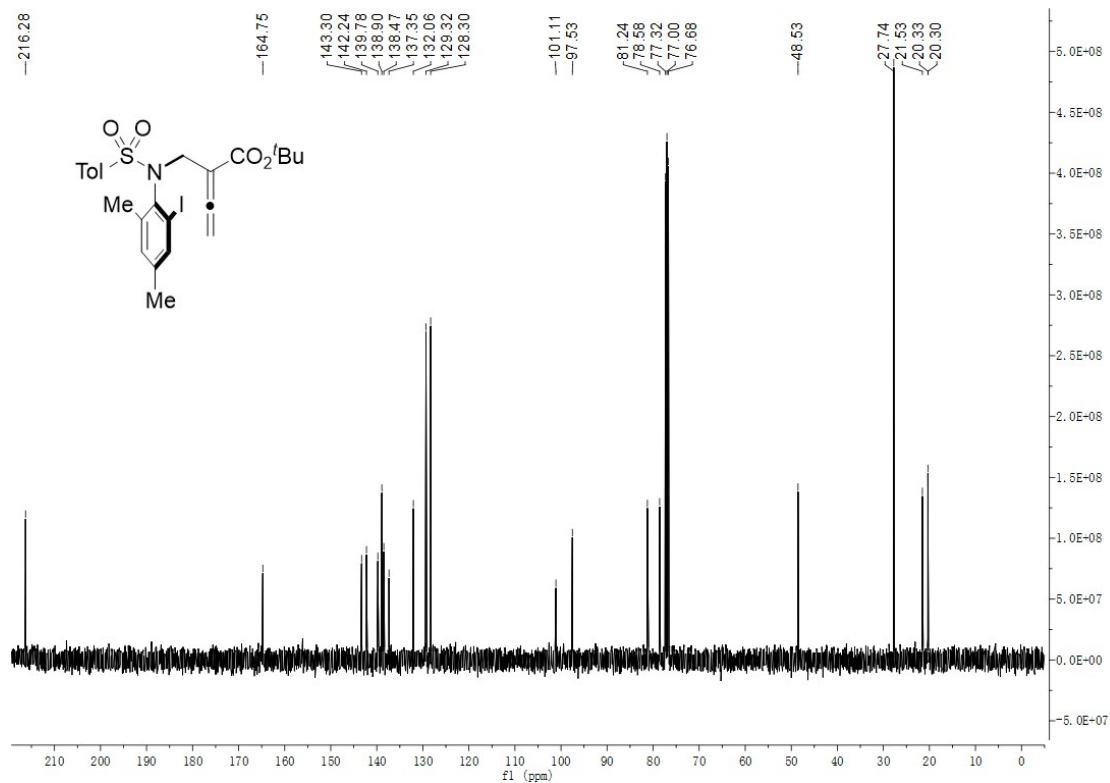



Compound 3g

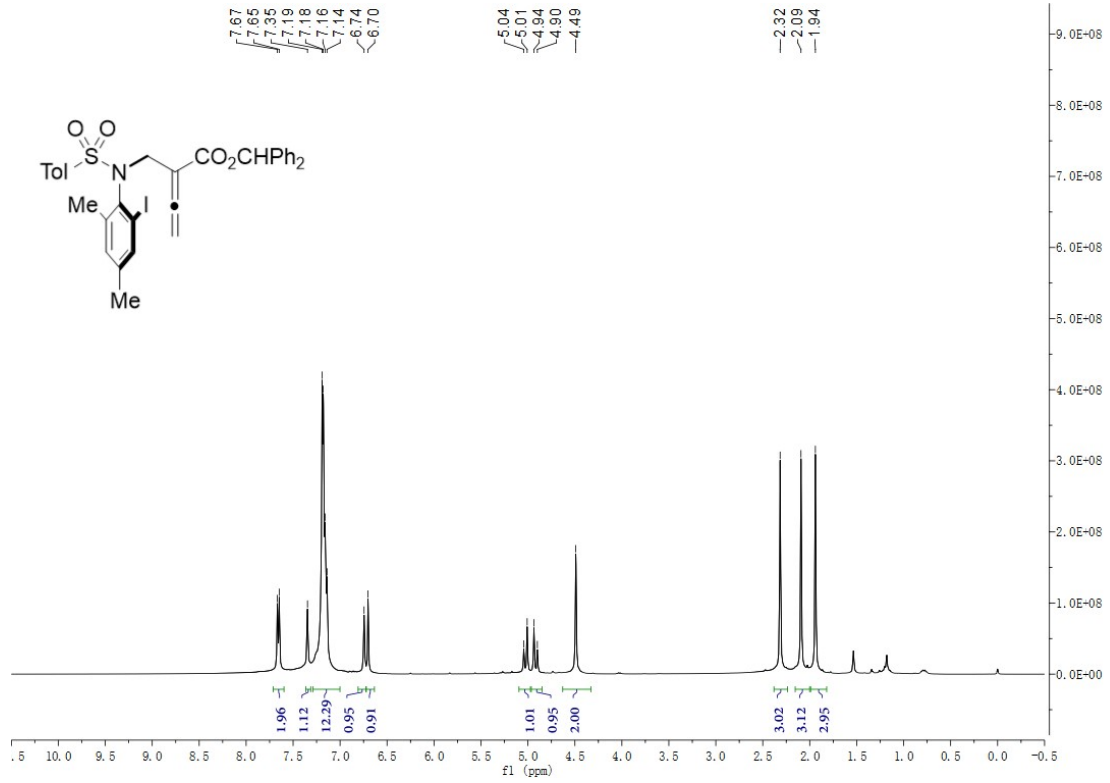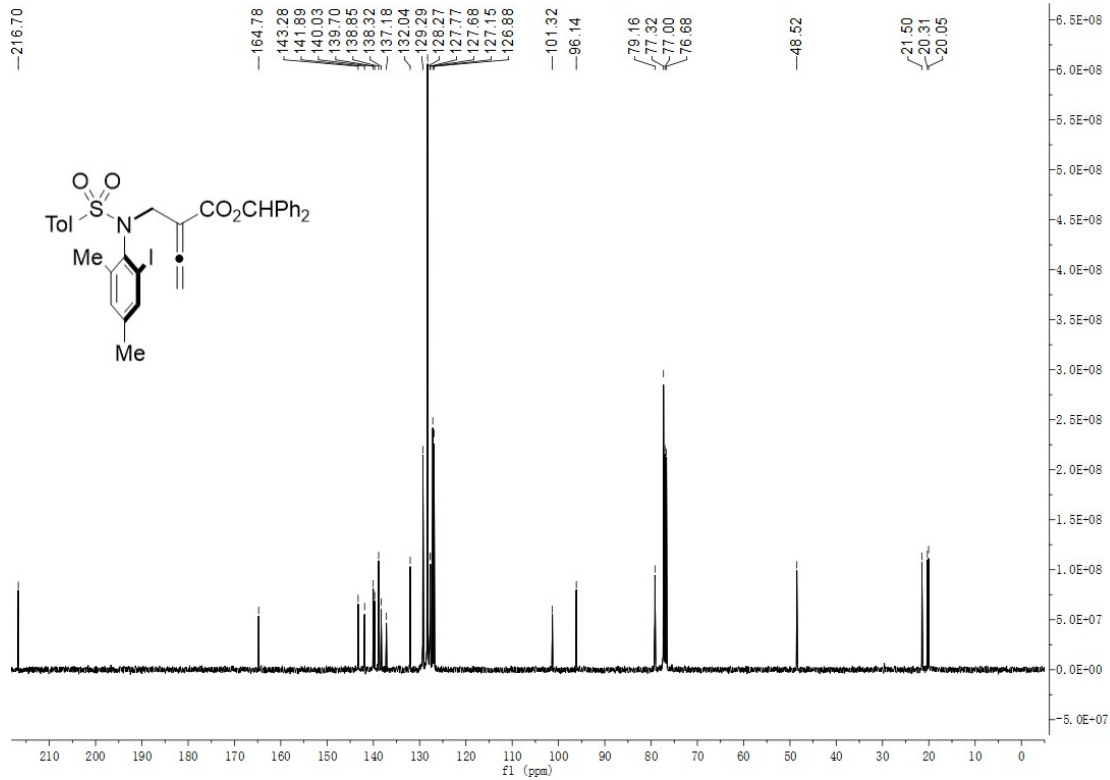

Compound 3h

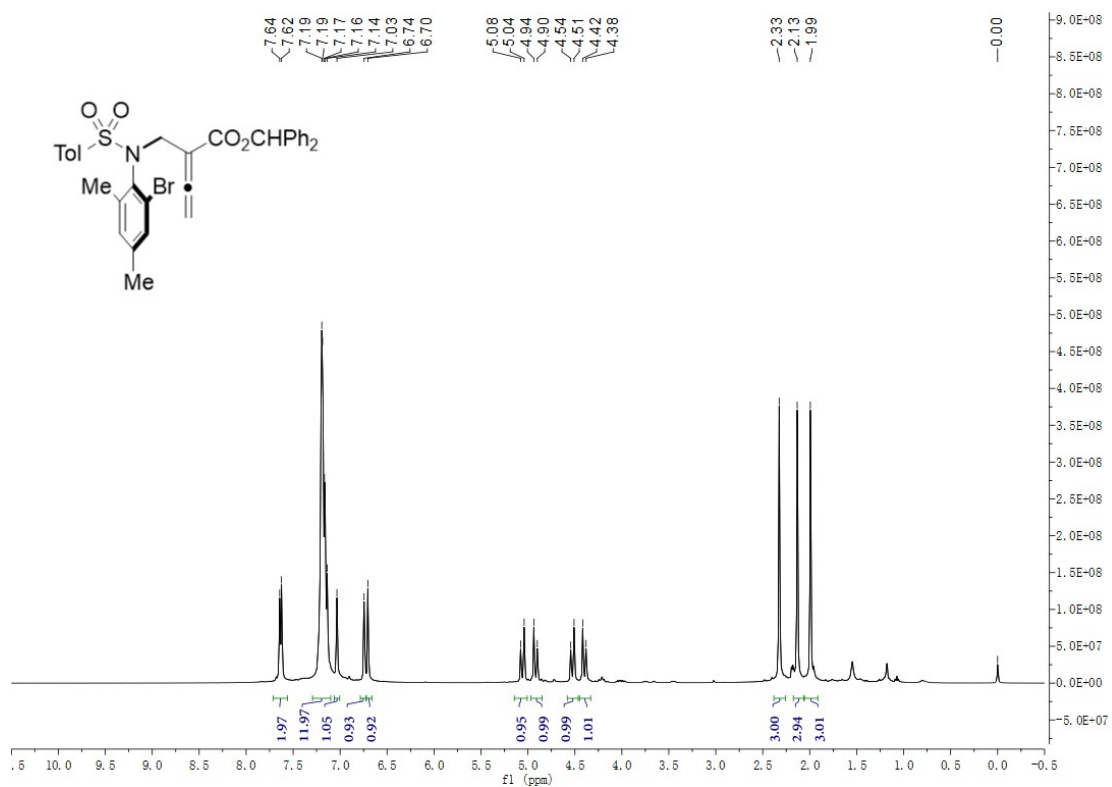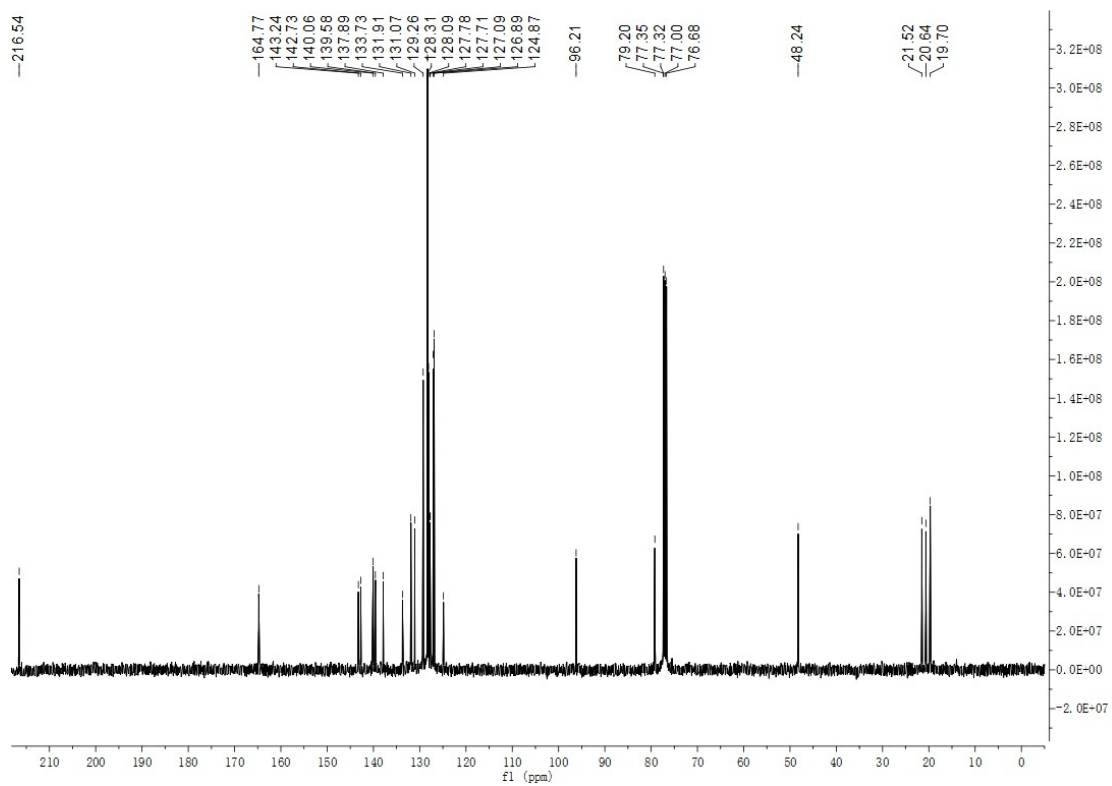

Compound 3i

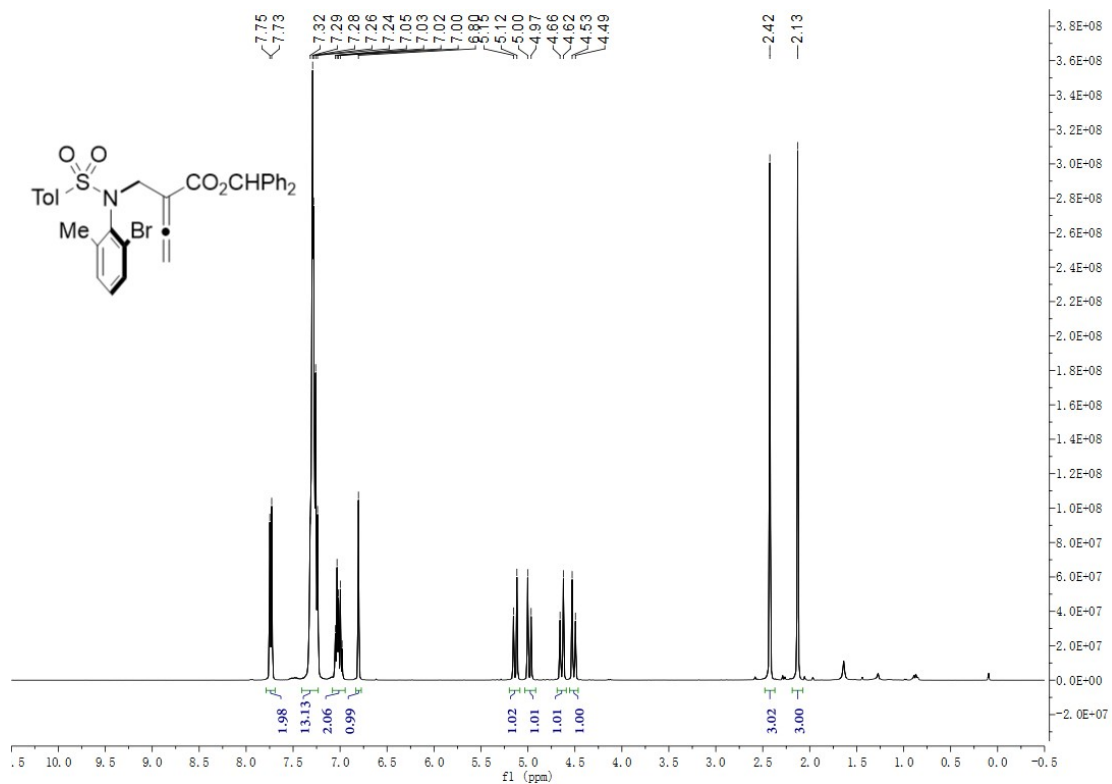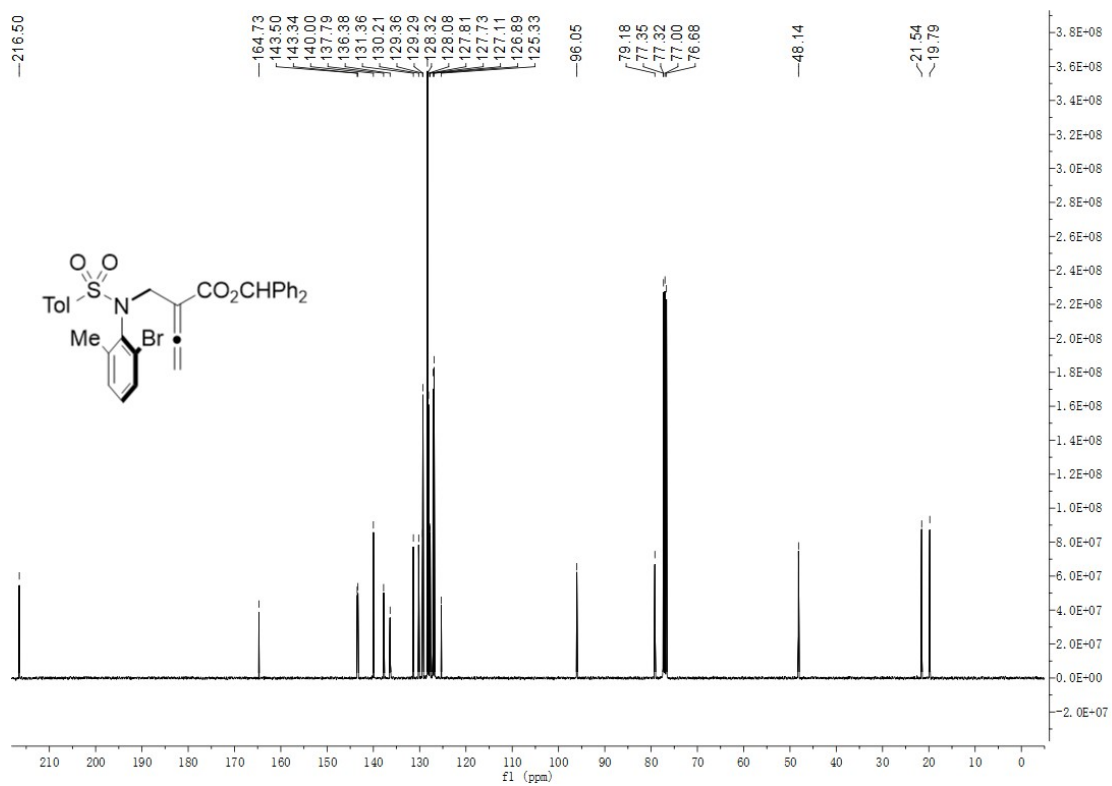

# Compound 3j

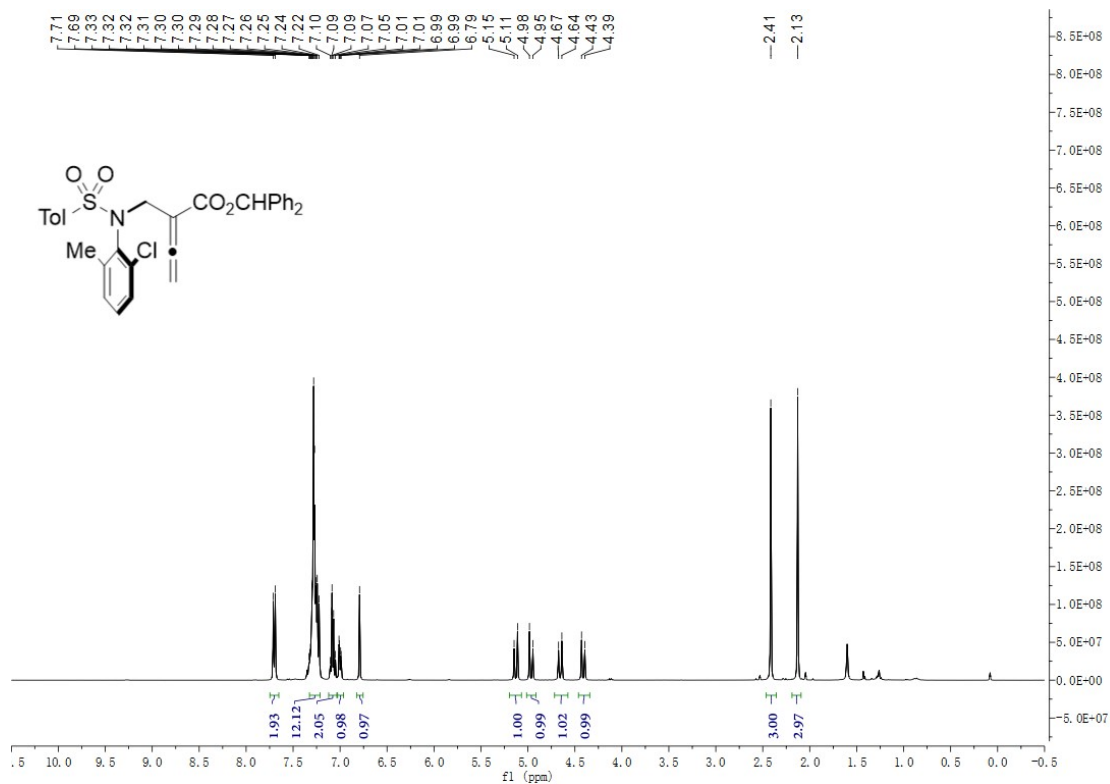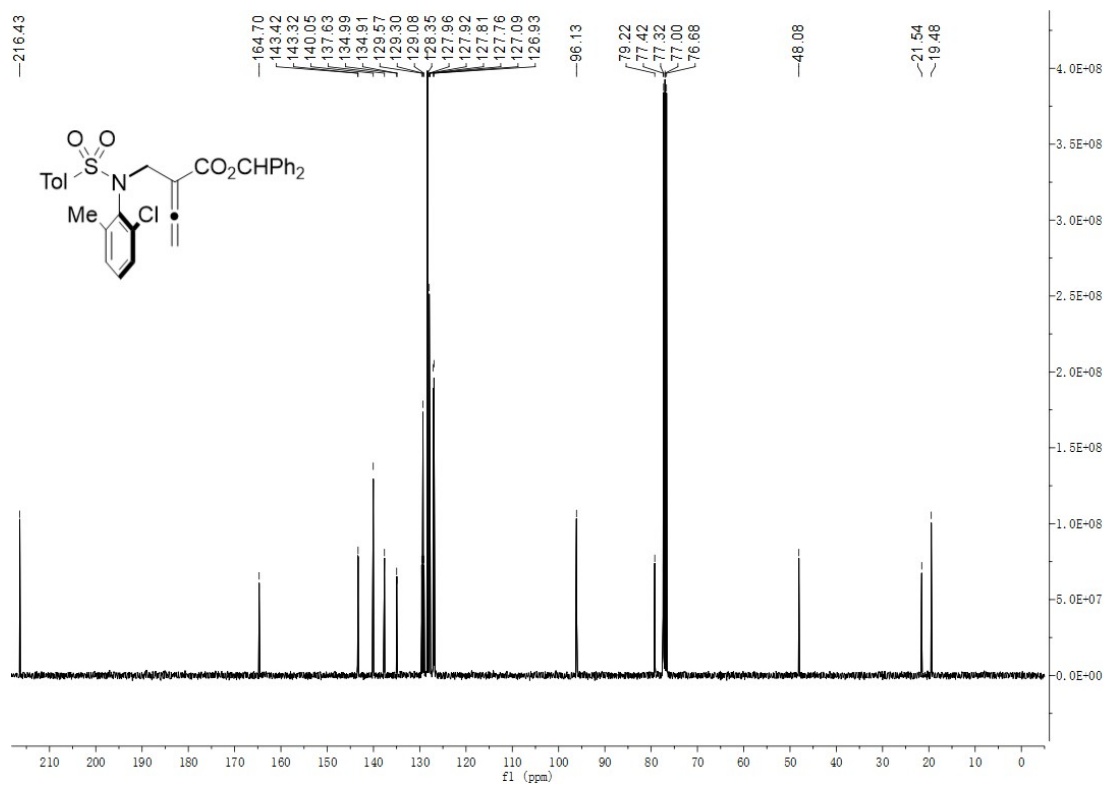

Compound 3k

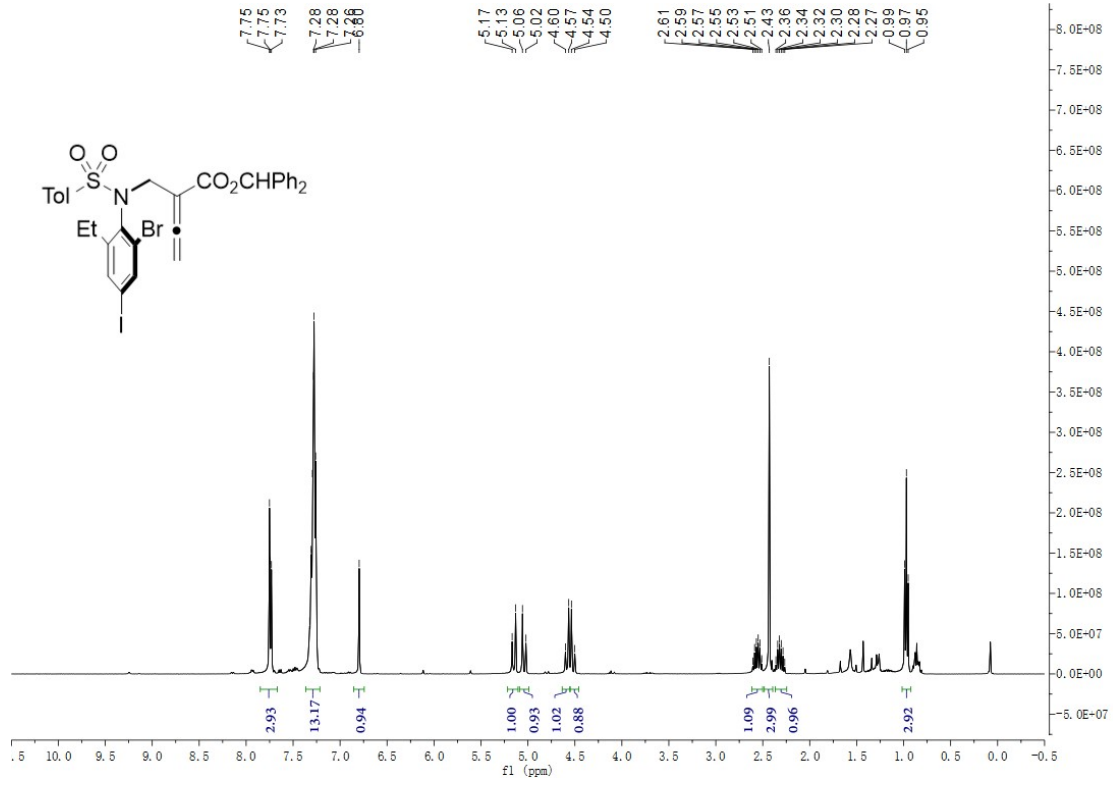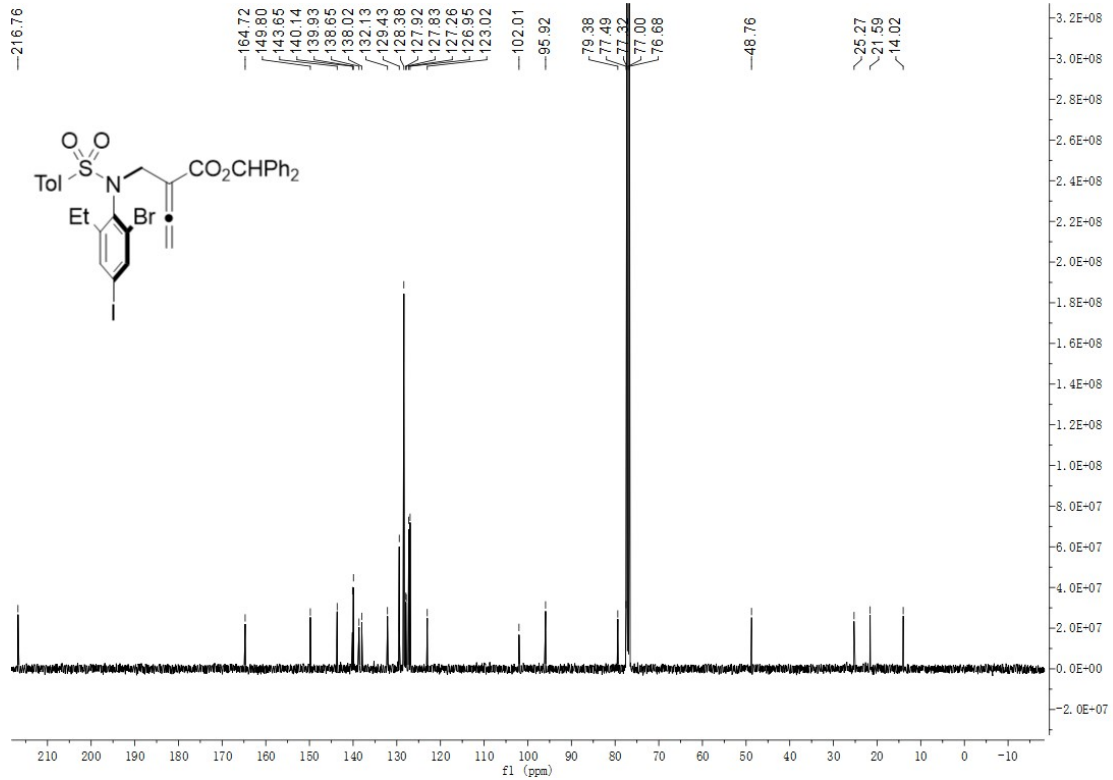

# Compound 31

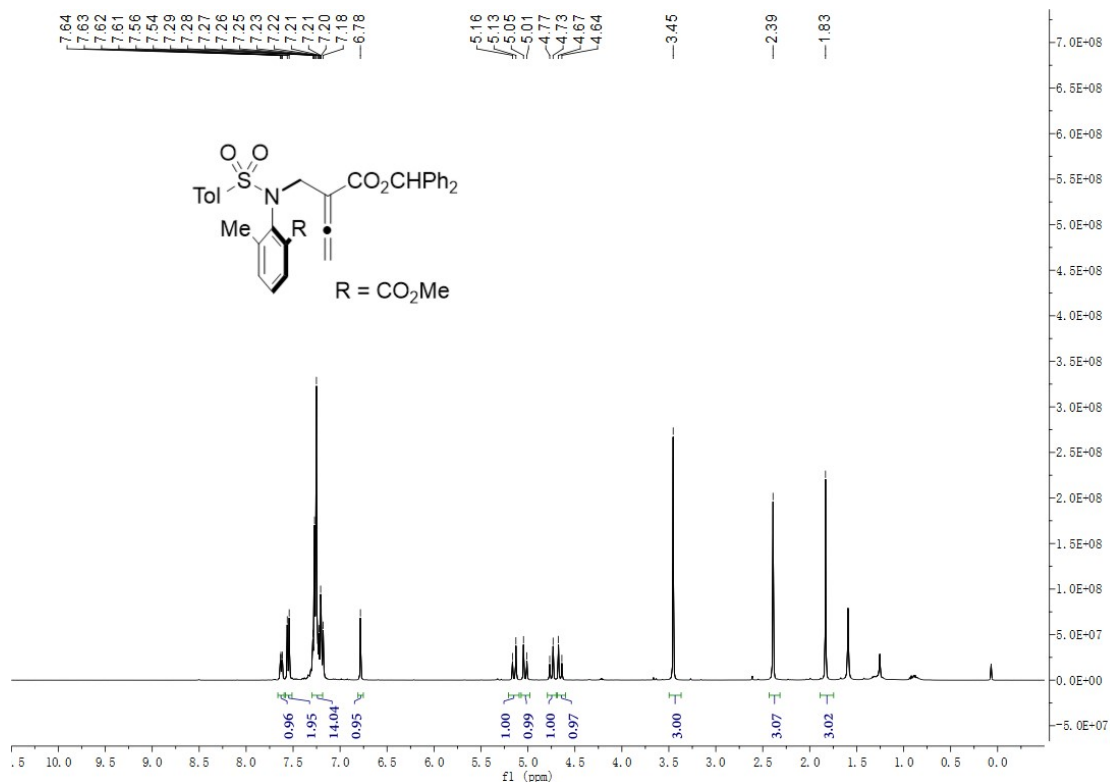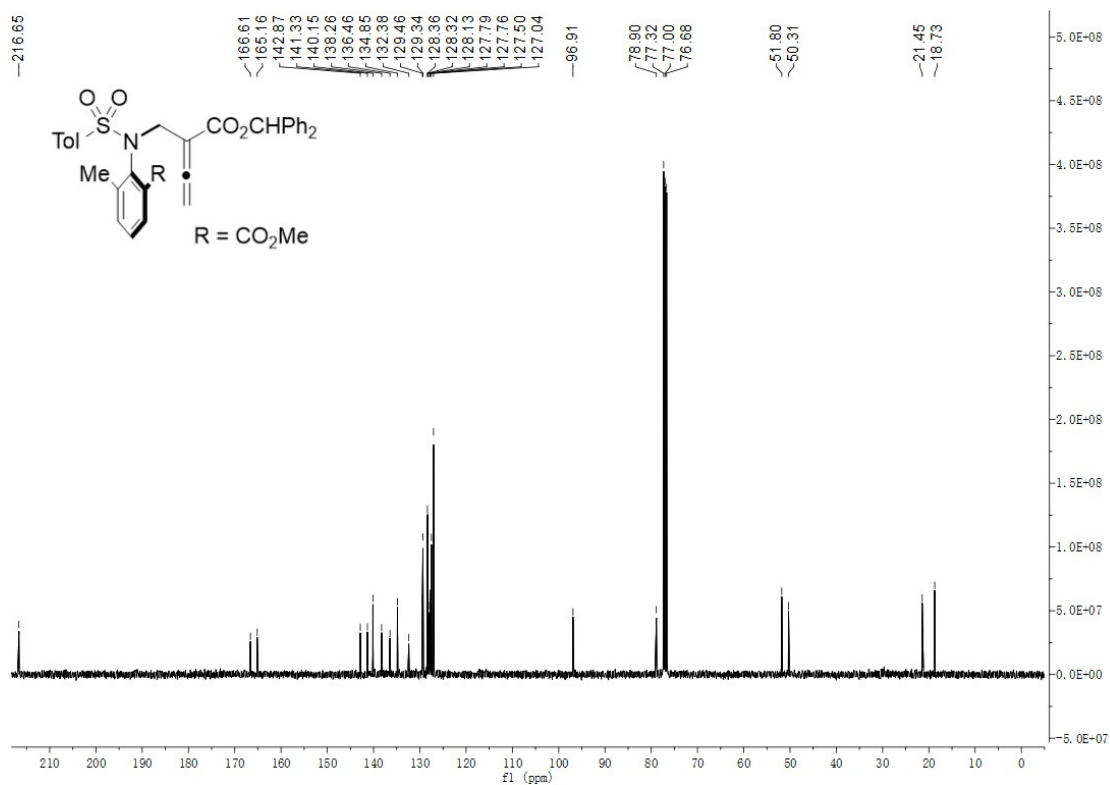

Compound 3m

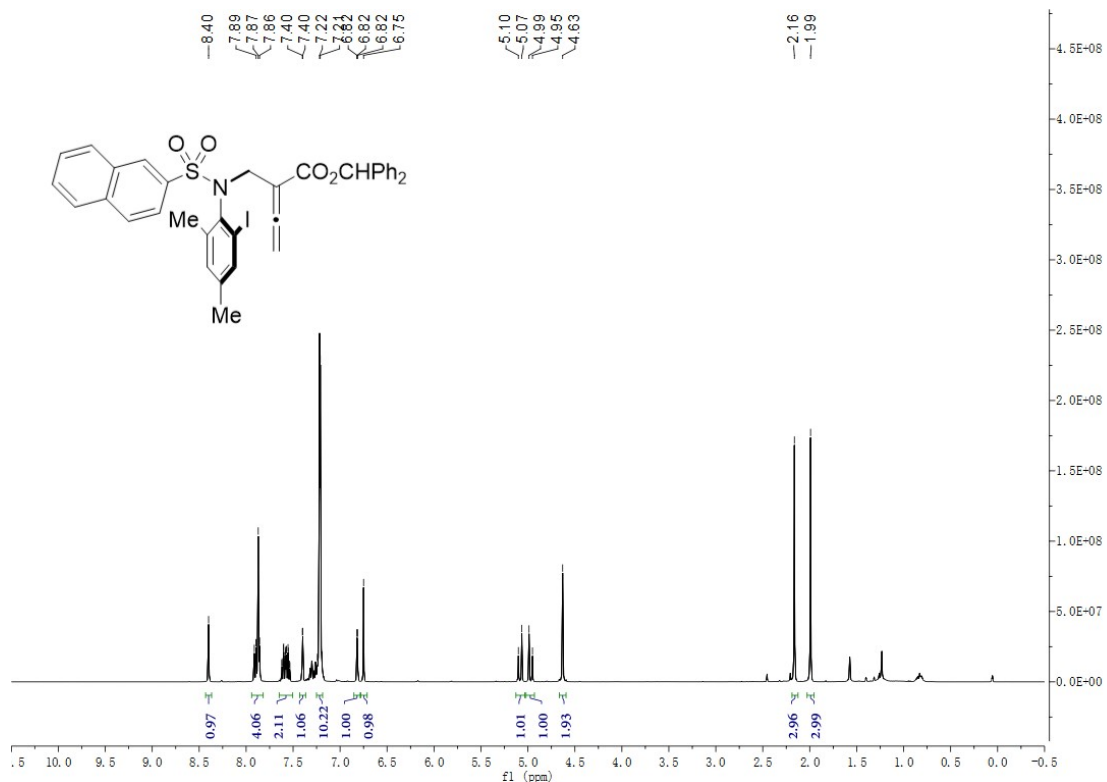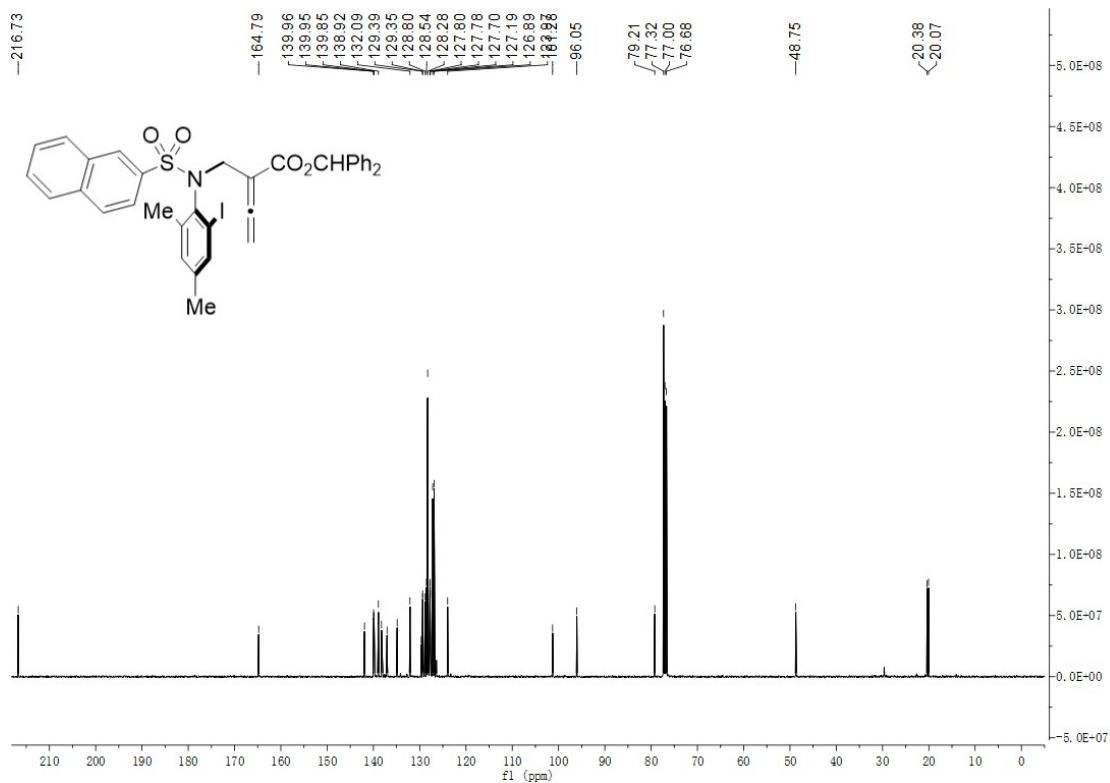

Compound 3n

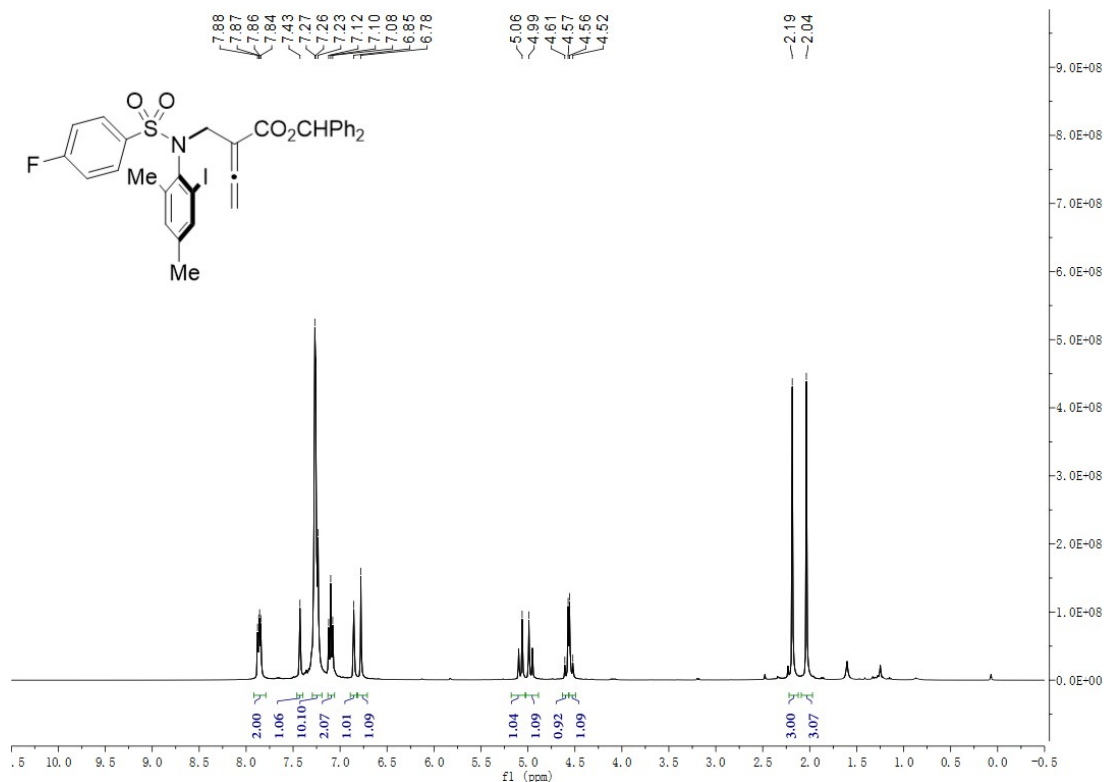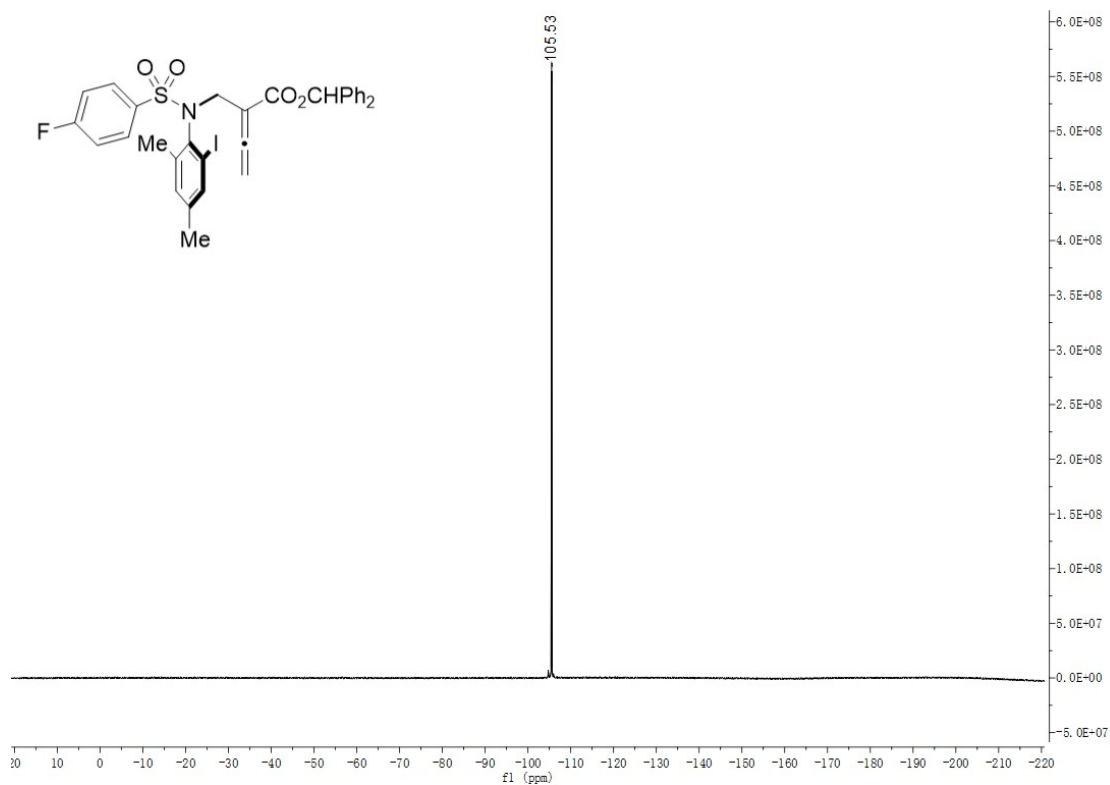



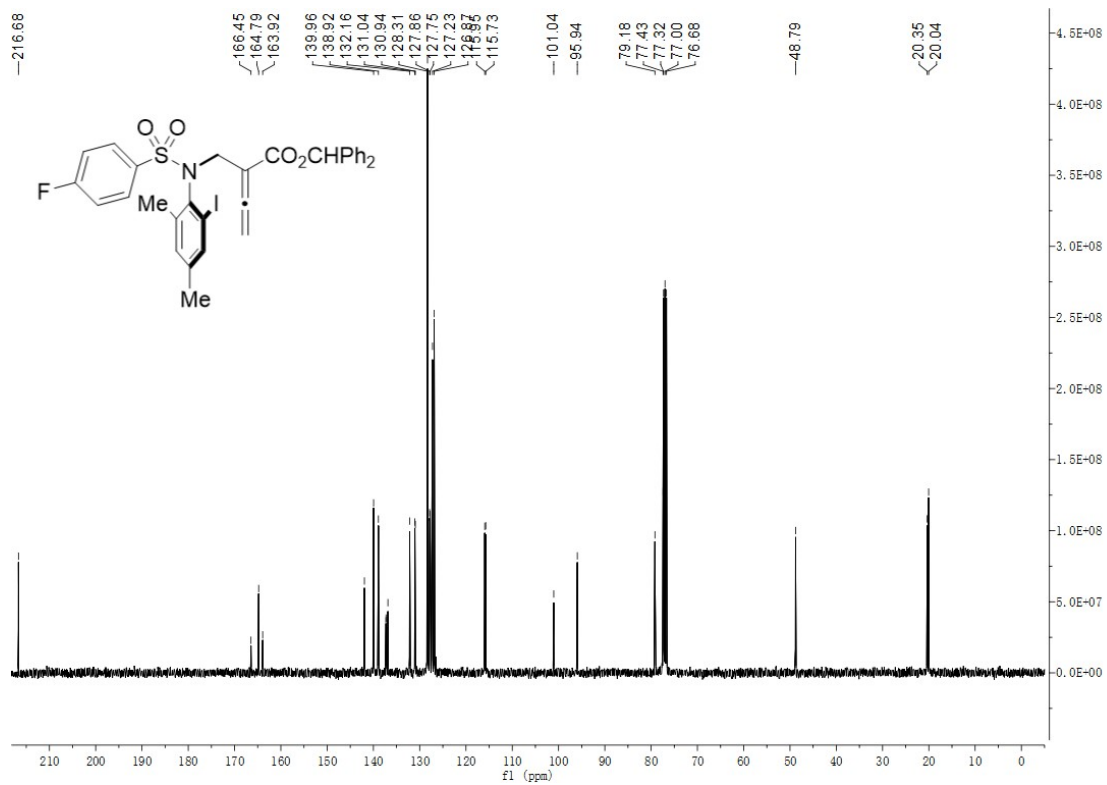

### Compound 30

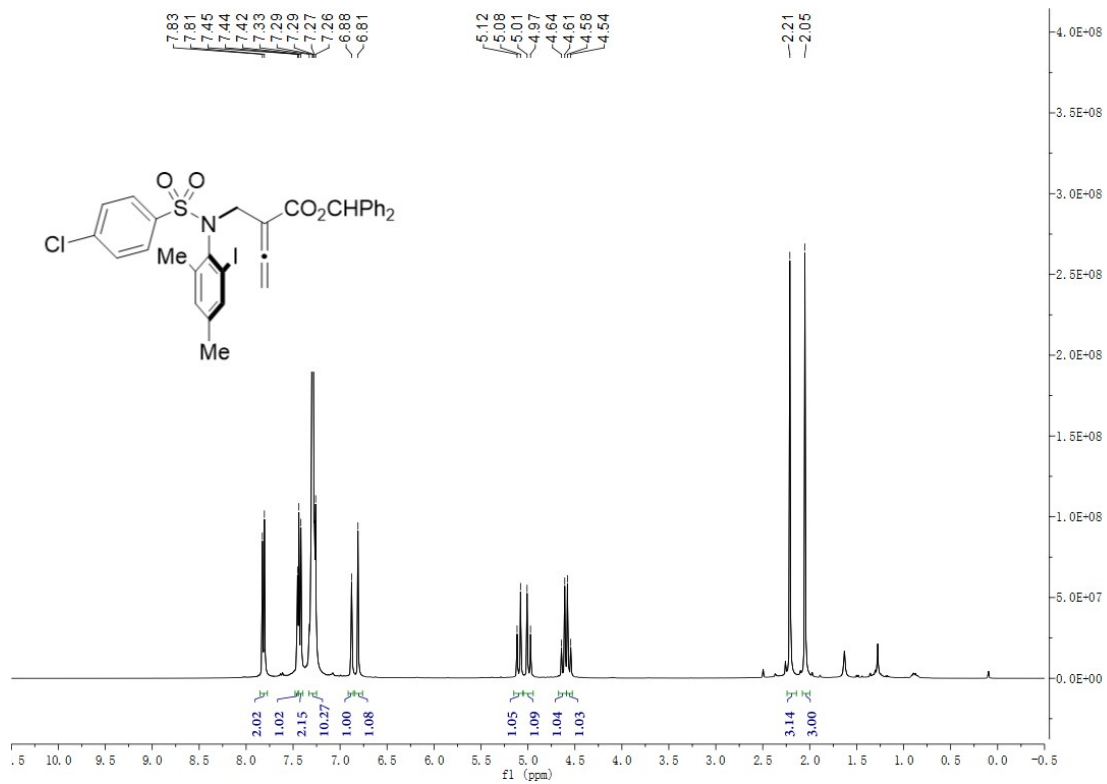

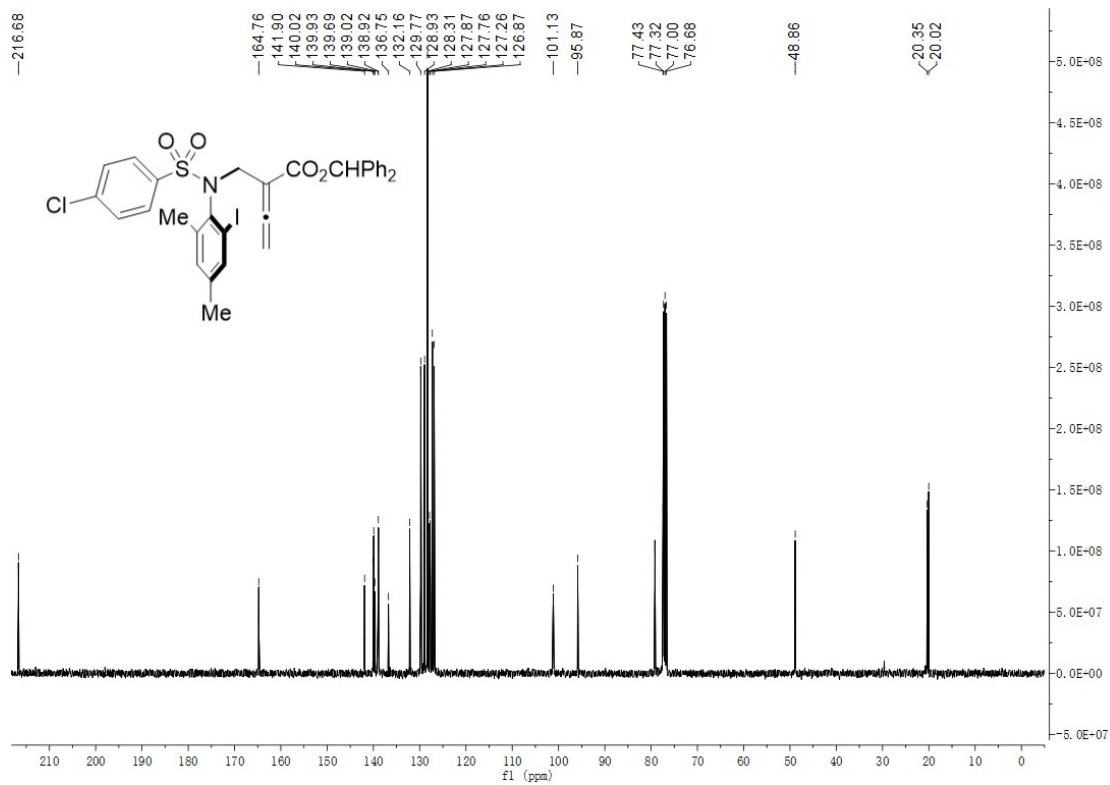

### Compound 3p

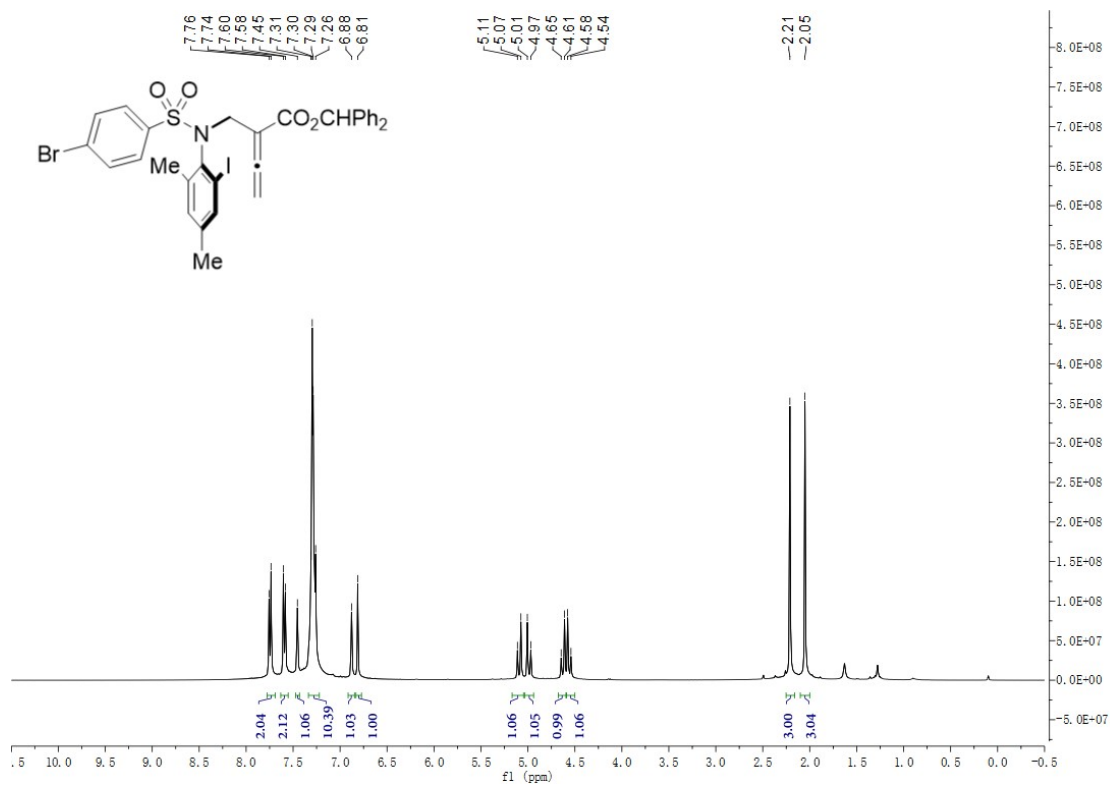

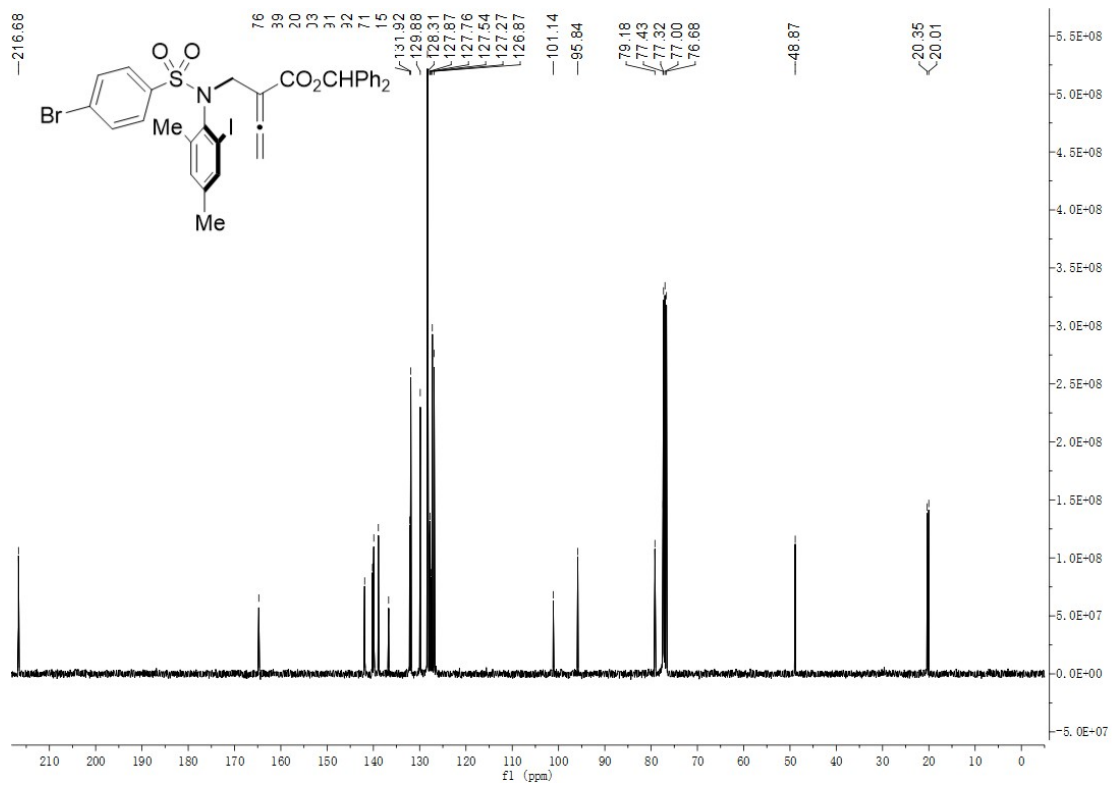

### Compound 3q

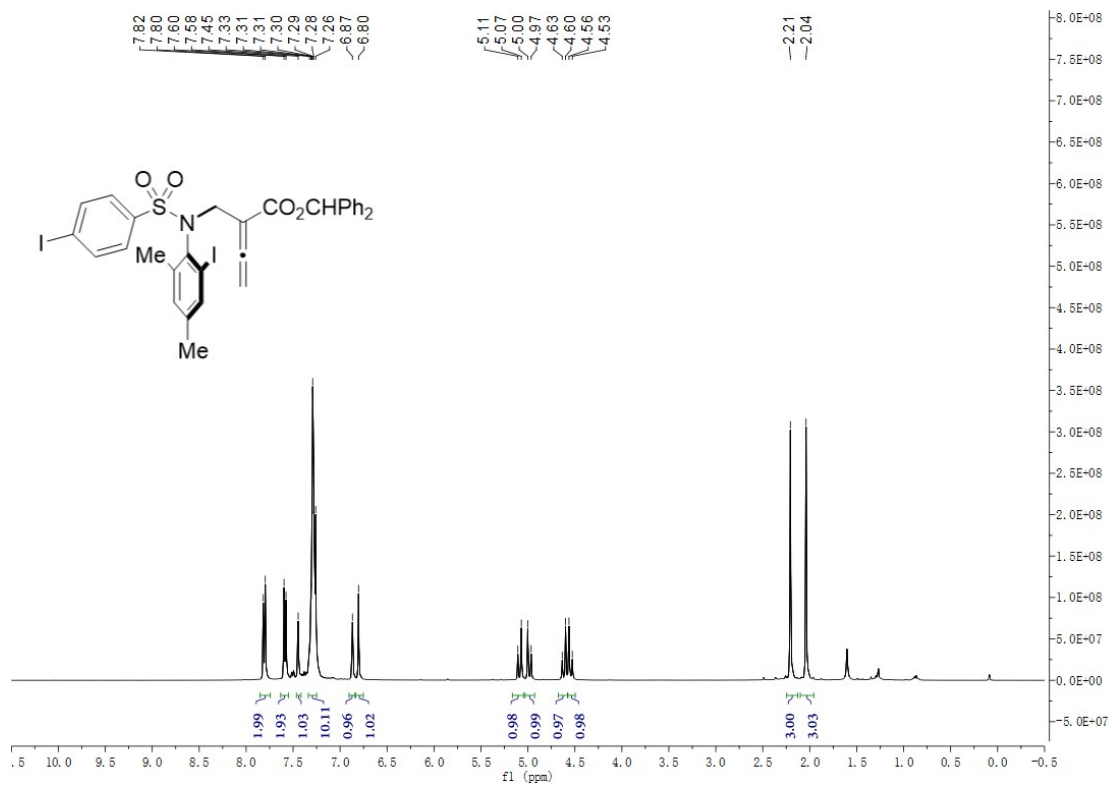

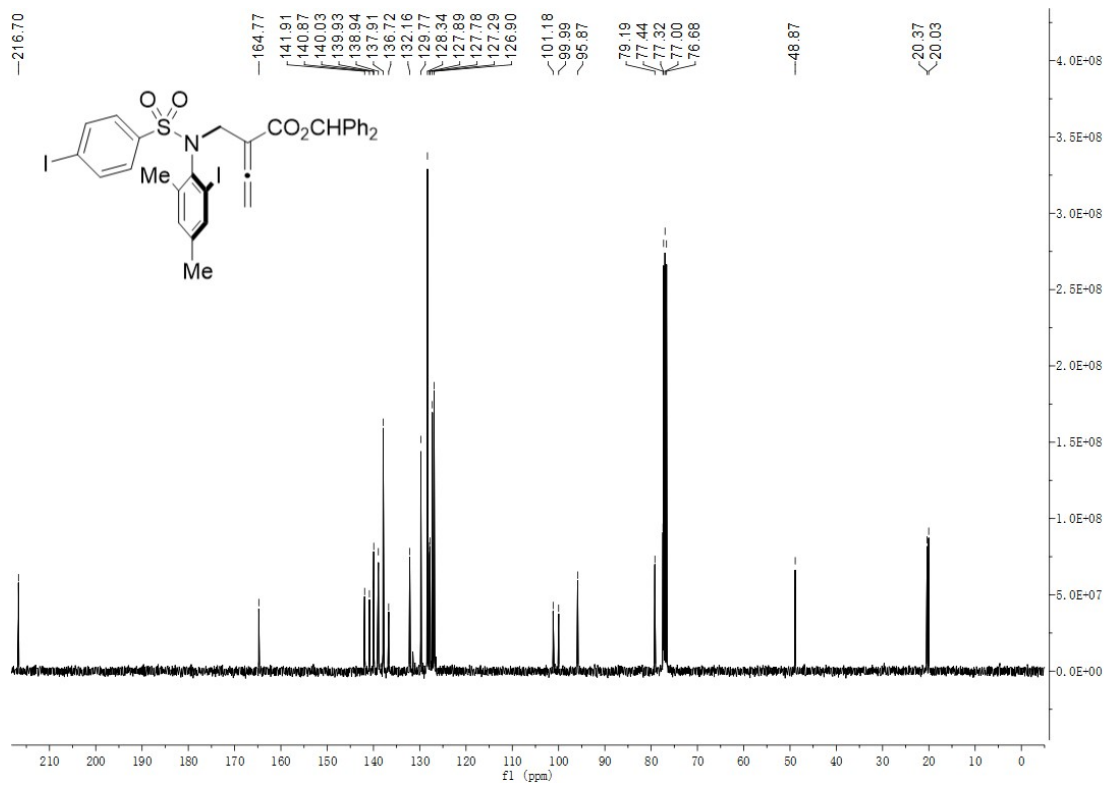

### Compound 3r

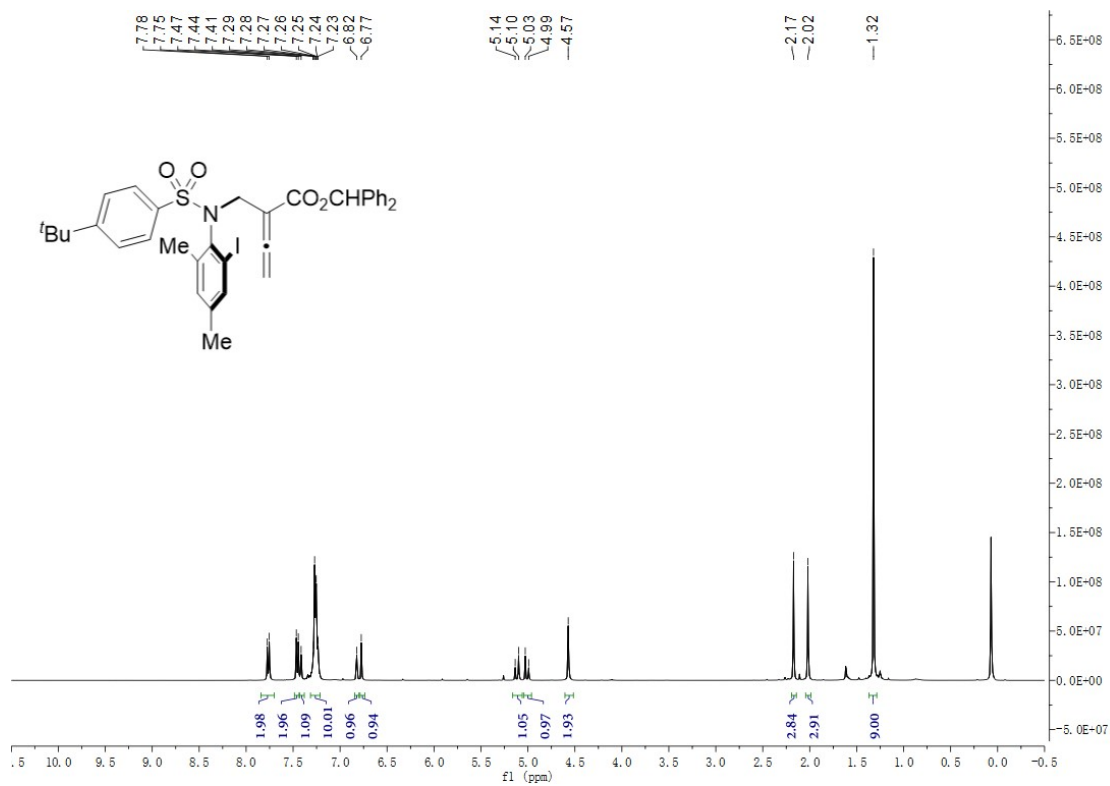

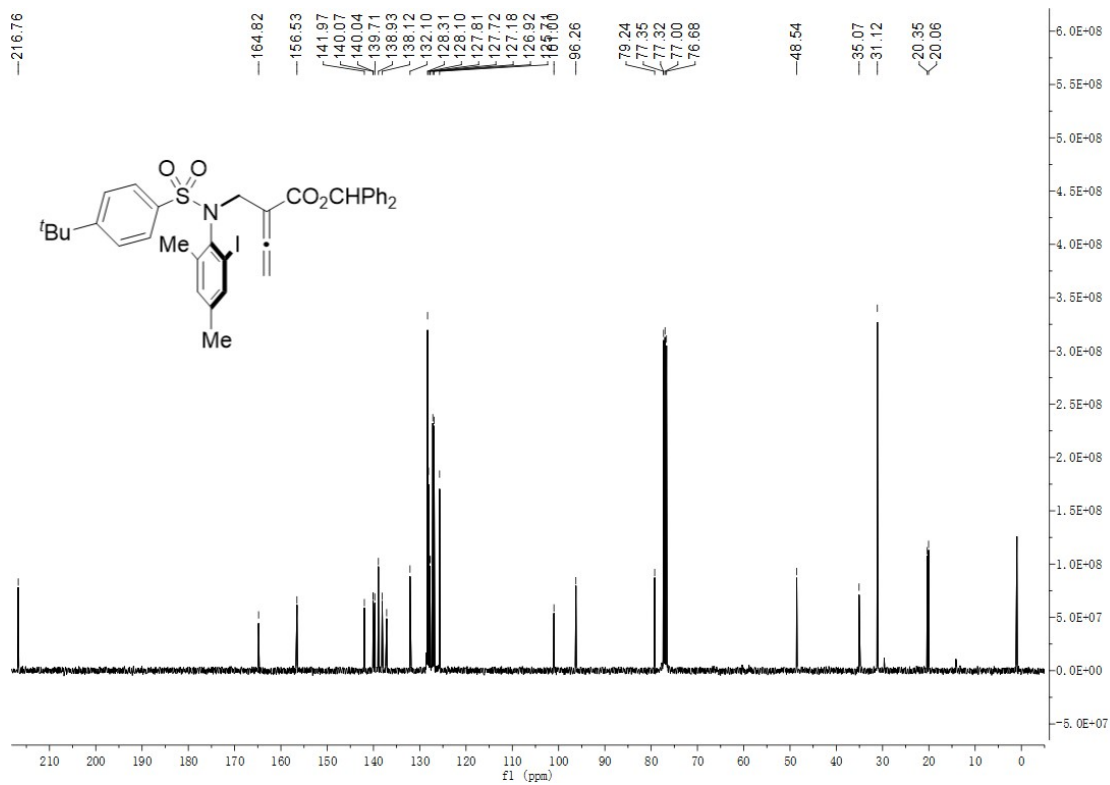

### Compound 3s

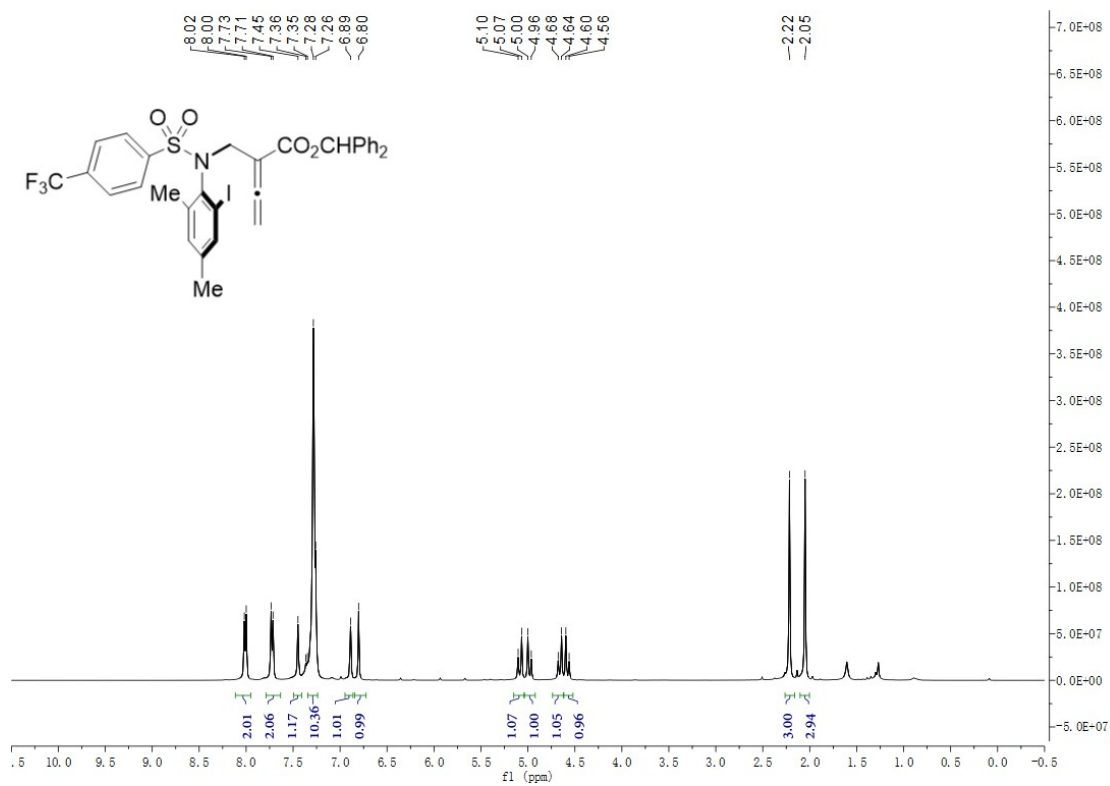

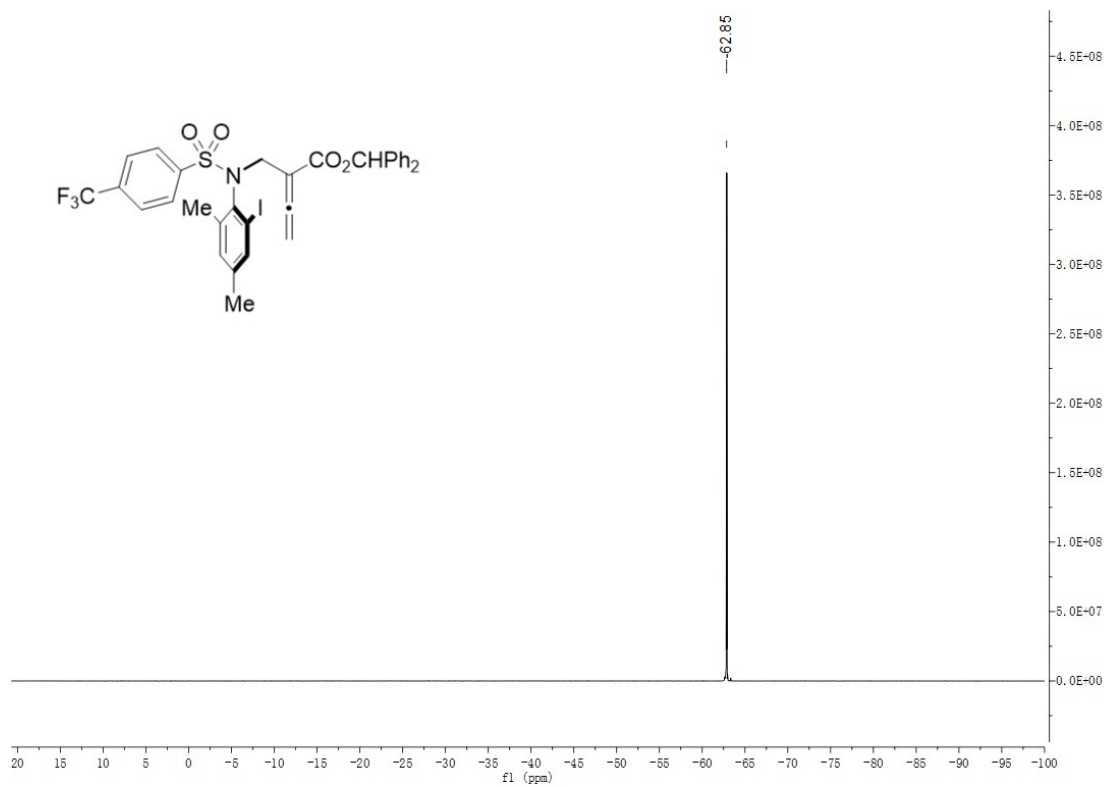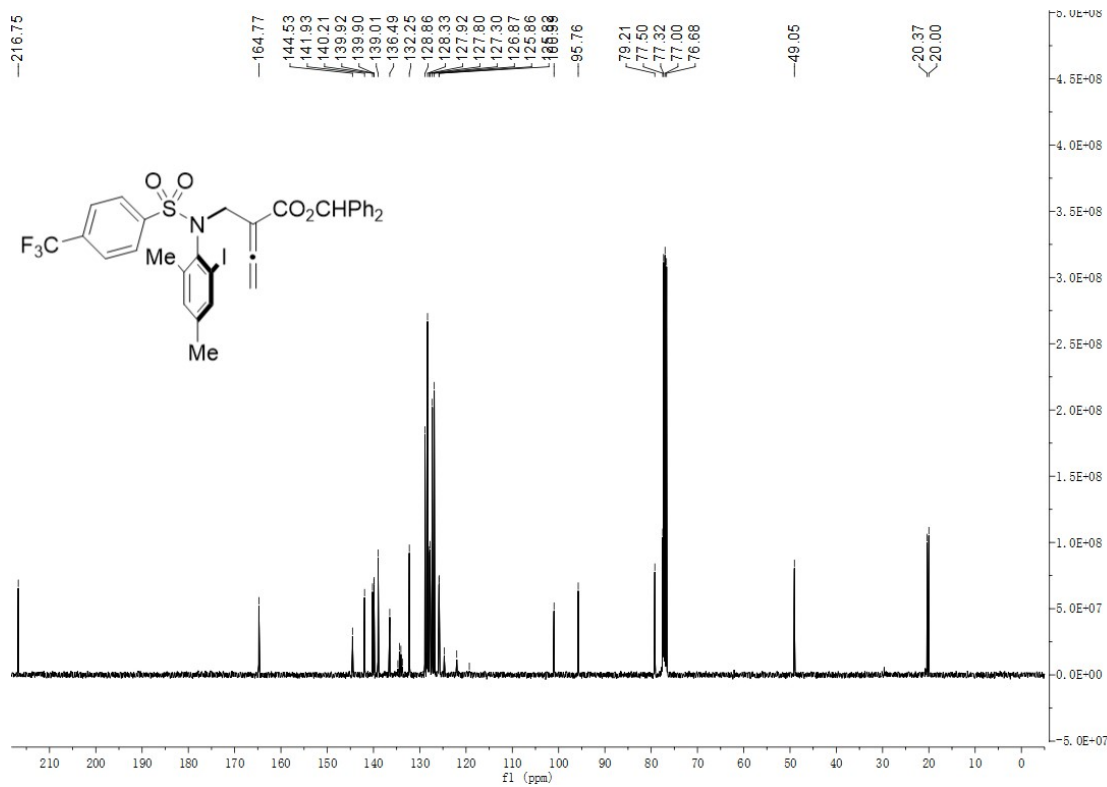

# Compound 3t

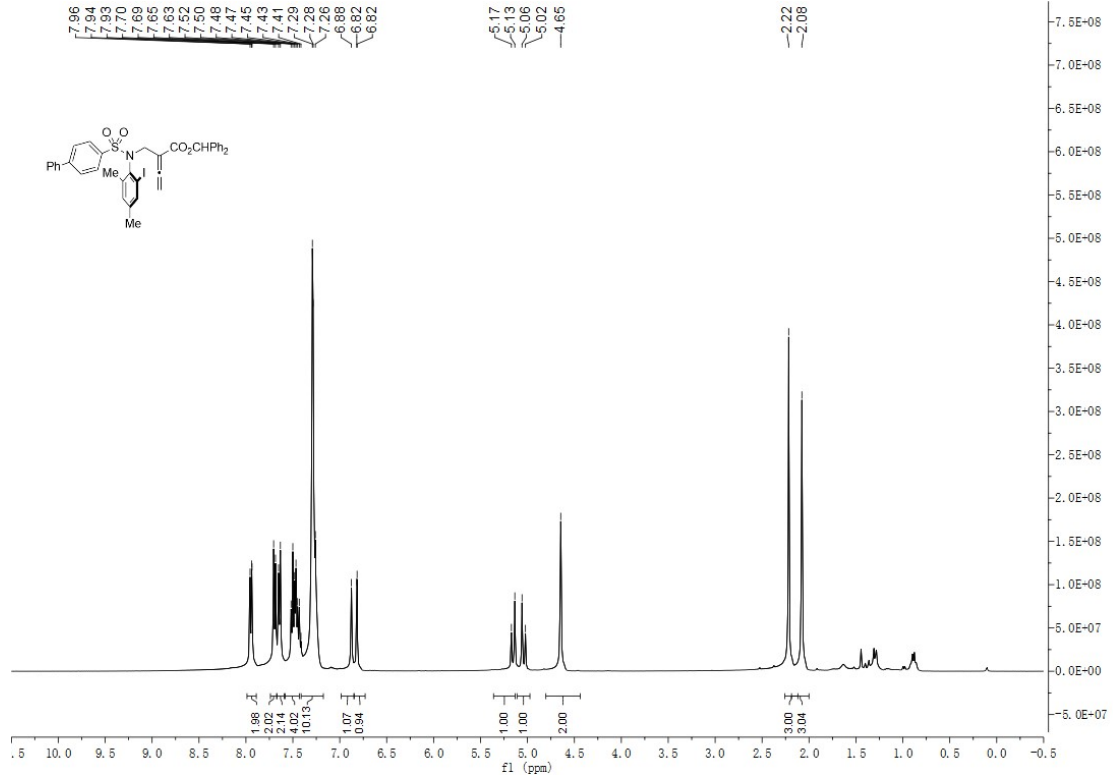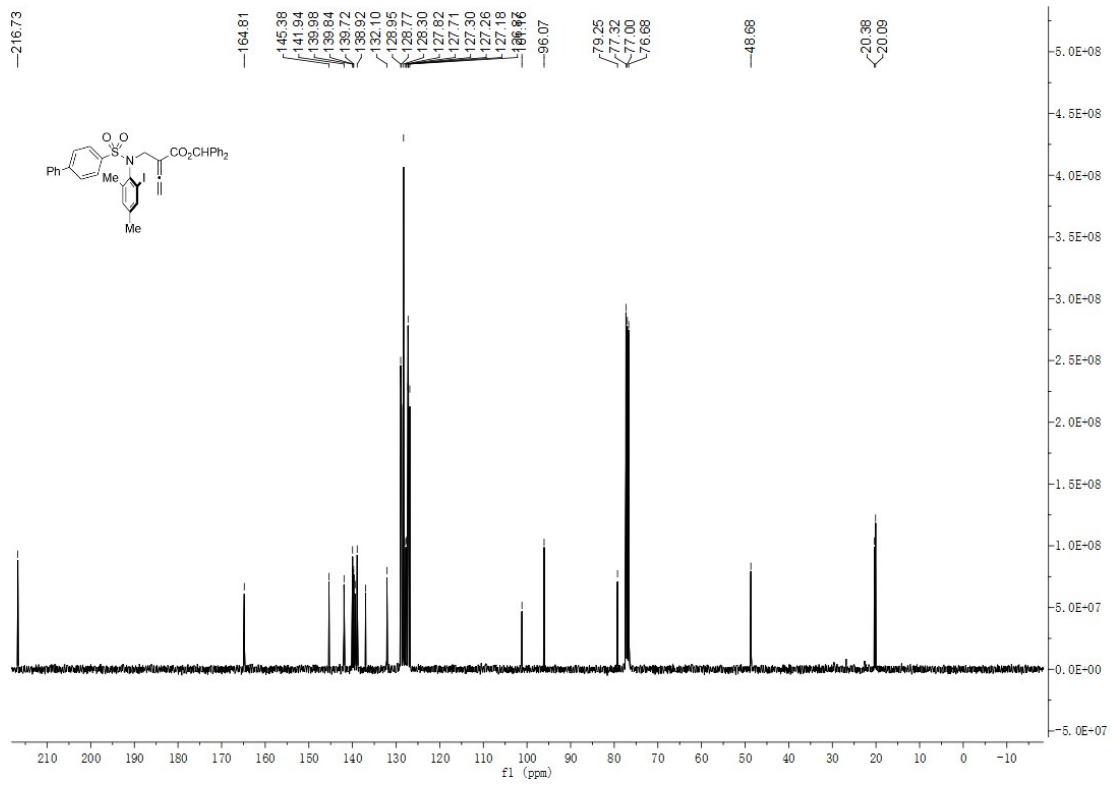

# Compound 3u

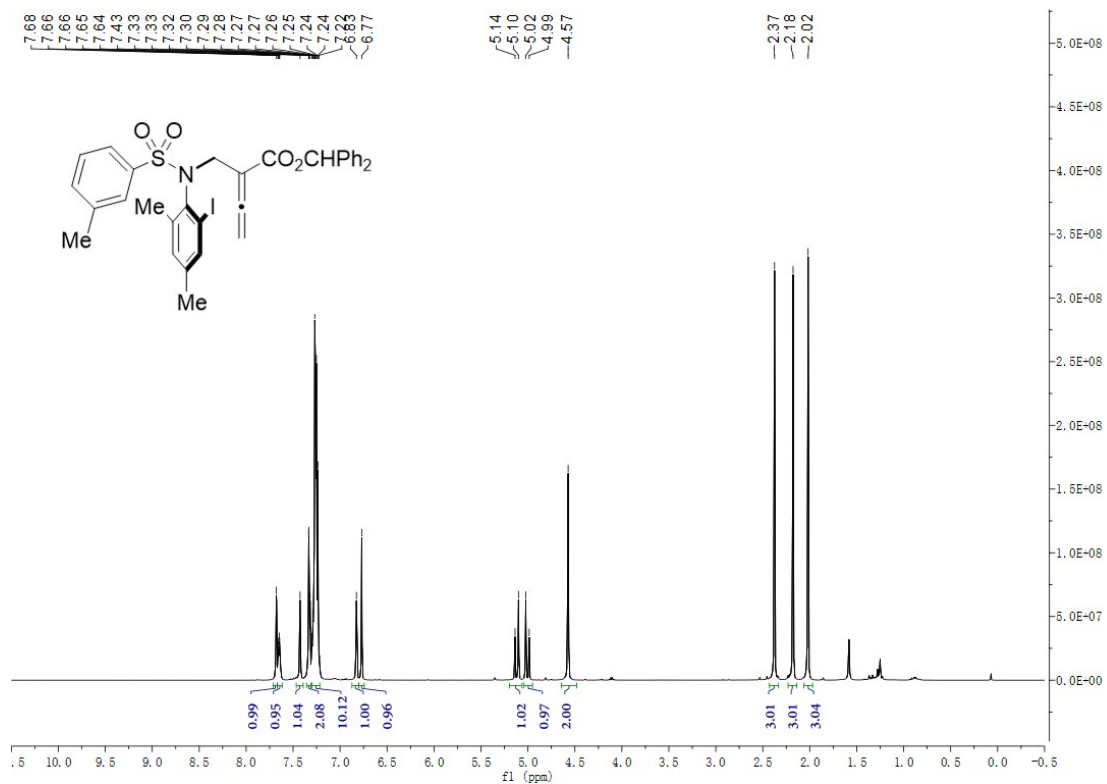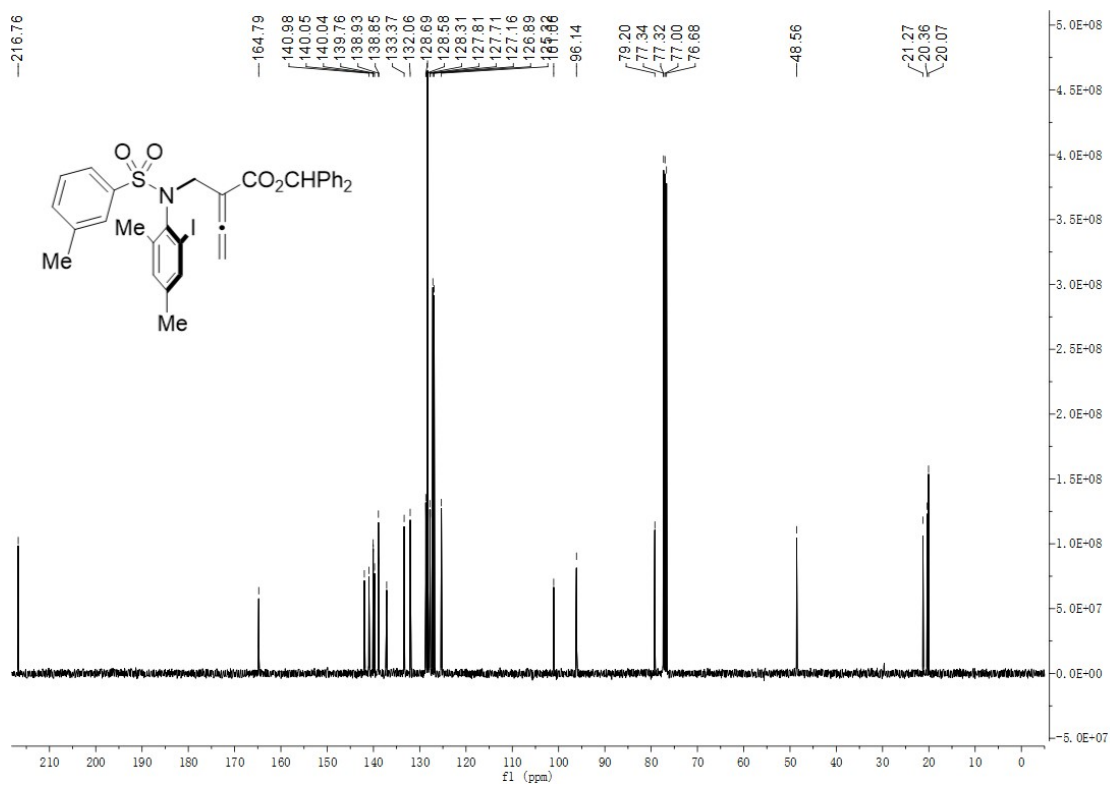



# Compound 3v

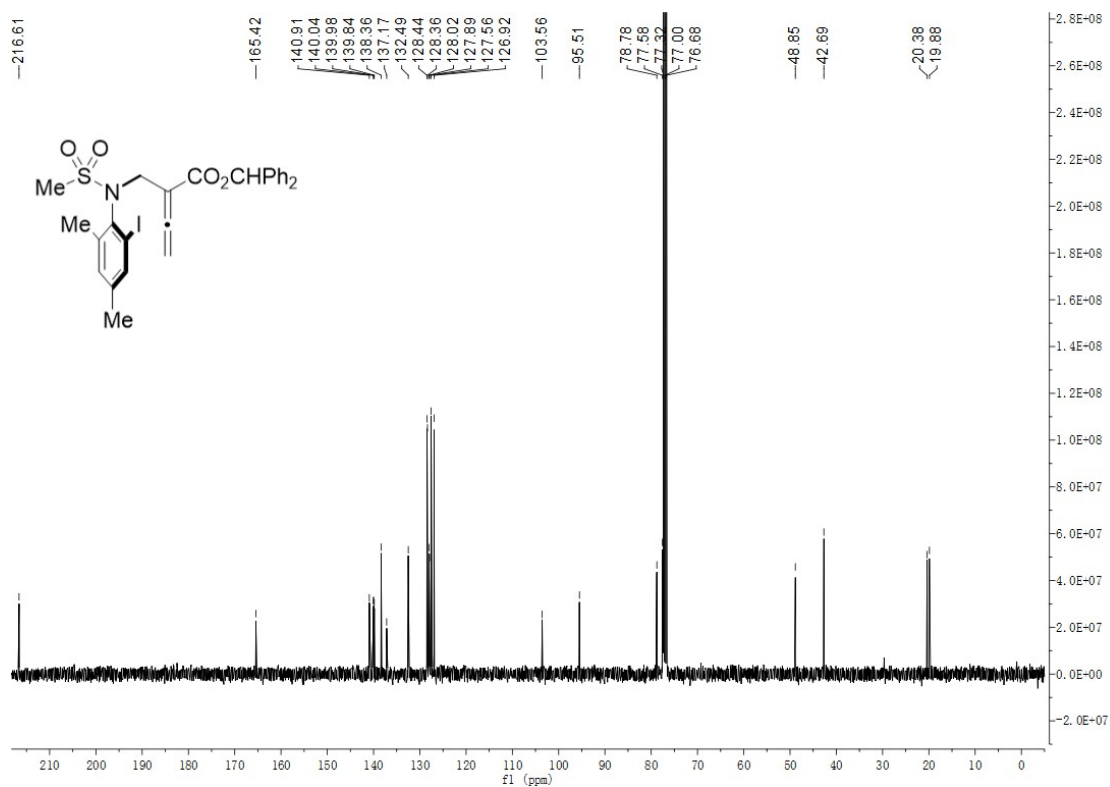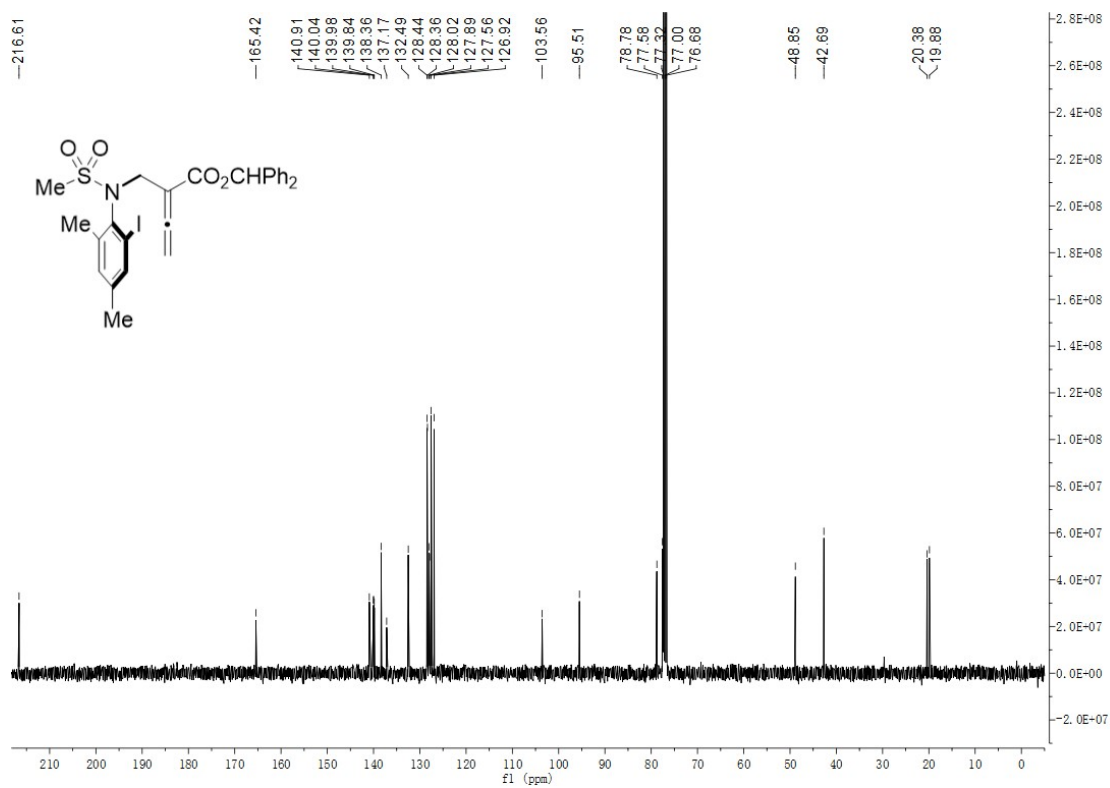

Compound 3w

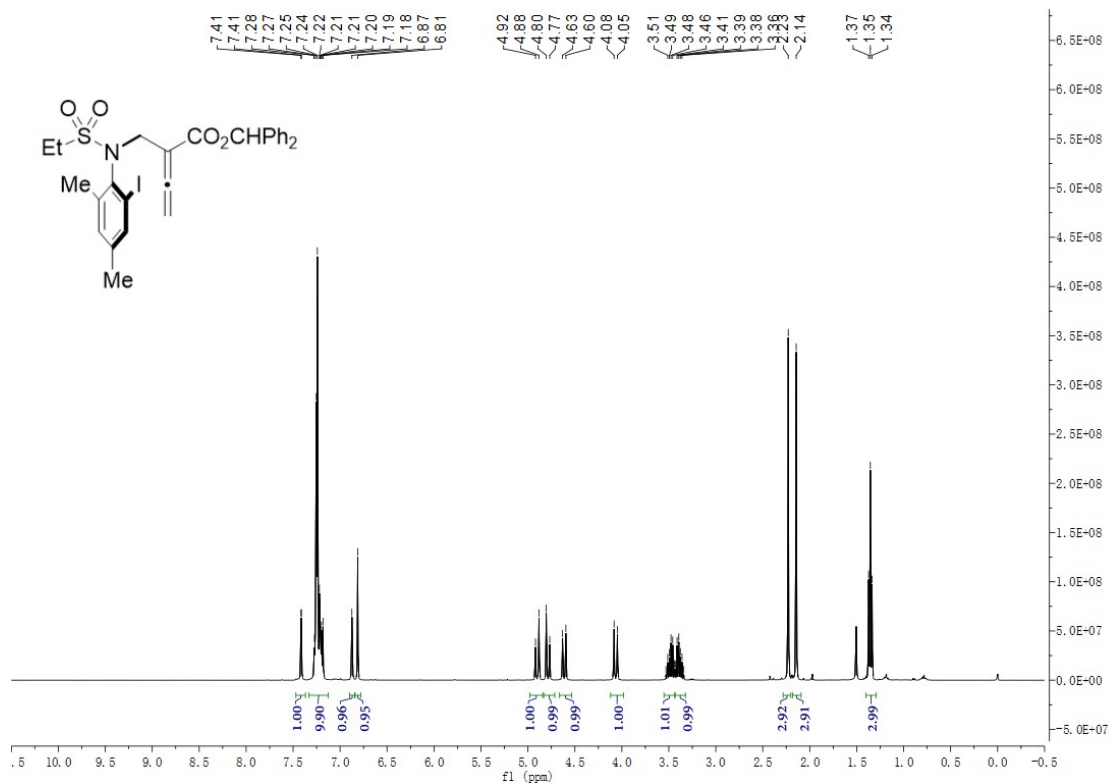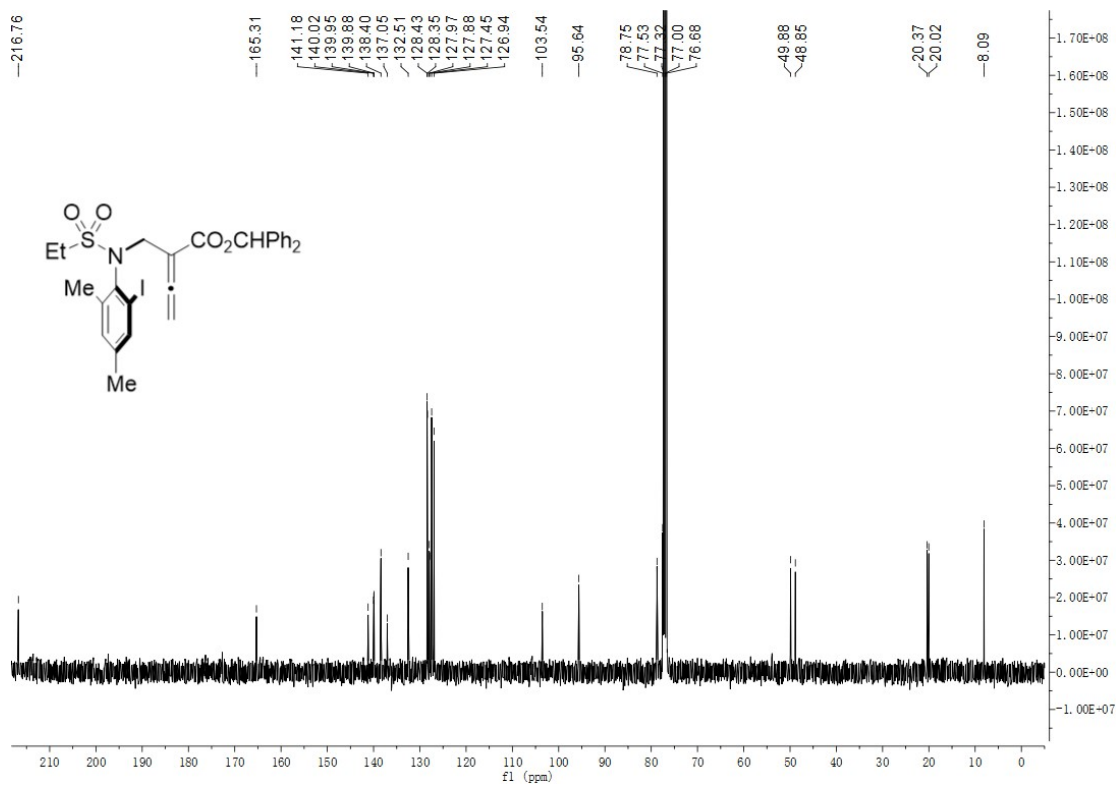

# Compound 3x

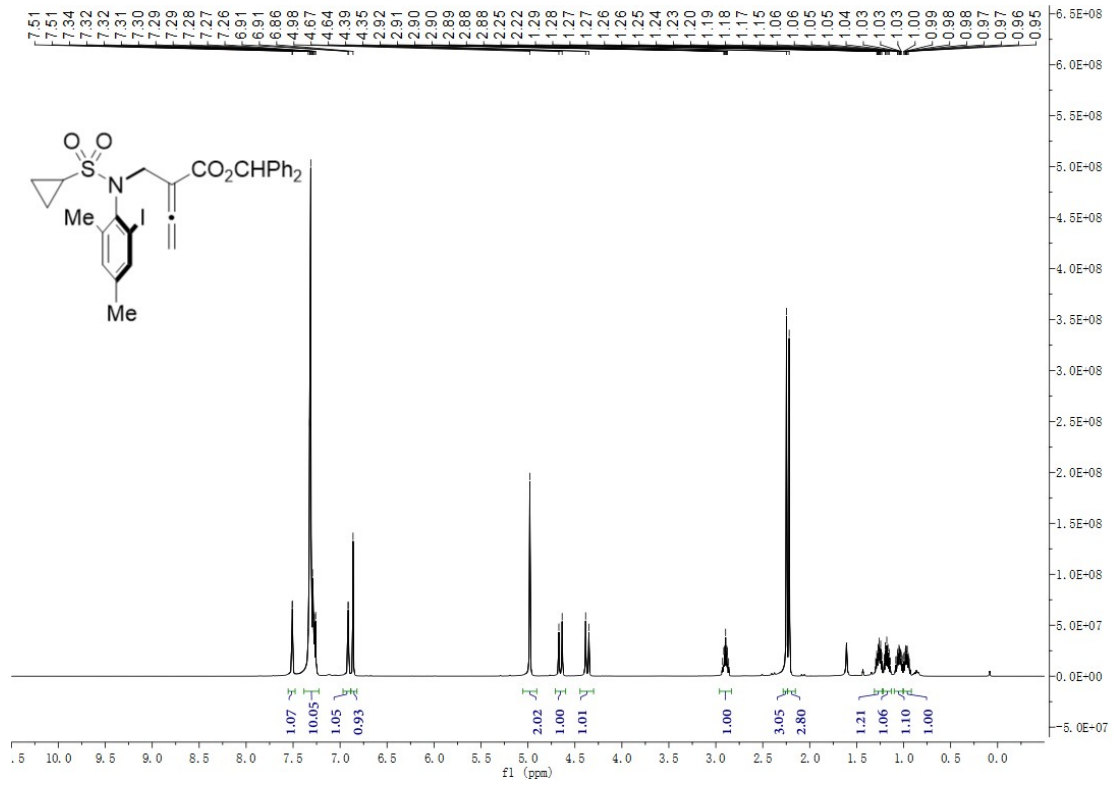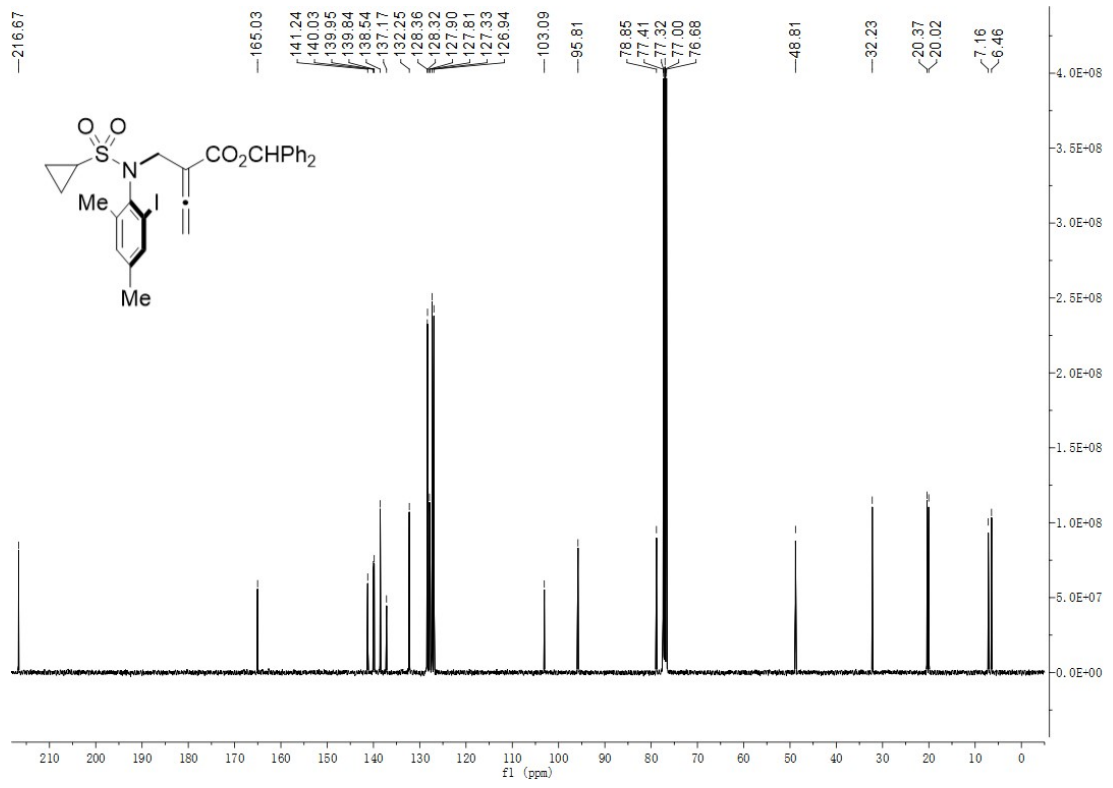

Compound 5a

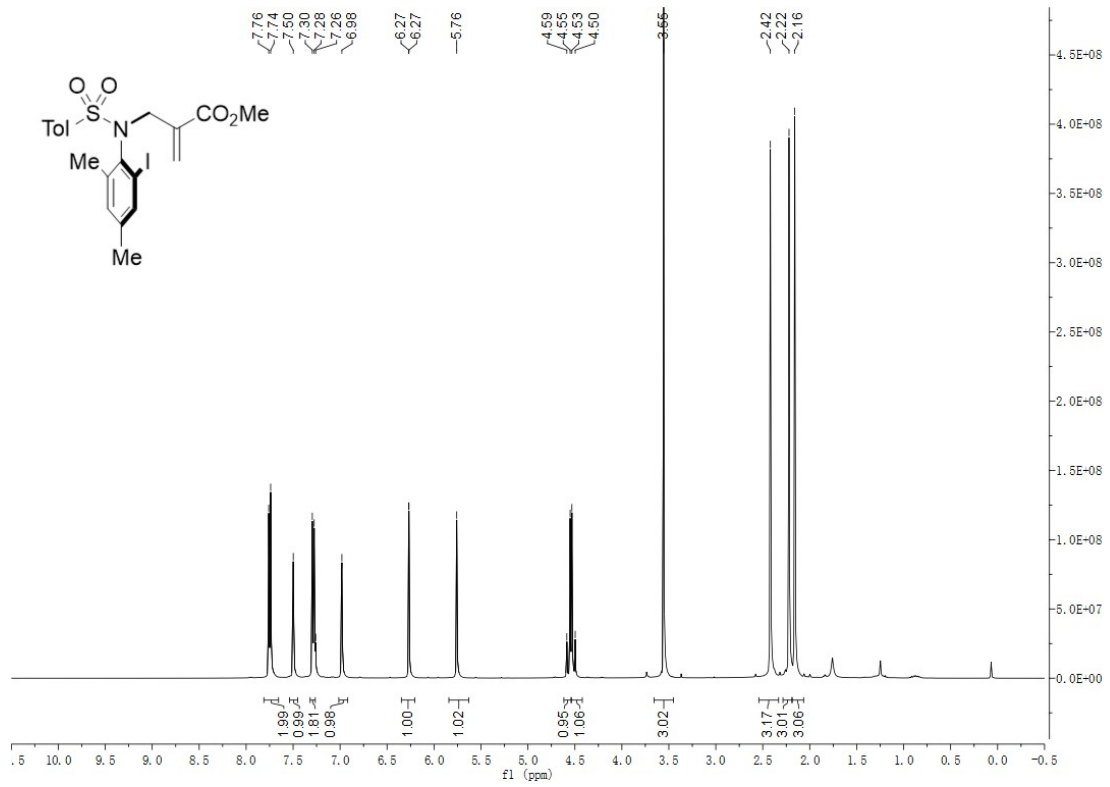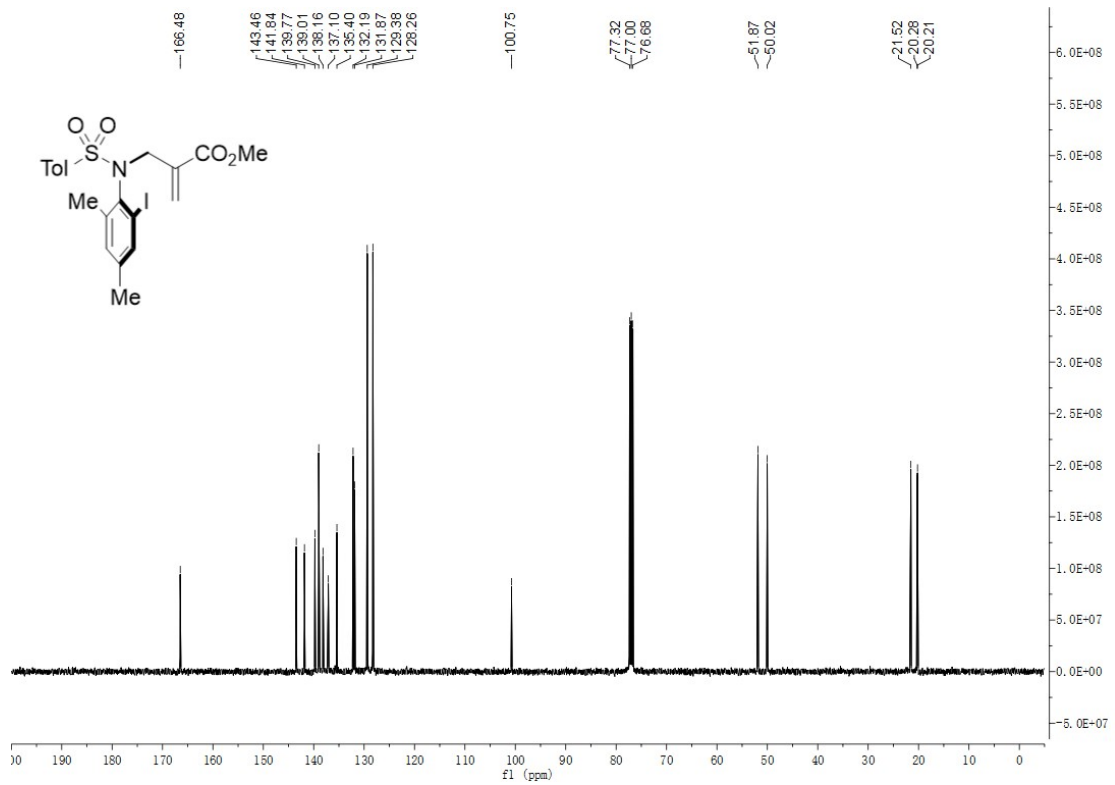

Compound **5b**

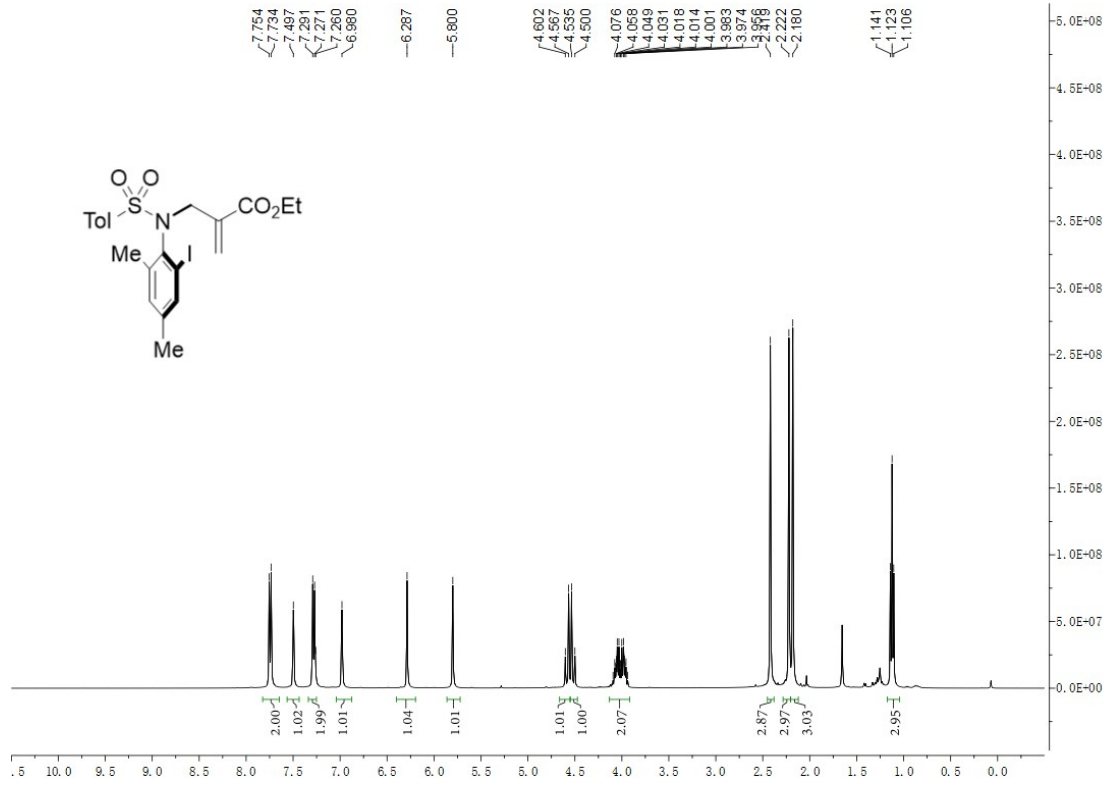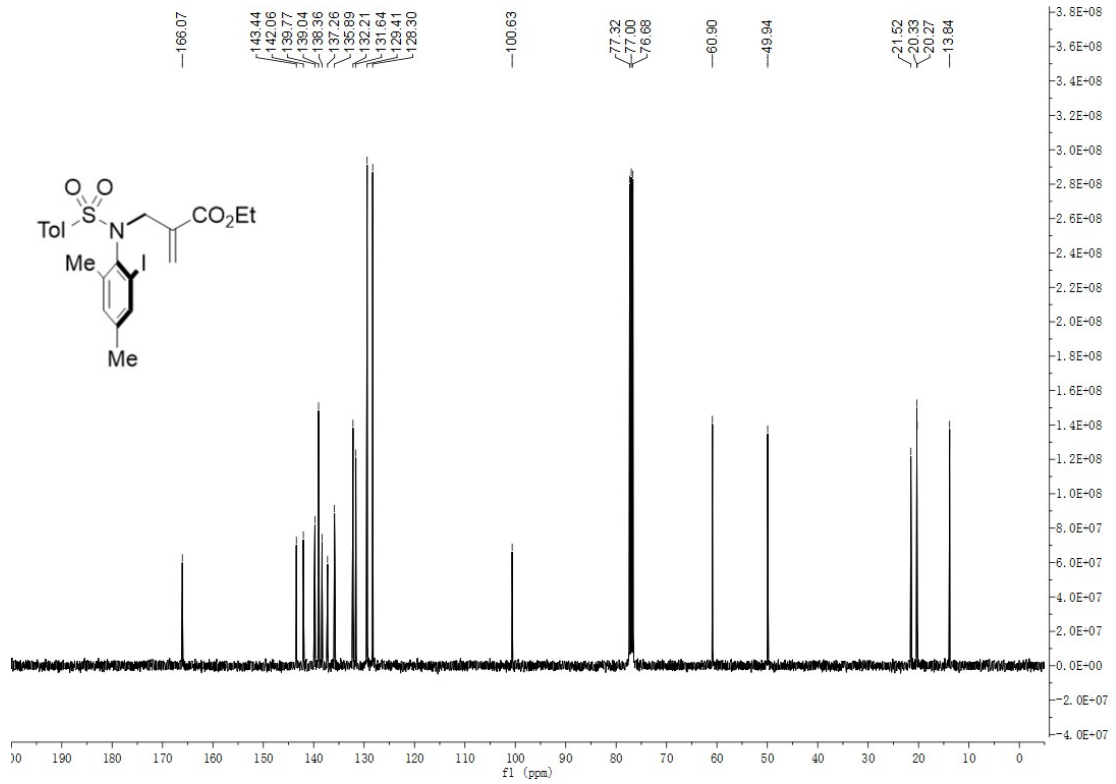

Compound 5c

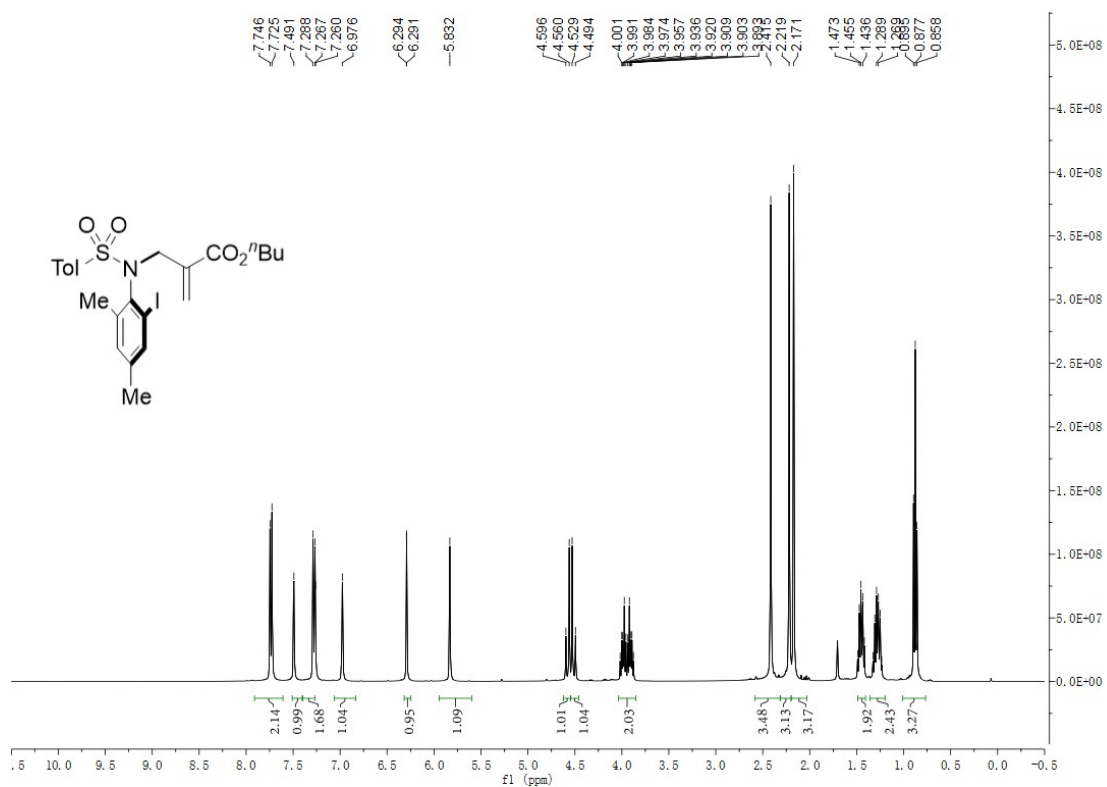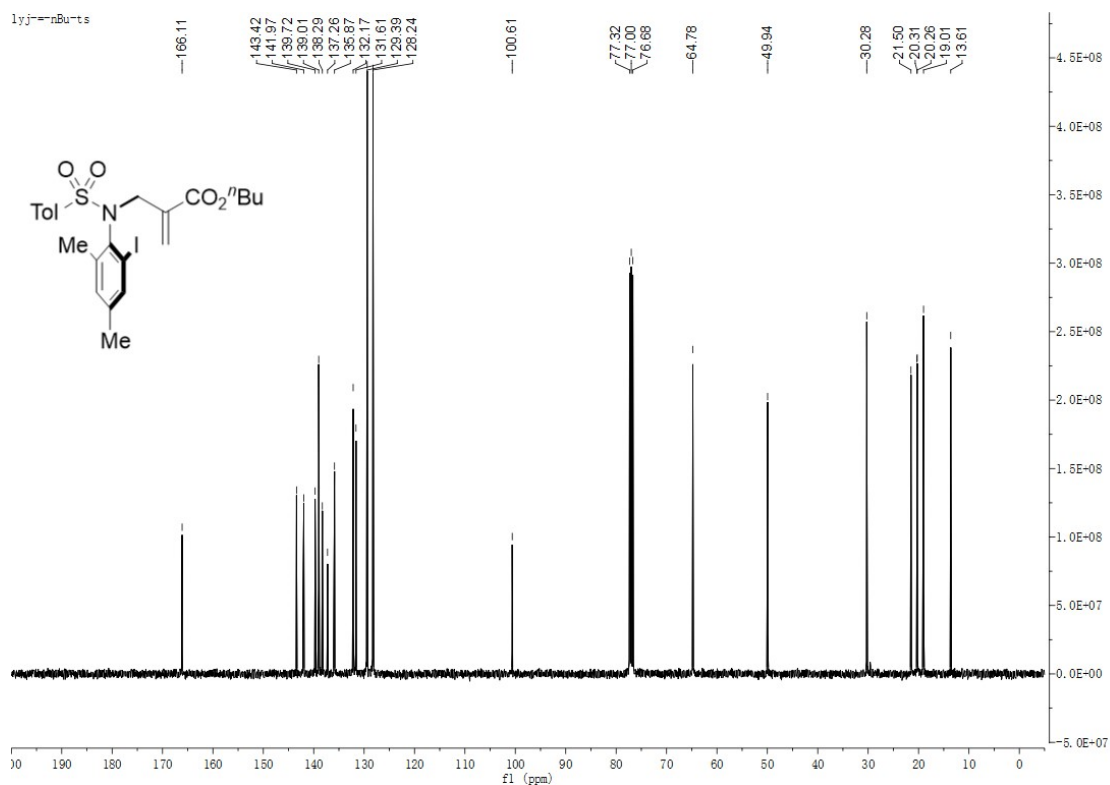

Compound 5d

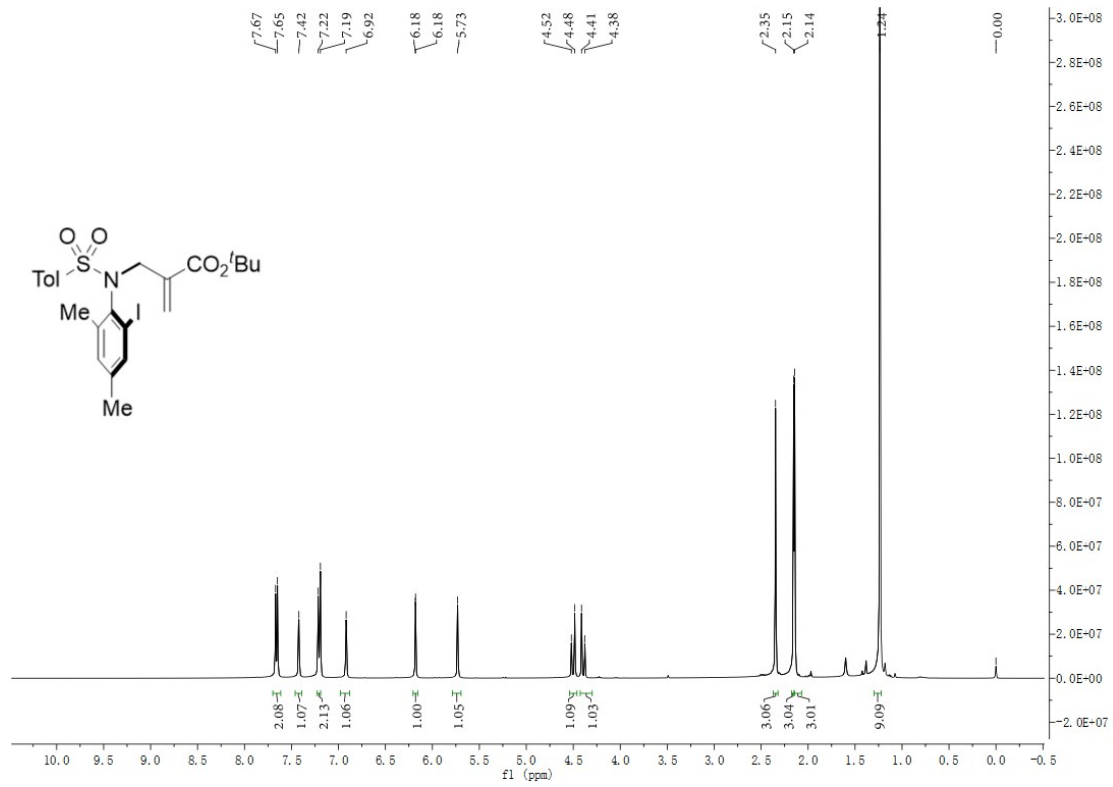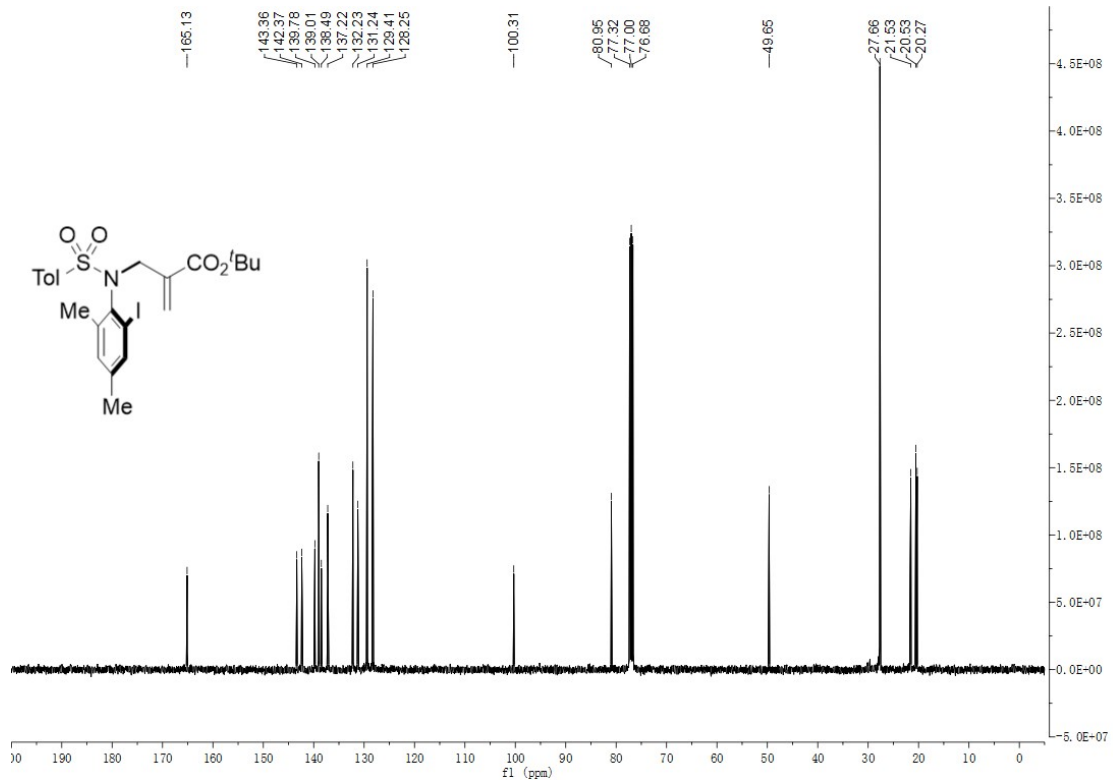

Compound 5e

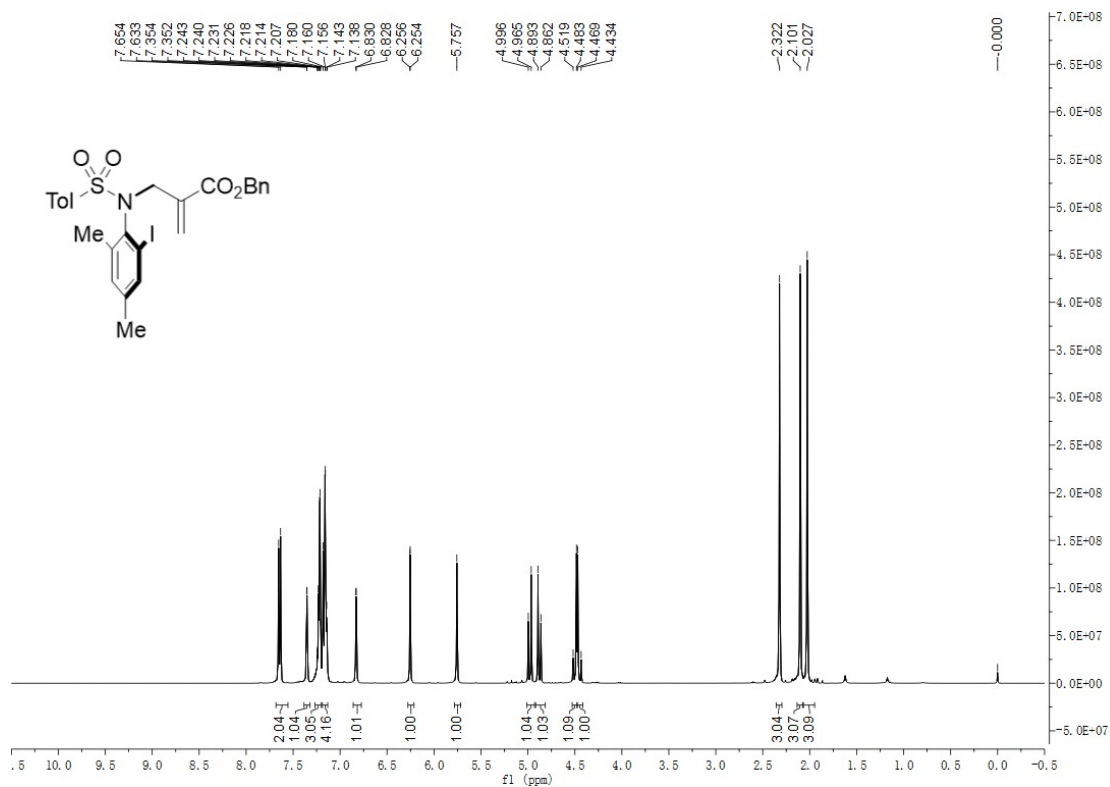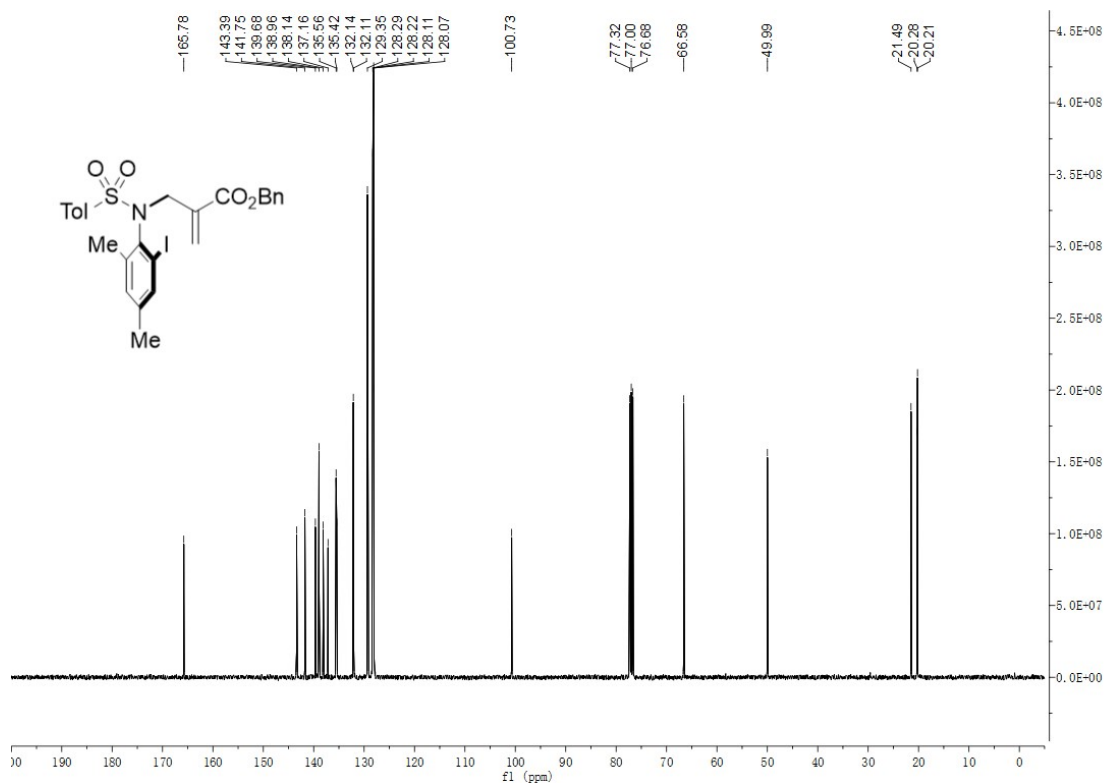



Compound **5f**

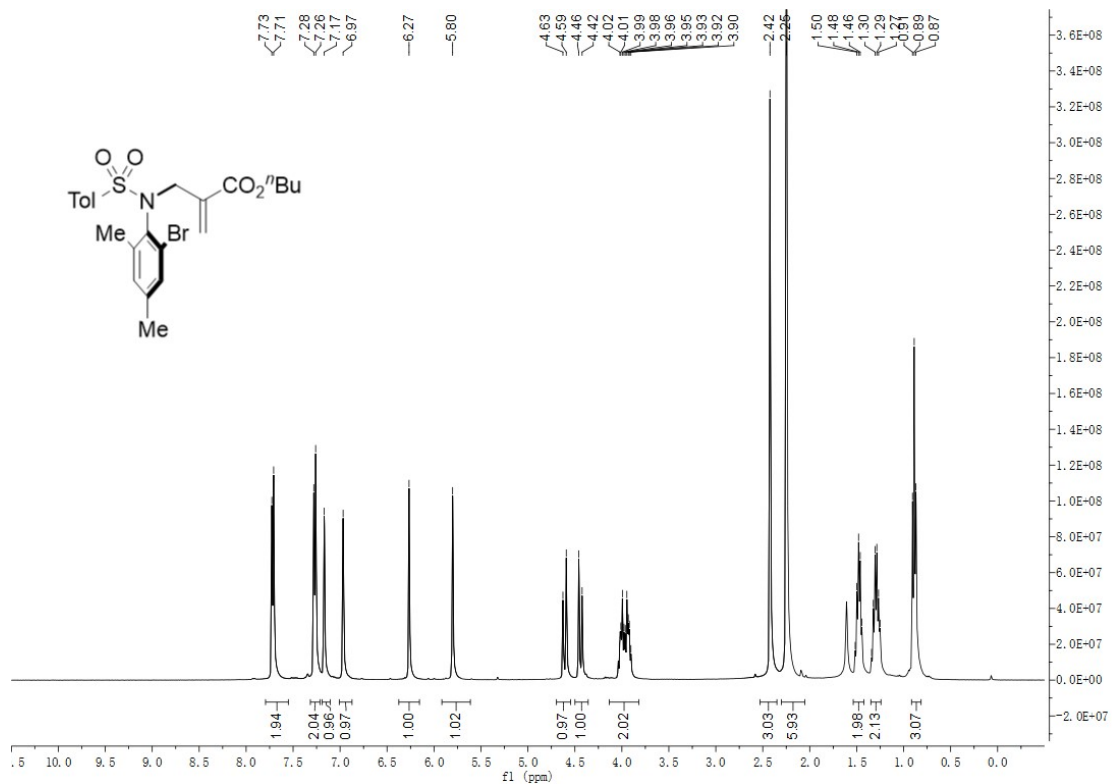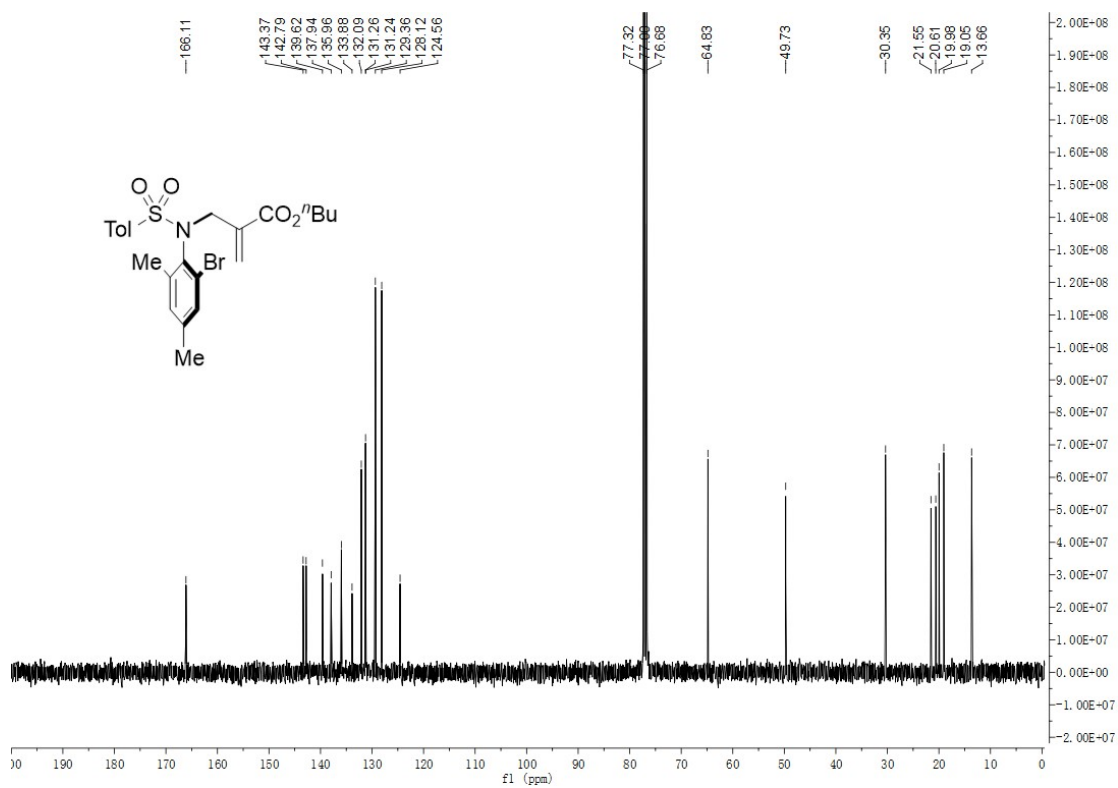

Compound 5g

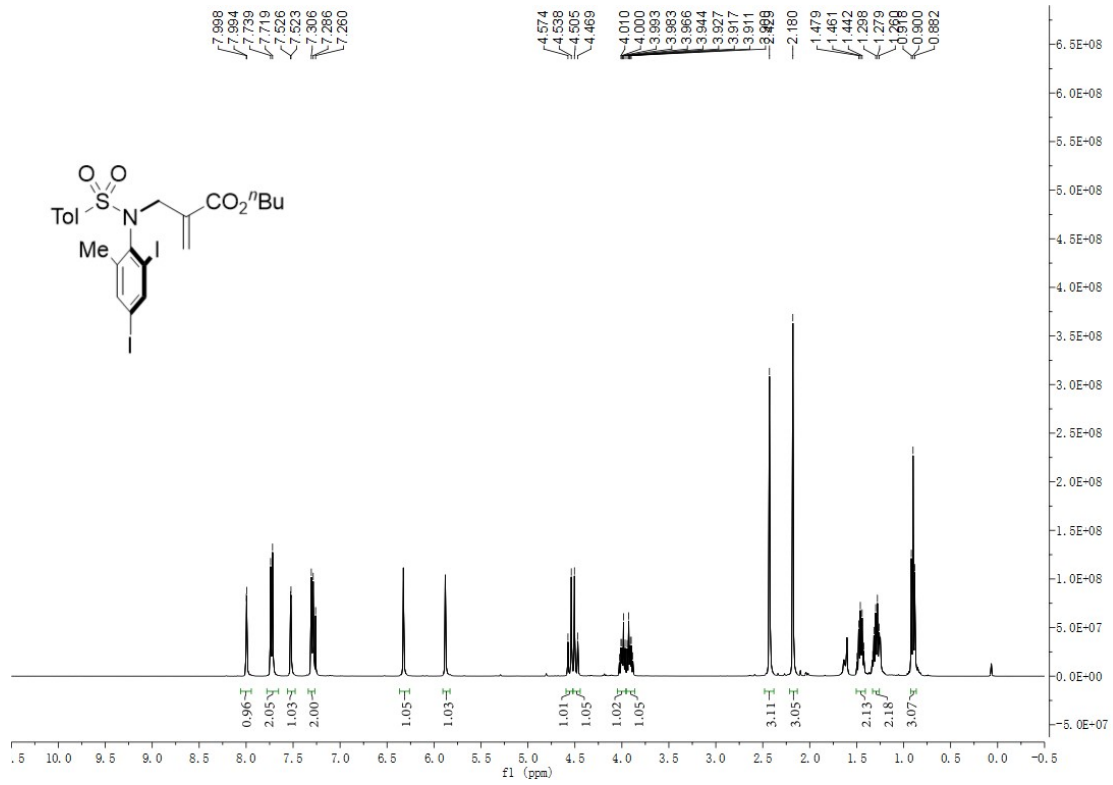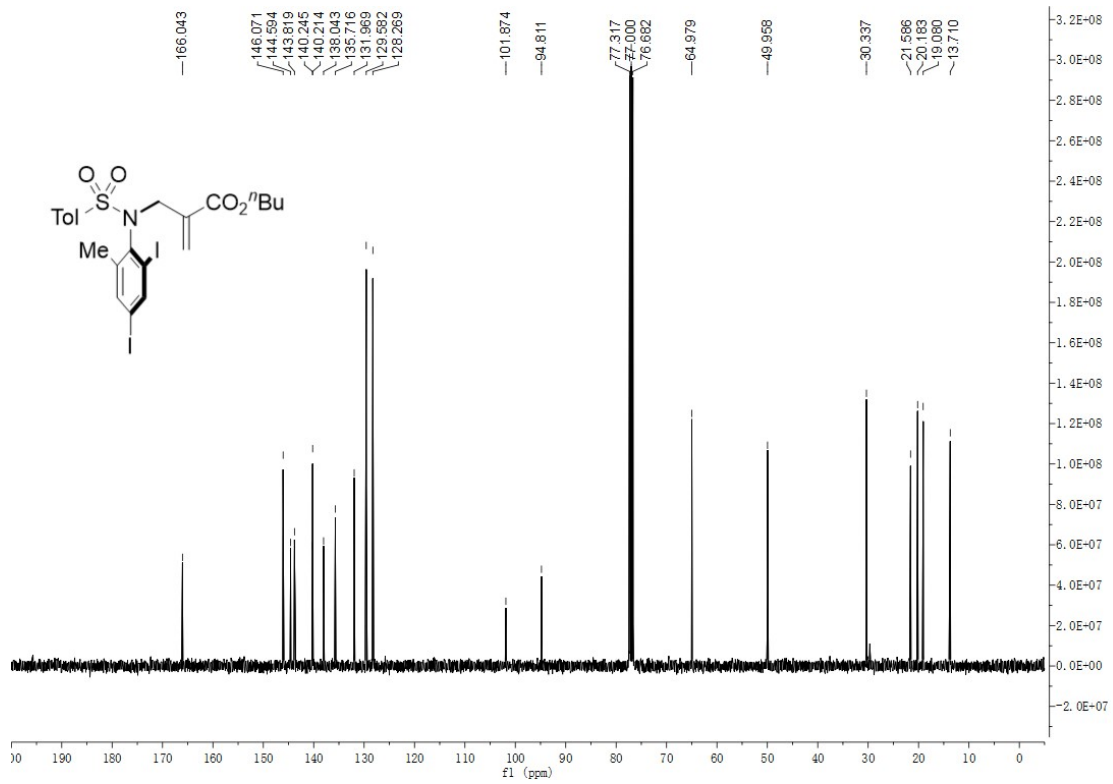

Compound 5h

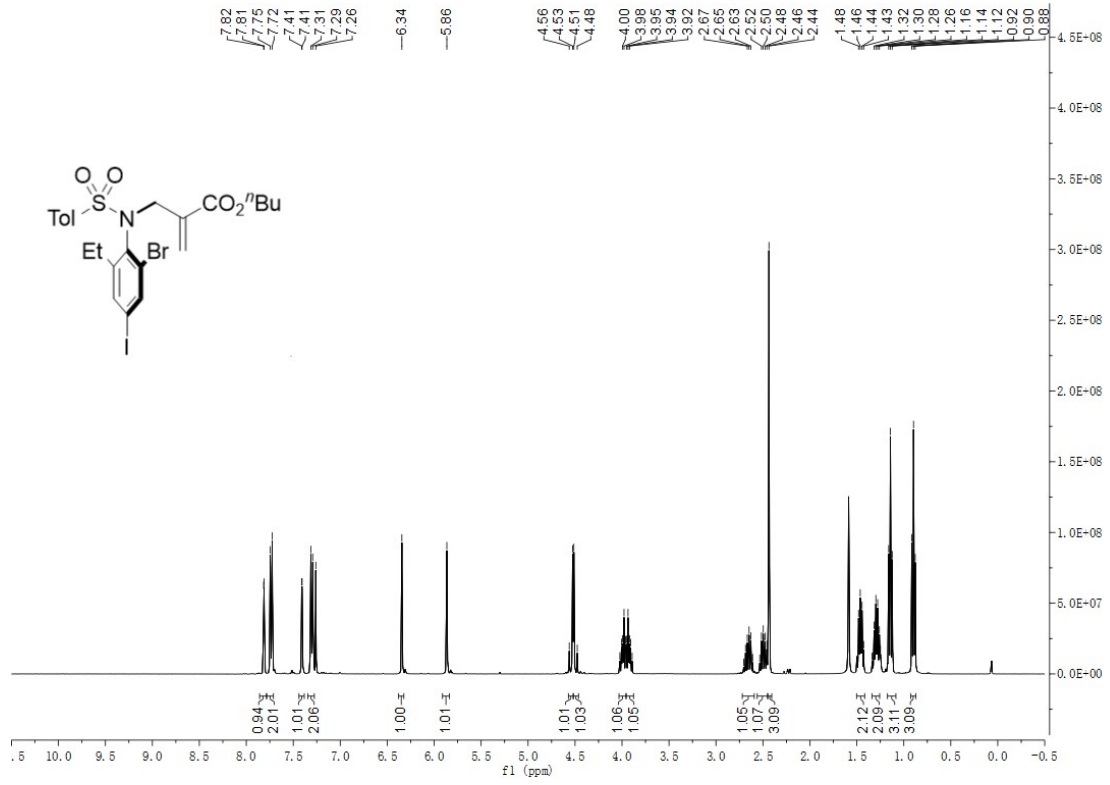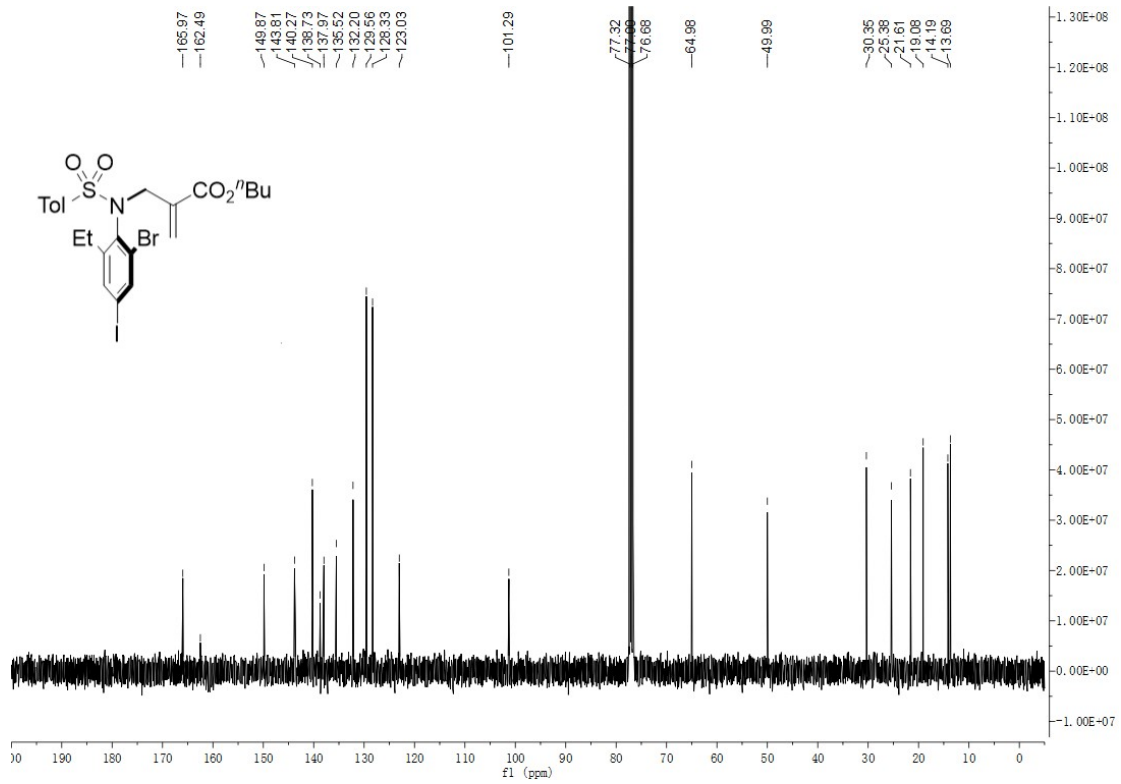

Compound **5i**

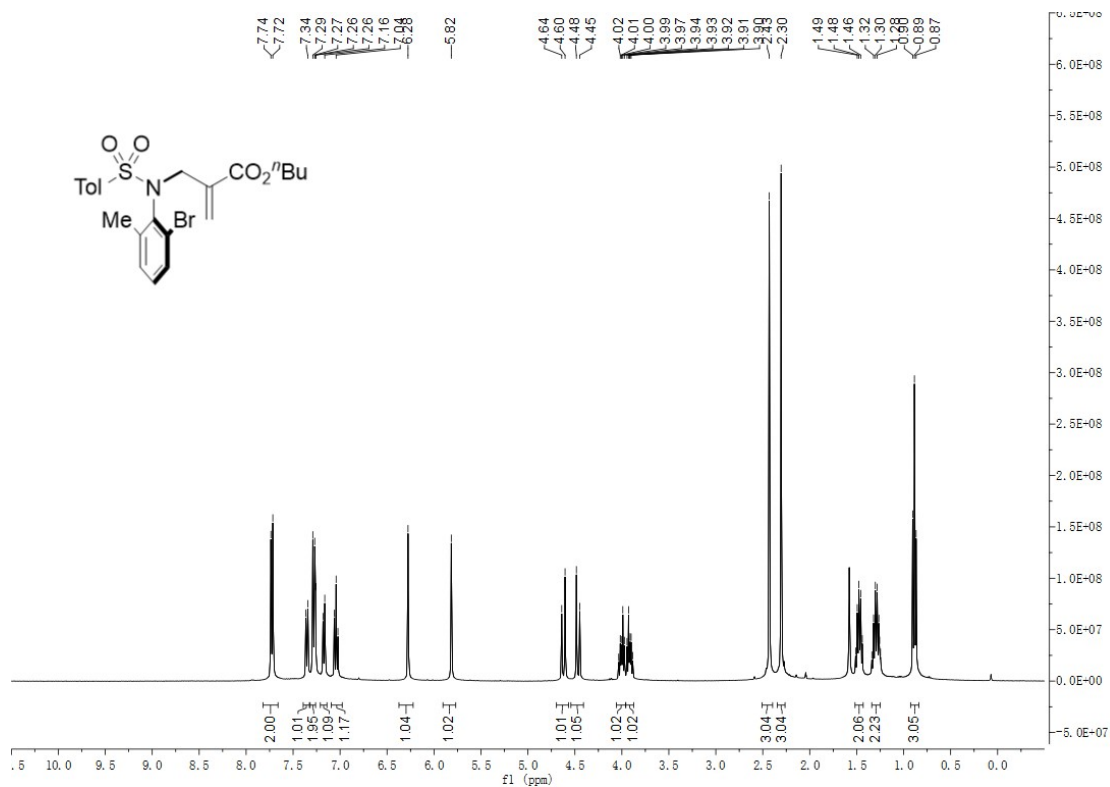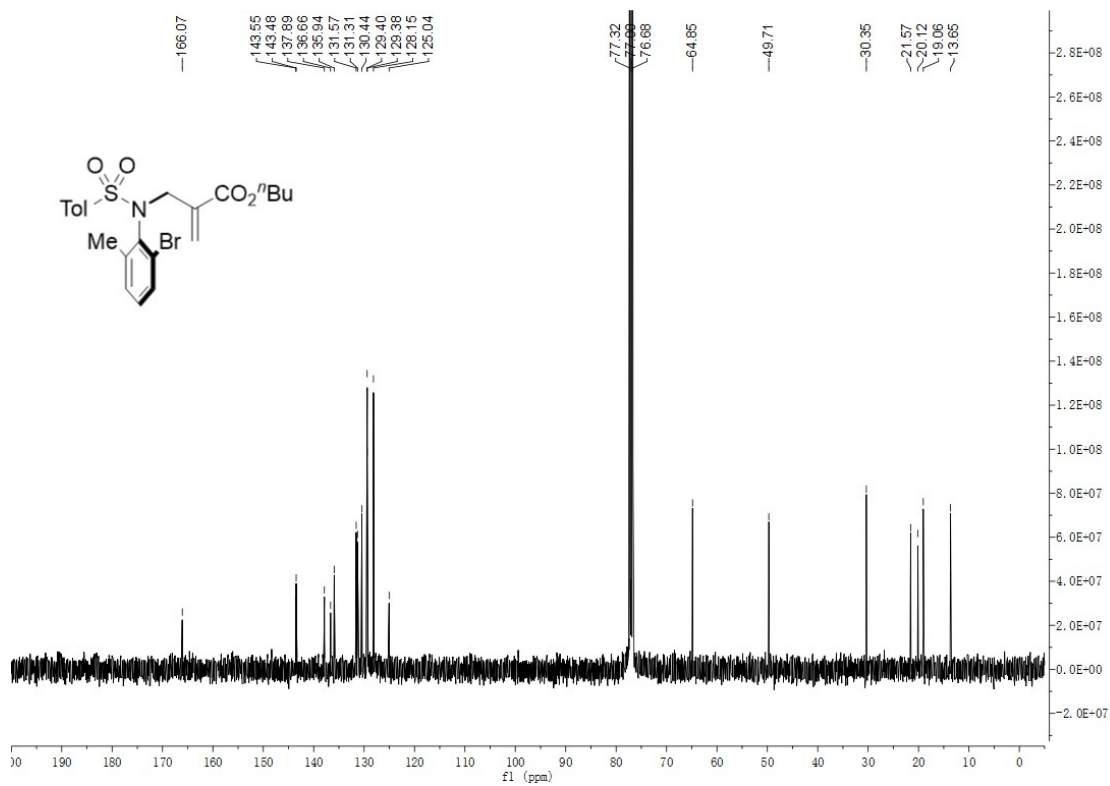

Compound 5j

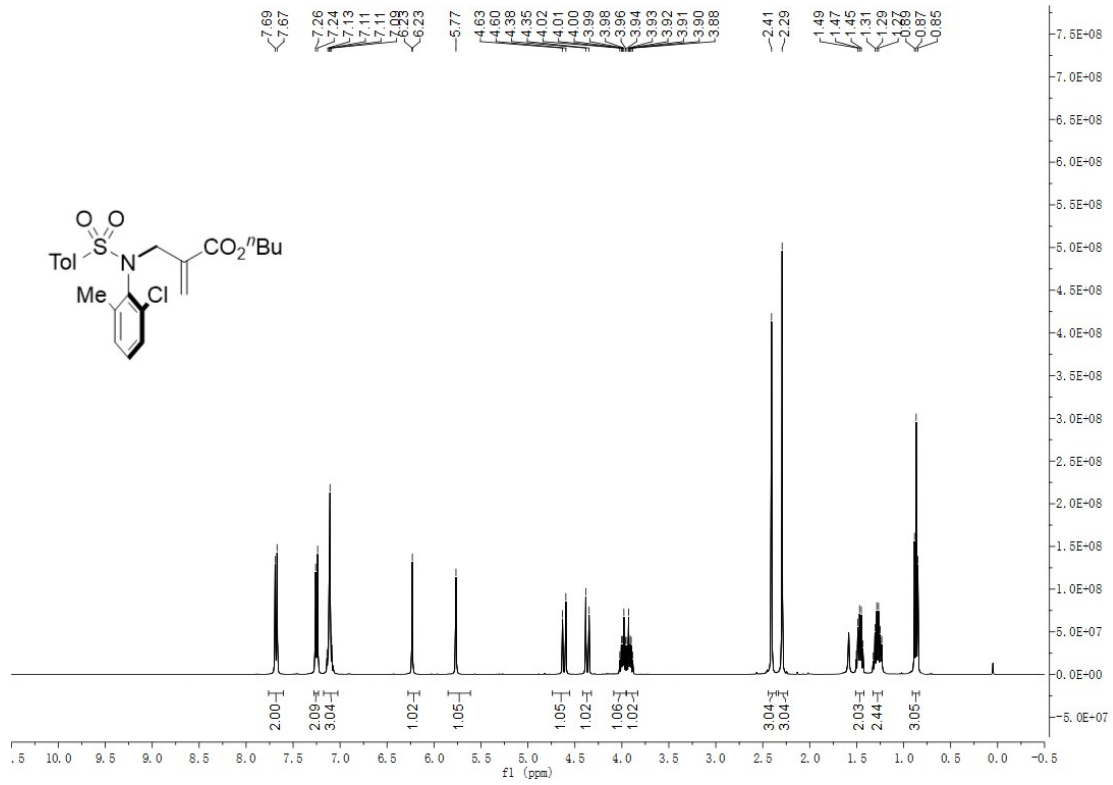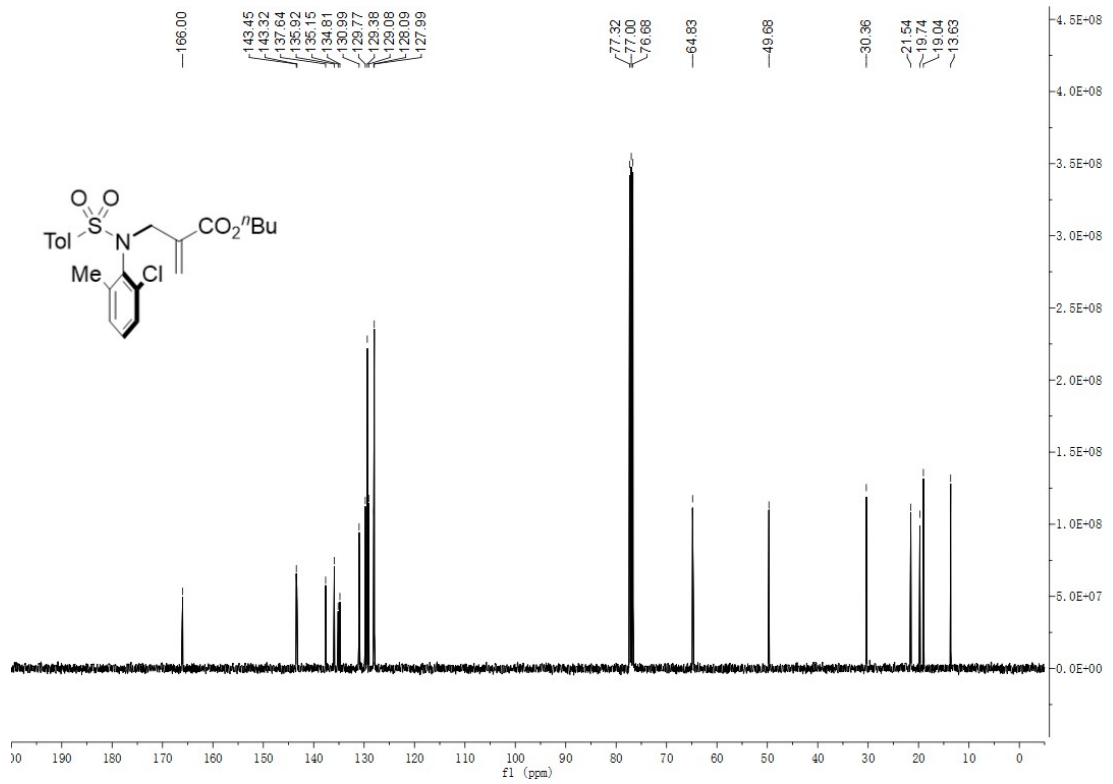

Compound 5k

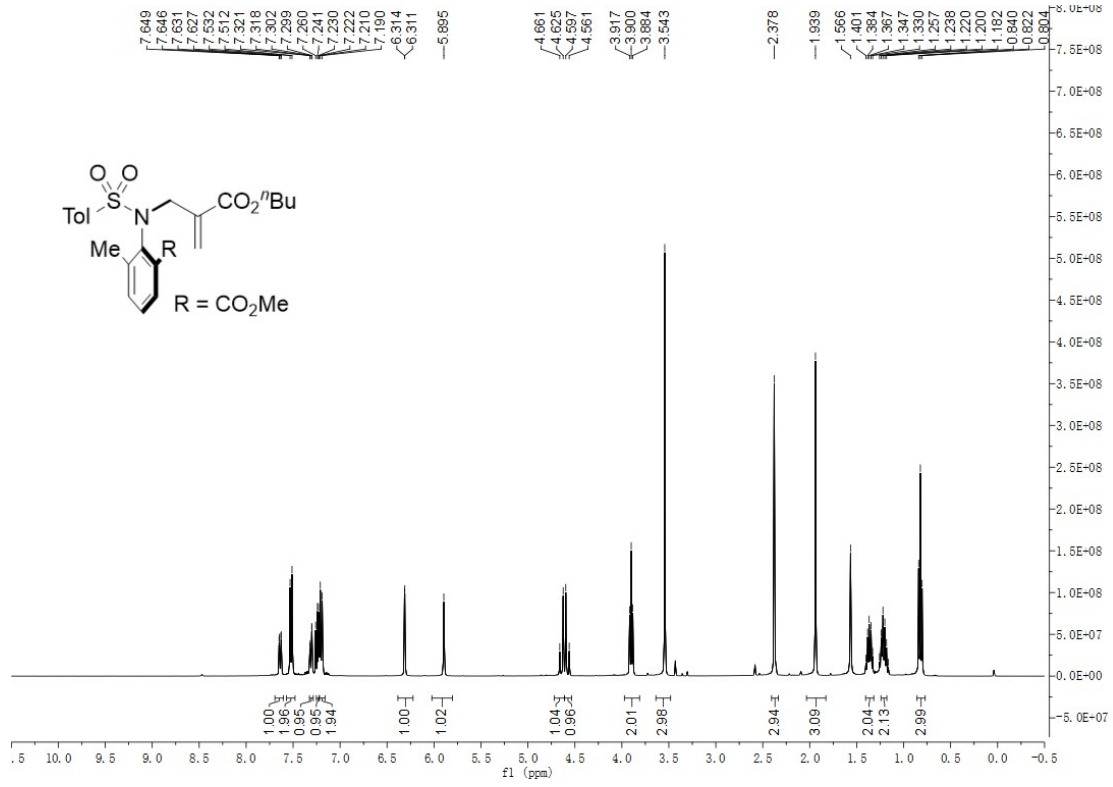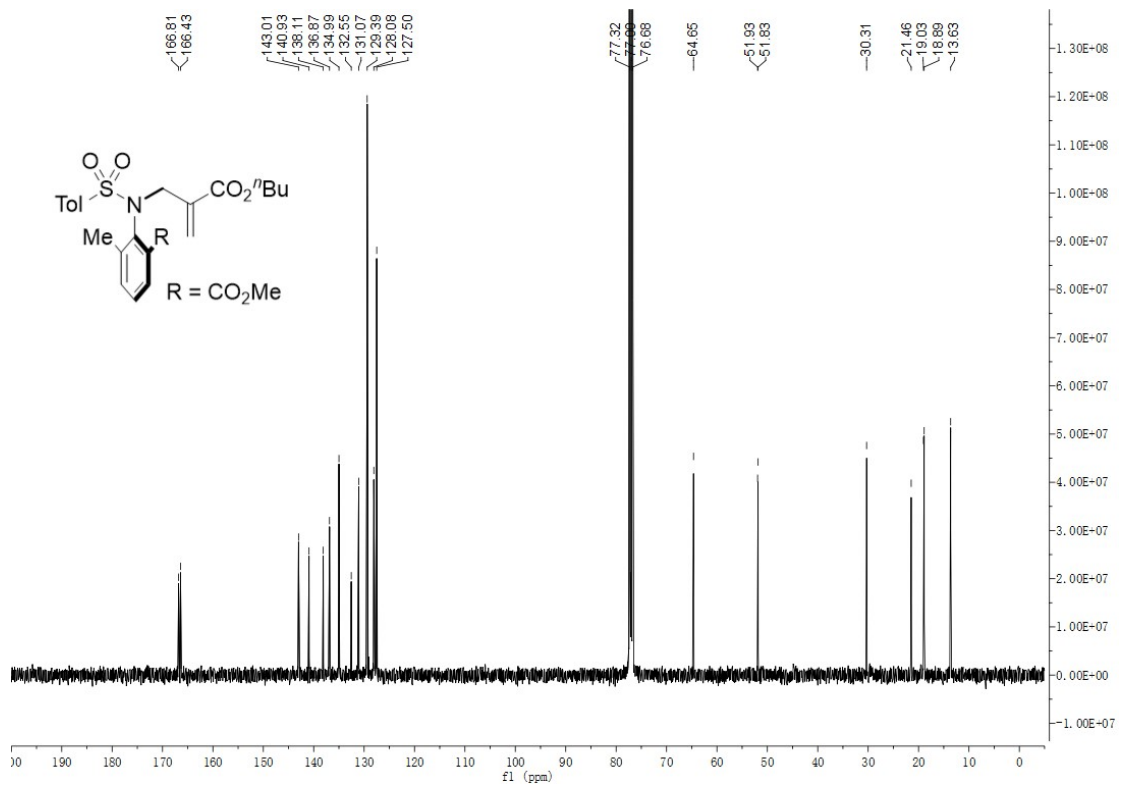

Compound 51

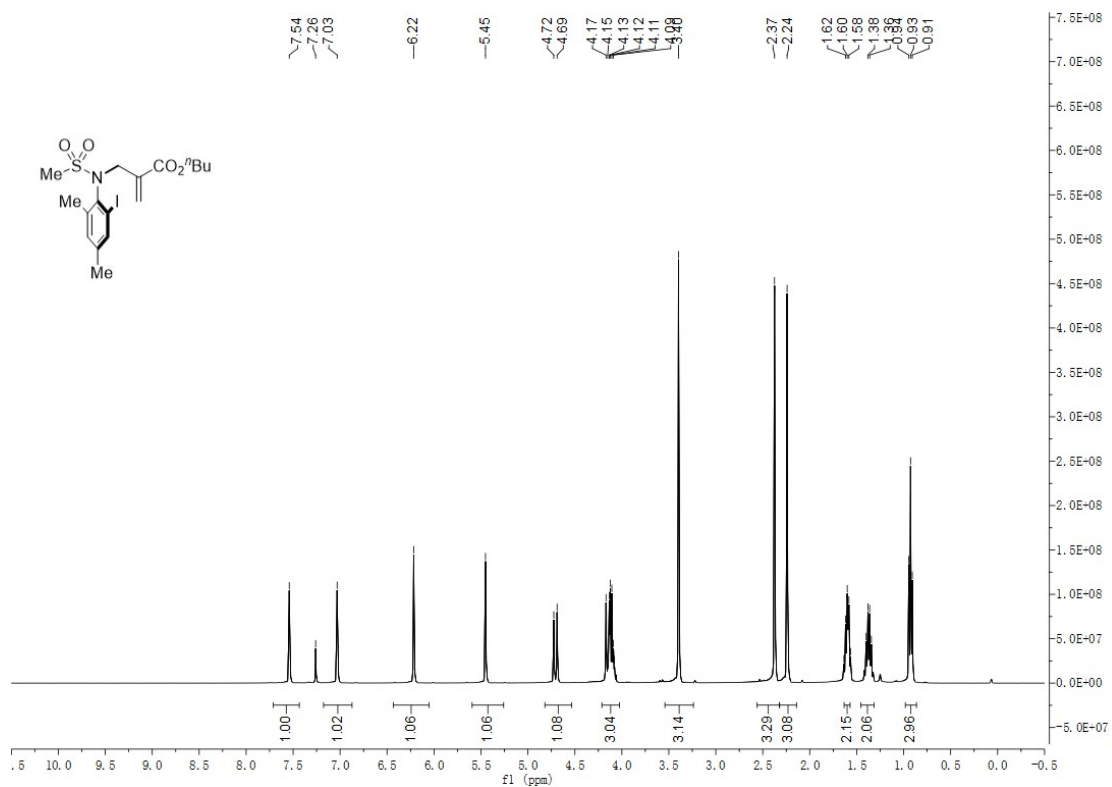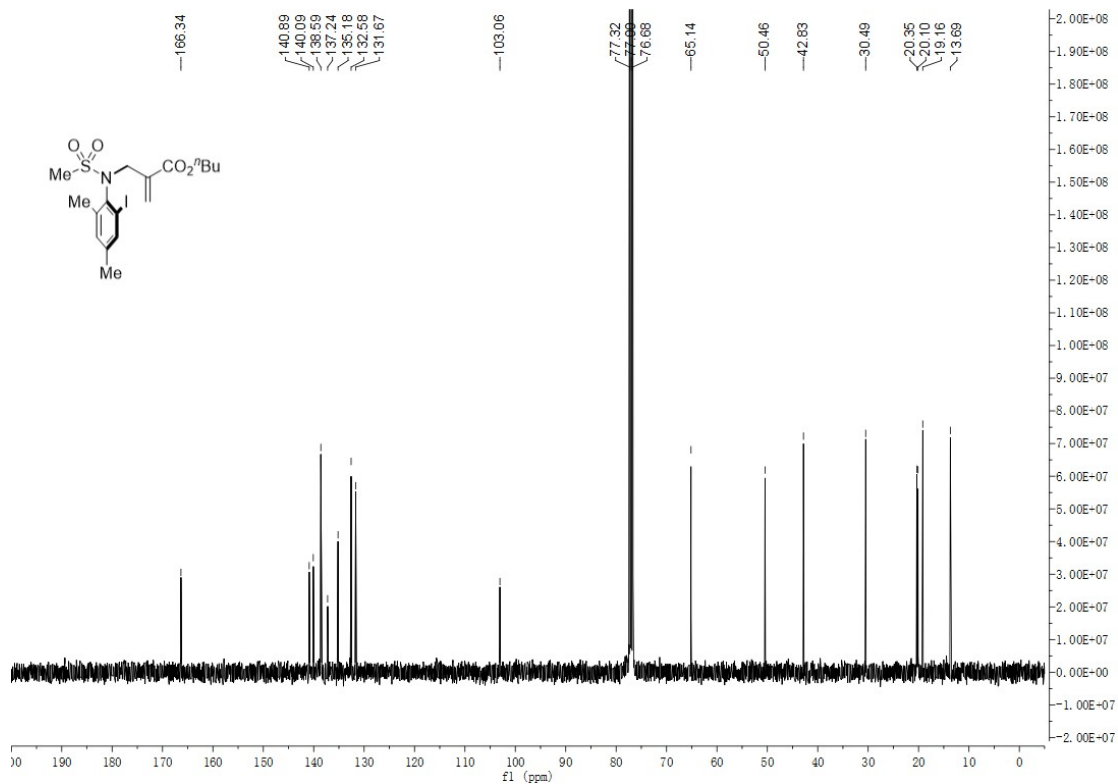

Compound **5m**

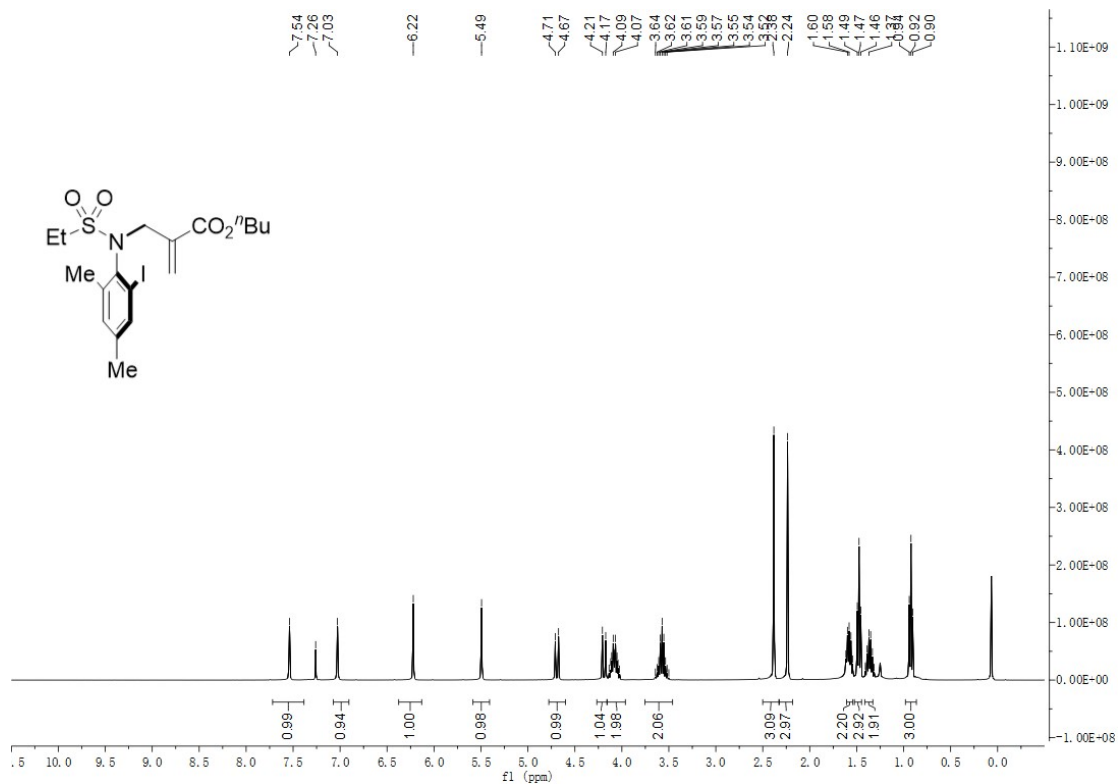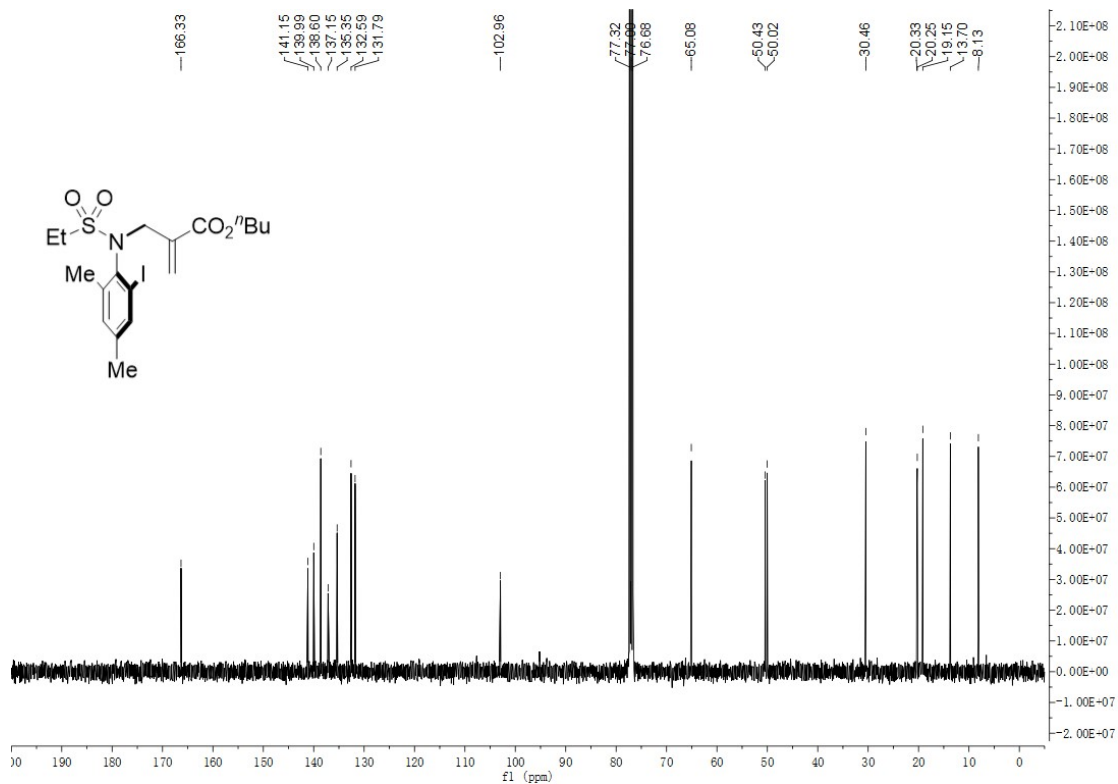



Compound 5n

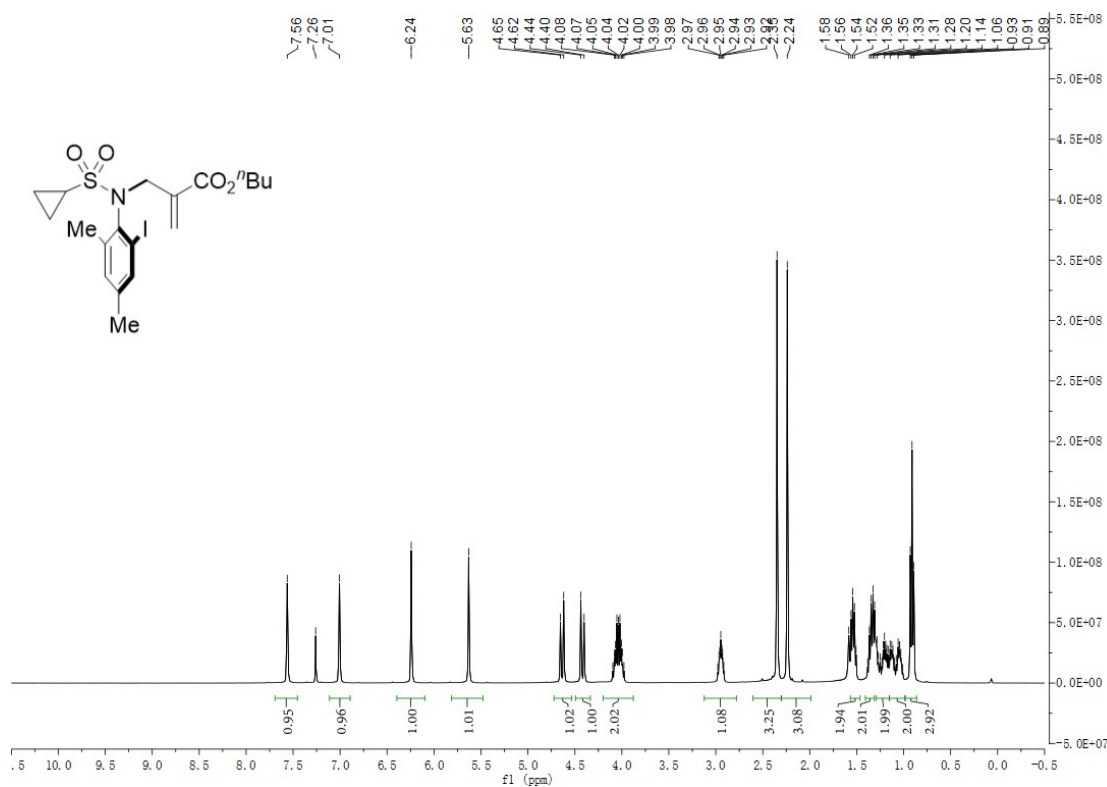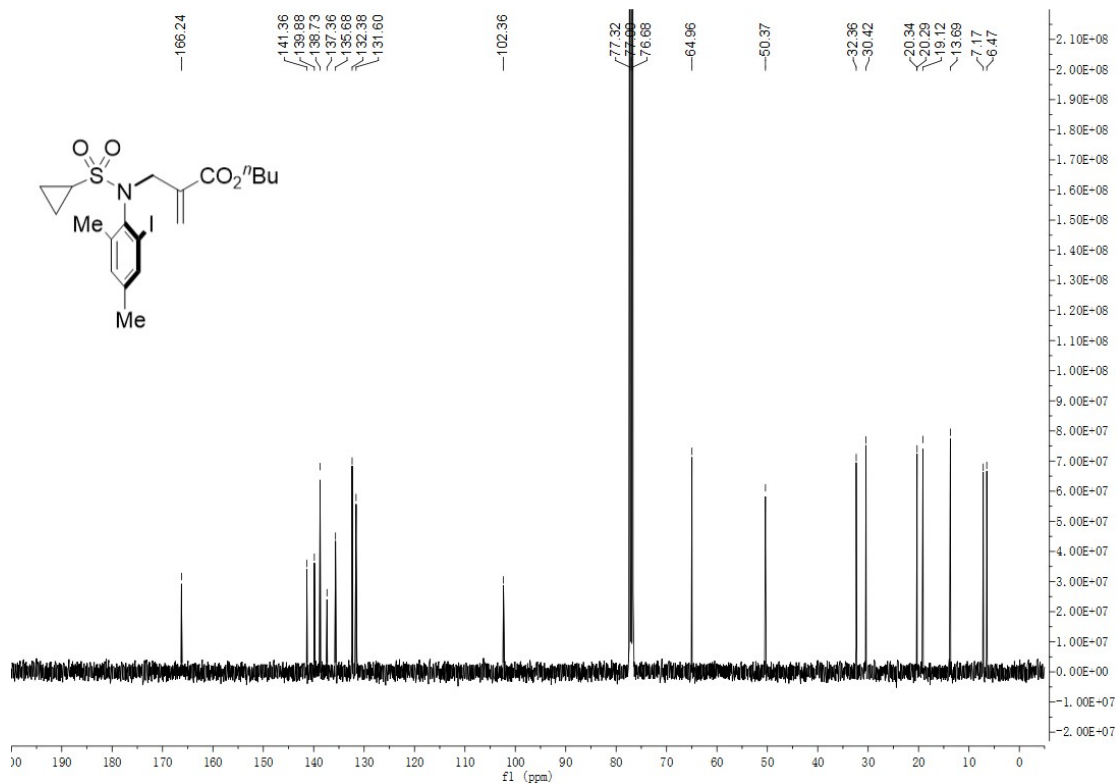

# Compound 5o

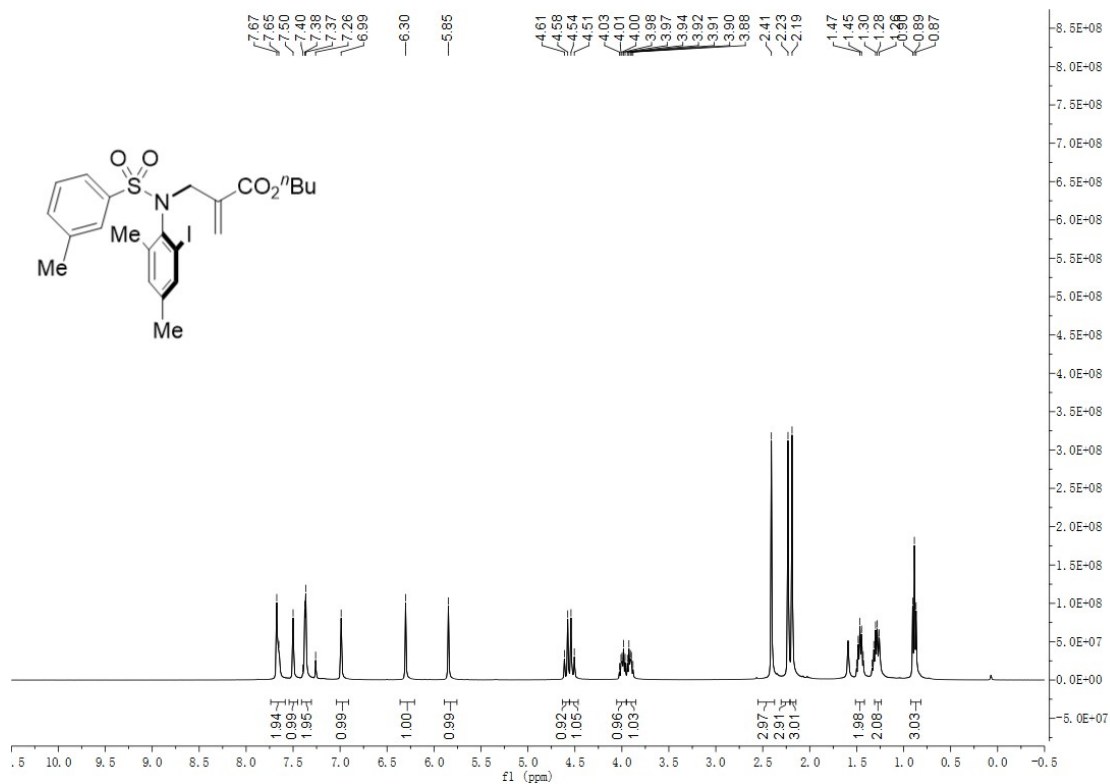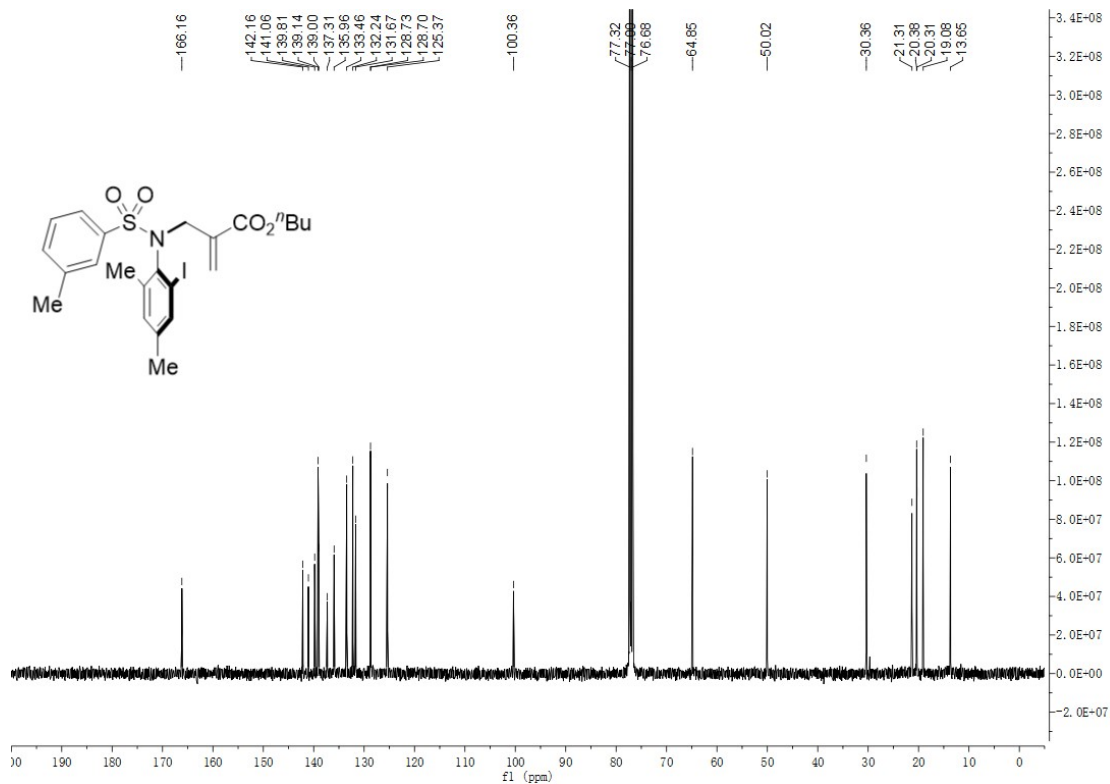

Compound 5p

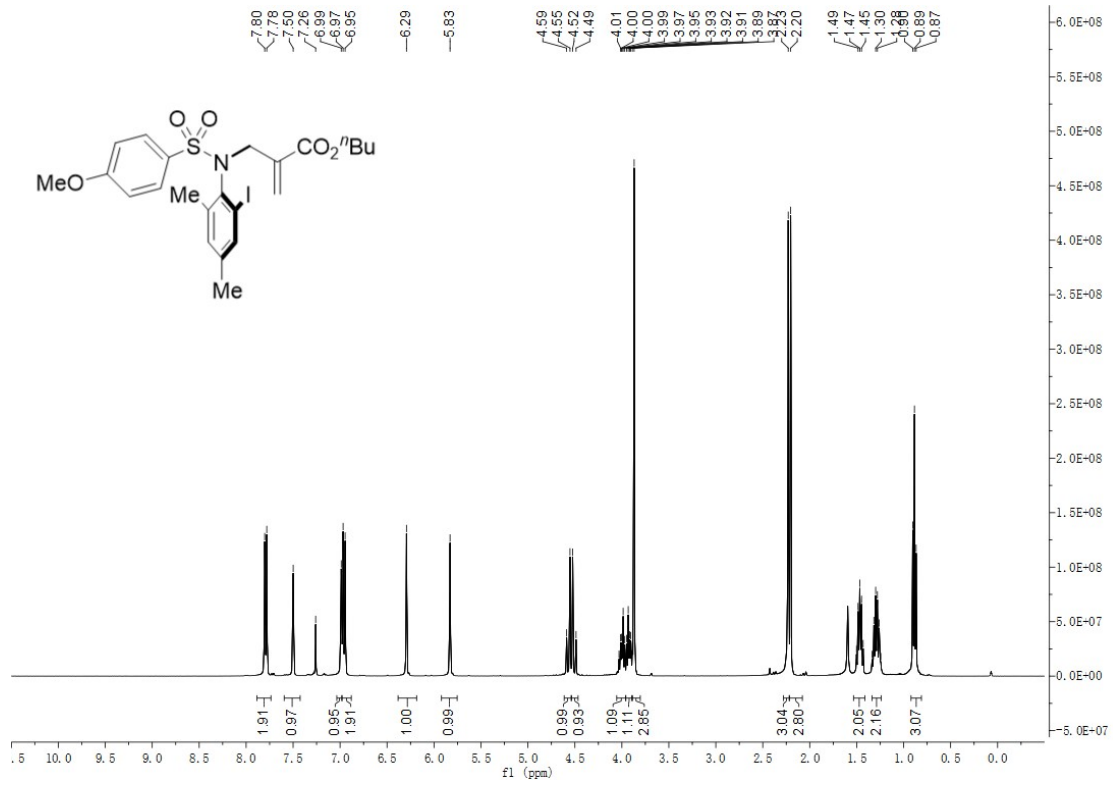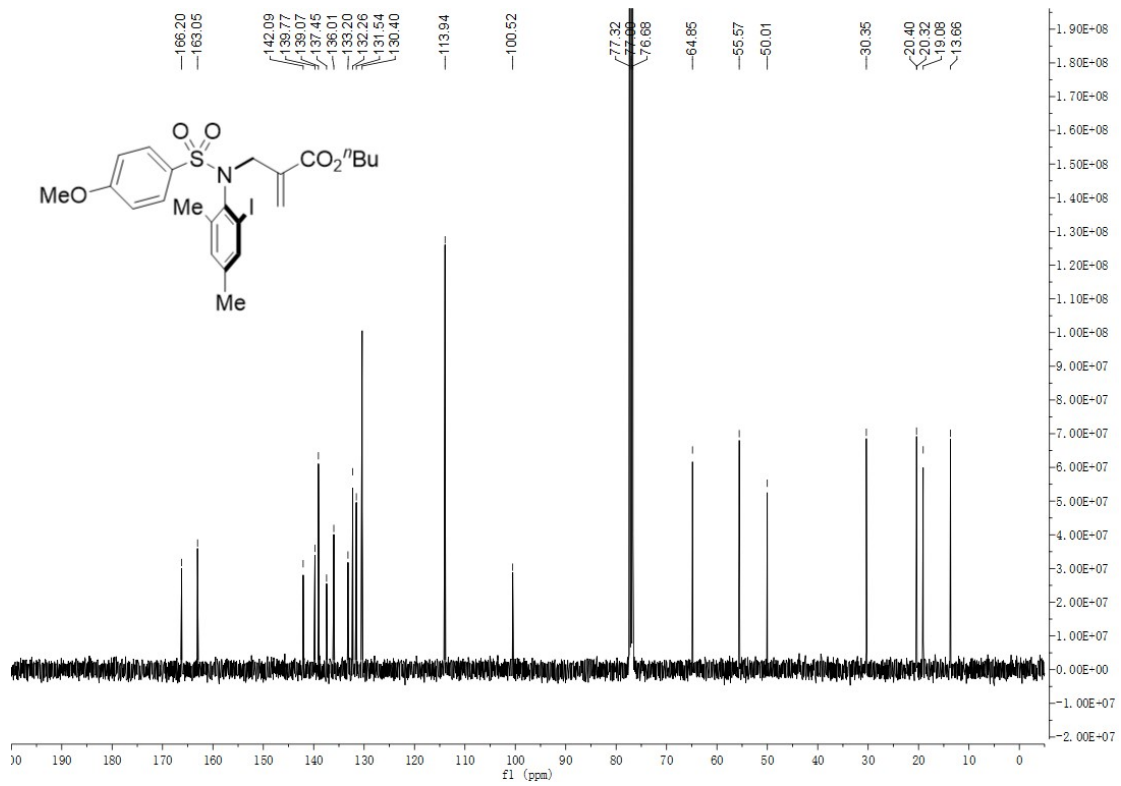

Compound 5q

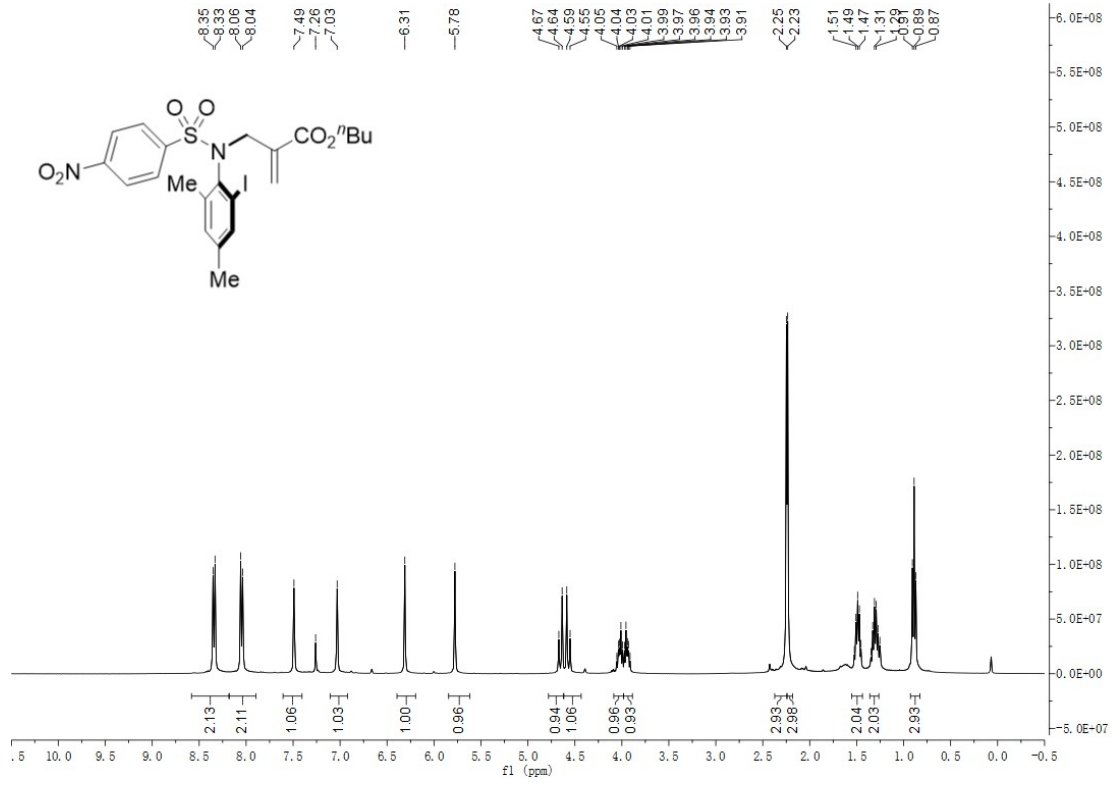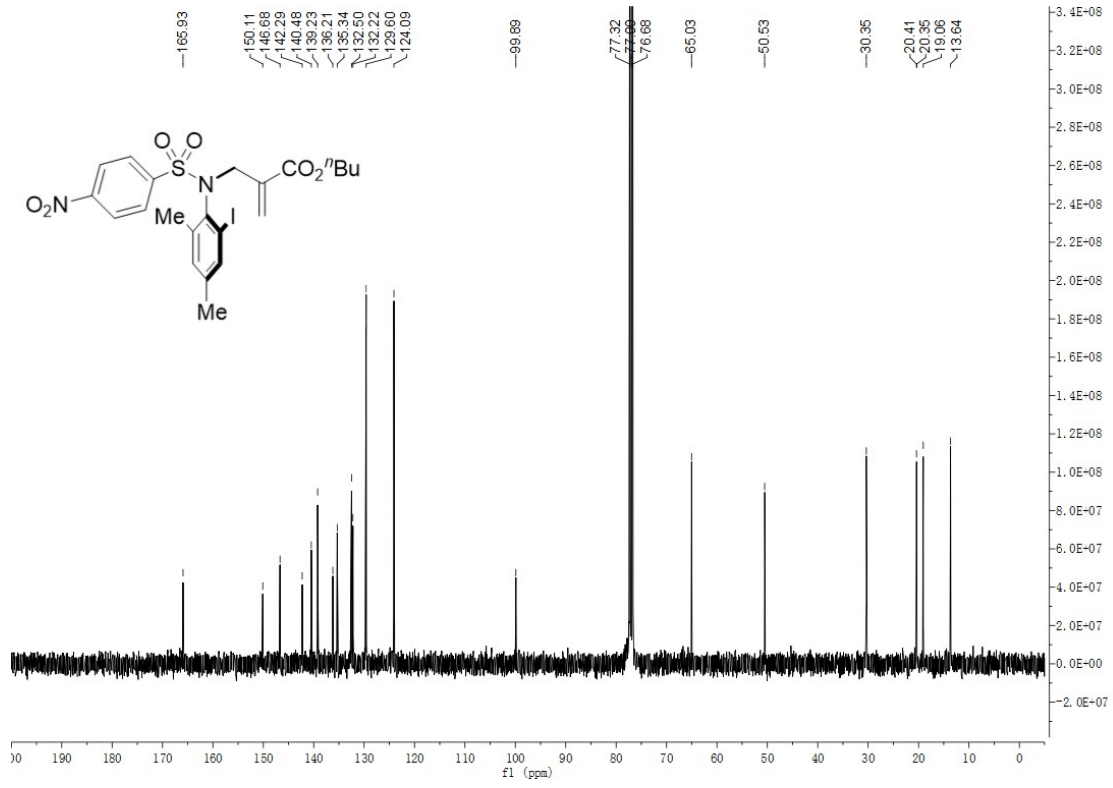

Compound 5r

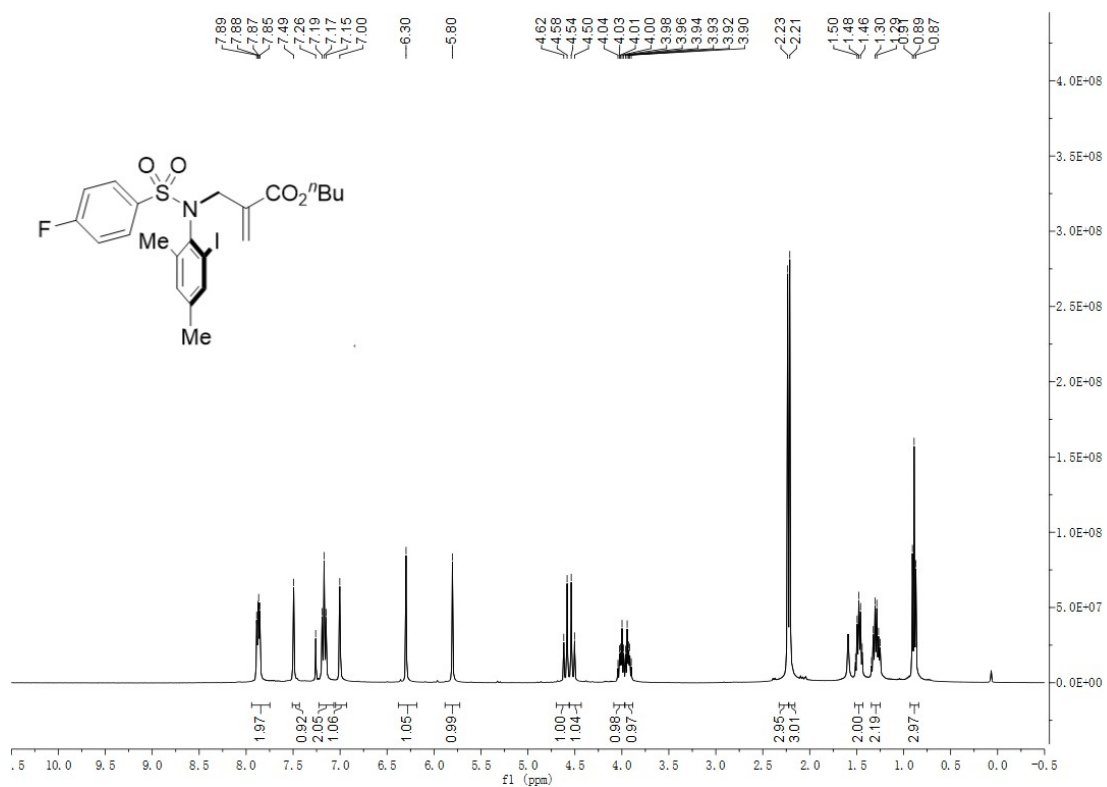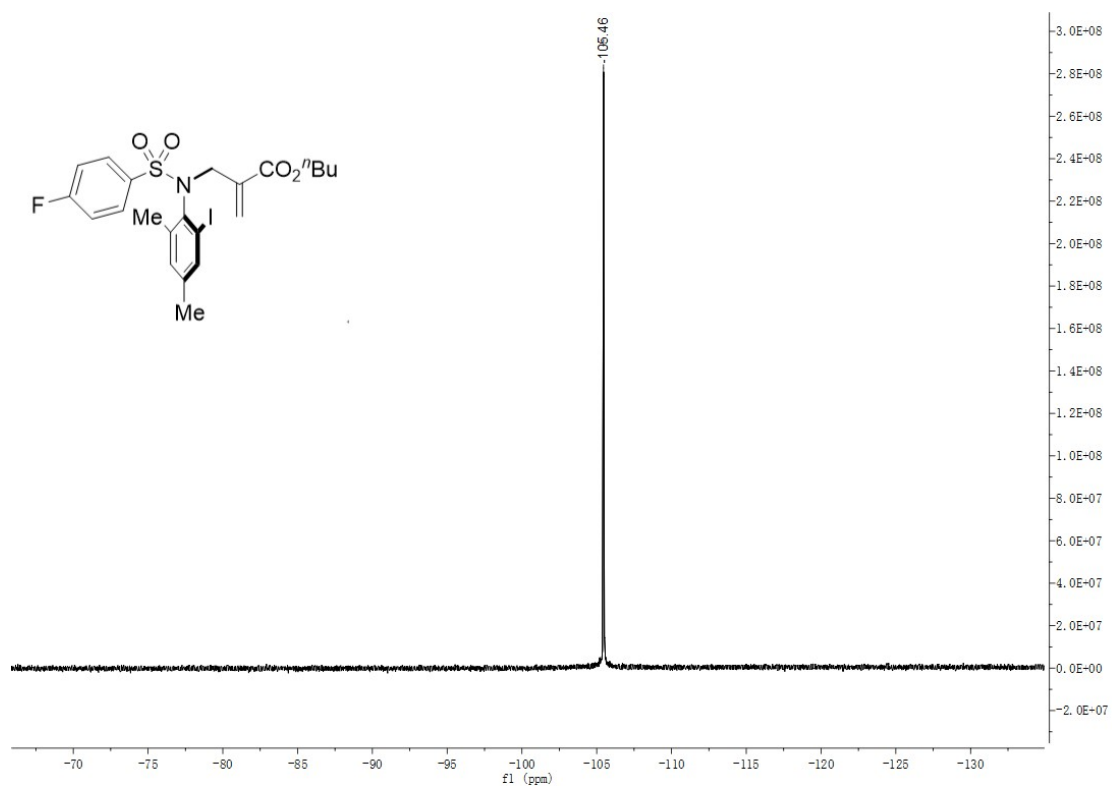

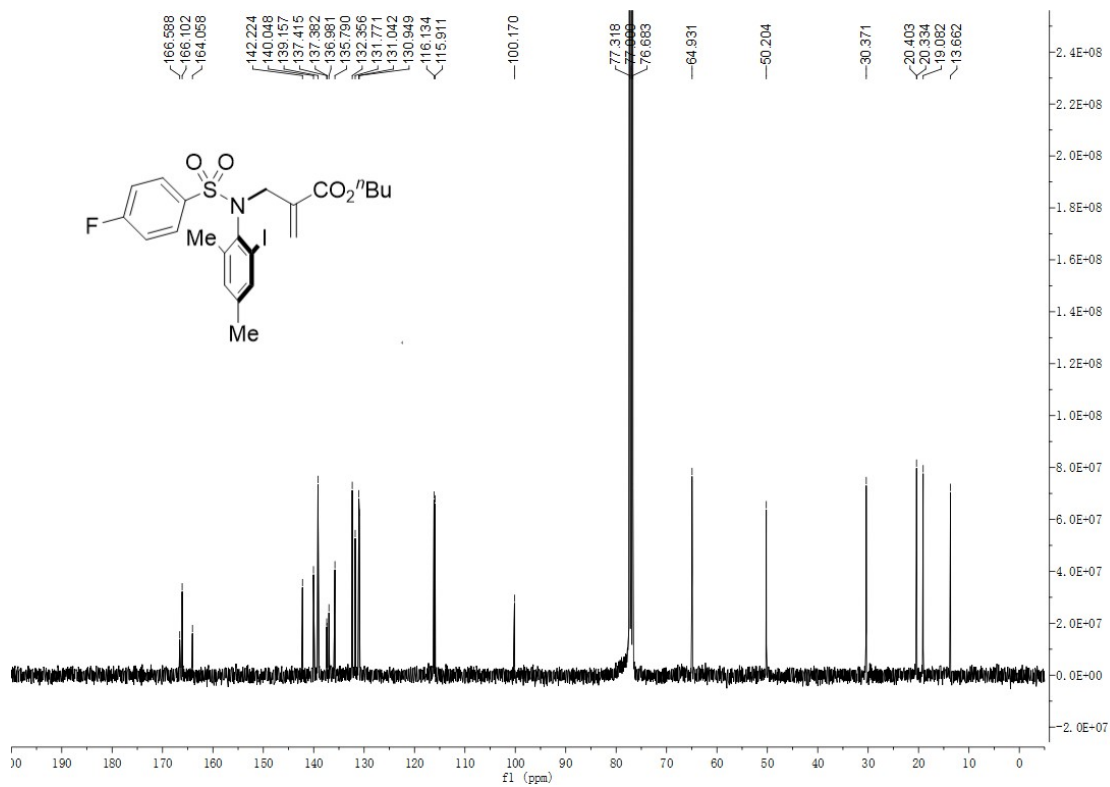

### Compound 5s

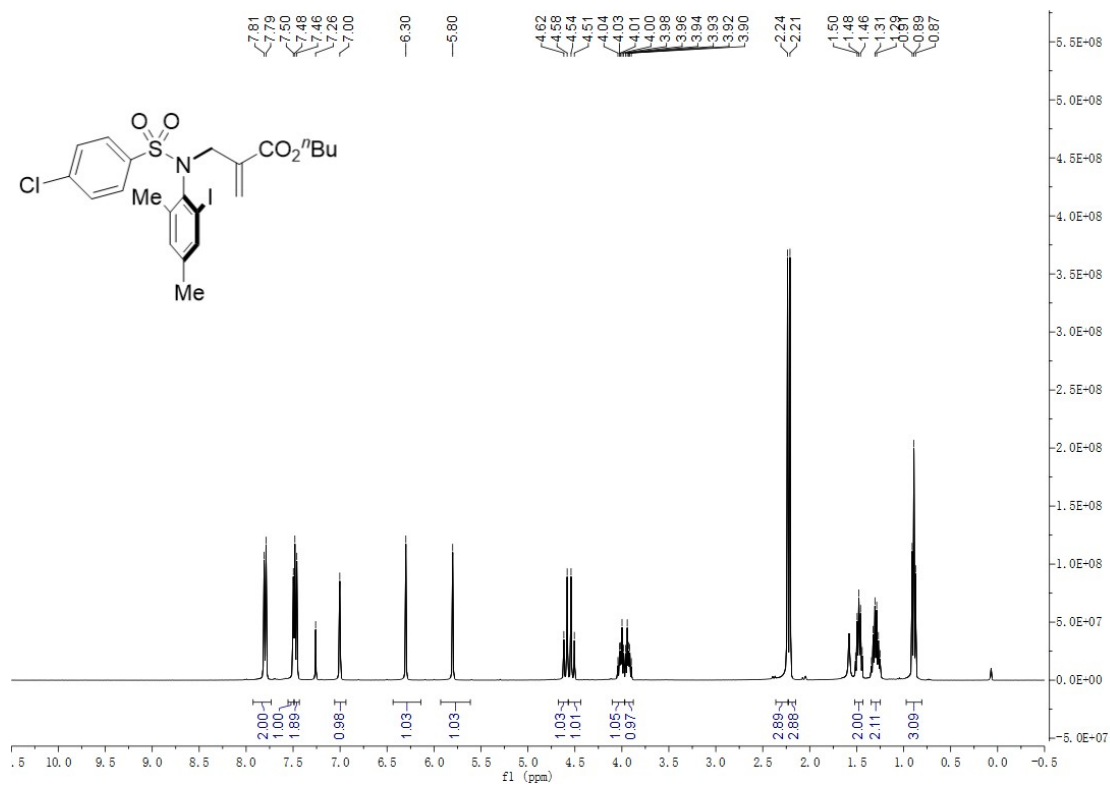

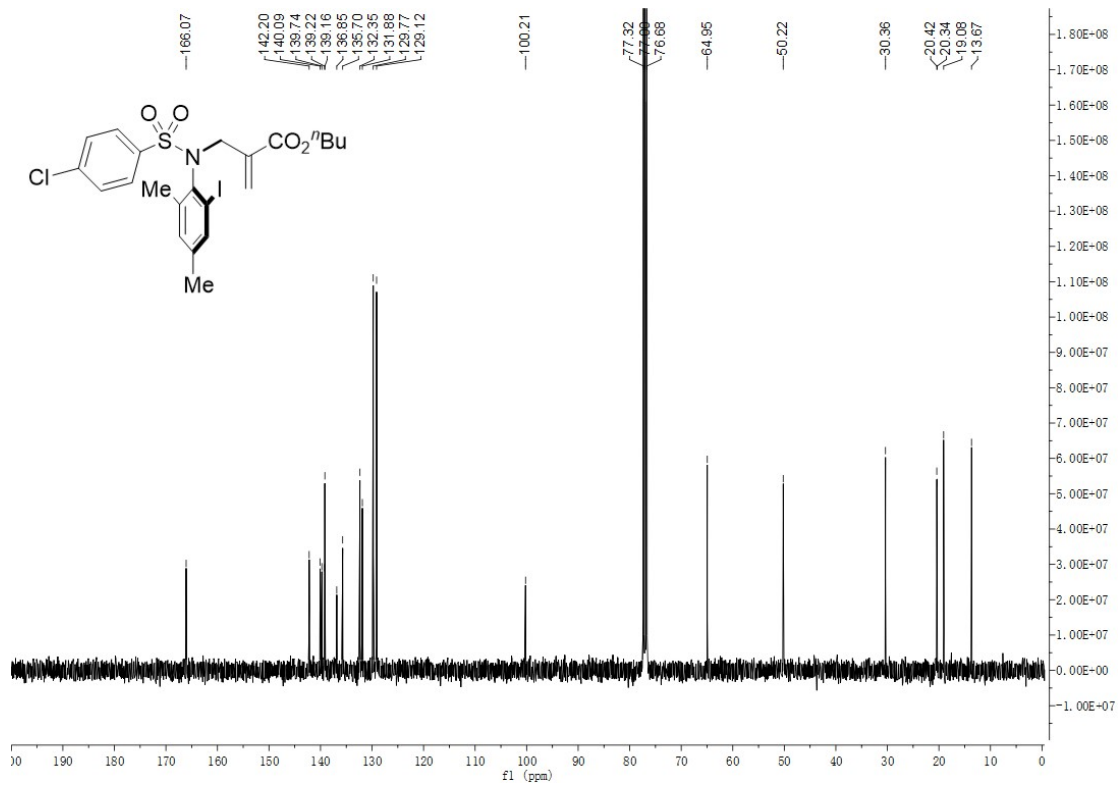

### Compound 5t

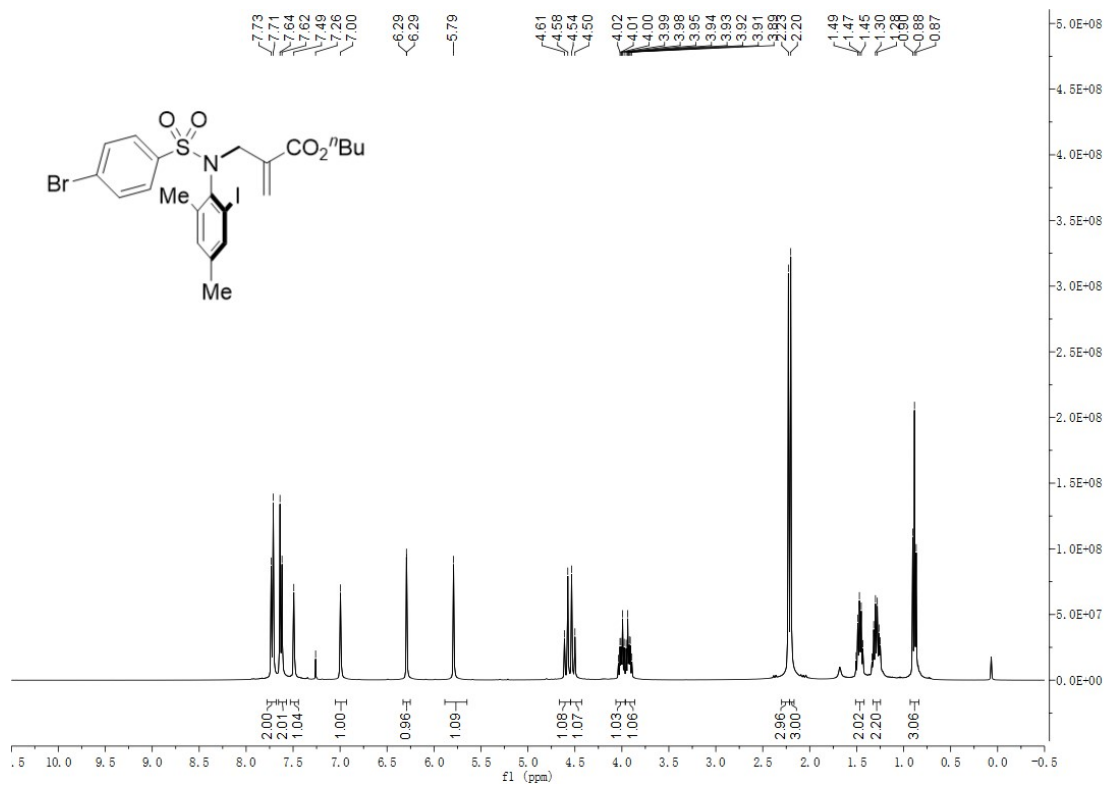

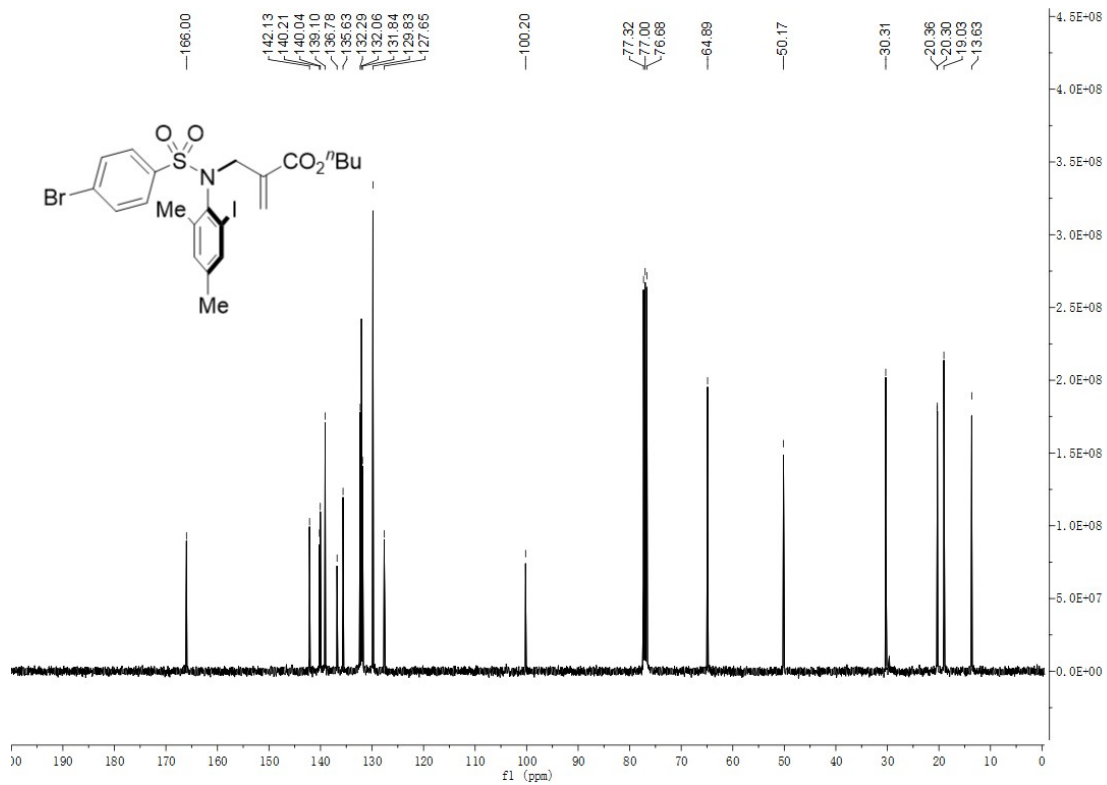

### Compound 5u

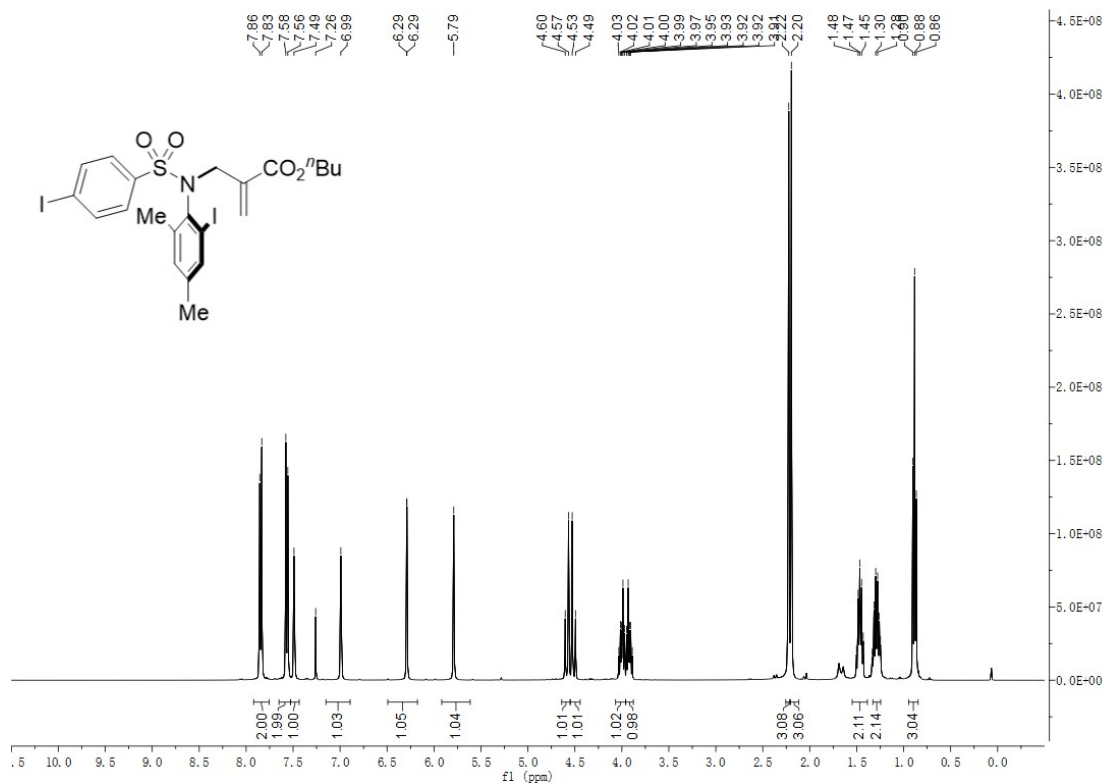



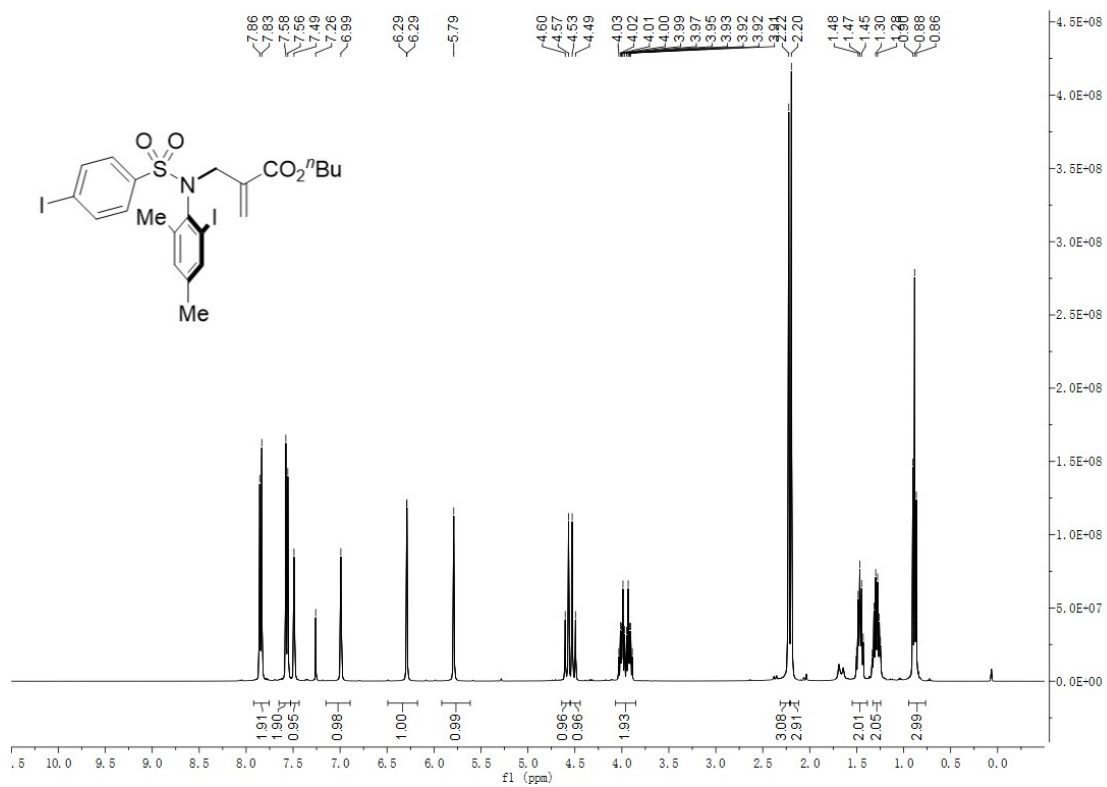

Compound 7a

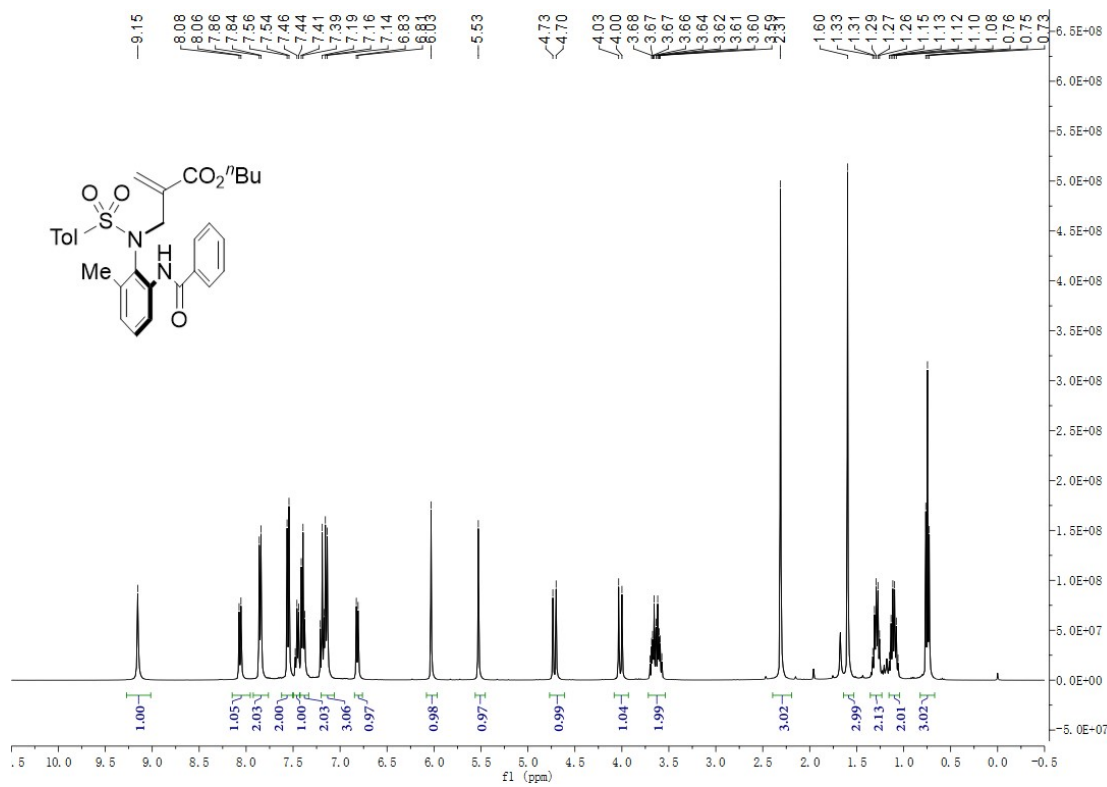

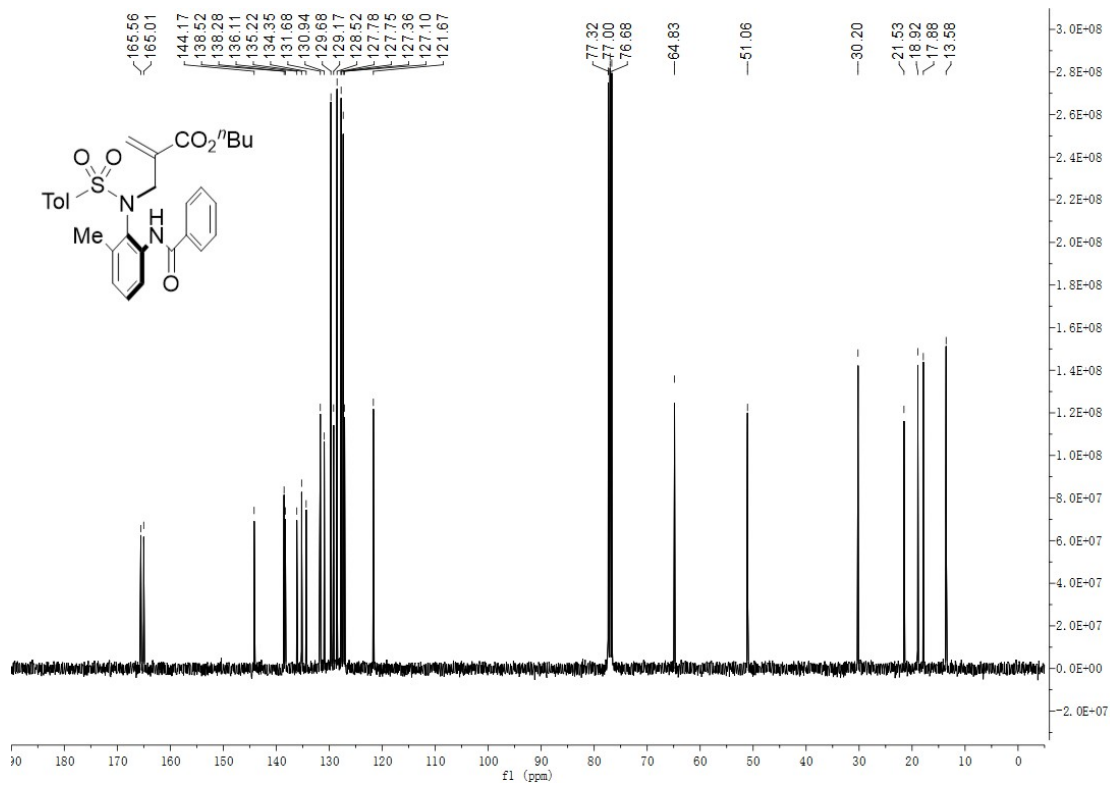

### Compound 7b

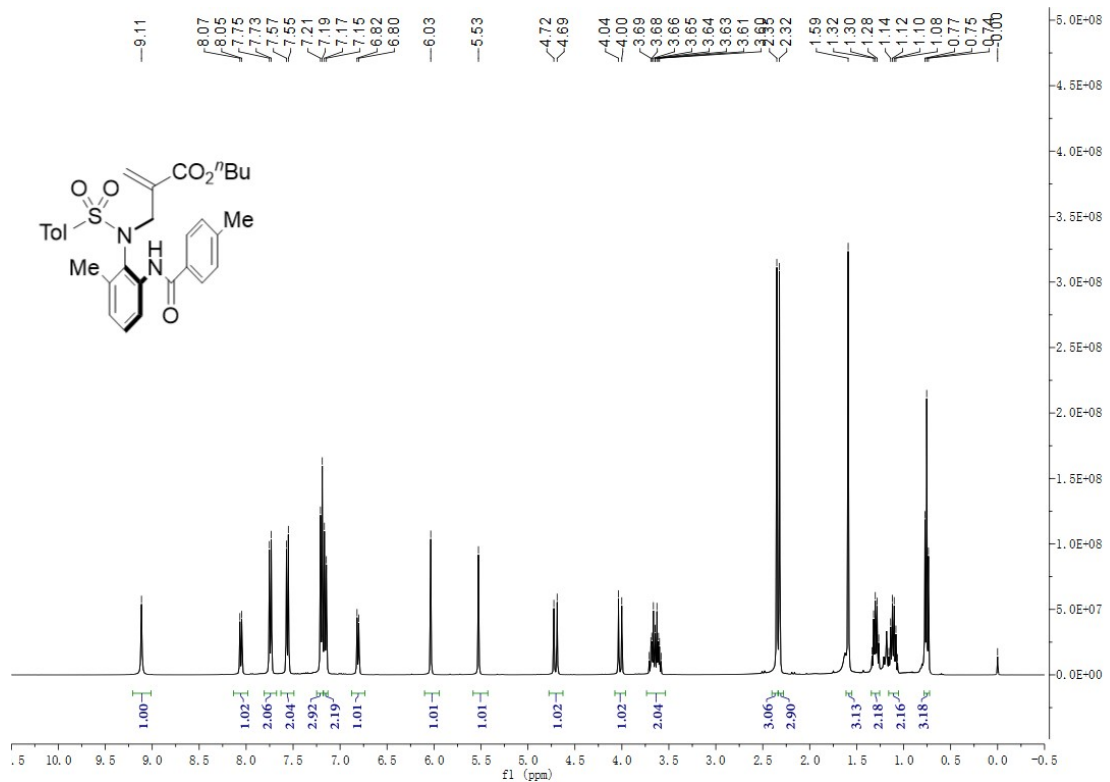

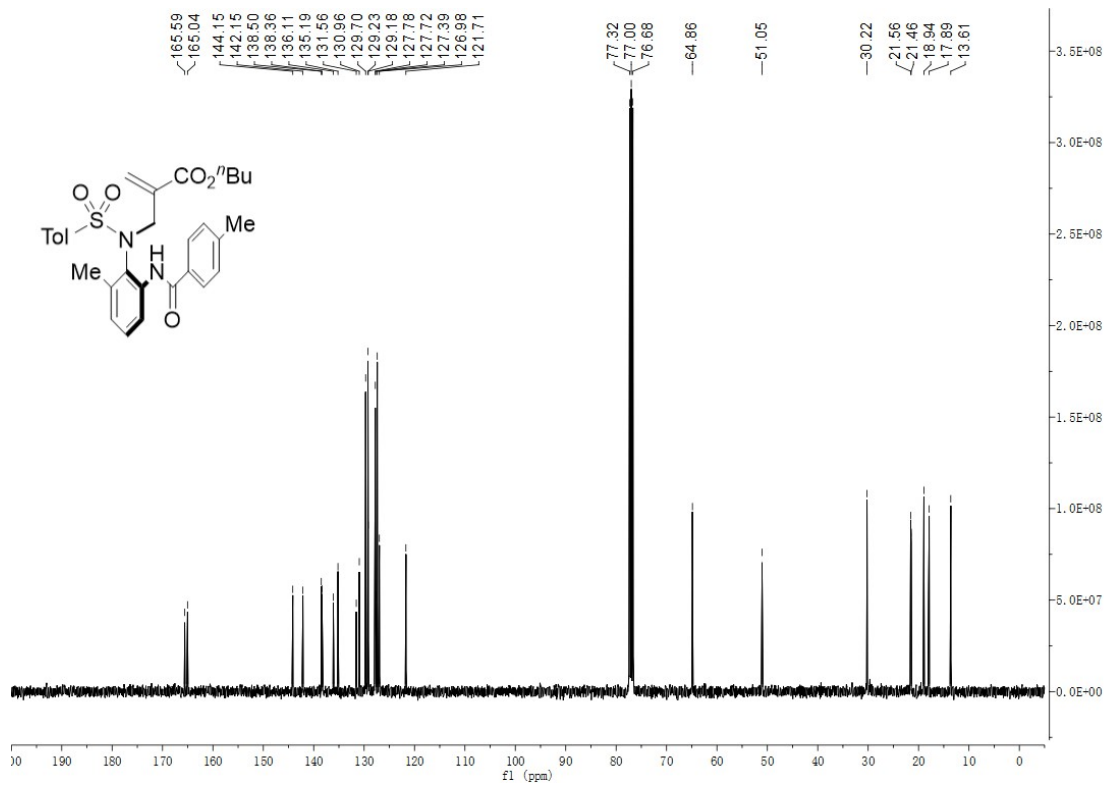

Compound 7c

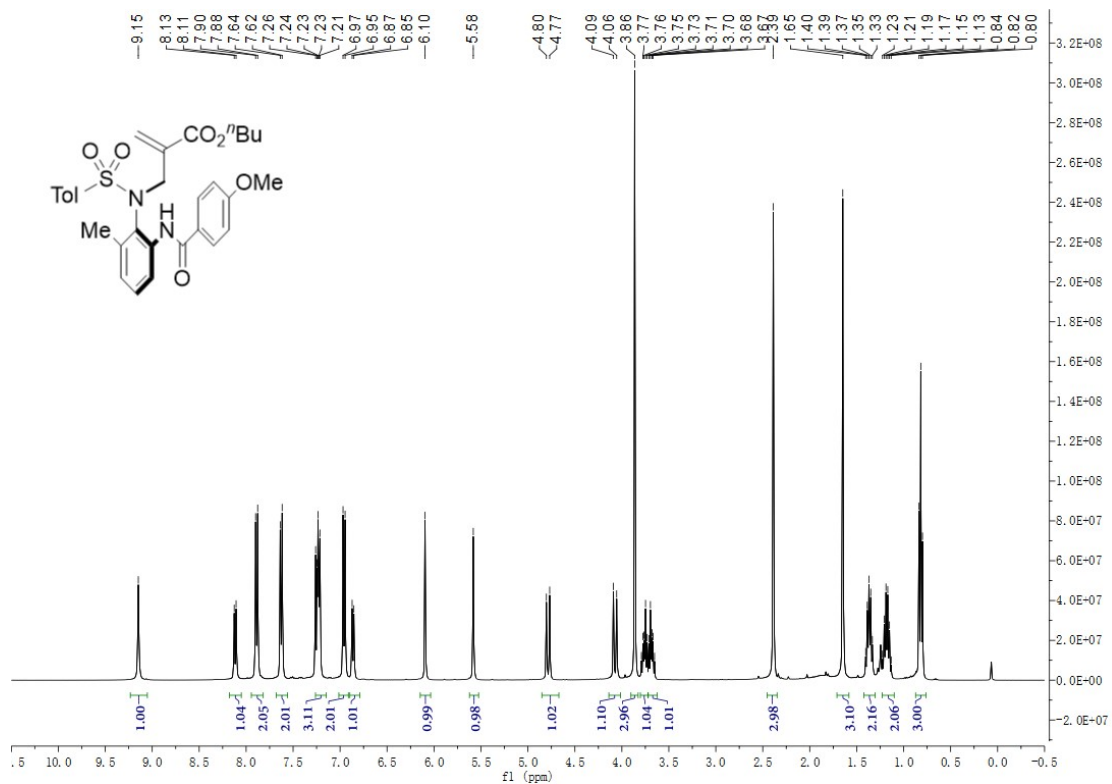

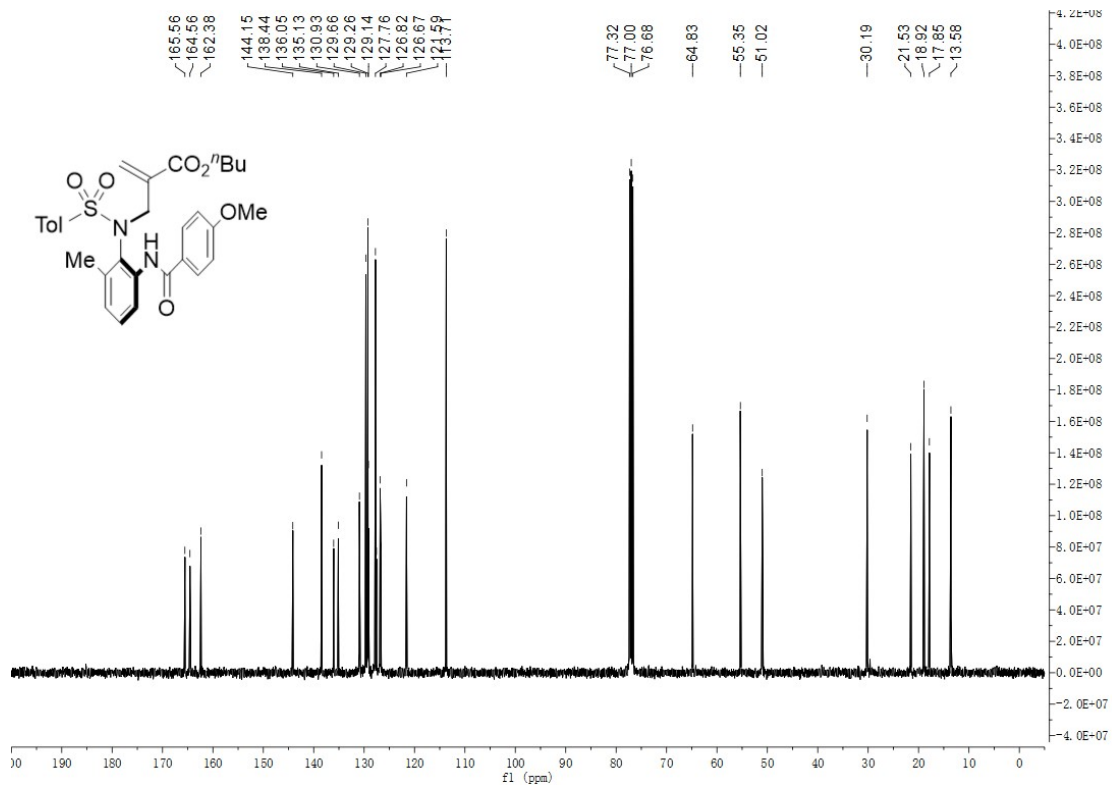

### Compound 7d

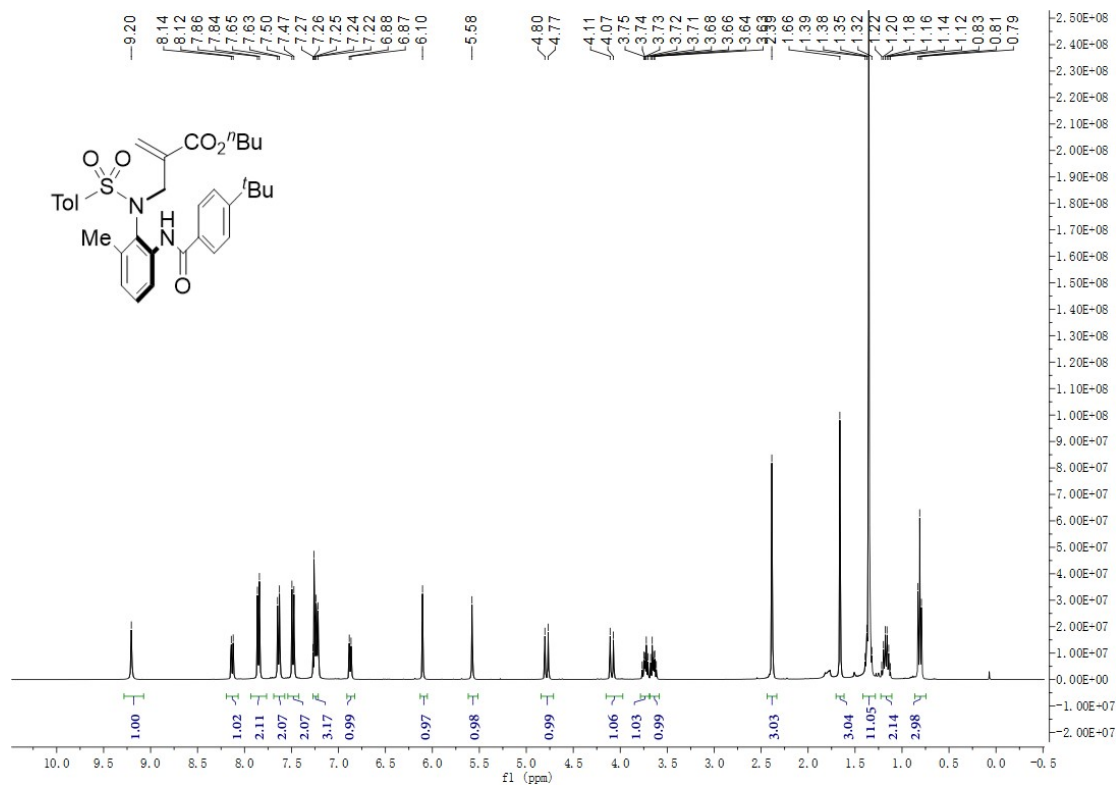

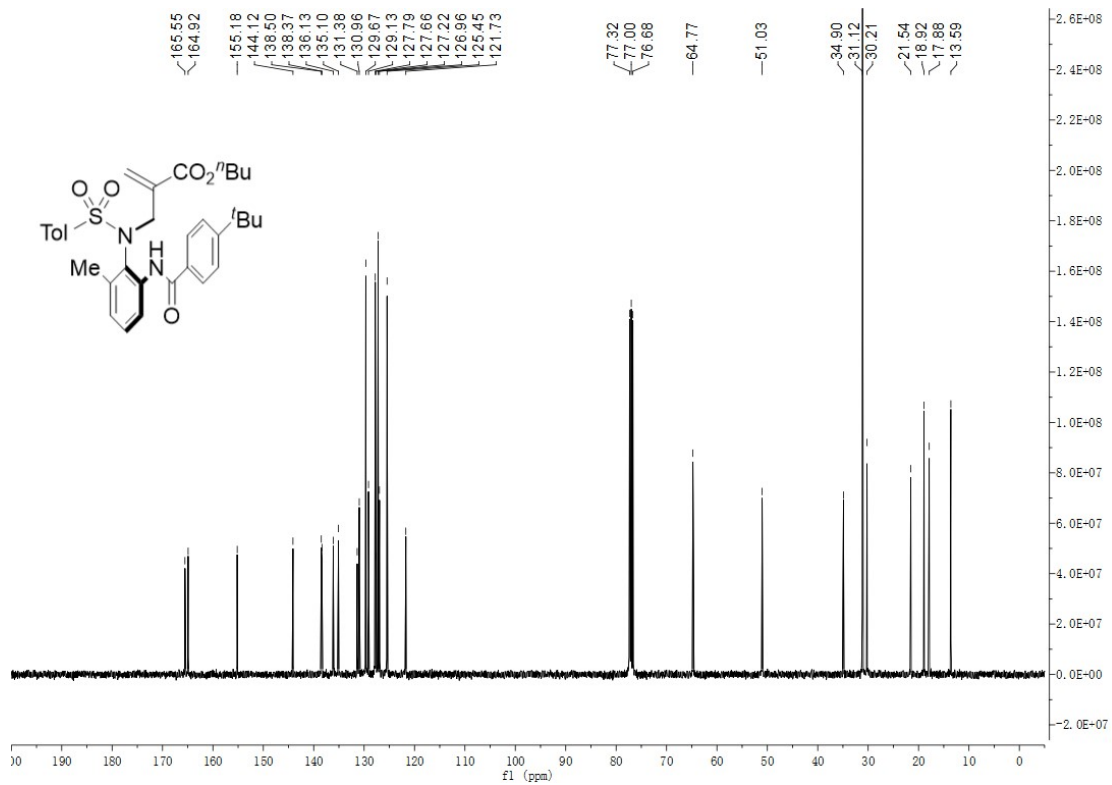

Compound 7e

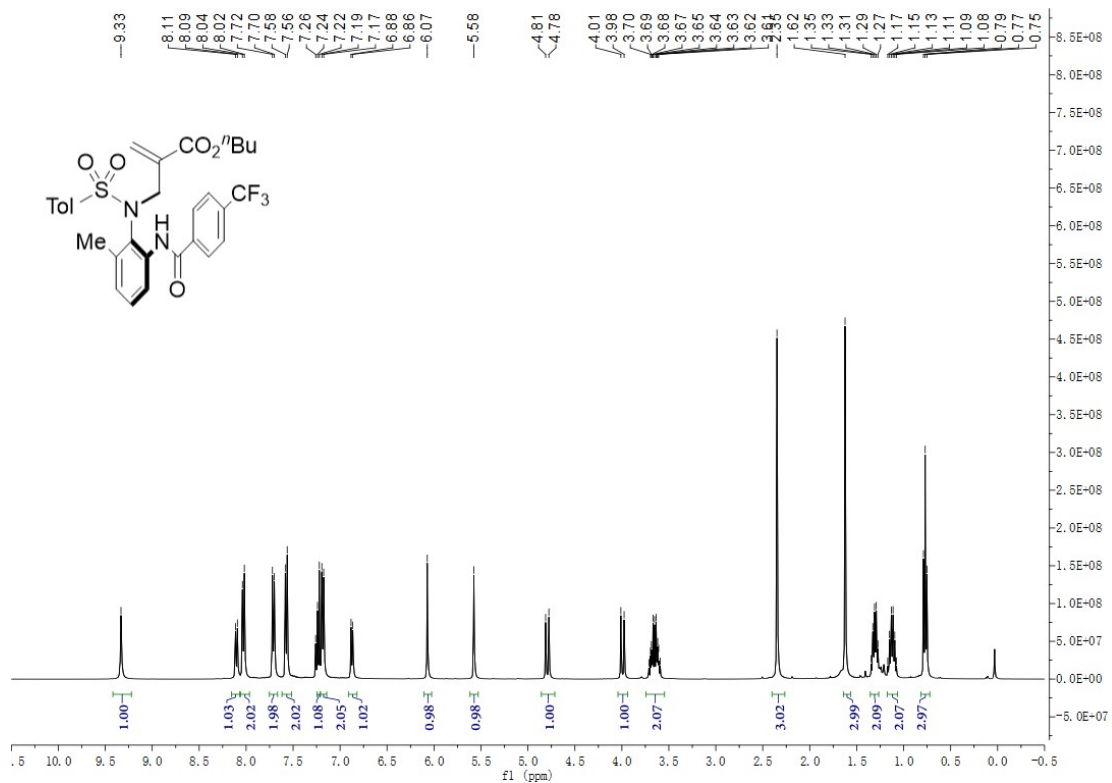

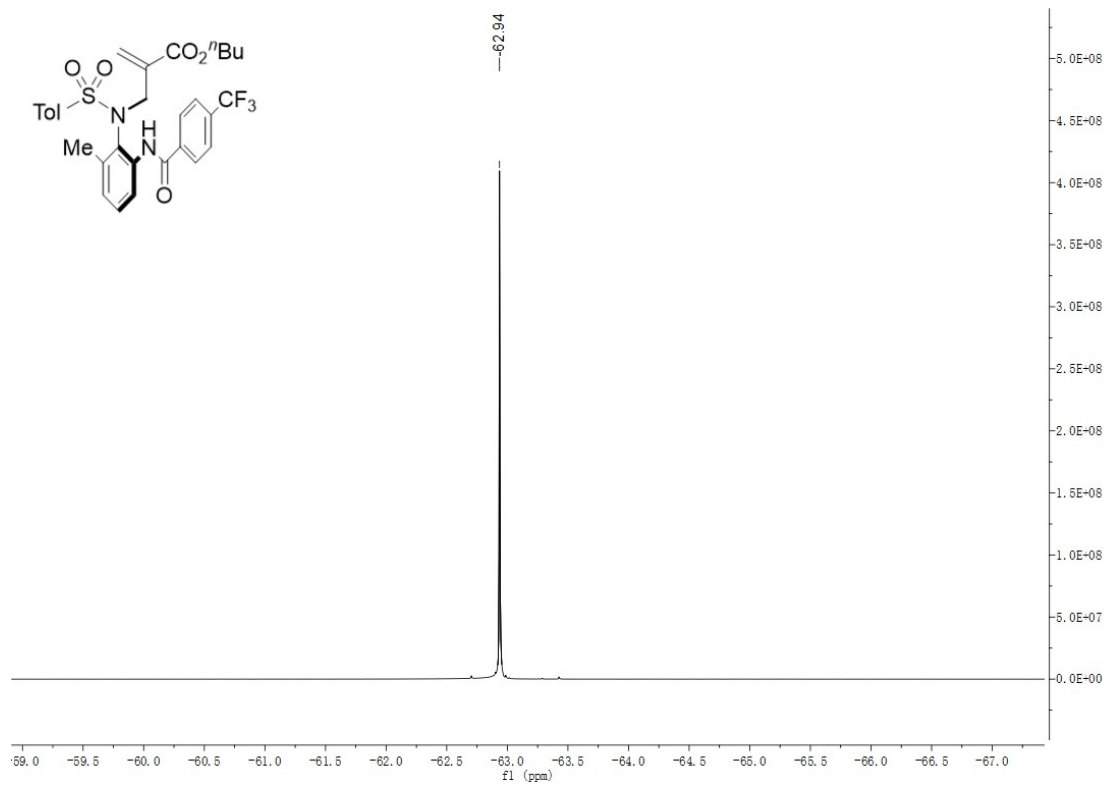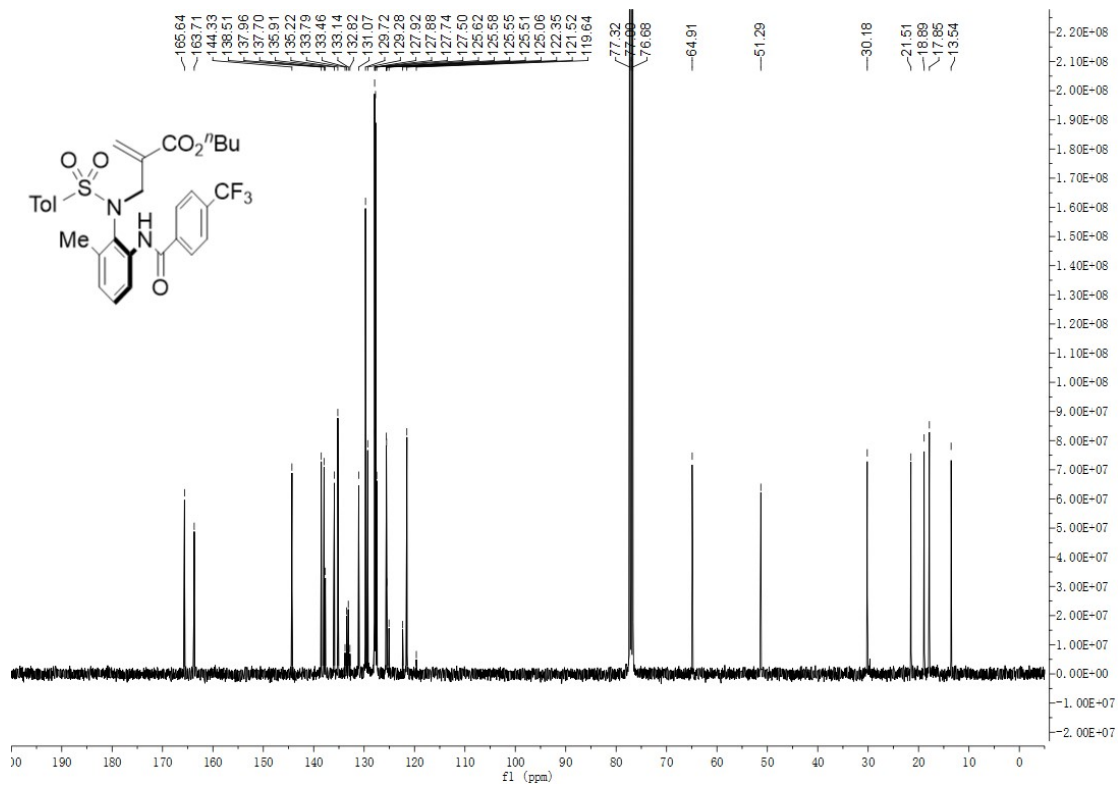

Compound **6f**

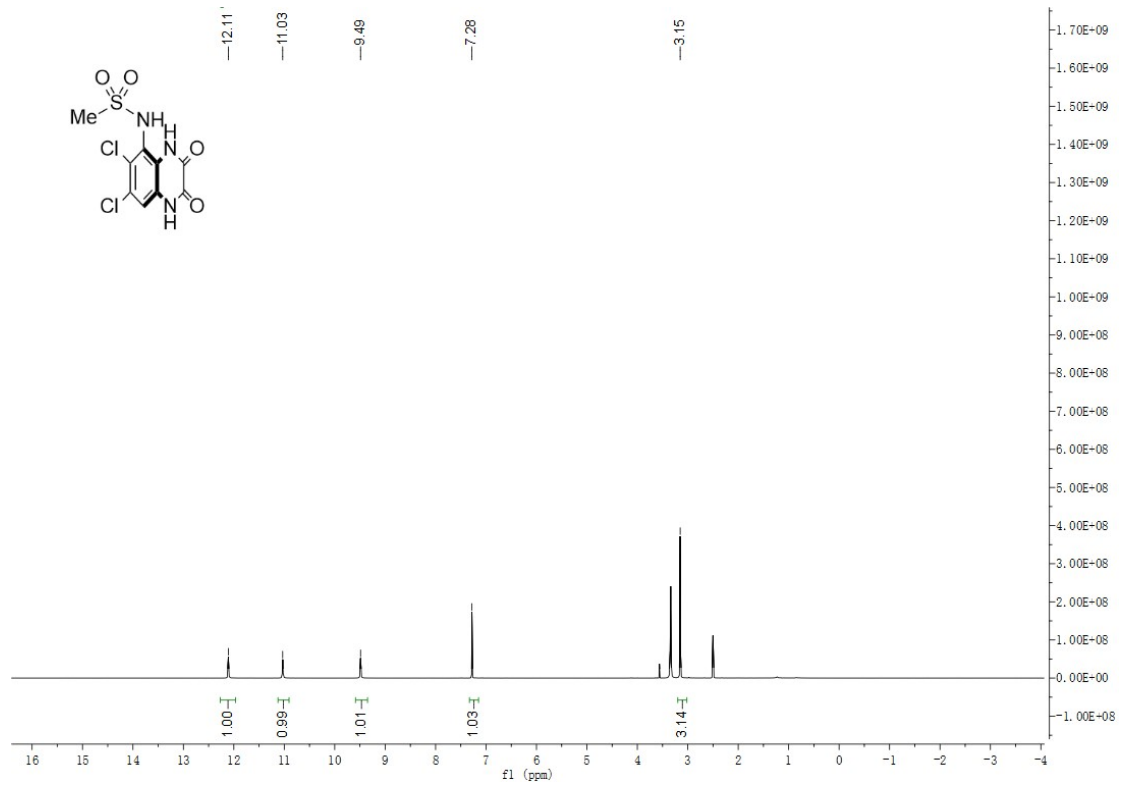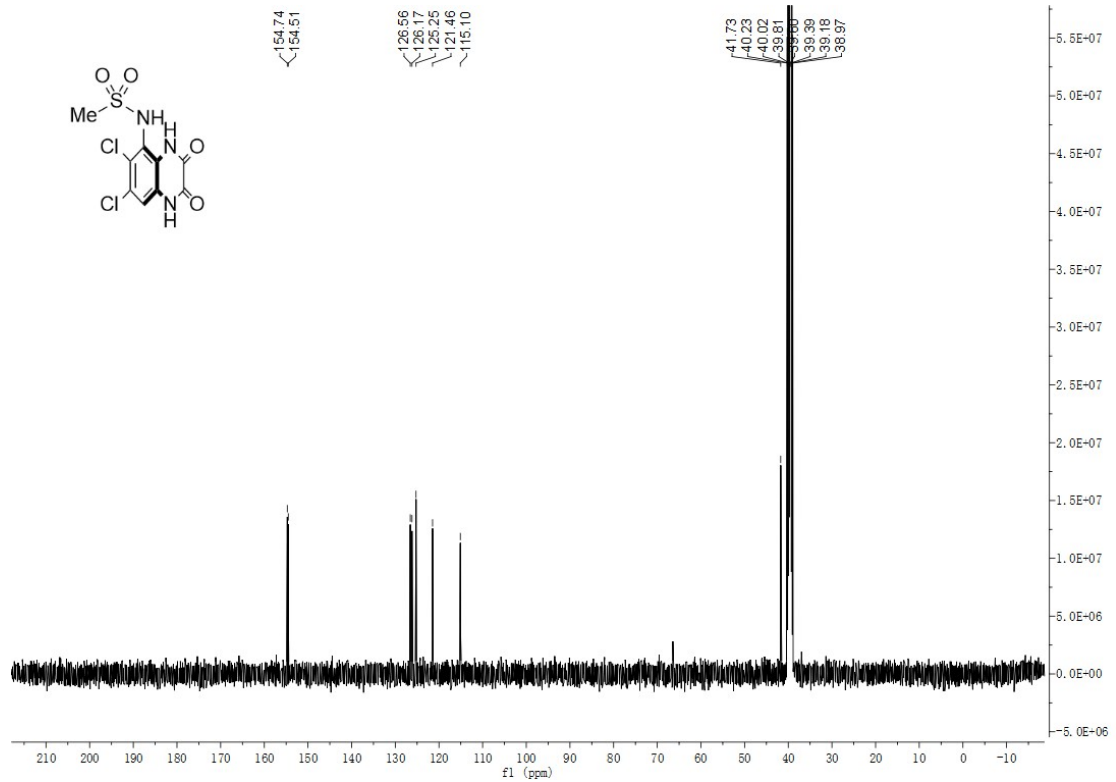

# Compound 7g

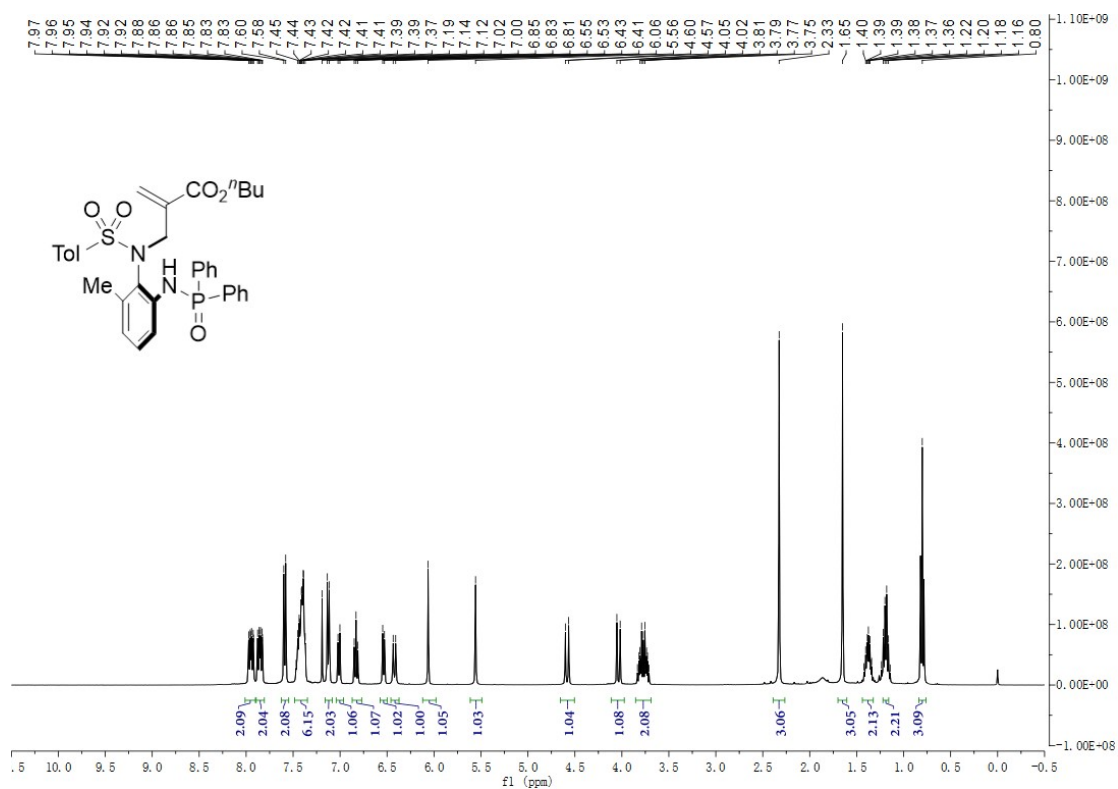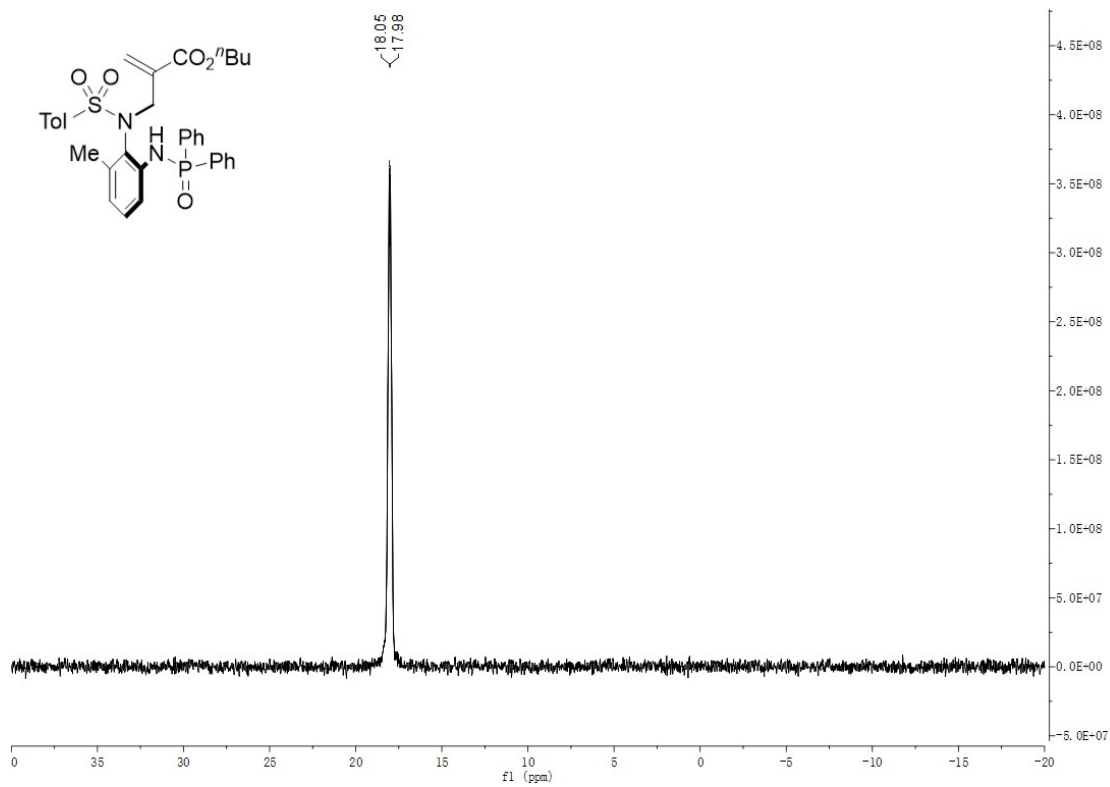



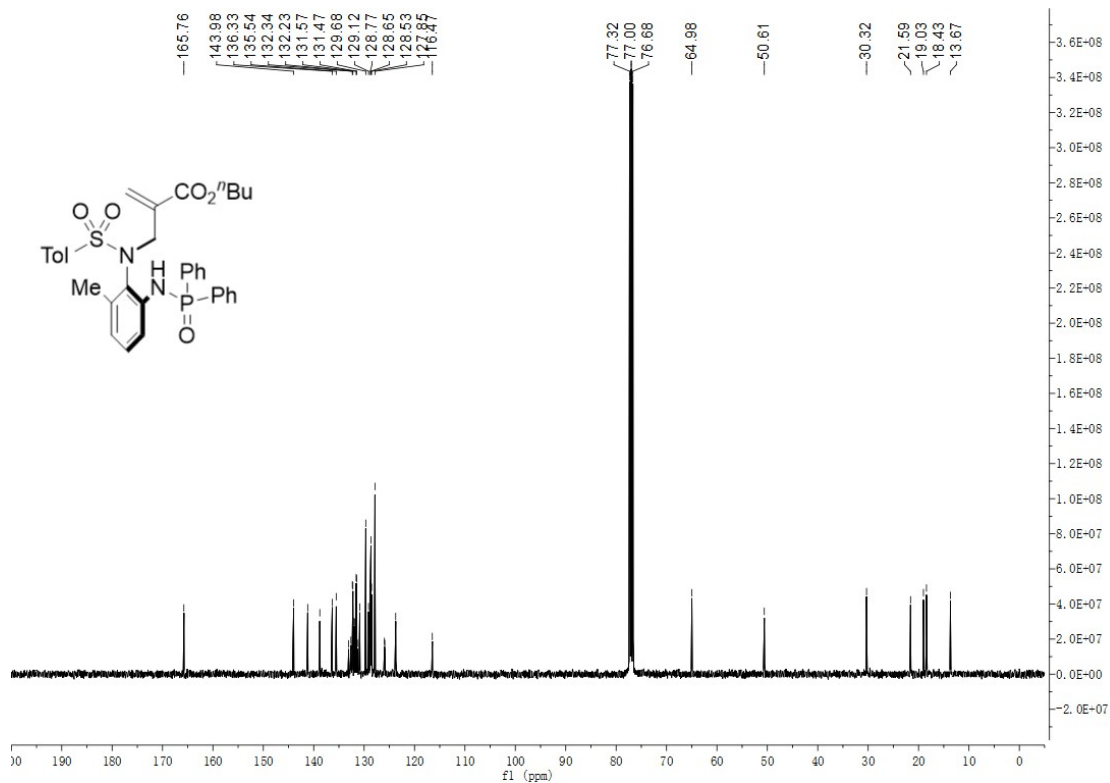

### Compound 7h

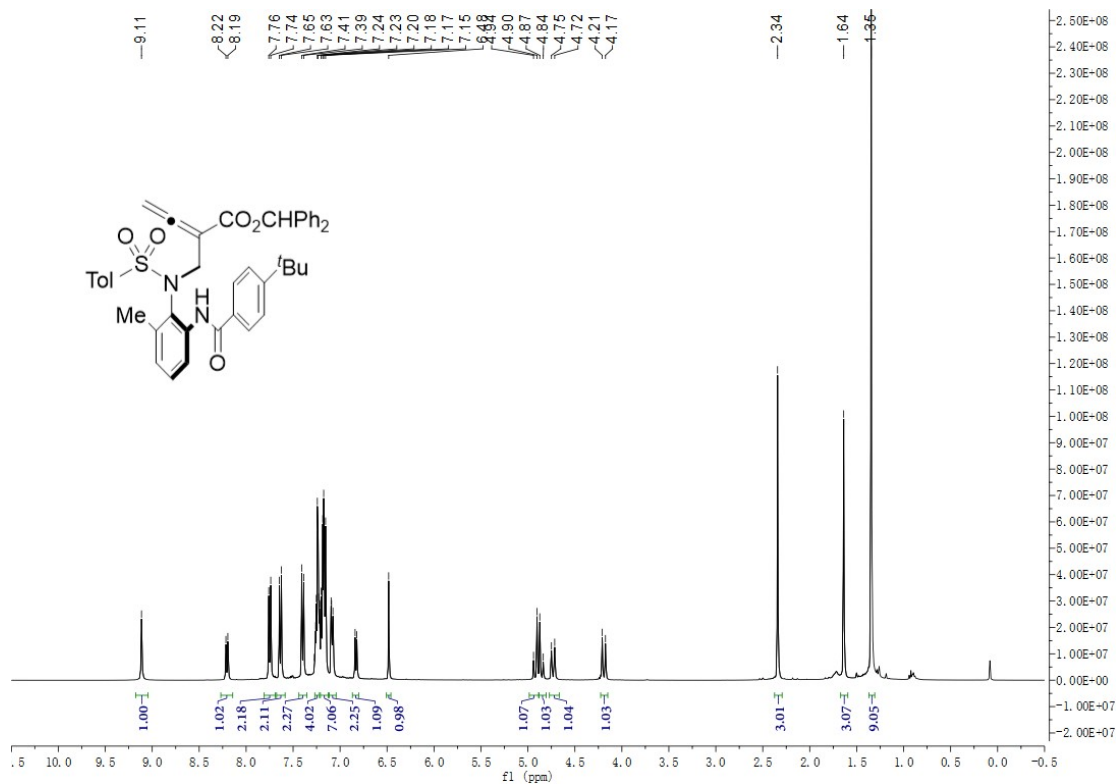

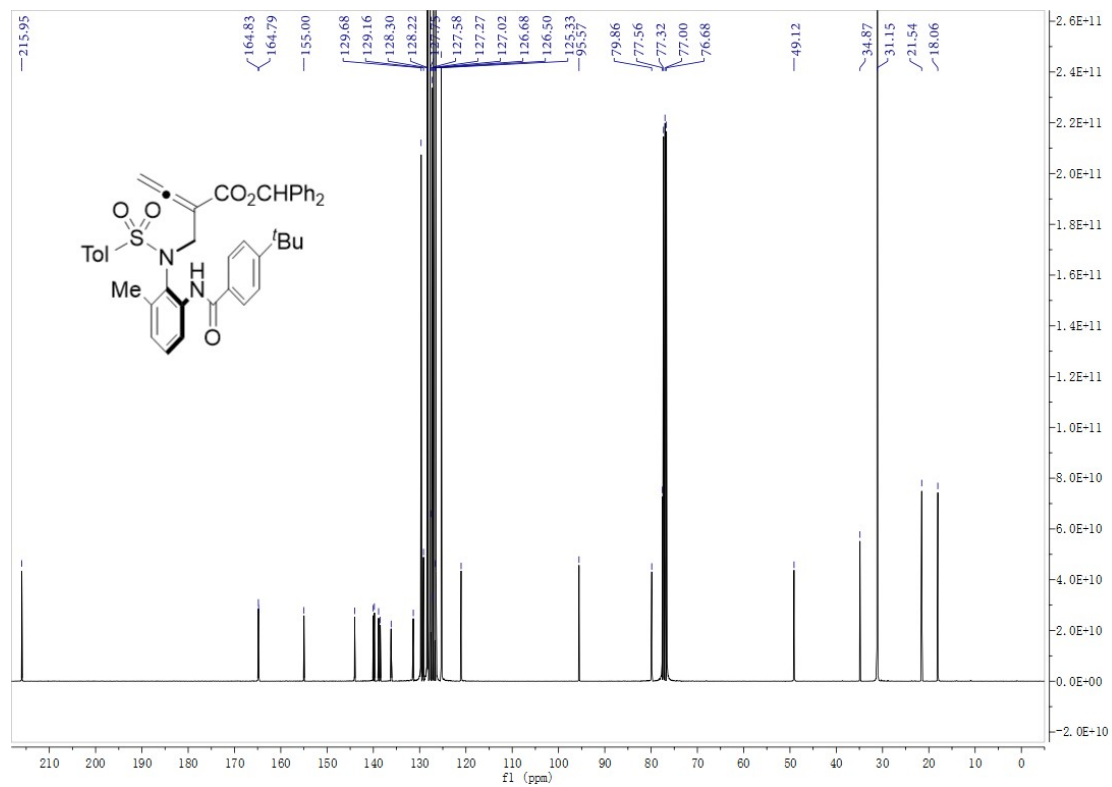

Compound 7i

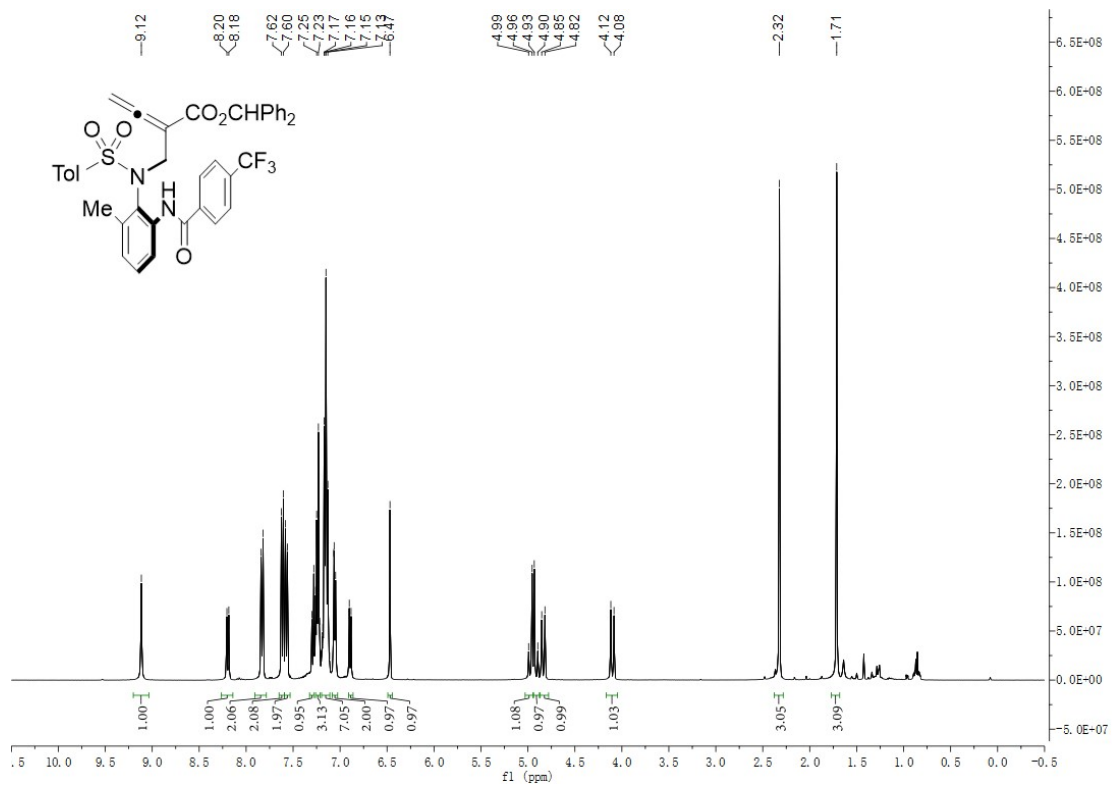

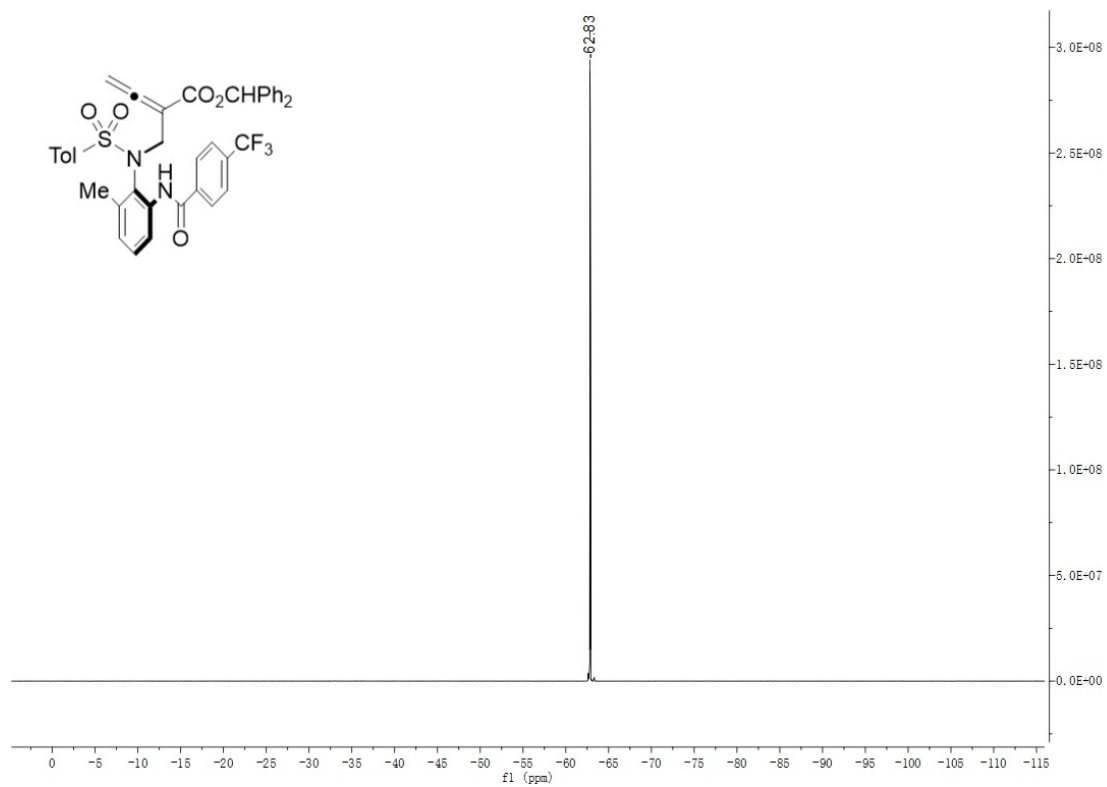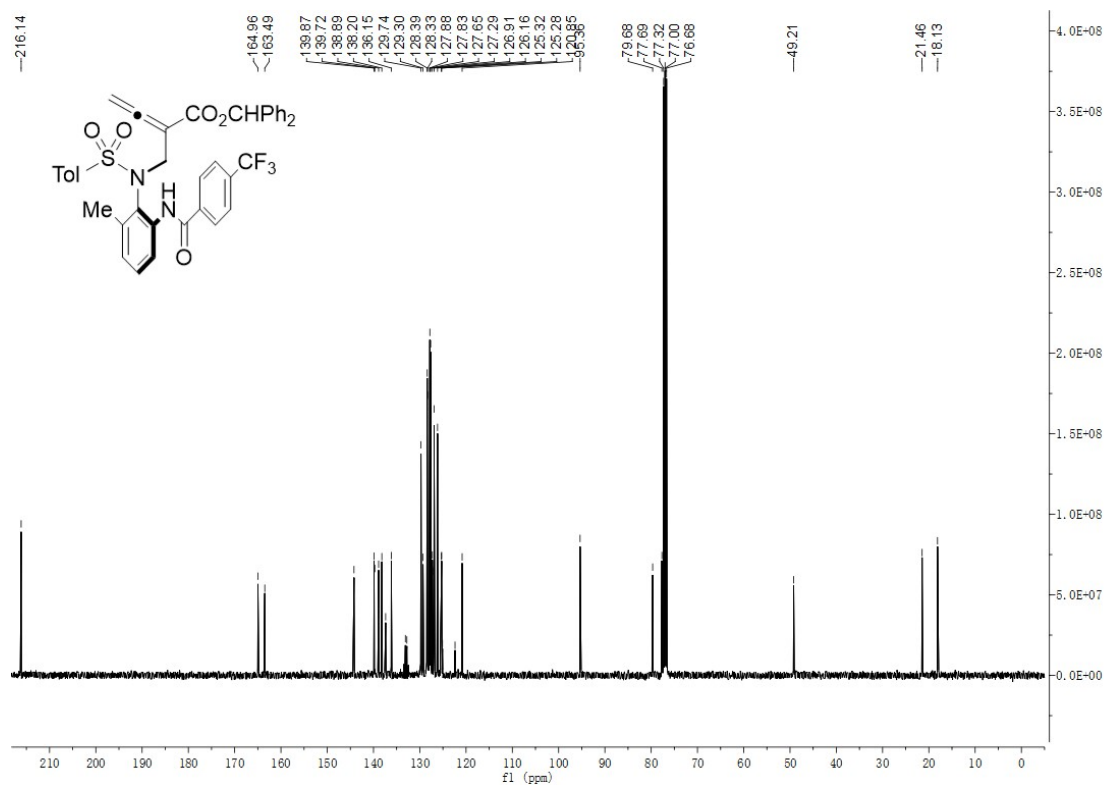

Compound 8a

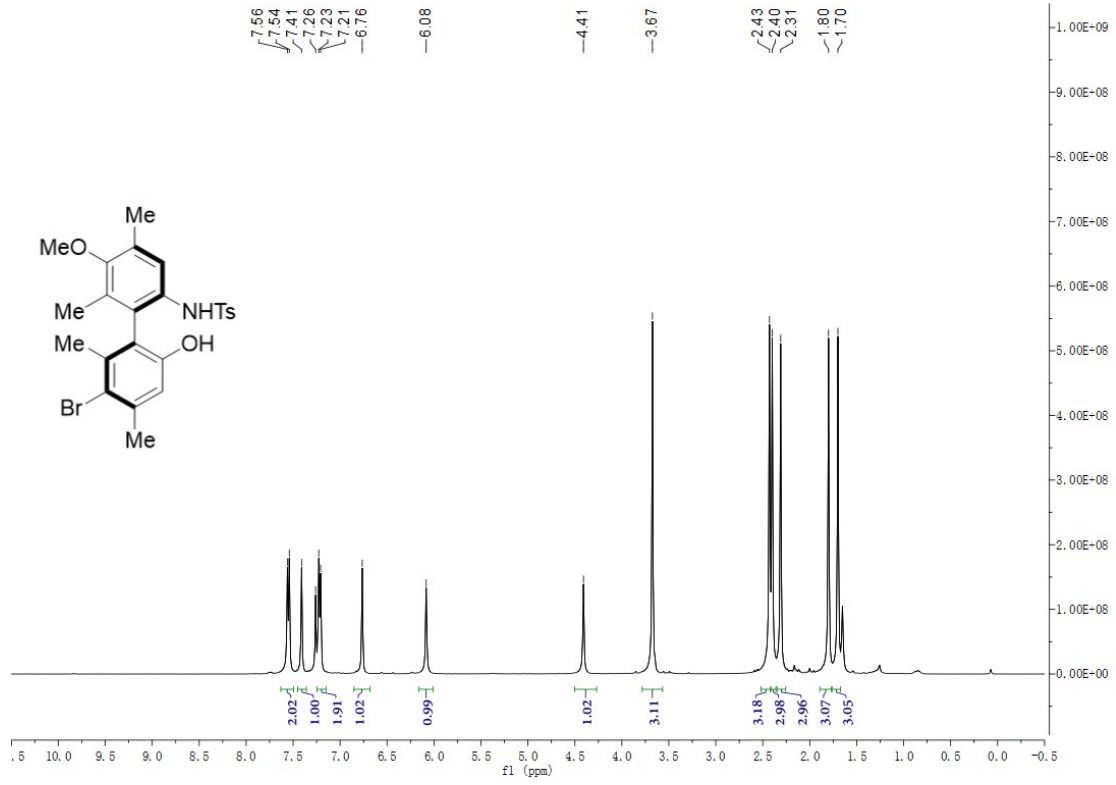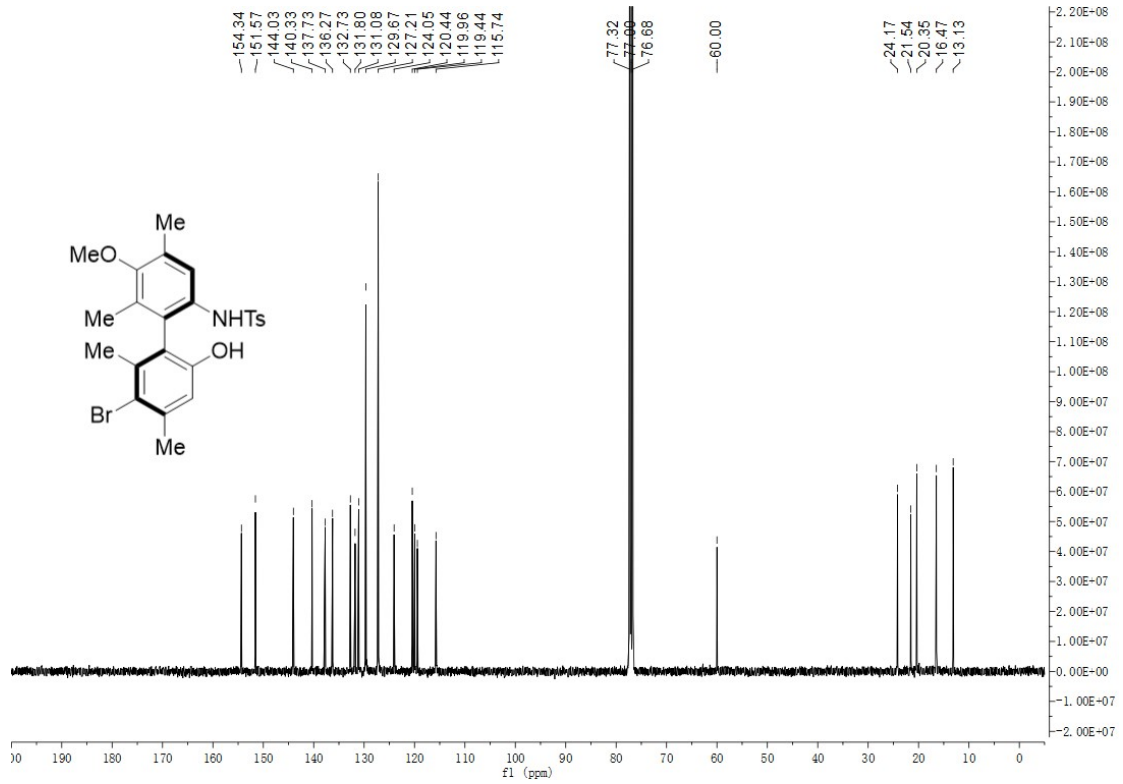

Compound **8b**

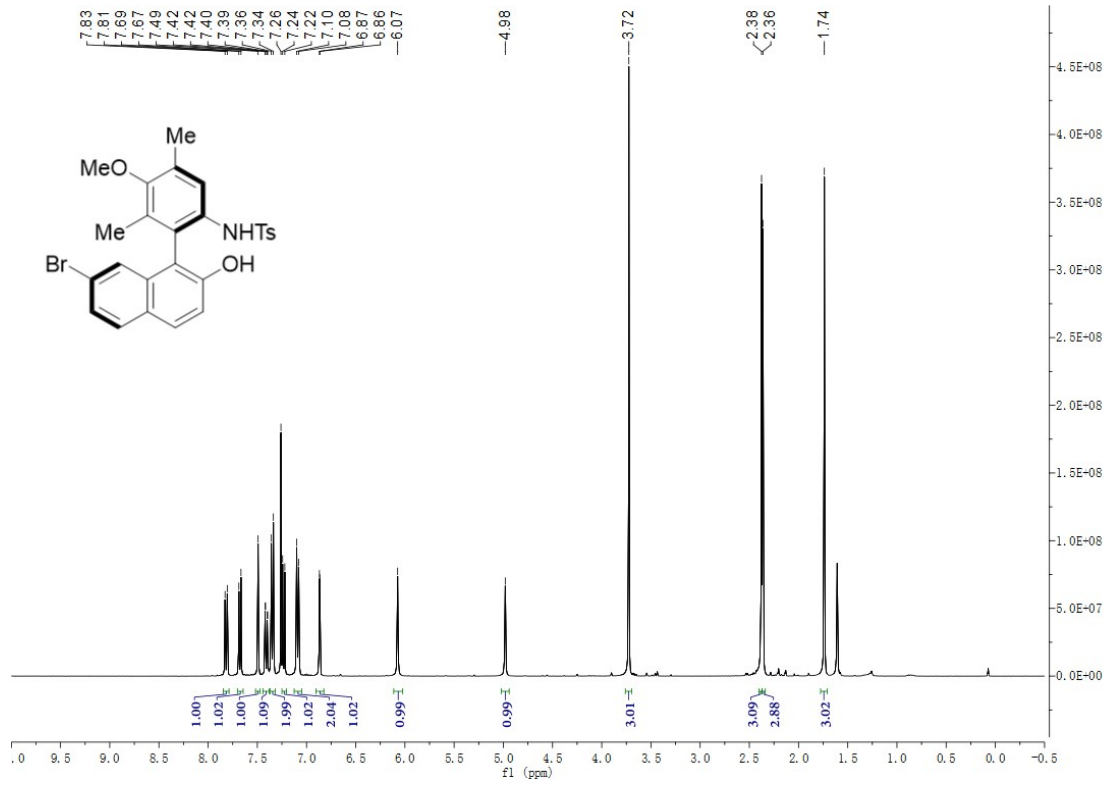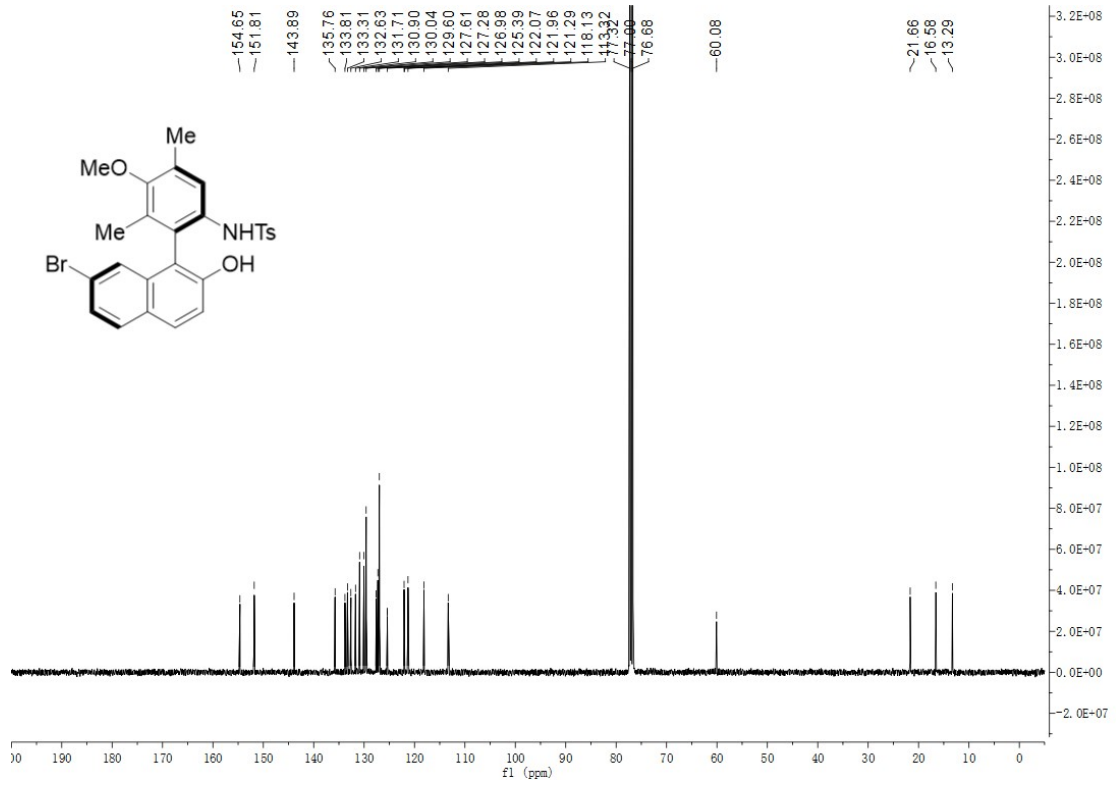

Compound **8c**

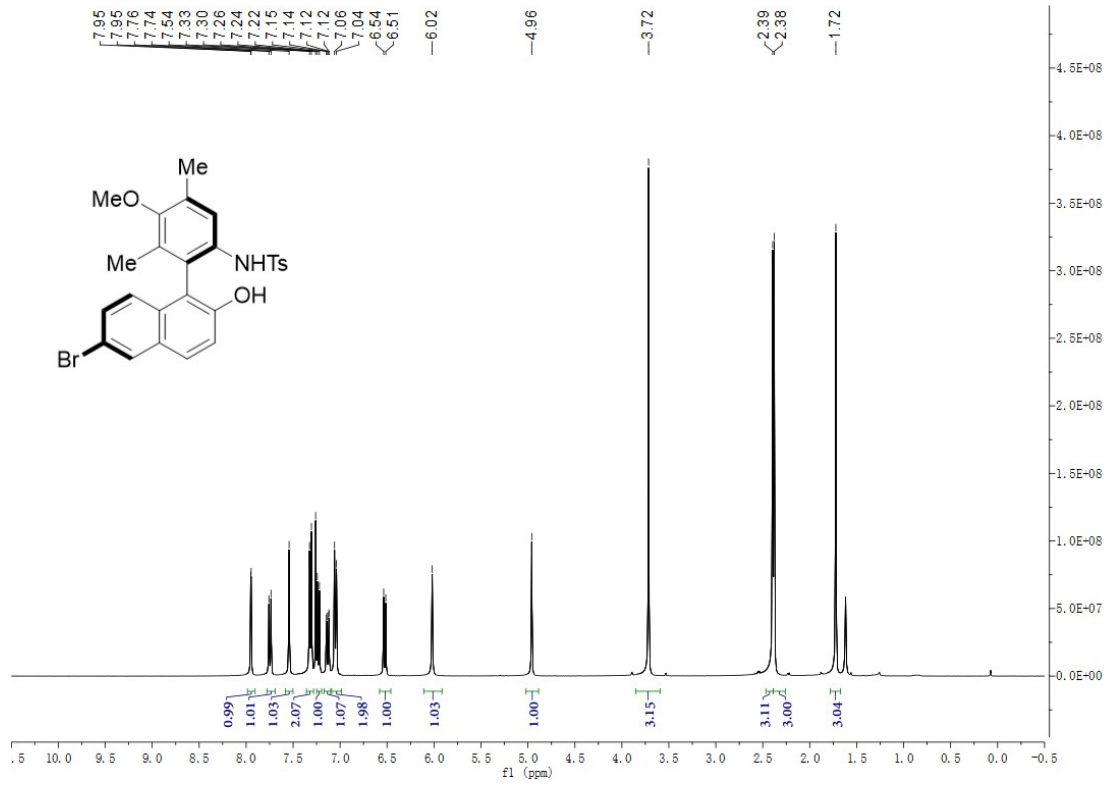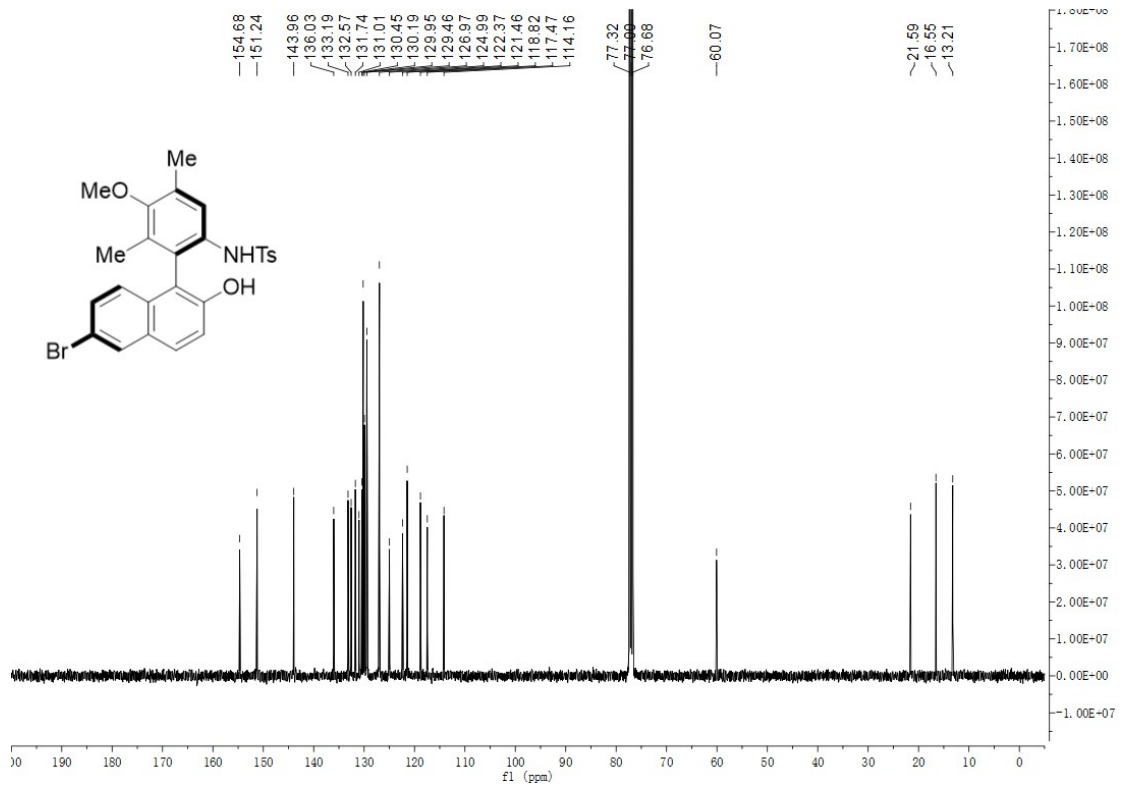

Compound **8d**

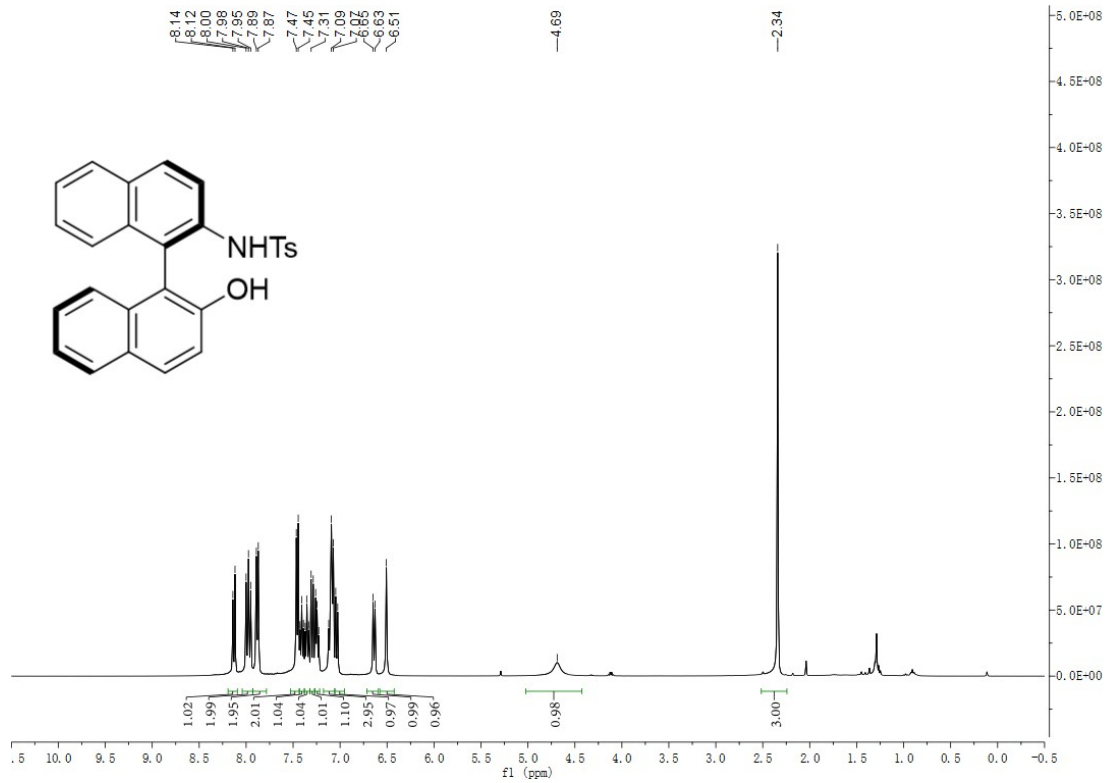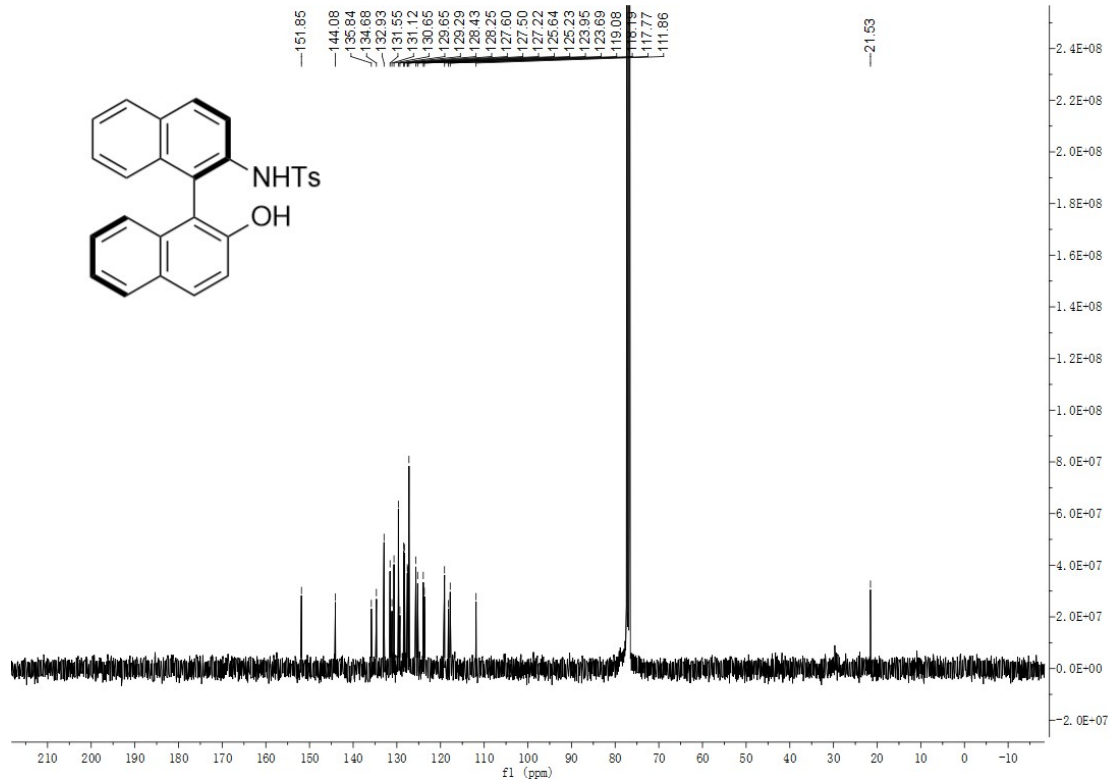

Compound **8e**

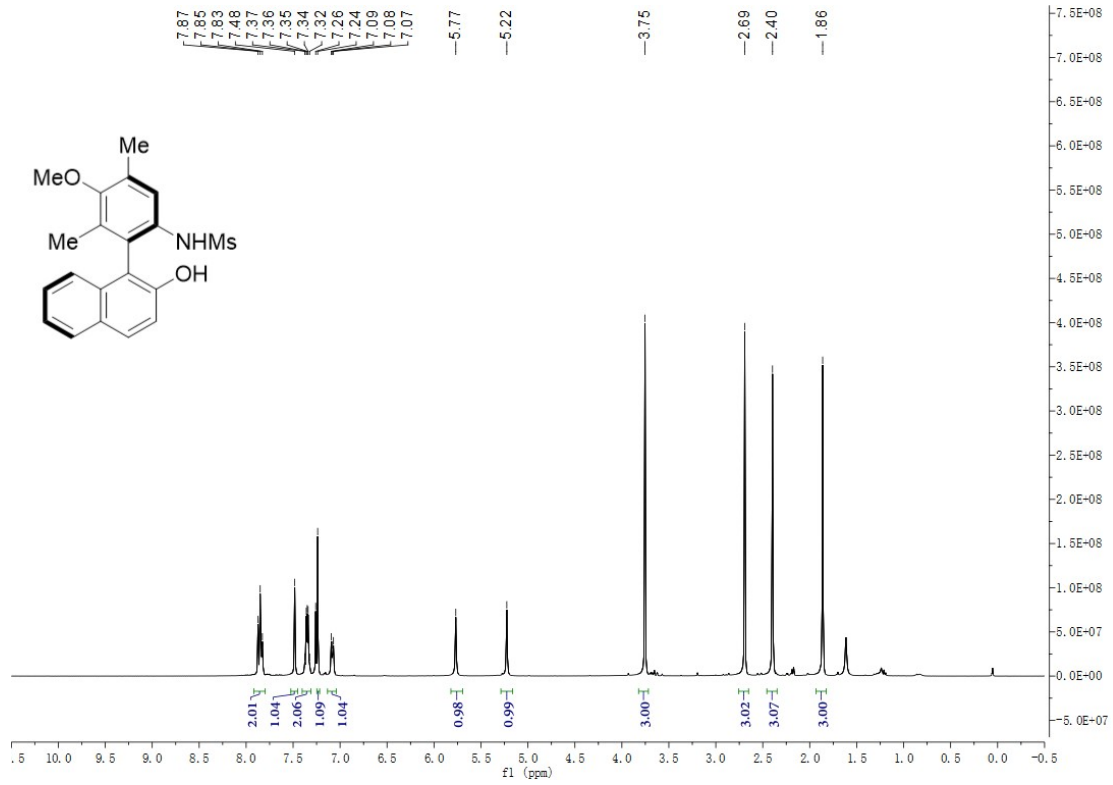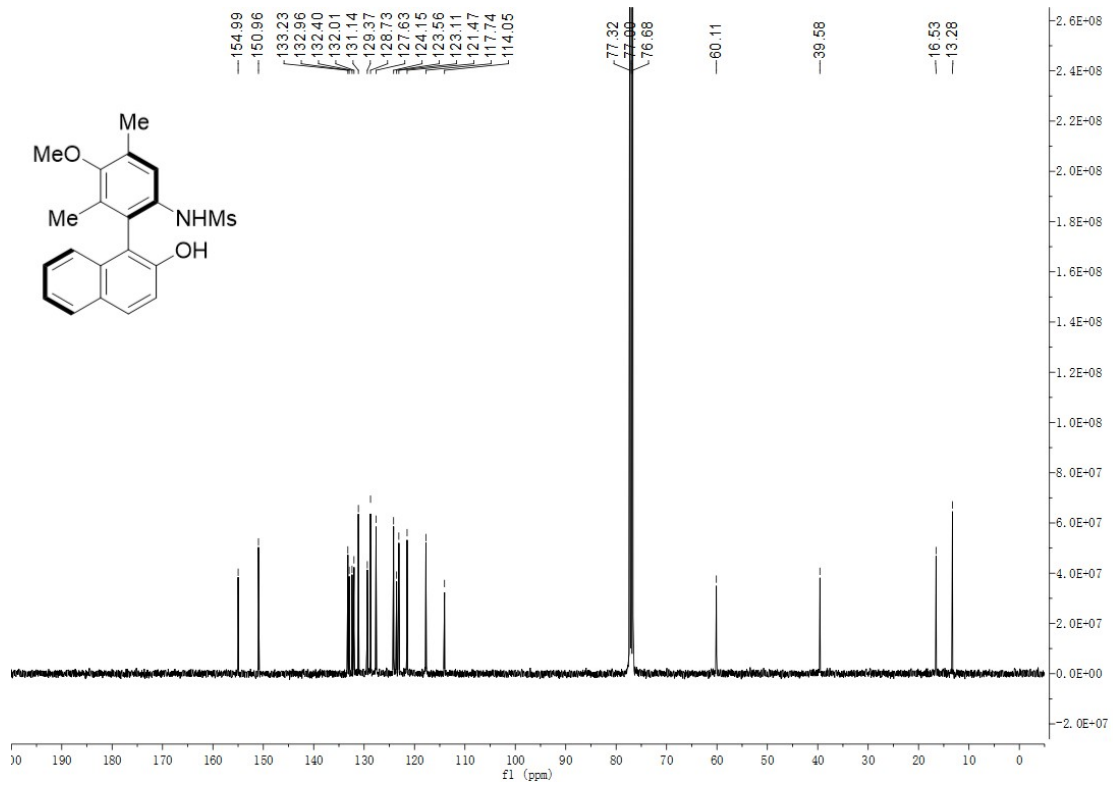



Compound **8f**

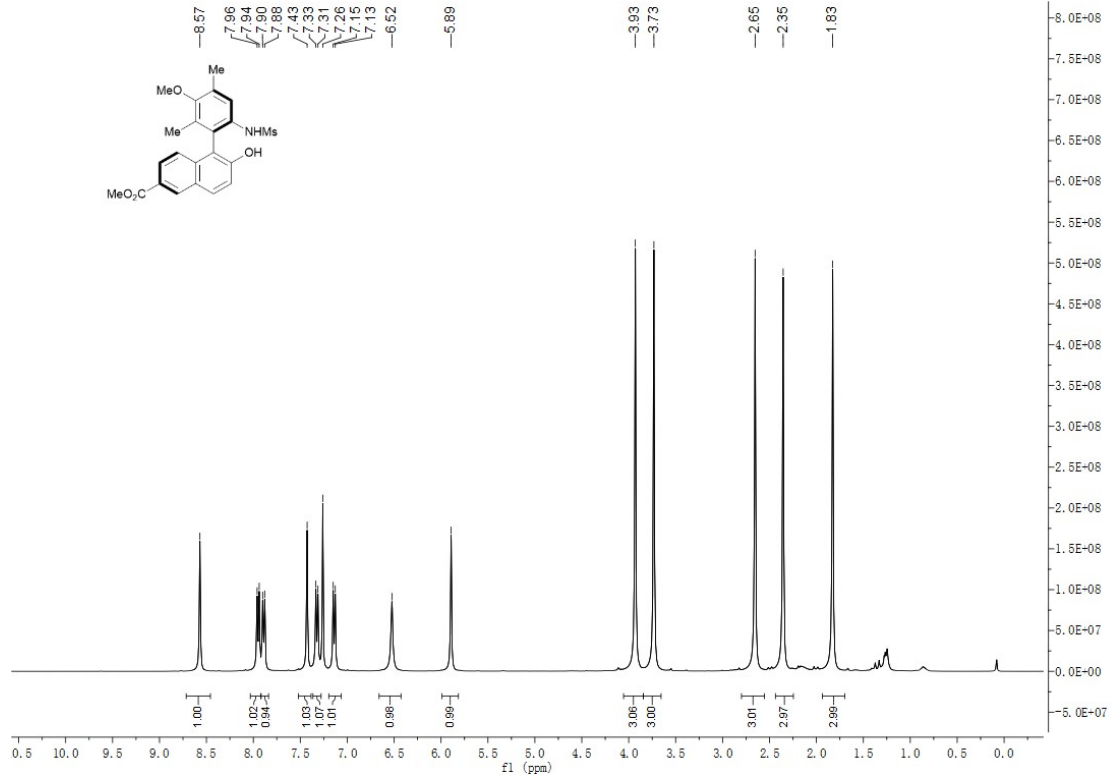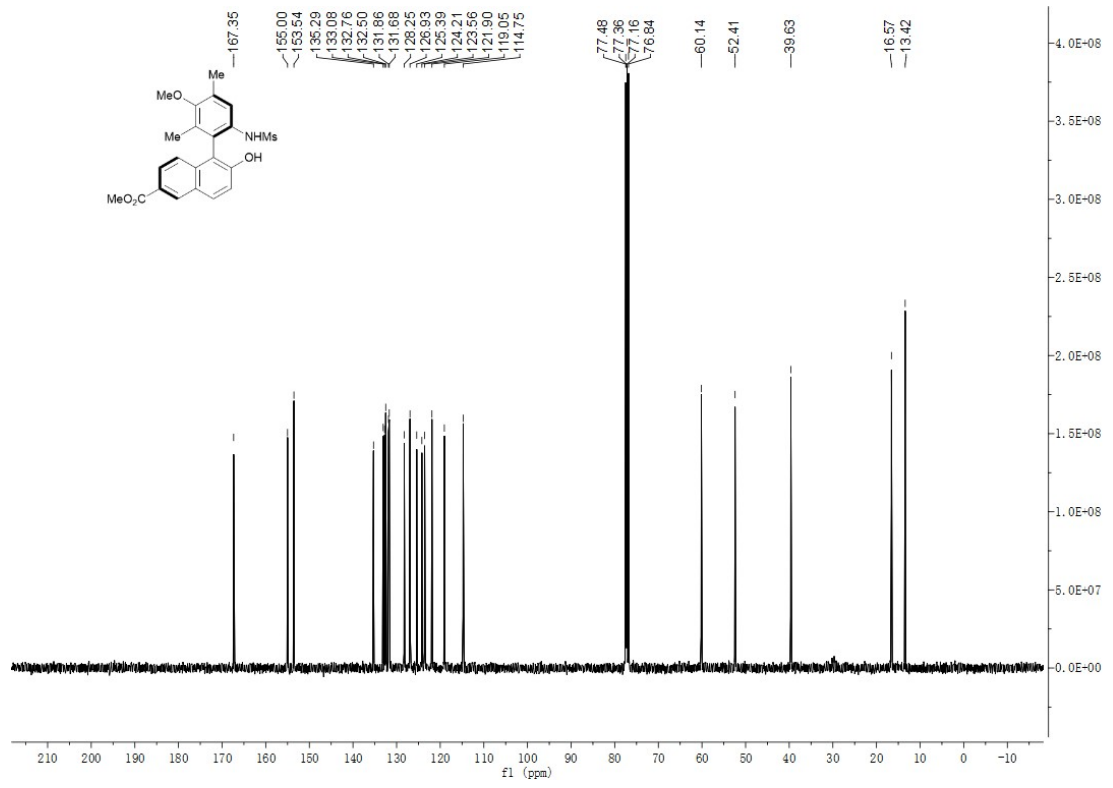

Compound 9a

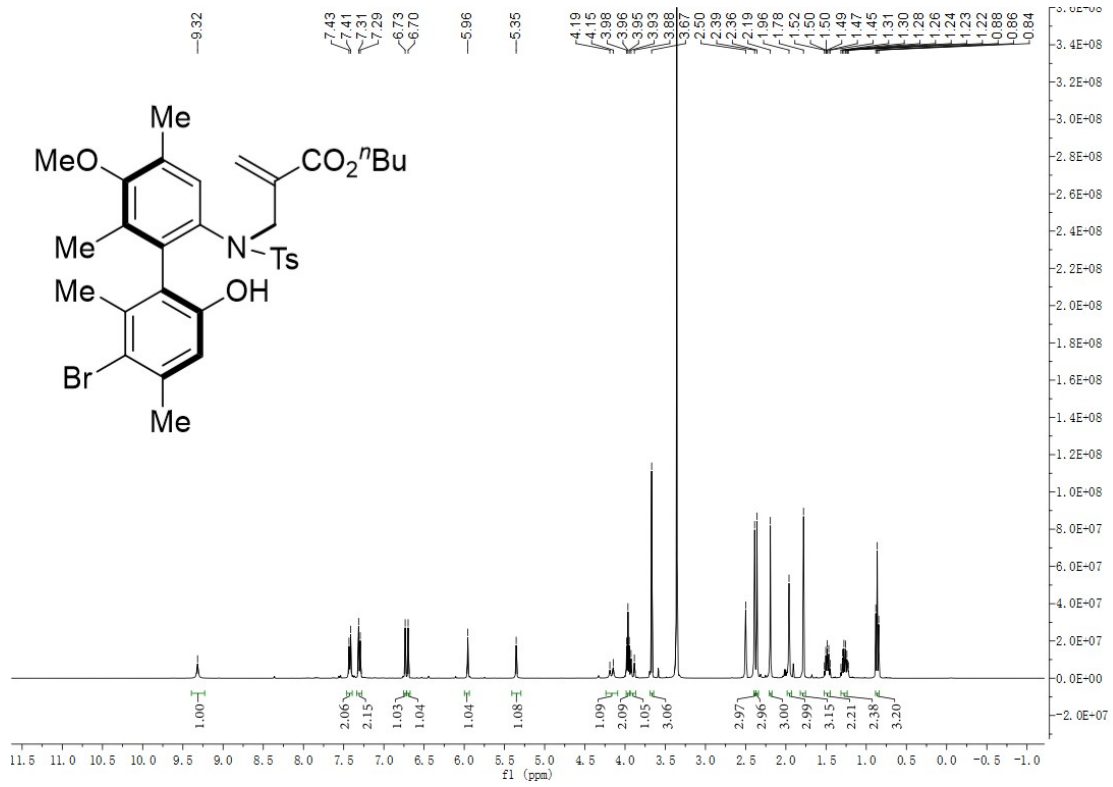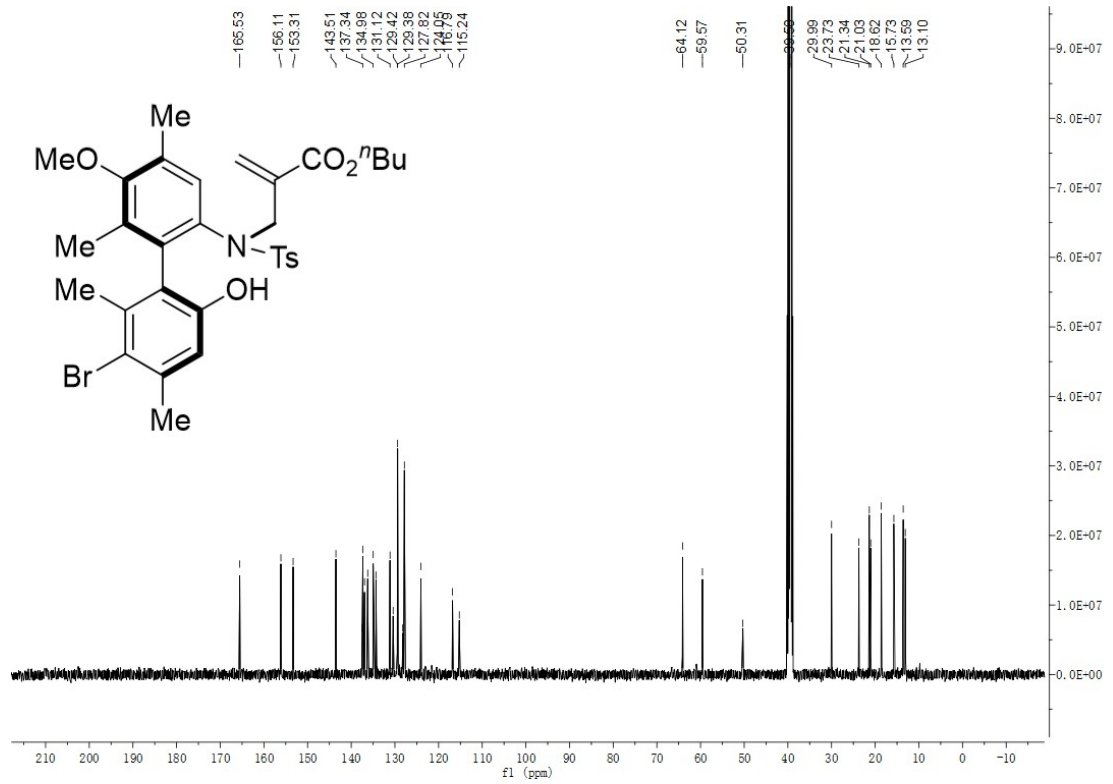

Compound **9b**

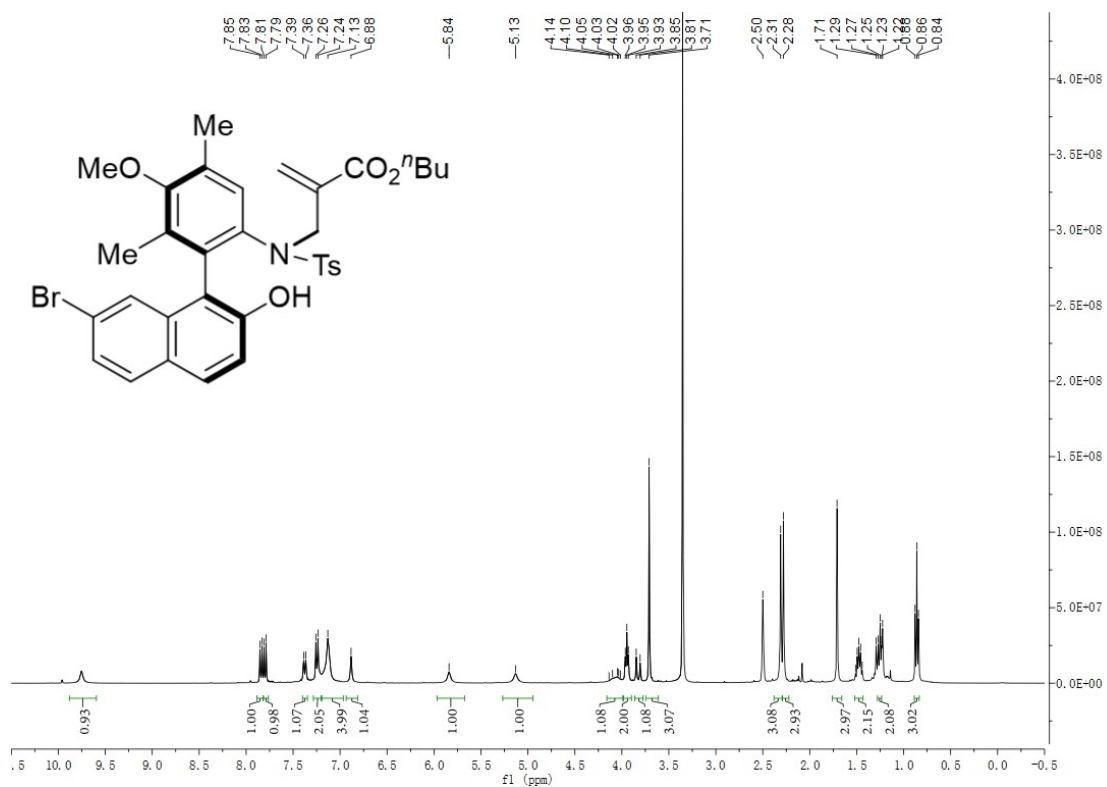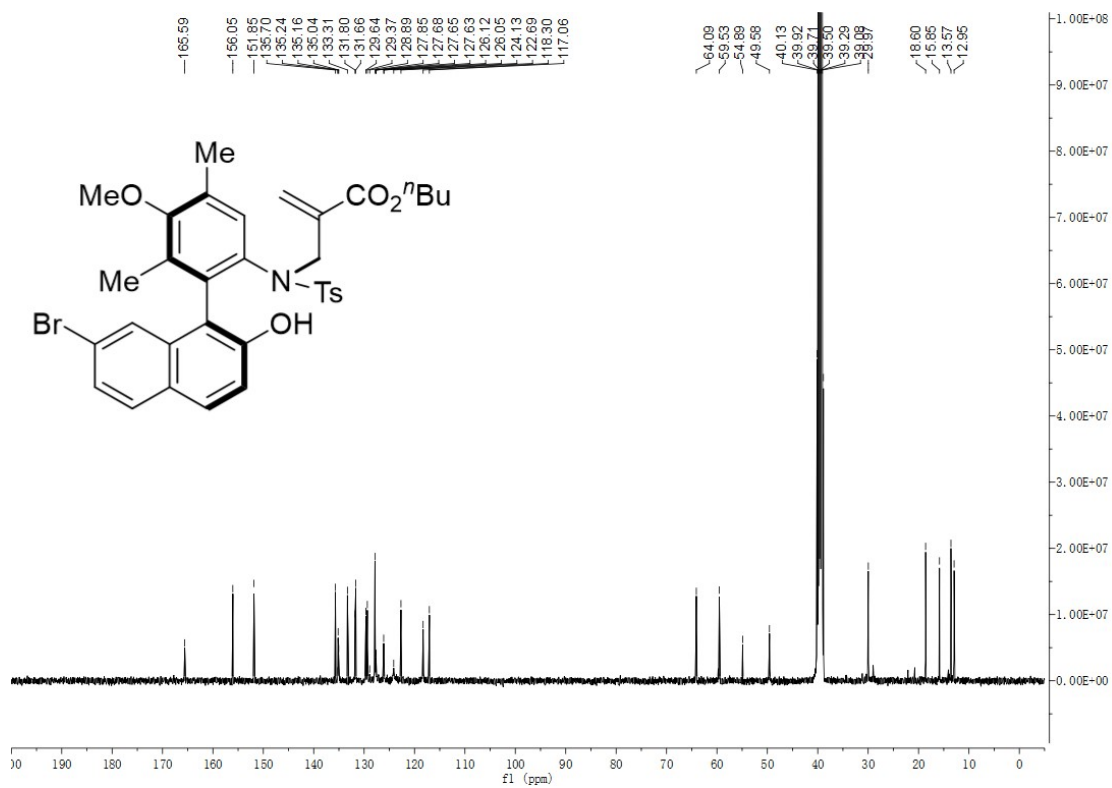

Compound 9c

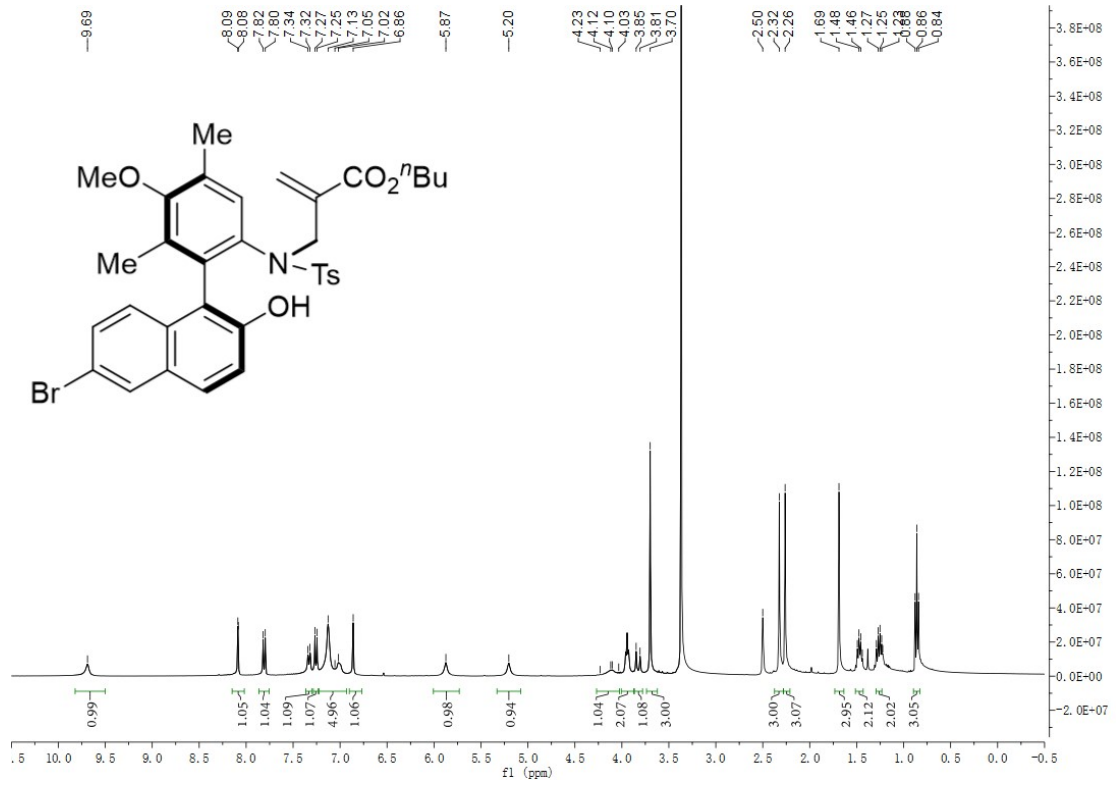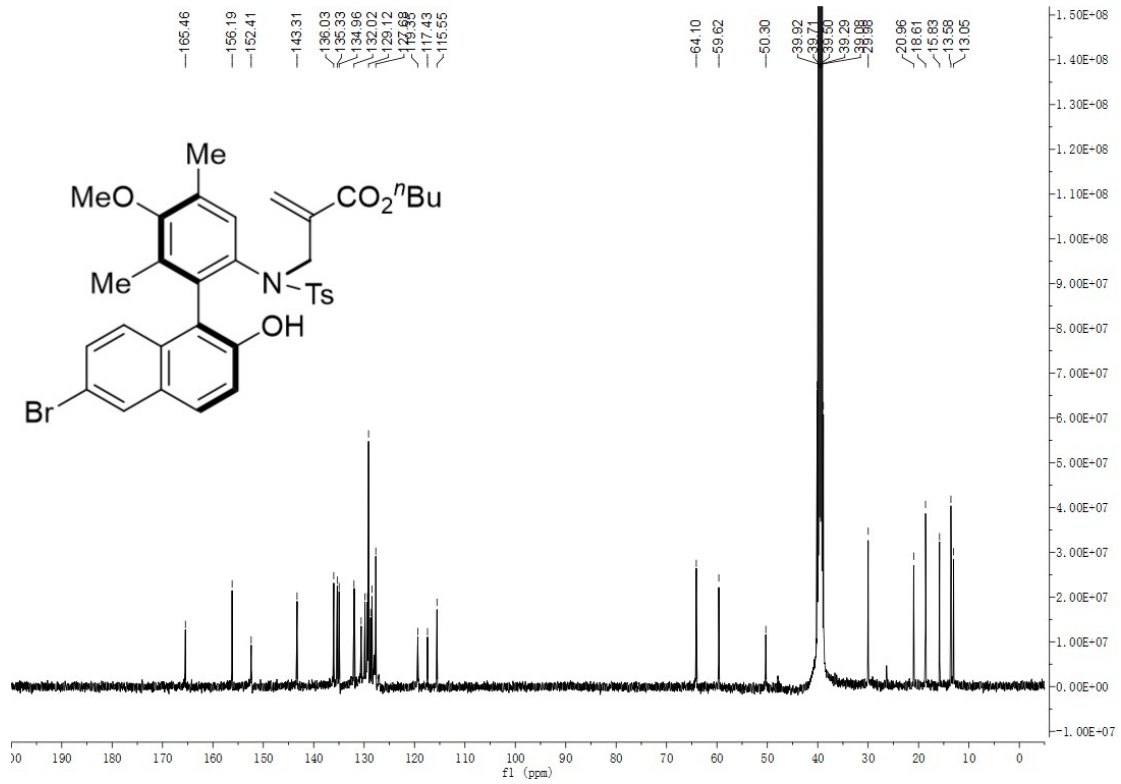

# Compound 9d

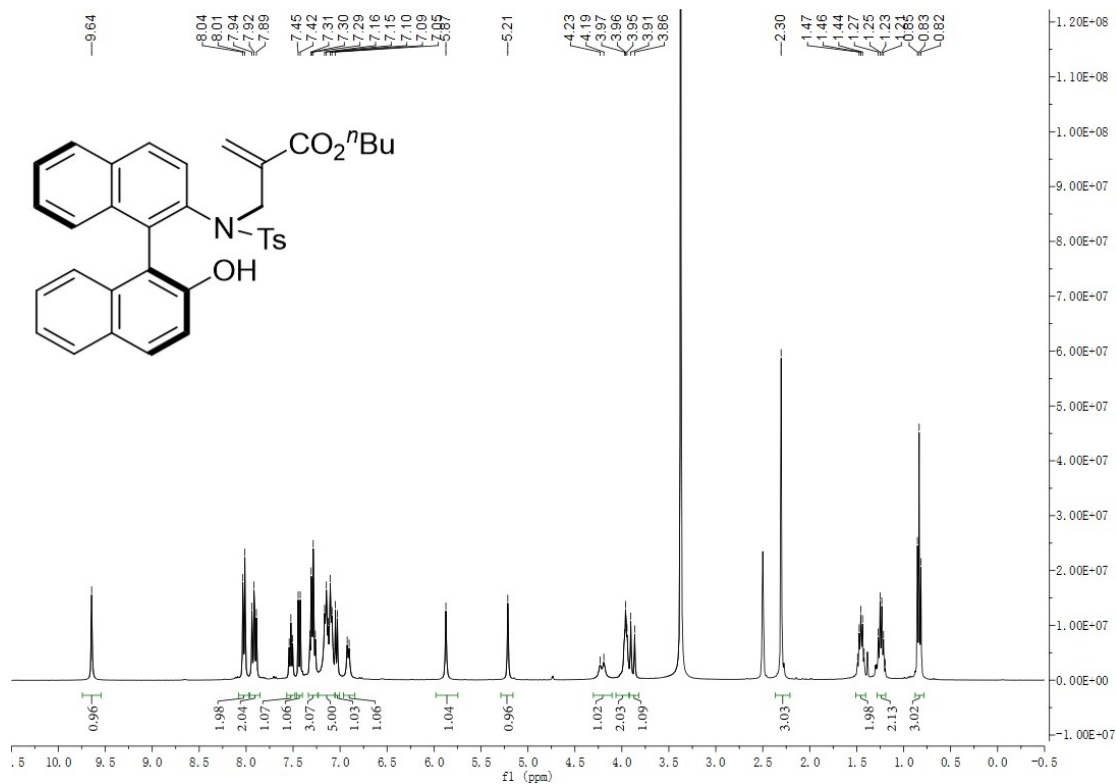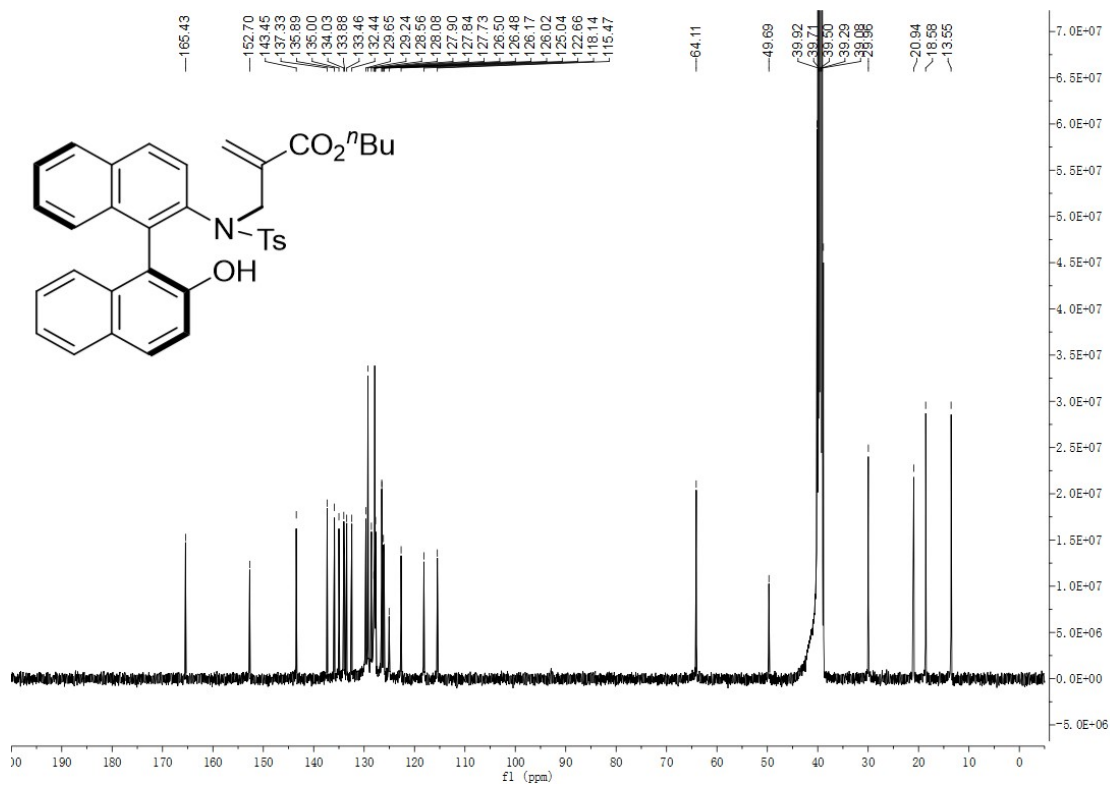

Compound 9e

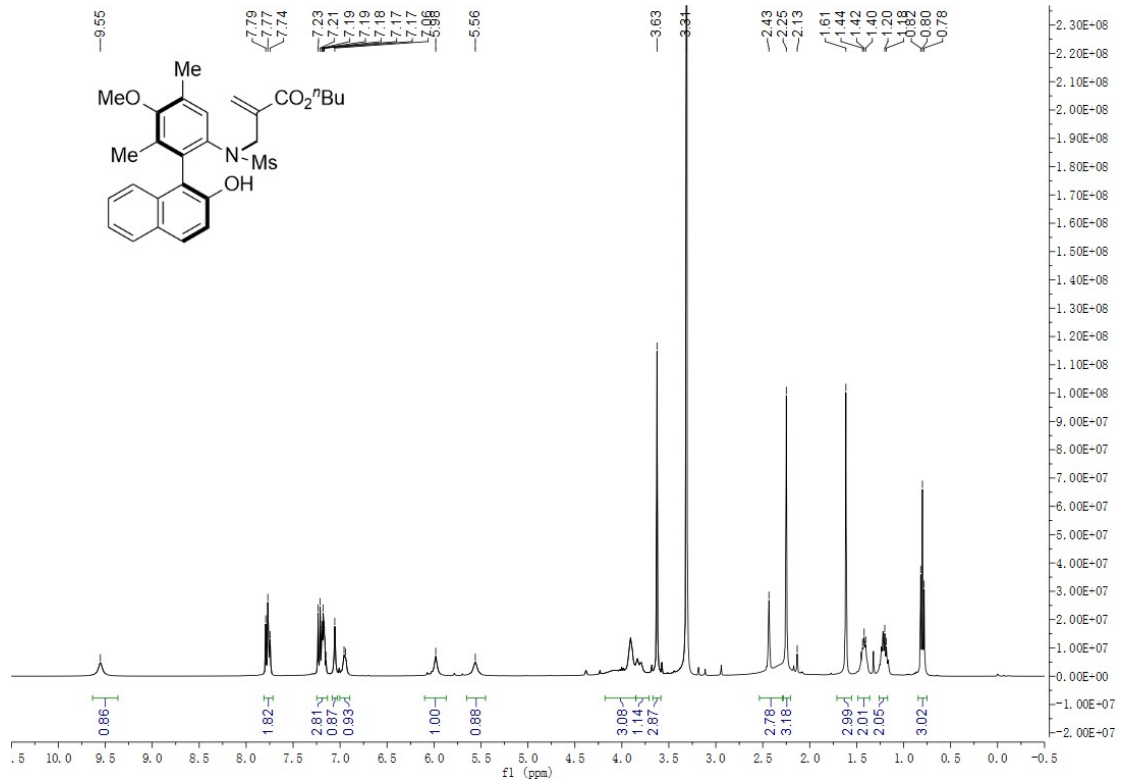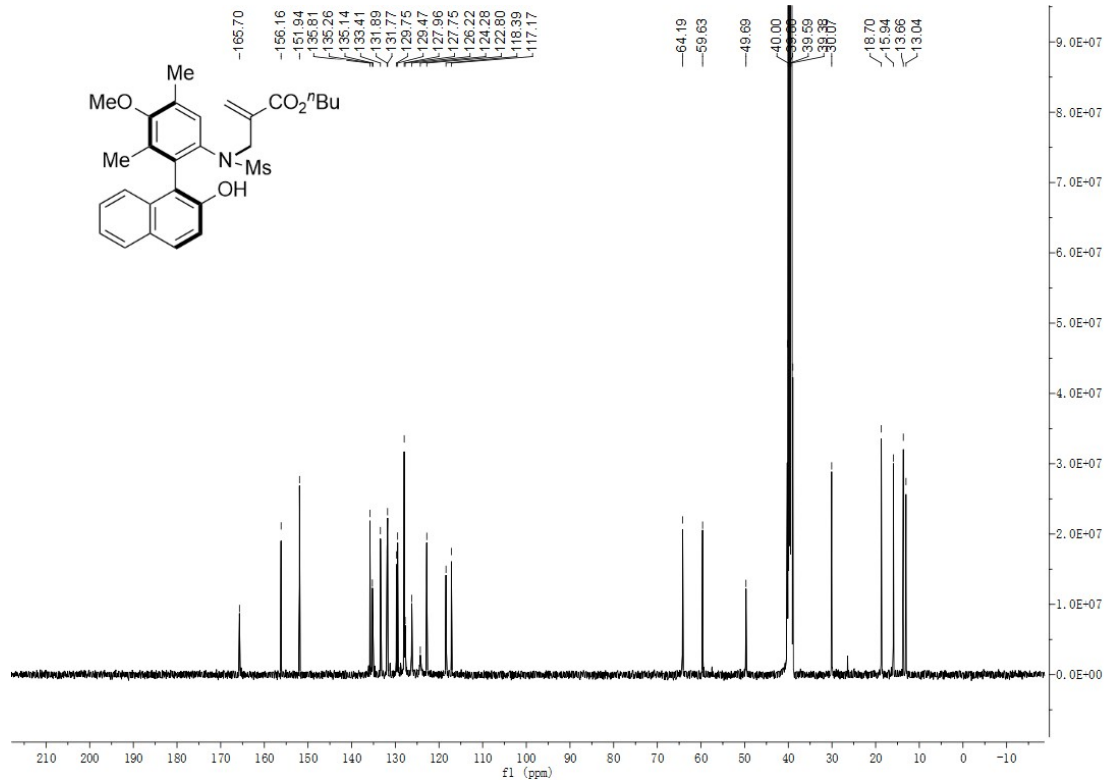

Compound **9f**

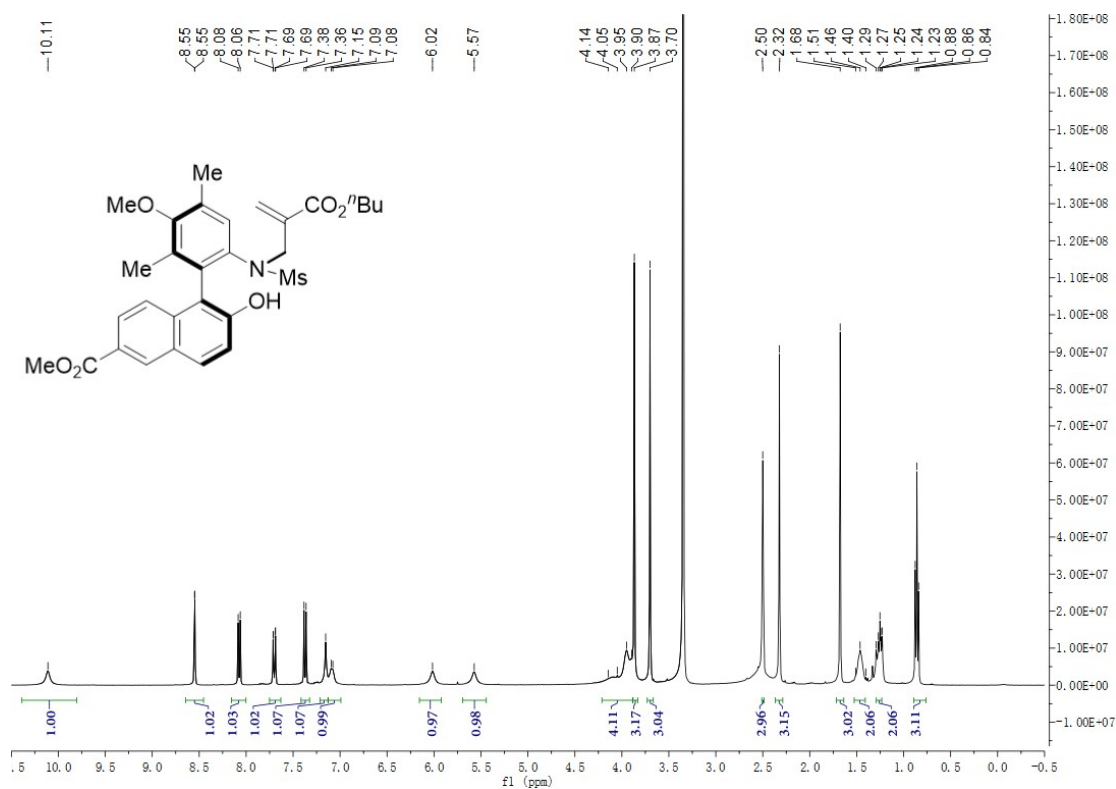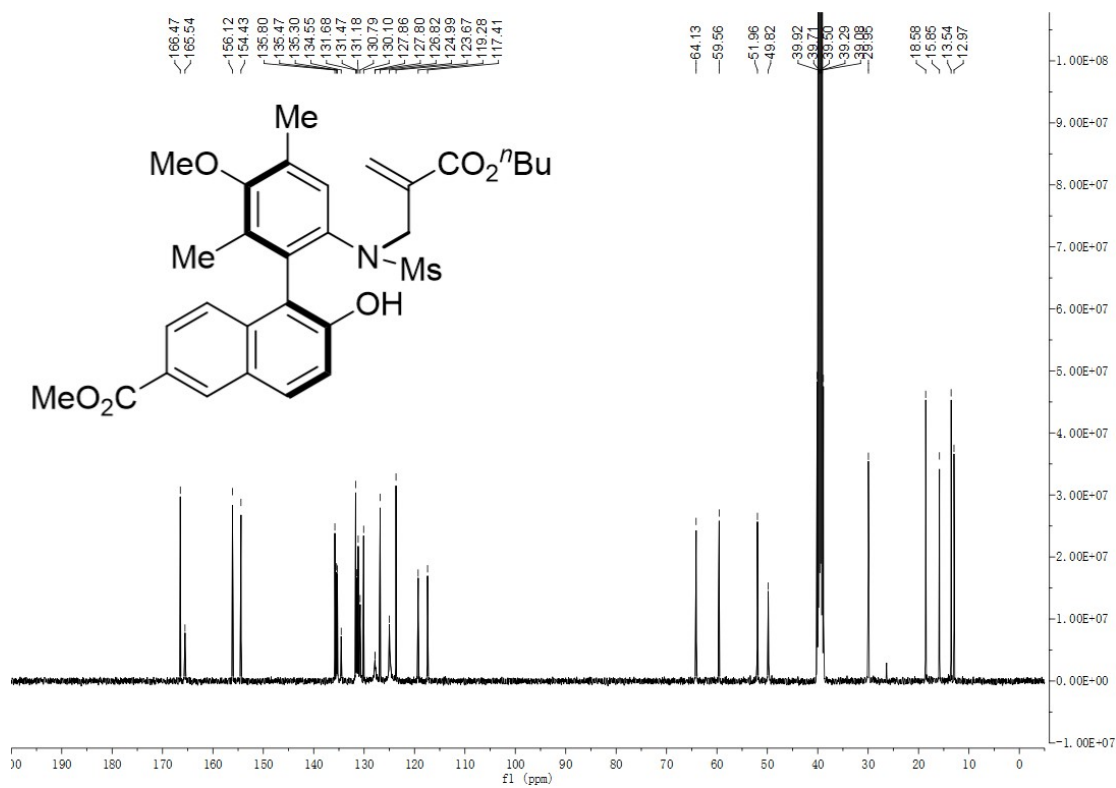

Compound SI-2

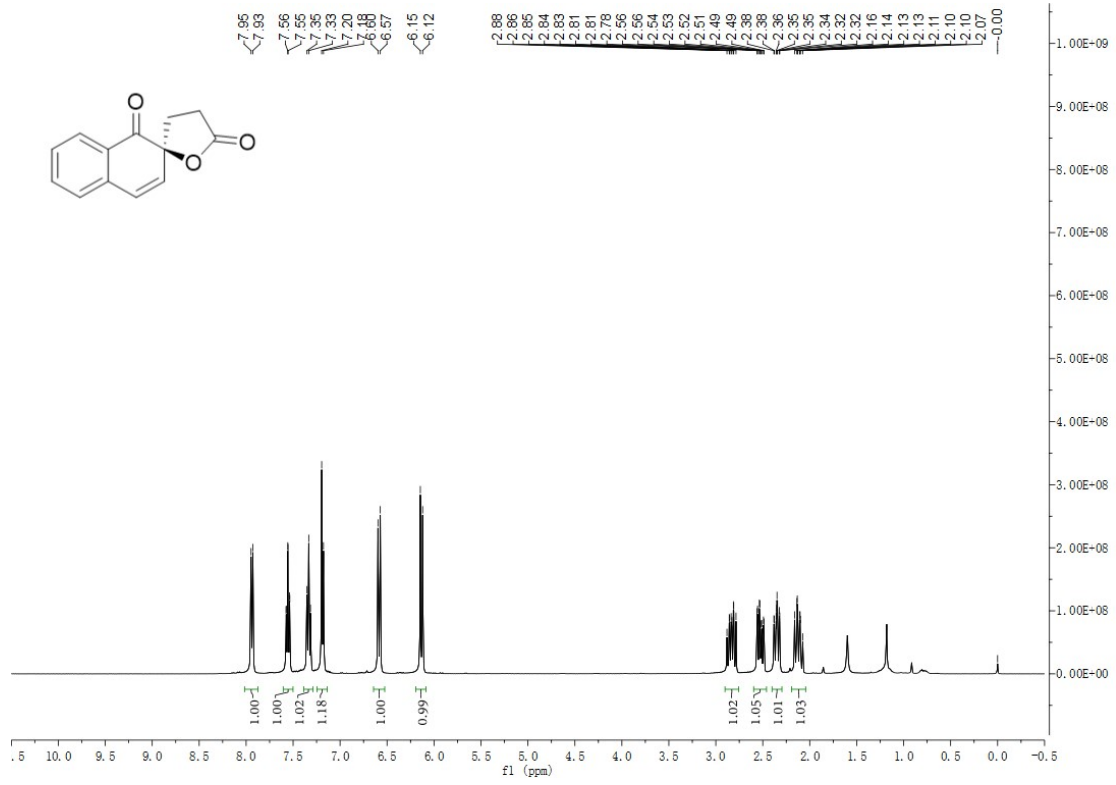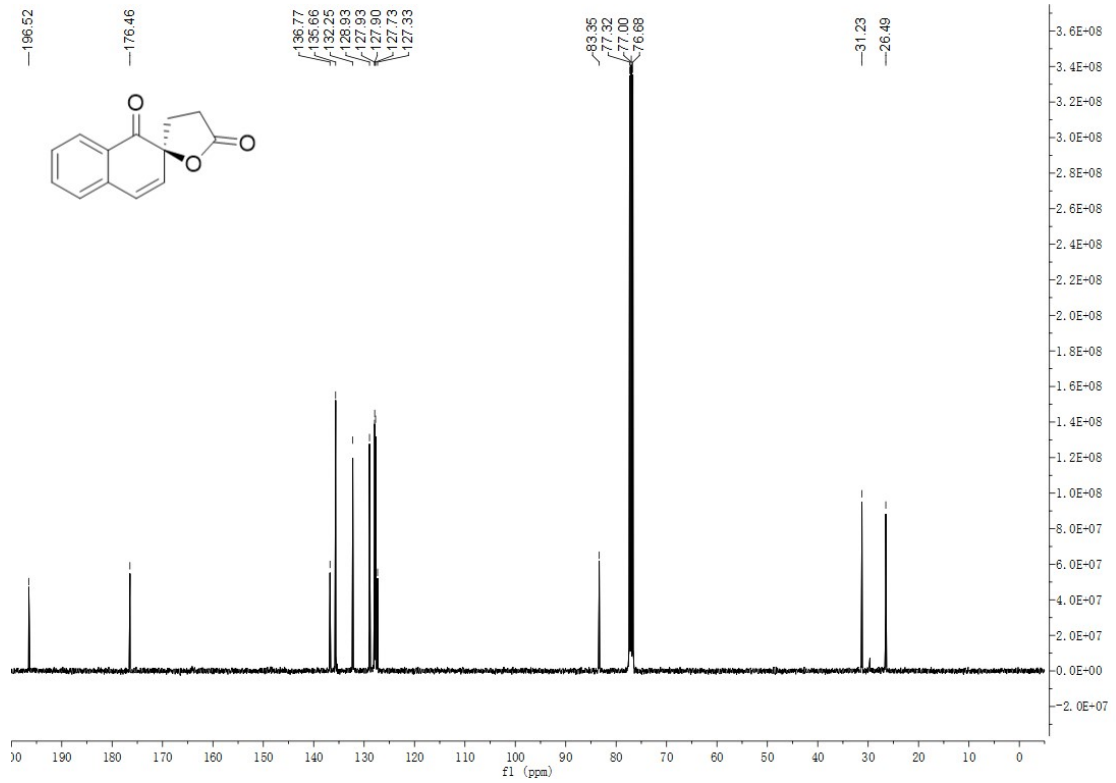



# Compound 10

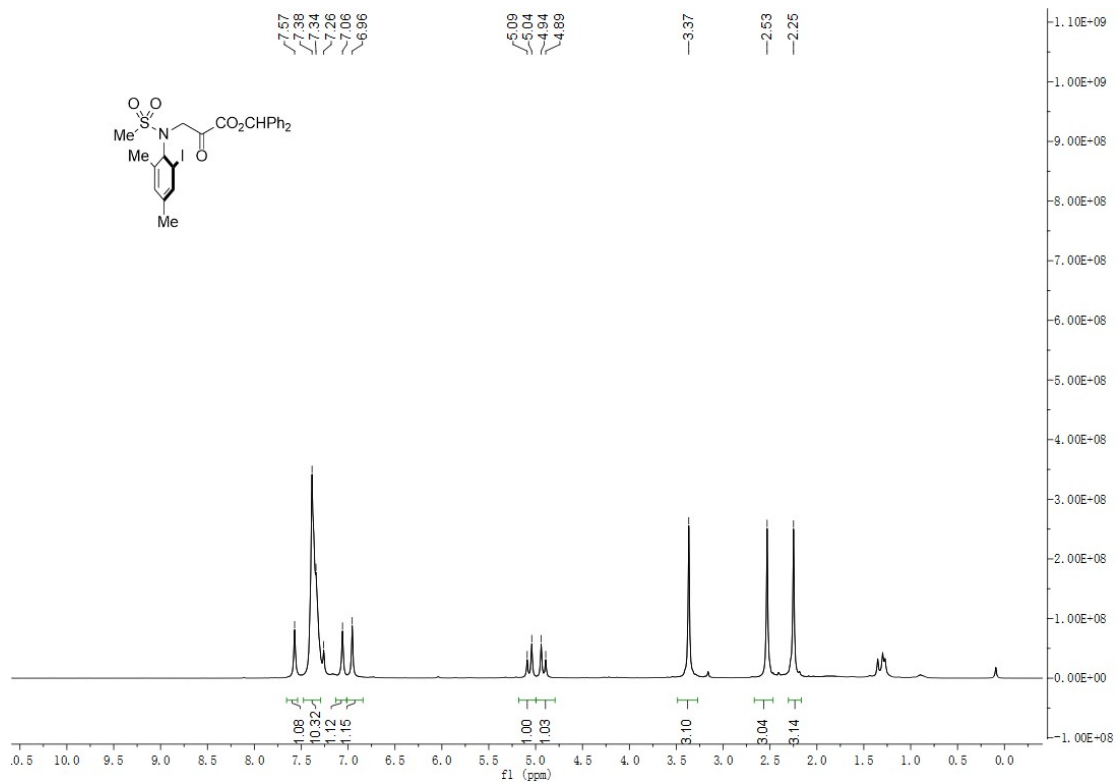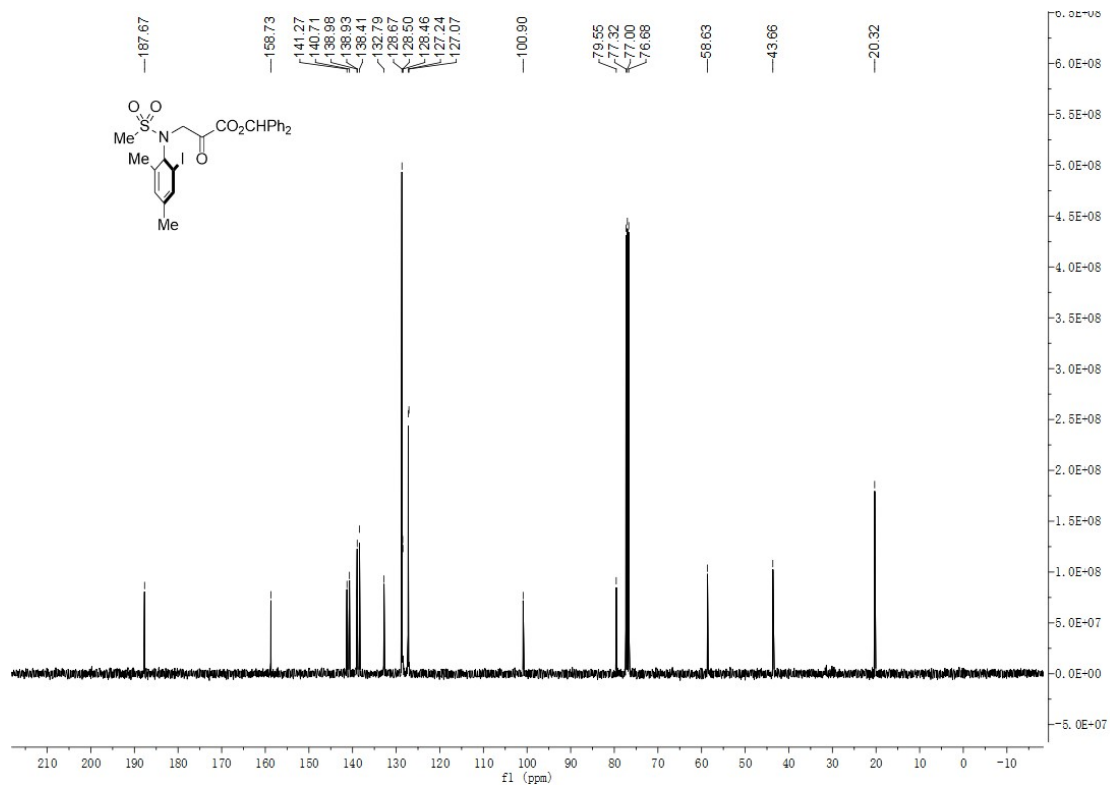

# Compound 11

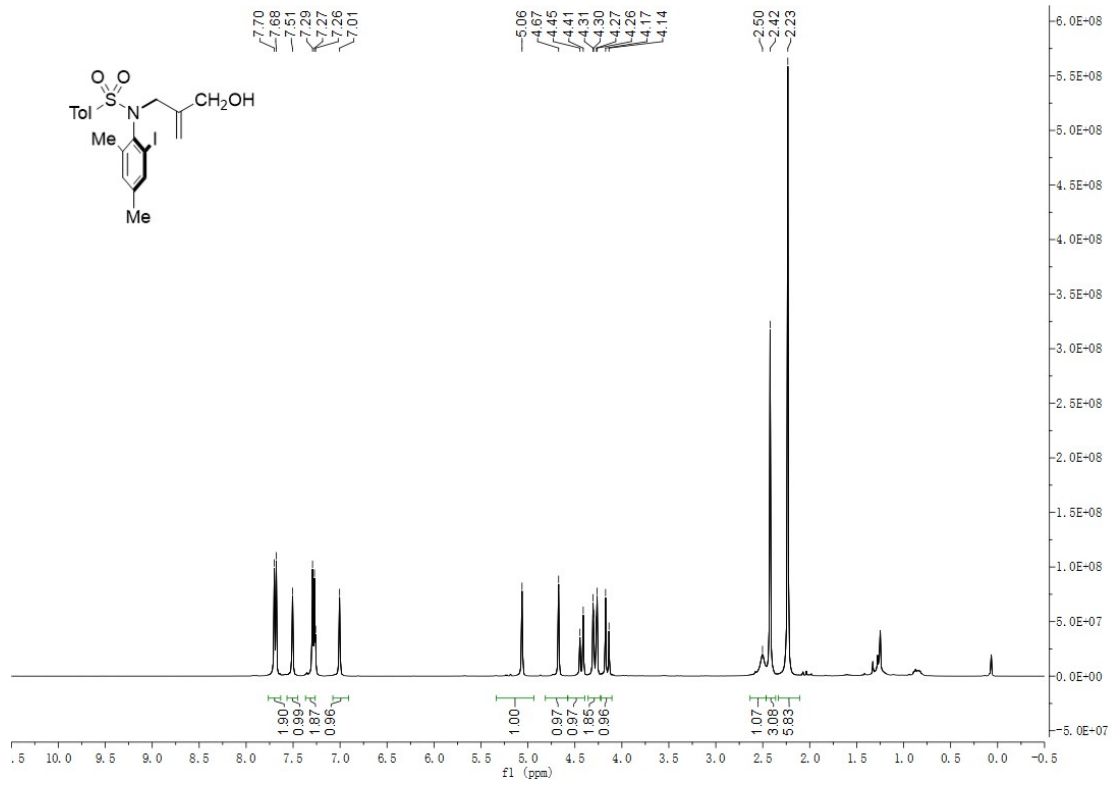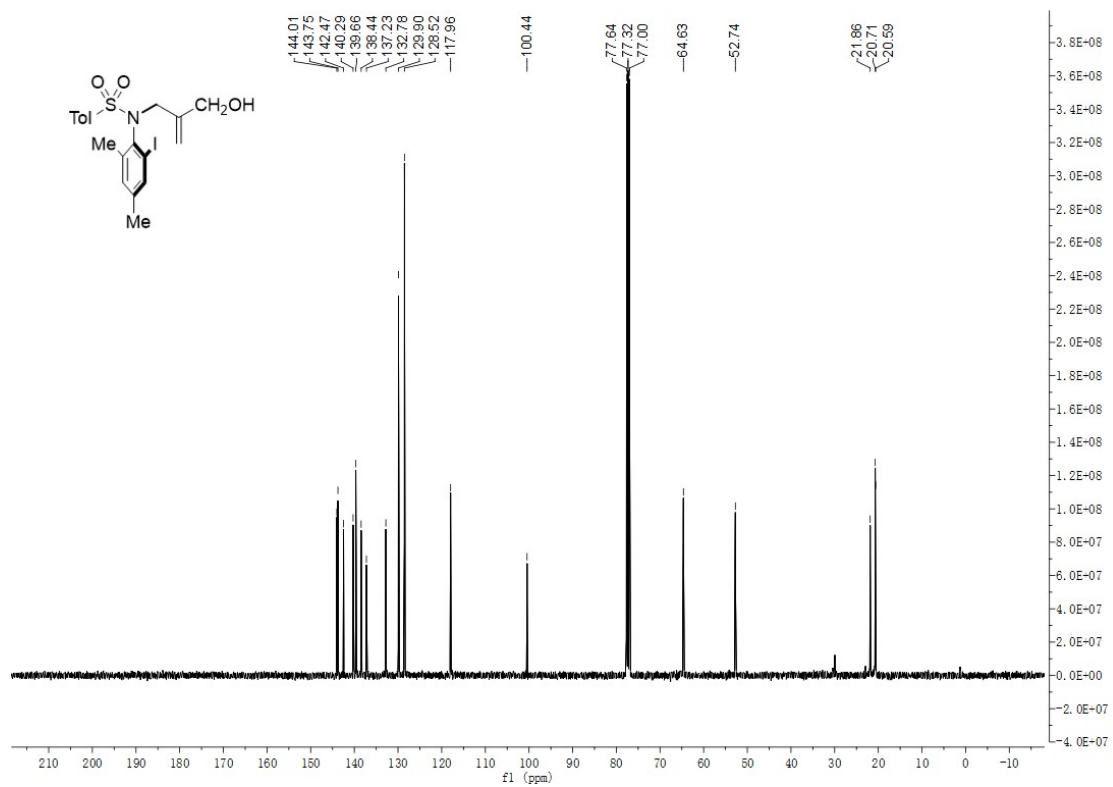

Supplement: d2qo00219a1.pdf [file d2qo00219a1.pdf]
